# Supplementary material for: Evidence linking APOBEC3B genesis and evolution of innate immune antagonism by gamma-herpesvirus ribonucleotide reductases
Source: eLife. 2022 Dec 2;11:e83893. doi: 10.7554/eLife.83893 (PMC9747160; doi:10.7554/eLife.83893)
Supplement: Figure 7—source data 1. [file elife-83893-fig7-data1.zip]

Archive with 16 entries (14 files):
- Figure 7-source data 1/
- __MACOSX/._Figure 7-source data 1
- Figure 7-source data 1/.DS_Store
- __MACOSX/Figure 7-source data 1/._.DS_Store
- Figure 7-source data 1/Figure 7-source data 1-raw files/
- __MACOSX/Figure 7-source data 1/._Figure 7-source data 1-raw files
- Figure 7-source data 1/Figure 7-source data 1-uncropped.pdf
- __MACOSX/Figure 7-source data 1/._Figure 7-source data 1-uncropped.pdf
- Figure 7-source data 1/Figure 7-source data 1-raw files/Figure 7-source data 1-IP-FLAG channel.tif
- __MACOSX/Figure 7-source data 1/Figure 7-source data 1-raw files/._Figure 7-source data 1-IP-FLAG channel.tif
- Figure 7-source data 1/Figure 7-source data 1-raw files/Figure 7-source data 1-IP-GFP channel.tif
- __MACOSX/Figure 7-source data 1/Figure 7-source data 1-raw files/._Figure 7-source data 1-IP-GFP channel.tif
- Figure 7-source data 1/Figure 7-source data 1-raw files/Figure 7-source data 1-input-FLAG and GAPDH channel.tif
- __MACOSX/Figure 7-source data 1/Figure 7-source data 1-raw files/._Figure 7-source data 1-input-FLAG and GAPDH channel.tif
- Figure 7-source data 1/Figure 7-source data 1-raw files/Figure 7-source data 1-input-GFP channel.tif
- __MACOSX/Figure 7-source data 1/Figure 7-source data 1-raw files/._Figure 7-source data 1-input-GFP channel.tif
