# Supplementary material for: Evidence linking APOBEC3B genesis and evolution of innate immune antagonism by gamma-herpesvirus ribonucleotide reductases
Source: eLife. 2022 Dec 2;11:e83893. doi: 10.7554/eLife.83893 (PMC9747160; doi:10.7554/eLife.83893)
Supplement: Source data 1. [file elife-83893-data1.xlsx]

## Sheet: SuppFile1
Supplementary File 1 - Numerical data presented in Figures
Tables
Figure 2D	Numerical data for Figure 2 panel D
Figure 2E	Numerical data for Figure 2 panel E
Figure 3D	Numerical data for Figure 3 panel D
Figure 3E	Numerical data for Figure 3 panel E
Figure 4C	Numerical data for Figure 4 panel C
Figure 4D	Numerical data for Figure 4 panel D

## Sheet: Figure 2D
Figure 2D: Quantification of cells showing A3 relocalization in 3 independent experiments
Top panel: EBV BORF2
	A3A			A3A L7 A3G			A3Bctd			A3Bctd L7 A3G			A3Gctd			A3Gctd L7 A3A/B
Total cell #	181	110	247	134	393	109	155	135	288	261	234	196	132	279	162	237	230	392
# cells with relocalization	163	92	194	10	56	14	136	114	224	64	66	64	8	52	20	226	217	362
% cells with relocalization	89.8	83.78	78.69	7.33	14.35	12.98	87.78	84.31	77.93	24.36	28.08	32.64	6.2	18.75	12.61	95.45	94.37	92.41
% cells with relocalization (mean)	84.09			11.5533			83.34			28.36			12.52			94.0767
% cells with relocalization (SD)	5.56148			3.72111			4.99613			4.1471			6.27548			1.54108
Bottom panel: KSHV ORF61
	A3A			A3A L7 A3G			A3Bctd			A3Bctd L7 A3G			A3Gctd			A3Gctd L7 A3A/B
Total cell #	141	144	267	359	223	125	285	256	120	215	326	268	141	206	113	229	108	223
# cells with relocalization	126	125	189	314	187	87	261	227	93	178	263	189	29	40	16	27	11	13
% cells with relocalization	89.57	87.08	70.74	87.58	83.81	69.58	91.54	88.79	77.72	82.89	80.52	70.54	20.35	19.38	14.06	11.8	10.54	6.04
% cells with relocalization (mean)	82.4633			80.3233			86.0167			77.9833			17.93			9.46
% cells with relocalization (SD)	10.2288			9.49303			7.31551			6.55413			3.38643			3.02807

## Sheet: Figure 2E
Figure 2E: Pearson Correlation Coefficient (PCC) values for GFP channel (indicated A3) and DAPI
Left panel: EBV BORF2 (PCC values)							Left panel: EBV BORF2 (PCC median)							Right panel: KSHV ORF61 (PCC values)							Right panel: KSHV ORF61 (PCC median)
A3A	A3A L7 A3G	A3Bctd	A3Bctd L7 A3G	A3Gctd	A3Gctd L7 A3A/B		A3A	A3A L7 A3G	A3Bctd	A3Bctd L7 A3G	A3Gctd	A3Gctd L7 A3A/B		A3A	A3A L7 A3G	A3Bctd	A3Bctd L7 A3G	A3Gctd	A3Gctd L7 A3A/B		A3A	A3A L7 A3G	A3Bctd	A3Bctd L7 A3G	A3Gctd	A3Gctd L7 A3A/B
-0.00720299	0.358675	0.0722025	-0.575586	-0.0305991	-0.00640121		-0.201319	0.223238	-0.110134	0.186824	0.230405	-0.250493		-0.231405	0.277048	-0.241776	0.585879	0.128425	0.367137		-0.148156	-0.0662724	0.0724321	0.0294403	0.280539	0.309736
-0.535151	0.0544925	-0.0801416	-0.642003	0.0821649	0.101227									-0.210996	-0.393856	-0.0343631	-0.119618	0.0827807	0.560938
-0.346673	0.189793	-0.294037	0.188627	0.60692	-0.0817328									-0.0578993	-0.270941	-0.208962	-0.101507	0.376359	0.290257
-0.239156	0.0361299	-0.0623099	-0.188936	0.279716	0.0612937									-0.0791348	0.456807	0.0466732	0.464437	0.618984	0.290987
-0.532289	0.239999	0.0097472	0.146322	0.39499	-0.05715									-0.427297	0.509891	-0.247098	0.349051	0.261112	0.653234
-0.21046	0.336156	-0.161372	0.0907025	0.00606595	-0.374271									-0.295331	-0.565235	-0.212106	0.0156396	0.855022	0.599982
-0.190279	0.291985	-0.116282	-0.220827	0.218524	-0.151621									-0.331135	-0.437398	-0.29456	0.423629	0.618355	0.276754
-0.0038584	-0.0508305	-0.0503143	-0.02122	-0.0169082	-0.384323									-0.254977	-0.371218	-0.129823	0.276757	0.540512	0.45133
-0.462463	0.0470138	-0.0808004	0.235862	0.145665	-0.705253									0.545632	-0.523441	-0.140907	0.0638942	0.175322	0.49212
0.137009	0.354643	0.104401	0.436084	-0.0302307	-0.348098									0.179018	-0.637657	-0.165255	0.0684831	0.323882	0.0350186
-0.401055	0.237436	-0.488007	0.529522	-0.0257069	-0.401707									-0.344457	-0.636604	-0.0618684	-0.155128	0.223109	0.288323
0.126379	-0.153383	-0.250201	0.442038	0.0839999	-0.00876428									-0.479392	-0.0591821	-0.168773	-0.123517	0.507869	0.499105
-0.318684	0.134929	0.255059	0.391142	0.184534	0.0167177									-0.280806	0.232974	-0.288647	0.199796	-0.0526565	0.587174
0.388029	-0.18524	0.215131	0.373322	0.0397865	-0.00876632									-0.385402	-0.444068	0.0269135	0.0121931	0.521732	0.0413368
-0.201919	-0.0739862	-0.015613	-0.0930811	0.0416418	-0.558612									-0.0333555	0.658503	0.33209	0.32475	0.329553	0.332765
-0.360188	-0.382081	-0.24518	-0.299376	0.658435	-0.366513									-0.226381	0.484756	0.342032	-0.241399	0.114263	0.468387
-0.045053	0.0623673	-0.0769667	0.418832	0.376563	-0.336923									-0.219897	0.229729	0.307534	-0.333873	0.172552	0.38516
-0.251874	0.266824	0.102414	-0.192771	0.202442	-0.150258									-0.16384	-0.485727	0.103241	0.17965	0.611046	0.106589
-0.19576	0.551582	0.00390604	0.482458	0.0807578	-0.0412876									-0.238059	-0.704764	0.128065	-0.225367	0.36577	0.149621
-0.0208536	0.244862	-0.040375	0.578269	0.15705	-0.310577									-0.228068	-0.541874	-0.0112405	0.468199	0.251181	0.36691
-0.230448	-0.0295964	-0.304236	-0.159717	0.190442	-0.501271									-0.285255	-0.375262	0.0855694	0.662646	0.509551	0.347068
-0.241301	0.558454	-0.0753049	0.0883223	0.17826	-0.271439									0.353931	0.231614	-0.142841	0.155597	0.106645	-0.177133
-0.435462	0.430496	0.0626629	-0.429431	-0.00451149	-0.235632									-0.363765	-0.332458	-0.00364861	-0.118399	0.655744	0.569705
0.0643211	-0.0359048	-0.314523	0.0604129	0.345141	-0.421849									-0.375777	-0.018673	0.0515276	-0.112491	0.127447	0.457745
-0.247521	0.185588	-0.198854	0.453996	0.191861	-0.559299									-0.212577	-0.294385	-0.442729	0.344424	-0.0206387	0.468272
-0.115252	0.09324	0.156104	0.2622	0.553329	-0.547955									-0.0875262	0.499735	-0.254264	0.222015	-0.279461	0.380201
-0.404653	0.0739084	-0.261839	-0.30497	0.143518	-0.435015									-0.224951	-0.0197912	-0.130644	0.140875	0.45717	0.418136
-0.000651776	0.337612	-0.254926	0.715852	0.0923907	-0.41253									-0.19234	0.00801504	-0.143442	0.0784331	0.624786	0.725338
0.00110252	0.327648	0.308799	-0.61313	-0.0118214	-0.462077									-0.21619	-0.44604	0.0454602	-0.413021	0.215651	0.785054
-0.337854	0.175084	-0.457659	-0.093043	0.00269075	-0.393587									-0.141884	-0.294941	0.00144656	0.413017	0.517588	0.590552
-0.288348	0.401998	-0.0830034	0.439682	0.196021	-0.34353									-0.277085	0.723173	0.107484	-0.106882	0.0953946	0.334359
-0.381794	0.270835	0.220195	0.647706	0.100911	-0.297336									-0.379273	0.447985	-0.11246	0.438352	-0.0610874	0.528761
-0.348635	0.0506374	-0.0355507	0.115624	0.476106	-0.36816									-0.0679545	-0.0326533	0.293547	-0.35712	0.688029	0.224018
-0.239801	0.0630686	-0.0753525	0.136922	0.122903	-0.180291									-0.418035	0.232739	-0.0916219	0.440757	0.0291605	0.041886
-0.338077	0.475271	-0.113891	0.0240634	0.434462	-0.048417									-0.343224	-0.0369616	-0.261074	-0.0472565	0.492847	0.276945
0.767148	-0.0431436	-0.132535	0.672674	0.276053	-0.552552									-0.465143	0.589116	0.0259759	0.382972	0.435983	0.631122
-0.448716	-0.089708	-0.441564	0.512585	-0.0650535	-0.519236									0.553593	0.0671773	0.1225	-0.199733	0.405594	0.444749
-0.296525	-0.196201	0.448187	0.024148	-0.0316381	-0.332078									-0.430312	0.210601	0.597929	0.688881	0.544249	0.444004
-0.571086	0.0449098	0.00503401	-0.403478	0.235953	-0.305372									-0.333196	-0.254577	-0.380661	0.401028	0.458857	0.325324
-0.123495	0.0930326	0.248686	-0.0933847	0.598827	-0.64117									0.0140449	-0.186594	0.0206764	0.339301	0.352157	0.581841
0.185055	0.245304	-0.345481	0.531891	0.435631	-0.368493									-0.465209	-0.109583	0.327412	-0.16107	0.463319	0.381715
-0.226526	0.303946	-0.382328	0.0560436	0.237846	-0.0516861									-0.286677	-0.191817	-0.0194191	-0.0683807	0.527348	0.426211
-0.545375	0.316604	-0.061304	0.768861	0.225954	-0.331906									-0.595191	-0.333905	0.0219388	0.10686	0.859021	-0.104109
-0.252844	0.25854	-0.161883	-0.0107701	0.48984	-0.282809									-0.321182	-0.247298	-0.0672604	0.103442	0.577873	0.50833
-0.331543	0.576408	0.236039	0.411019	0.341191	-0.321675									-0.0302421	-0.653189	0.131523	-0.0617382	0.536732	0.422969
-0.0268422	0.371075	-0.0661522	-0.806095	-0.0575741	-0.494624									-0.0234364	-0.0211462	-0.143068	-0.0968822	0.504034	0.509214
-0.361723	0.0527259	-0.16263	-0.21121	0.473927	-0.421262									0.00201088	-0.491484	0.245389	0.648868	-0.0103249	0.512346
-0.619921	-0.259957	-0.608773	-0.240483	0.463073	-0.543325									-0.291525	-0.442512	0.164252	0.0243275	-0.0285132	0.293531
0.0104991	0.137857	-0.340462	0.479482	0.590238	-0.438517									-0.43335	0.146831	0.527853	0.491626	-0.0277317	0.446583
-0.267686	-0.00733609	-0.219332	-0.140006	-0.222504	-0.179596									0.118871	-0.38289	-0.3815	0.165528	0.462243	0.533664
-0.659896	0.601898	0.0140243	0.124298	-0.313283	-0.0567764									-0.491202	-0.191937	-0.265937	0.036151	0.268241	0.56856
-0.429095	0.369118	0.526509	0.33604	0.168445	-0.263674									-0.0665709	-0.572458	0.909284	0.678224	0.418526	0.566141
0.00741106	-0.0318298	-0.33982	0.18299	0.466697	-0.119929									-0.309928	-0.262118	0.015265	0.399739	0.145594	0.288438
-0.185768	0.300323	0.275006	0.14872	0.153983	-0.296881									0.466504	-0.475154	0.222413	0.147354	-0.00674414	0.347689
-0.269153	0.293495	-0.319799	0.10512	0.478378	-0.473348									0.552996	-0.192082	0.632127	0.277535	0.60101	-0.0363455
-0.0866198	0.0457902	-0.0210264	-0.345629	0.0119519	-0.220225									0.401223	-0.110067	0.221172	0.590859	-0.0255963	0.324507
-0.33693	0.364351	0.0629357	-0.0843862	0.535852	0.015525									-0.28758	0.336865	0.369276	0.153483	0.0720389	0.276788
-0.127499	0.229144	-0.143921	-0.0874197	0.355325	-0.423801									-0.208625	-0.382105	0.650632	0.521159	0.704886	0.418626
-0.42481	0.862745	-0.349188	0.0600535	-0.342336	-0.299255									-0.437523	-0.345793	-0.13152	0.52917	0.549239	0.54956
-0.377037	0.0452228	0.163826	0.0175853	0.220643	-0.308445									-0.348018	0.0418883	0.222216	0.468816	-0.0910625	0.0488344
-0.462865	0.218765	-0.456218	0.0265927	0.174411	-0.563565									-0.022189	-0.412076	-0.0177132	-0.186585	0.607241	-0.0382352
-0.0111142	0.0671231	0.157384	-0.224993	-0.215804	-0.144578									-0.21583	-0.164308	0.182033	0.0992879	0.419662	0.230503
-0.0159554	0.167581	0.198328	0.156964	0.41847	0.171473									-0.172361	-0.441968	0.412111	-0.135831	0.275277	0.296199
-0.410377	0.253076	0.595067	0.532486	0.147908	-0.169975									-0.206915	-0.322559	0.162377	0.382762	0.334408	0.540405
-0.463793	0.0224022	-0.334742	0.349886	0.241321	-0.267785									-0.224529	-0.312078	-0.0768702	0.00828272	0.158245	0.197985
-0.282301	0.482088	-0.00942714	0.0623121	-0.0779313	-0.336233									-0.255666	-0.0653913	0.291628	0.113828	0.341276	0.253995
-0.719591	0.262768	0.285414	-0.147675	0.0766548	0.0668503									-0.369207	0.22873	0.545376	-0.0793972	0.00707909	0.271926
-0.40285	0.200591	-0.527225	0.203337	0.535692	-0.510619									0.0722831	-0.189914	0.0245882	-0.364643	0.39105	0.0589153
0.063824	0.483099	0.450244	0.362753	0.0145484	-0.325561									-0.0317183	-0.151331	0.069663	0.263996	0.343641	0.253393
-0.140981	0.469212	-0.149241	-0.0651102	0.134572	-0.298924									0.366618	0.212901	-0.226291	0.213526	0.733965	0.41392
-0.281241	-0.0793914	-0.410944	0.113667	0.220804	-0.379648									-0.474566	-0.108059	0.0596184	0.00787454	0.293811	0.180976
-0.202775	0.0601662	0.184728	-0.00422444	0.266063	-0.354426									0.278679	-0.0670841	0.0757345	0.044389	0.585231	0.494017
0.170557	-0.277687	-0.208446	-0.252318	0.0270059	-0.520479									-0.284204	-0.231615	0.275927	-0.302571	0.440667	0.389947
0.325268	0.229805	0.653727	0.108127	0.166675	-0.0460723									-0.441732	0.491139	0.244082	0.166754	0.380431	0.549266
0.0407714	-0.00562218	-0.0543582	0.0739278	0.310212	-0.138068									-0.424274	-0.276363	0.379563	-0.0575428	0.0855596	0.315253
-0.479133	0.148632	0.164492	0.240673	0.444018	-0.288675									0.158437	0.119991	0.476419	-0.349493	0.583797	0.339509
0.06196	0.365622	0.614139	0.0451906	0.456878	-0.186389									-0.162251	0.606853	0.361401	-0.174059	0.467593	0.314795
-0.375057	0.518204	-0.184084	0.0233591	0.388724	-0.599905									-0.265909	-0.385515	-0.0266837	0.302791	0.541872	0.537724
-0.0787133	0.162779	0.280884	-0.288228	0.424902	-0.353114									-0.396975	0.308269	-0.199646	-0.380527	0.394047	0.654824
0.0280837	0.234957	0.396482	-0.226272	-0.0569551	-0.295119									-0.12246	-0.0484576	0.120506	0.378816	0.275828	0.385605
-0.128609	0.0169637	0.555161	0.140288	0.525919	-0.261725									-0.419968	-0.00900828	-0.0820699	0.368391	0.514194	0.307782
-0.43836	0.354713	-0.547364	0.276847	0.46934	-0.0403471									0.0862426	-0.277323	-0.105416	0.162674	0.519801	0.505497
-0.15105	0.147247	0.364869	0.197079	0.208492	-0.276377									0.274755	-0.269631	0.0769321	-0.0880354	0.278086	0.306552
-0.154085	-0.122649	-0.193637	-0.123415	0.43688	-0.551592									0.220626	-0.372987	0.0519634	0.628686	0.458107	0.0999411
0.656291	-0.13563	-0.0127728	0.46113	0.399324	-0.26073									-0.202854	-0.2305	0.0722606	-0.352534	0.682976	0.583464
-0.0159921	0.193987	-0.532799	0.490102	0.459285	0.00652597									-0.200001	-0.199864	0.189221	0.715459	0.458156	0.188589
0.0811788	0.528522	-0.450926	0.343327	0.0847402	-0.349673									-0.50265	-0.543869	-0.146114	-0.00218278	0.22812	0.150141
-0.412636	-0.049665	0.342387	0.0591617	0.076444	-0.384211									0.0423852	-0.177412	0.0598237	-0.08548	-0.0181817	0.172013
-0.0870219	0.624542	-0.38023	0.241067	0.527084	-0.281114									-0.311551	0.56937	-0.126164	-0.0877046	0.509158	0.352161
-0.0989371	0.398497	-0.0168751	-0.336593	0.442848	-0.517793									0.0311851	-0.192403	-0.186256	-0.0774053	0.0956762	0.314616
-0.265646	0.191664	-0.735361	0.187636	0.0819633	-0.340607									-0.230652	-0.358896	0.338903	0.135443	0.371757	0.228937
-0.491325	0.5651	0.460156	0.0501791	0.26242	-0.673997									-0.0486273	-0.353799	0.0641943	0.327721	0.599555	0.0645699
-0.143201	-0.124924	0.561503	0.0589762	0.0511011	-0.423161									0.396413	-0.19442	0.0341893	-0.121283	0.198494	0.389795
0.00875928	0.533933	-0.405568	-0.409685	0.299383	-0.0160468									-0.239821	0.16474	-0.447059	-0.226254	-0.00200263	0.307853
-0.402439	0.386269	-0.453222	-0.292596	0.0816229	-0.451476									-0.30717	-0.413553	0.258994	0.128728	0.26499	0.331903
-0.454615	-0.0353607	0.438769	0.103376	0.407974	-0.318128									-0.177363	-0.324367	-0.0910373	-0.33686	0.0318019	0.271091
-0.295533	-0.0131332	0.389319	-0.625036	0.0881384	-0.367704									0.19369	-0.115186	-0.133932	-0.1054	0.281	0.268735
0.0478827	-0.109558	-0.416344	-0.498682	0.383486	0.0202521									-0.108828	-0.237033	0.328841	0.467225	0.0914857	0.145634
-0.276501	0.508343	0.173778	-0.591406	0.22501	-0.26902									0.17598	-0.0688639	0.43722	0.515913	0.324052	-0.122463
-0.19094	0.164109	-0.0572039	0.00845474	0.234288	-0.042601									0.270734	0.135572	-0.172526	-0.0350539	0.598949	0.10561
-0.343585	-0.00199934	0.777785	-0.151794	0.0825169	-0.0126554									-0.407999	-0.256022	-0.197205	-0.193742	0.701445	0.026572
-0.173781	-0.17282	0.414672	-0.41908	0.0434945	0.0597913									0.053199	0.336049	-0.0147042	0.232215	0.559342	-0.160335
-0.175476	0.0569794	-0.311974	0.37666	0.37799	0.0524373									-0.0184734	-0.427896	-0.105926	-0.496628	0.0651013	0.315047
0.0443145	0.364153	0.525307	0.018843	0.120787	-0.23352									0.0449519	-0.0482511	-0.236017	0.67289	0.401694	0.510723
-0.0678784	0.170712	-0.426368	-0.250954	0.252777	-0.145388									-0.292931	0.335688	0.0101437	-0.0167633	0.426086	0.507153
-0.0374122	-0.500828	0.234853	-0.130986	0.226093	-0.00165051									-0.114881	0.041424	0.241628	-0.402233	0.204503	0.5902
0.27304	0.475396	-0.0750234	0.508853	0.50197	-0.183636									0.337966	-0.428029	0.0963422	-0.470239	0.222226	0.223121
-0.141284	0.18343	-0.355436	0.0131948	-0.303194	-0.271523									-0.102388	-0.370551	-0.215106	-0.484895	0.35052	0.386243
0.0727206	-0.0702683	-0.0998373	0.551624	0.309252	-0.381238									0.219249	-0.295609	0.266908	-0.19815	0.435124	0.393187
-0.319544	0.302504	0.451785	0.322226	0.291484	-0.32209									-0.508285	-0.192953	-0.229271	-0.0682157	0.328949	0.315453
-0.28531	-0.43278	-0.451965	0.358332	0.0886598	-0.406853									-0.447933	0.911587	0.032943	0.329355	0.363946	0.376293
-0.305967	-0.263199	-0.204167	0.150899	0.502318	-0.0504408									0.0290449	0.166256	0.311981	-0.454228	0.599968	0.577736
-0.0824393	0.182495	-0.412599	0.0310792	0.49419	-0.261687									-0.361503	0.0931528	-0.0444207	-0.140177	0.672445	0.416134
-0.337932	0.383011	-0.409688	-0.110289	0.518	-0.15208									-0.407887	-0.104207	-0.18037	-0.643011	0.114823	-0.00987055
-0.415579	0.0722199	-0.195922	0.415331	0.446983	-0.280595									-0.256675	-0.440069	0.263836	0.501812	0.363869	0.611225
-0.162376	0.297434	-0.891205	-0.0630024	0.373491	0.0133163									0.102247	0.295442	0.229465	0.298578	0.417406	0.431565
-0.176999	0.0112398	-0.0955903	0.192007	0.437217	-0.196825									0.0121562	-0.305258	-0.253075	0.167094	0.158115	0.422538
0.30406	0.0431293	0.0761818	0.184107	0.0882276	-0.418084									0.502477	-0.350191	-0.291623	-0.150038	-0.120407	0.315688
-0.0662793	0.074619	0.0516505	0.0557506	0.457981	-0.243716									-0.277996	-0.479441	-0.32838	-0.27167	0.247541	0.253564
-0.293728	0.115386	-0.0340068	0.624641	0.343259	-0.194788									0.265242	0.0421675	0.00656082	-0.360038	0.165377	0.771379
-0.234834	-0.133573	-0.0403248	0.254265	0.0140595	-0.257151									-0.172721	-0.379884	0.245957	0.730409	0.37235	0.480169
-0.280615	-0.179039	-0.368821	-0.126689	0.55175	-0.237886									-0.362844	-0.0563507	-0.362216	0.345549	0.317393	0.674898
-0.40861	0.193885	-0.0710353	-0.0115952	0.5464	-0.181421									-0.120083	0.47249	0.00458799	0.429694	0.0317127	0.179592
0.0948226	0.56843	0.232026	0.0034295	0.0642769	-0.502594									-0.384638	-0.215629	0.318101	-0.742027	0.472642	0.49764
0.411657	0.336845	-0.471945	0.334164	0.534438	-0.308171									-0.011793	0.711653	0.0840679	0.708539	0.390844	0.227754
-0.182774	-0.383264	-0.423433	0.0865679	0.00442315	-0.0189924									0.201686	-0.0301079	0.022429	-0.182223	0.345934	0.461675
-0.251845	-0.330287	-0.167751	-0.146175	0.0580999	-0.338861									-0.00848169	-0.459824	0.18308	0.801189	0.635562	0.209557
0.427096	0.0617686	-0.325688	0.131204	0.630726	-0.420085									-0.0135534	0.369397	0.230816	-0.248178	0.1925	0.475598
-0.314753	0.352971	-0.125946	0.222198	0.0686667	-0.0361997									0.400794	0.355482	0.149367	-0.113135	0.472679	0.498229
-0.296146	0.414517	-0.421816	0.169154	-0.0165082	-0.201465									0.528738	0.114437	-0.0338876	0.0802421	0.569138	0.15748
-0.612183	0.316821	-0.192477	0.323488	0.0735269	-0.0164154									-0.421339	-0.0400085	0.262042	-0.0929459	-0.0285976	0.270405
-0.150916	0.0890779	-0.35163	0.273905	0.171459	-0.0341438									0.442191	-0.154757	0.181331	0.245017	0.546965	0.260655
-0.741239	0.179982	0.207418	0.56661	0.349761	-0.31852									-0.112389	0.425238	0.261139	0.215751	0.371763	0.328439
-0.244238	0.401677	-0.0775468	0.14172	-0.0218947	-0.0675427									-0.12651	-0.199161	-0.299466	-0.0668121	0.362075	0.333499
-0.152277	0.384032	-0.241599	0.335337	-0.02477	-0.155169									-0.133771	-0.397386	0.158495	0.357264	0.00929326	0.199783
-0.266925	0.218635	-0.405174	0.400076	0.0274164	-0.224093									-0.103811	0.114659	-0.428637	0.224975	0.694856	0.419885
-0.0735423	0.280873	0.0626128	0.147533	0.354516	-0.172413									0.076289	0.467118	-0.0272547	0.119252	-0.0887583	0.565968
-0.303256	0.247867	-0.268508	0.410924	-0.286698	-0.210082									-0.116592	0.115383	-0.133589	-0.219528	0.288061	0.105123
-0.549922	0.172101	-0.201383	0.252645	0.028559	-0.257399									-0.073563	-0.173008	0.0901716	0.0221107	0.359683	-0.0859931
0.175451	0.203186	-0.25215	-0.142274	0.410702	-0.0950118									-0.0839323	-0.117918	-0.258307	0.58953	0.291126	0.504929
-0.297193	0.386406	0.0655367	0.332857	0.143085	-0.130062									-0.077209	0.171262	-0.256957	0.156487	0.362642	0.359954
0.0960215	-0.18501	-0.313401	0.209866	0.0587546	-0.275164									-0.193843	-0.188662	-0.0610424	-0.362922	-0.20745	0.268789
-0.375165	0.356018	0.352067	0.0427962	0.261991	-0.290691									-0.148974	0.254507	-0.179469	0.125033	0.472335	0.207404
0.0116637	0.164507	-0.322106	0.294966	0.190956	-0.205577									0.0958581	0.0418574	0.690968	-0.254944	0.213408	0.0647556
-0.0508285	0.654231	0.117867	0.624723	0.556235	-0.454948									-0.525445	-0.342046	0.117014	0.602131	0.443347	0.0980019
-0.259169	0.34626	-0.616351	0.178694	0.350818	-0.291381									-0.0038389	-0.474553	-0.0112479	-0.238219	0.334839	-0.0876177
-0.349916	0.511251	-0.256734	-0.505273	0.428226	-0.418104									-0.329145	-0.116216	0.582124	0.36181	0.313249	0.384975
-0.429568	0.400618	-0.092942	0.247993	0.258366	0.00192589									-0.275547	0.418282	-0.0339719	-0.0471838	0.394997	0.393856
-0.195685	0.0769465	-0.291644	0.308191	0.371711	-0.0135722									0.00805219	-0.476329	0.198264	-0.168057	-0.0799103	0.223752
0.0793577	0.290705	-0.46454	0.608826	0.119436	-0.0614249									0.0706921	-0.552249	-0.00496387	0.308728	0.14135	-0.152181
0.00150974	0.514501	-0.106273	-0.409248	0.023475	-0.188975									-0.0972479	-0.434819	0.698318	0.416781	0.463012	0.470104
-0.0319742	0.11493	-0.331753	0.0161777	0.187899	-0.150999									0.525979	0.222335	-0.0669015	0.443659	0.479293	0.646395
-0.557834	-0.231437	0.265904	-0.152739	0.267872	-0.200328									-0.421046	-0.234054	-0.0735585	0.338978	0.538607	0.508386
0.363318	0.155374	-0.317591	0.598866	0.15802	-0.128342									0.316796	-0.2012	-0.0822811	-0.139702	0.382446	0.637518
0.341332	0.207705	-0.470026	0.284651	0.150404	-0.296514									-0.00375926	-0.0405555	0.355686	0.0871631	0.272055	0.172867
-0.610849	0.152787	0.0816933	0.621266	0.595717	-0.292707									0.327774	-0.155225	0.216487	0.380308	0.402024	0.469868
-0.00129063	0.438201	-0.286176	0.470027	0.41812	-0.246019									-0.182297	0.0282812	-0.187272	0.0209023	0.300638	0.336034
-0.0895002	-0.0818891	0.155908	0.0488708	0.172446	-0.228371									0.298336	0.136508	-0.0542911	-0.00497598	0.0925342	0.390361
-0.053065	0.13947	-0.579115	0.296917	0.290845	-0.0194546									0.324133	0.0539011	0.0621585	-0.223065	0.291914	0.556868
-0.243345	-0.124805	-0.0782127	0.436778	-0.043404	-0.0277523									-0.581737	-0.325562	-0.366689	0.426327	0.605727	0.00458793
-0.415041	0.307459	0.0783365	0.386256	0.0543047	-0.0536593									-0.175029	0.127259	-0.0750141	-0.35155	0.430255	0.547227
0.496664	0.15577	0.0339247	0.585678	0.532368	-0.325857									-0.127057	-0.139012	-0.0798183	0.0892564	0.297402	-0.0537969
0.126355	-0.220738	-0.104088	-0.117194	0.532843	-0.618718									-0.396484	-0.3339	-0.318959	-0.0350303	0.414302	0.556335
-0.240765	0.455822	0.377867	0.397543	0.450826	-0.0970489									0.00480984	-0.0706334	-0.151432	-0.135757	0.568023	0.506466
0.163716	-0.27154	0.273256	0.187097	0.489137	-0.0335374									-0.190998	0.0252794	0.130277	-0.137804	0.353334	0.169476
-0.515464	-0.0883748	0.563266	0.211657	0.252567	-0.00840623									-0.0906263	-0.445855	0.121747	0.134756	0.127654	0.40635
-0.364039	0.441643	-0.173165	0.115649	-0.0484805	-0.323437									0.361187	0.570114	0.233629	-0.15908	0.619202	0.747883
-0.248852	0.422979	0.23908	0.105235	0.421401	-0.155252									-0.00667027	-0.0451785	0.330291	0.376074	0.119269	0.373937
-0.345025	0.139954	-0.0707499	0.35355	0.142096	-0.322035									-0.0674761	-0.406971	-0.0286062	0.238687	-0.185664	0.290977
0.074378	0.625957	-0.316423	0.481798	0.0691816	-0.182406									-0.0877675	-0.109161	0.129438	0.242274	0.199886	0.254905
-0.572387	0.224652	-0.364071	-0.171918	0.156112	-0.121645									0.673244	0.0852102	0.183143	-0.157585	0.236707	0.215343
-0.297433	0.457977	-0.0197471	-0.0191701	0.0190445	-0.193271									-0.188969	0.52064	-0.514931	0.327197	0.674542	0.535647
-0.370379	0.320561	0.438676	-0.0139372	0.0731651	-0.0910693									-0.0460614	-0.181406	-0.160157	-0.0753975	0.369371	0.437105
0.256481	0.296725	-0.125962	0.325741	0.0302973	-0.13615									-0.0734496	0.0374864	0.462453	0.226168	0.25436	-0.30176
0.371962	0.00753371	0.495217	0.607235	0.296492	-0.208013									-0.225807	0.120933	0.256062	-0.291471	0.29694	0.217836
-0.1376	0.281647	-0.173133	-0.233457	0.0935273	-0.0954747									-0.339284	-0.335703	0.429544	-0.184568	0.19807	-0.0223061
-0.332206	0.382197	0.144012	-0.440182	-0.228105	-0.27583									0.511662	-0.125609	0.130312	-0.127391	0.605122	0.483049
-0.131678	0.596868	0.0202289	0.039227	0.637755	-0.42447									-0.352159	-0.083055	-0.0640163	-0.0769809	0.288294	-0.156912
-0.497481	-0.000497689	-0.075148	-0.559101	0.36076	-0.160122									-0.227938	-0.221527	-0.513616	-0.294307	0.0792898	0.222297
0.122643	0.48805	-0.0596523	0.0535346	-0.244934	-0.0403052									-0.121637	0.0110334	-0.17338	-0.332955	0.0917596	0.319799
-0.134542	0.413739	0.231106	0.695236	0.305733	-0.206719									-0.342273	-0.141775	0.00721122	-0.434335	0.535502	0.0301805
-0.0804259	0.563202	-0.313498	0.131534	0.269679	-0.464098									-0.329906	0.0876637	0.314752	-0.287891	0.771721	0.0615251
-0.0652103	0.290275	0.669851	0.385224	0.258944	-0.123475									-0.146494	-0.297126	0.438822	0.649142	0.341031	0.570778
-0.204514	-0.509428	0.387733	0.0876676	0.482607	-0.504862									-0.129019	-0.249879	-0.119021	-0.0417778	-0.122082	0.347858
-0.229899	0.237788	-0.108103	0.574797	0.115976	-0.143471									0.445929	0.0307098	0.457735	-0.0685946	0.394164	0.189937
0.17157	0.468377	-0.254097	0.0476345	0.514003	-0.0248966									-0.377457	0.101096	-0.330867	0.466902	0.338274	0.371345
0.499614	0.442999	0.010038	-0.41052	0.386933	-0.469318									-0.15903	0.0933624	-0.354234	0.34954	0.242489	0.0868134
-0.519944	0.43685	0.3321	-0.548011	0.360896	-0.23196									-0.322301	0.203461	0.119474	0.0631581	0.348128	0.105888
-0.534789	0.358531	0.04806	0.0504993	0.649362	-0.516129									-0.119528	-0.20759	-0.360634	-0.259151	0.243417	0.219606
0.12633	0.590352	0.18253	-0.313854	0.280666	-0.392827									-0.224611	-0.249775	-0.263122	0.262103	0.349562	0.294547
-0.412977	0.306166	0.22308	0.388807	-0.0385136	-0.446496									-0.066943	-0.249454	0.253297	0.0886147	0.350032	0.231707
-0.651431	0.41064	-0.386019	0.020018	0.280477	-0.424079									0.292382	0.0924519	0.113274	0.635519	0.131441	-0.0398579
-0.0311706	0.21199	-0.227224	-0.149691	0.160444	-0.389767									-0.113472	0.0640576	0.696542	-0.287959	0.309656	0.0253441
-0.0451234	0.249658	-0.300182	0.212744	-0.0459912	-0.408629									-0.289571	-0.134881	-0.373204	-0.221374	0.311158	0.451481
0.393823	0.385889	-0.0530543	0.291328	-0.0197402	-0.196833									-0.390401	-0.292393	0.0776304	0.231453	-0.0658134	0.265388
0.137181	0.567432	0.036115	-0.0571063	-0.0916366	-0.337863									0.369633	0.110008	0.0244461	0.319727	0.398787	0.476606
-0.546792	-0.0151314	-0.363721	-0.0364244	-0.0870492	-0.373378									0.00434171	0.327197	-0.110845	0.352888	0.648517	0.0223296
-0.213602	0.660823	-0.0451392	-0.174379	0.442616	-0.305701									-0.070177	0.558769	0.157269	0.354466	0.531459	0.543422
-0.189205	0.188706	-0.219483	0.184658	0.331317	-0.554863									-0.00489273	0.302643	-0.360944	0.0337209	0.603736	-0.0710482
-0.147787	-0.219859	-0.429126	0.0148046	-0.0184669	-0.657802									-0.23091	-0.0664284	0.415515	-0.0533279	0.229661	0.413237
0.115854	0.13077	-0.145907	-0.681934	0.15625	-0.228943									-0.0784052	-0.273178	0.0589714	0.172422	0.166935	0.589843
-0.08602	0.471209	0.668112	-0.268998	0.299173	-0.225449									-0.277061	0.648587	0.306558	0.367055	0.268704	0.253174
-0.540575	0.538247	0.168238	-0.212758	0.0698276	-0.489115									-0.201669	-0.435606	-0.276339	0.556954	0.347256	0.310075
-0.427973	0.376561	0.0552011	-0.232914	-0.0233104	-0.349563									-0.385172	0.353747	0.39337	-0.253941	0.545062	0.680058
-0.222409	0.197248	-0.15174	0.191864	0.0110044	0.0415795									-0.189698	-0.419682	0.34324	0.243458	0.219301	0.440737
-0.122639	0.11696	0.369785	0.362587	0.0107123	0.163734									-0.18738	-0.0734821	0.576293	-0.178859	0.396373	0.331676
0.28709	0.232207	0.0548344	-0.677693	-0.0789054	-0.451375									-0.200479	0.0712814	0.629831	-0.034001	0.181303	0.292263
-0.309182	-0.498903	0.0219413	0.579579	0.0974382	-0.0702744									-0.261948	-0.180396	0.270184	-0.393553	0.328829	0.368628
-0.181615	0.637911	-0.268197	0.524769	0.538418	-0.45475									0.172502	-0.0500129	0.20609	-0.185963	0.301387	0.374859
0.24369	0.346399	-0.070664	0.422881	0.41843	-0.645344									-0.271843	-0.292388	0.202749	-0.0999051	0.0463398	0.391939
0.412867	0.566562	-0.184766	0.356526	0.0699411	-0.329077									0.0319564	-0.113592	0.297758	-0.361246	-0.036164	0.642498
-0.200424	0.15229	0.420627	0.465171	0.206782	0.119411									0.782188	-0.238632	-0.12527	-0.0859817	0.245147	0.120726
-0.318821	0.469351	-0.456979	0.570129	0.491252	-0.365539									-0.258052	-0.0493592	-0.185687	-0.236178	-0.00540583	0.124513
-0.319303	0.416392	-0.188381	0.537581	0.294622	-0.0549126									0.0545301	0.118935	0.0632203	-0.062412	0.249594	0.606987
0.189292	0.189728	-0.214637	0.537452	-0.0164768	-0.0366105									-0.241341	0.189324	-0.000476274	-0.14483	0.0927193	0.482915
-0.40742	-0.302955	-0.0343635	0.51729	0.137477	-0.524085									-0.132733	-0.212884	0.361512	-0.102417	0.416103	0.288828
-0.313212	-0.0488338	0.236691	0.590667	0.478779	0.0581719									-0.0612404	-0.107064	0.229802	0.0423887	0.231168	0.150427
0.235619	0.42942	-0.453702	0.360504	0.11858	-0.169285									-0.127338	0.438226	-0.0683779	0.0274465	0.622937	-0.0571781
-0.356693	0.184594	-0.390921	0.36574	-0.324416	-0.160446									0.35541	-0.477099	0.0225446	-0.058003	0.351218	0.423871
-0.264378	0.366449	-0.357522	-0.360073	-0.439272	-0.177615									-0.328369	-0.385015	0.0425219	0.685683	0.0180525	0.56002
-0.459347	0.122471	0.104408	0.303168	0.250398	-0.382915									0.729519	-0.316178	-0.075845	0.100296	0.53214	-0.0613677
-0.140947	0.695419	-0.24622	-0.112255	0.324105	0.0219433									0.0254639	-0.046565	-0.0736414	0.185913	0.577668	0.398079
-0.363632	0.669489	-0.0954457	0.554464	-0.0833123	-0.285662									-0.316466	-0.429334	-0.0661667	-0.20235	0.038003	0.291717
-0.30576	0.417845	-0.40563	0.604098	0.512285	-0.10367									-0.0292215	0.0102751	-0.00520141	0.24849	-0.0908426	0.115698
-0.238588	0.596367	-0.017554	0.586852	0.173713	-0.100074									-0.28733	-0.243177	-0.281557	0.374705	0.471111	0.147831
-0.173888	0.42951	-0.0640514	0.626208	0.11192	-0.032191									-0.184366	-0.203603	-0.0583692	0.0957227	-0.0505183	0.309736
-0.0189539	0.386276	-0.746906	0.741684	-0.0170315	-0.529309									0.0829596	-0.729161	-0.222126	0.221201	0.40921	0.445622
-0.0611283	0.50249	0.090732	0.447448	0.0582814	-0.521174									-0.202452	-0.20277	-0.0582108	0.103112	0.465798	0.272035
-0.15665	0.697557	-0.0486125	0.304814	0.083871	0.0113297									-0.144045	-0.398036	-0.275895	0.694219	0.187599	0.170615
-0.168295	0.320361	-0.0879793	0.268196	0.286323	-0.106458									0.0969815	0.246191	0.016814	0.182502	0.345517	0.379327
-0.0596355	0.308722	0.602945	-0.328915	0.423412	-0.356075									0.01304	-0.309865	0.189445	0.585501	0.500367	0.495906
0.0287253	0.241307	-0.240755	-0.604594	0.687446	-0.302515									0.101656	0.302914	-0.216016	0.544434	0.560074	0.277471
0.197498	0.23338	-0.0743976	0.612769	-0.0458022	-0.279122									-0.234124	0.518584	-0.204746	0.718496	0.401564	0.408527
-0.195607	0.409626	0.151926	0.290412	0.174122	-0.146433									-0.17958	0.532961	0.0639909	0.500379	0.22891	0.489421
-0.189729	0.322136	-0.133598	0.56813	0.238874	-0.328965									-0.123057	-0.322362	0.202463	0.673326	0.509889	0.554887
-0.05978	0.192972	-0.452452	0.738583	0.369258	-0.172774									-0.270035	-0.232397	0.159897	0.0553692	0.366865	0.498315
0.0807614	0.384111	-0.384917	0.681135	0.170106	-0.205006									-0.314515	-0.111262	-0.20865	0.330952	0.0997677	0.0152807
-0.250472	0.0923608	0.249419	0.59472	-0.149639	-0.00891069									-0.0964008	0.0914782	-0.0663346	-0.179297	-0.0232897	0.0887361
-0.199377	-0.461807	0.100099	0.722314	0.327503	-0.0435745									-0.133306	0.307697	0.125365	0.348387	0.350955	0.0848447
-0.0270528	0.433566	-0.651709	0.357372	-0.121762	-0.179619									0.622491	0.14362	0.6198	-0.183149	0.572435	0.304551
-0.248419	0.303176	-0.132295	0.319573	0.417945	-0.254274									-0.294711	-0.180754	0.101618	-0.0139143	0.426342	0.186635
-0.274583	0.476581	-0.0206323	0.34239	0.0257034	-0.45683									-0.116834	-0.335681	0.143505	0.0351208	0.387834	0.231338
-0.186657	0.240586	-0.21302	-0.146218	-0.0960685	0.00547342									-0.156265	-0.148055	0.593675	0.25175	0.0646981	0.393302
0.0034823	0.0583879	-0.0139106	0.064847	0.418469	-0.518161									-0.285846	-0.173298	-0.17313	-0.0797416	0.63455	0.534143
-0.177963	-0.180638	-0.146735	0.565648	0.155439	-0.276399									-0.393895	-0.349051	-0.134436	0.201195	0.328369	0.535172
-0.672794	0.0711024	0.0221266	-0.0701896	0.248186	-0.787586									-0.288895	0.52523	0.0967172	0.196505	0.0722707	0.21327
-0.0600704	-0.355813	-0.221912	0.63241	-0.0969976	-0.59337									-0.397028	0.574216	0.00620752	0.275846	0.748581	0.341738
-0.320111	-0.172775	-0.661893	0.415361	-0.0893891	-0.711979									-0.293759	0.222172	0.242247	0.0781996	0.371651	0.0245706
-0.0198474	0.00585969	-0.339444	-0.119634	0.48293	-0.166458									-0.368422	-0.100571	0.510822	-0.288841	0.454132	0.358526
-0.344254	0.141455	-0.553411	0.462442	-0.102832	-0.238348									-0.15392	0.390278	-0.571124	-0.323359	0.308553	0.420402
-0.216818	0.641671	-0.31758	0.0136201	0.326592	-0.361882									-0.463949	-0.222352	0.0772189	0.0983109	0.501716	0.574682
-0.10336	-0.448344	-0.248692	-0.119412	0.413141	-0.448614									-0.310045	0.2408	-0.325782	-0.0654058	0.377942	0.751186
-0.349518	0.0533298	-0.222561	-0.555145	0.221989	-0.377453									-0.296444	-0.257635	-0.0840261	0.633395	0.323142	0.368668
-0.027712	0.336433	0.0953814	-0.0362785	0.65992	-0.411283									-0.328751	0.0181089	0.126365	0.272384	0.0954101	0.273075
0.336267	0.44078	-0.369026	0.0337792	-0.0443287	-0.478593									-0.229152	-0.100597	-0.0533324	-0.0968351	0.620461	0.213652
-0.201467	0.0705484	-0.067074	0.046975	0.355852	-0.0762362									-0.123904	0.102023	-0.0616944	-0.248076	0.324333	0.639371
0.00487827	-0.661615	0.141905	-0.0960399	-0.154592	-0.352375									0.171989	0.286756	0.206898	0.366015	0.285333	0.0641535
0.272348	-0.0276835	0.236634	0.0144226	0.0181466	-0.34331									0.0459813	-0.0661792	0.0965852	0.0176527	0.729394	0.468072
0.520976	0.180357	-0.0964275	-0.236395	-0.126896	-0.168013									0.392802	0.0721966	-0.0129653	-0.35897	0.556673	0.49321
-0.43467	0.333121	-0.123062	-0.543541	0.411906	-0.372477									-0.108499	-0.0793832	-0.387617	0.360241	-0.0322029	0.475093
0.397562	-0.0629966	0.328381	0.644049	-0.202779	-0.456284									-0.287594	0.0280112	0.433518	-0.00244357	0.00804162	0.403454
-0.0524246	0.33984	0.596037	-0.0043937	-0.163521	-0.276065									-0.353103	0.0452458	-0.18769	0.682624	0.212678	0.204589
-0.506326	0.142152	-0.0740031	0.515433	0.504827	-0.462751									0.408915	0.495456	0.230555	-0.284233	0.166294	0.893137
-0.749438	0.313662	-0.338563	0.109185	0.0642413	-0.577906									-0.26315	-0.258897	0.493993	0.115244	0.115118	0.814266
-0.0233623	0.350046	-0.616611	-0.071832	-0.032579	-0.380427									-0.328547	-0.0121533	0.19413	0.577411	-0.0250821	0.562018
-0.568179	-0.14538	-0.0853313	-0.0240505	0.326001	-0.302034									0.069984	0.203333	0.623199	0.380638	0.474659	0.465085
0.0144197	0.372547	-0.166845	0.331203	-0.0529394	-0.582347									0.259155	0.588834	0.5902	0.42796	0.347614	0.531877
-0.483266	0.413688	-0.19627	0.172214	-0.0603621	-0.201051									-0.240081	-0.318006	0.169212	-0.20397	0.0307558	-0.176088
0.100279	-0.0747453	-0.274313	-0.204126	0.197914	-0.52732									-0.357315	-0.337733	-0.0405628	0.177655	0.440344	0.371468
-0.345487	-0.0316008	-0.0933486	-0.817502	0.205317	-0.435357									0.463072	0.130144	0.718015	-0.105477	0.0734323	0.46238
-0.345832	-0.438923	0.0244733	-0.467727	0.0490821	-0.443474									-0.0173406	-0.0190194	0.67297	-0.0921314	0.523362	-0.222707
-0.678293	0.0658427	0.265759	0.602435	0.388205	-0.176588									0.429238	-0.134272	-0.158108	-0.375747	0.515328	-0.0455719
-0.373178	0.165759	-0.228096	-0.1164	0.231505	-0.660205									0.204608	-0.017848	-0.141155	-0.337302	0.894945	0.0354776
-0.604273	0.137866	-0.153119	0.513218	0.438149	-0.119467									-0.384027	-0.256384	-0.34255	-0.701331	0.544633	0.578249
-0.175222	-0.259606	0.396054	0.369035	0.413852	-0.207776									0.00757417	-0.261317	0.11472	0.807752	0.361407	0.202898
-0.403823	-0.370372	0.254733	-0.197499	-0.151132	-0.100338									-0.384537	0.0450419	0.642425	-0.165292	0.270279	0.116984
-0.594539	0.424139	-0.162001	-0.0930667	0.483502	-0.3136									-0.284927	-0.440546	0.728759	-0.301491	0.577449	0.281242
-0.40496	0.149732	-0.223185	0.29183	0.447116	-0.48464									0.209798	0.342872	0.556232	0.110275	0.370233	0.0546614
-0.0218006	0.443481	0.176346	0.0376786	0.554926	-0.0414311									0.551752	0.173255	0.182342	0.571945	0.168204	0.420084
-0.57849	0.527854	-0.308785	0.228548	0.232505	-0.357899									0.141001	-0.308908	0.293929	0.544152	0.251356	0.388404
-0.307976	0.361058	-0.436244	-0.602555	0.498032	-0.538971									-0.124787	-0.166396	-0.488645	0.399815	0.94806	0.330144
-0.344054	-0.219913	-0.329958	0.282477	0.459353	0.000657184									-0.439316	-0.352737	-0.206063	-0.0757159	0.222481	0.423234
-0.204453	0.141039	0.0339237	-0.625052	0.2839	-0.284002									0.00696266	-0.281912	0.22554	0.0681749	0.253477	0.368727
-0.171	-0.24337	-0.13528	-0.130756	0.709825	-0.585347									-0.509508	0.246447	0.127367	-0.346943	0.578884	0.235469
-0.746967	0.112454	-0.260113	0.490347	-0.33248	-0.165776									-0.0393651	0.544576	0.40032	0.196018	0.0652253	0.305016
-0.134062	0.300031	-0.0766359	0.441493	0.667472	-0.372807									0.201717	-0.146767	0.451921	-0.113547	0.366483	0.356302
-0.746371	-0.0515826	-0.382691	-0.112969	0.573284	-0.403914									-0.176426	-0.391671	-0.301319	0.20653	0.614644	0.492507
0.0465143	0.200491	0.322486	0.0794899	0.190057	-0.394164									0.0787401	-0.125206	0.427942	0.743328	0.110301	0.209445
-0.416698	-0.161157	0.407412	-0.135253	0.575748	-0.603352									-0.214365	0.340888	0.128971	0.635903	0.633398	0.330174
-0.120411	0.148357	-0.289692	0.351435	0.477374	-0.334954									-0.303426	-0.0252091	0.11729	0.156406	0.325127	0.747275
-0.459973	0.617303	0.298333	0.342351	-0.105873	-0.343055									-0.193605	-0.493106	-0.136144	-0.146439	0.48326	0.323767
-0.0674394	0.297583	-0.125293	0.315568	0.250306	-0.381538									-0.159029	-0.0867136	-0.0632625	0.197465	0.764132	0.326914
-0.484737	-0.0859613	-0.292233	0.231119	-0.13133	-0.373721									-0.131538	0.216266	-0.36472	0.148103	0.189138	0.267905
0.170794	0.167066	-0.0886158	0.428534	0.313365	-0.328716									-0.655553	0.0667348	0.0942539	0.683703	0.4624	0.274303
-0.499338	0.190003	0.437695	0.145408	0.554459	-0.422038									0.488425	0.368444	0.599395	-0.248171	0.598241	0.142947
-0.0258309	0.252629	0.179418	0.525812	0.345423	-0.362498									-0.108373	-0.332849	0.635018	0.243644	0.317451	0.258583
-0.249721	0.0644759	-0.303575	-0.0724269	0.530449	-0.011456									-0.137011	-0.0453576	-0.339918	0.651265	0.282132	0.43192
-0.214325	0.279535	-0.540064	-0.0389395	0.207784	-0.185647									-0.0553409	-0.334421	-0.0418432	0.0732418	0.743417	0.0986877
0.182369	0.0442403	-0.0808786	-0.181417	0.39878	-0.27978									-0.147655	-0.171402	0.518528	-0.171696	0.31256	0.342992
-0.224435	0.0953766	-0.0487879	0.278391	0.490916	-0.435407									0.253585	-0.0860116	-0.172301	0.789898	-0.00501389	0.217261
0.355889	0.164308	-0.228926	0.0848026	0.243088	-0.354878									-0.128631	-0.387762	0.331424	-0.240718	0.635657	0.858621
-0.181909	0.268016	-0.20874	0.288506	0.501775	-0.586748									-0.180979	-0.357591	-0.386394	0.861817	0.254495	0.346502
0.184573	0.370895	-0.0988819	-0.136353	0.6579	0.0872937									0.144961	-0.589237	0.275433	0.767519	0.658041	0.320598
-0.354026	0.266942	0.225018	0.349524	0.193454	-0.316023									-0.382972	-0.314286	-0.328141	0.694697	0.72047	0.236536
0.00687011	0.437366	-0.17247	0.0838903	-0.0153243	-0.486586									-0.195925	-0.0077701	-0.00605011	-0.247357	0.287751	0.49905
-0.437869	0.406342	-0.485565	0.351919	0.11513	-0.344504									-0.199888	0.0757959	0.408157	-0.256397	0.20716	-0.0797436
-0.152941	-0.00606046	0.326824	-0.457016	0.567088	-0.585797									0.0800687	0.0738868	0.32879	0.202995	0.45466	0.00689541
-0.498748	0.341703	0.139682	-0.151958	0.590818	-0.12272									-0.127815	-0.447482	0.656203	-0.301693	0.724168	0.575873
-0.123144	0.429455	-0.260444	0.409109	-0.25205	0.476584									-0.207722	0.18032	-0.0839481	0.6784	0.517738	0.444407
-0.213011	0.741338	0.00670452	0.474635	0.139848	-0.188856									0.514742	-0.208181	-0.0134091	-0.205115	0.880532	0.449794
0.326759	0.282563	0.171106	0.718087	0.638452	-0.503642									0.553085	-0.263858	0.384622	0.620751	0.439868	0.455248
-0.334668	0.203918	-0.648829	0.327246	0.304545	-0.101475									0.224509	-0.0779181	0.444077	-0.0563018	0.432346	0.372216
0.373869	0.290429	-0.36992	0.359576	0.0608926	-0.253395									0.204112	-0.0950969	0.0266635	0.390019	0.118844	0.310956
-0.287608	-0.132561	-0.270531	0.209924	0.424117	-0.0830034									0.201396	-0.230769	0.00920095	0.417989	0.648003	0.502473
-0.0177273	-0.416881	0.327668	0.329164	0.655875	-0.0401581									-0.00814108	0.0397674	0.519173	-0.322971	0.560954	0.533875
-0.701098	-0.0667015	0.139483	0.0741106	0.000196694	-0.177617									0.357457	-0.34543	-0.531972	0.411668	0.796401	0.38426
-0.0202248	0.00290271	-0.127971	0.440947	0.370763	-0.240793									-0.464883	0.469431	0.0425906	-0.117016	0.505168	0.557522
-0.0755984	0.0899155	0.264092	0.528341	0.435528	-0.575503									-0.190486	-0.241921	-0.233953	-0.00356008	-0.061485	0.0105168
-0.164149	0.245169	-0.281196	0.0569344	-0.115905	-0.0520338									-0.105509	-0.633146	0.618788	-0.0962121	0.316982	0.30691
-0.000128285	0.0859686	-0.050221	0.465751	0.641057	-0.666427									-0.207429	-0.165404	-0.0852643	-0.155264	-0.0930617	0.0706614
-0.396644	0.077848	-0.0435182	-0.425399	0.569845	-0.355694									-0.301317	-0.0909104	0.402359	-0.117281	0.524708	0.168326
0.613309	0.326862	-0.369909	0.0340159	0.0626316	-0.116035									-0.288176	-0.169803	-0.252161	-0.0536668	0.784149	0.485076
0.0438259	0.11754	-0.155372	0.220803	0.624277	-0.0912647									-0.428474	-0.167085	0.219424	0.65674	0.572064	0.577447
-0.408282	-0.313058	-0.298892	0.239448	0.381616	-0.465109									0.0199627	-0.10885	0.337553	-0.0455041	0.0620203	0.166976
-0.109265	-0.475295	0.469966	0.683155	0.0667377	-0.199981									-0.175329	-0.365471	-0.264566	0.514402	0.223795	0.177734
-0.116777	0.0663781	-0.0203652	0.263924	0.768911	0.0195881									-0.248115	0.226203	0.288476	-0.526992	0.234328	0.289066
-0.119847	0.0915087	-0.017757	0.629809	0.0291526	-0.186015									-0.401126	0.370561	0.368158	-0.0242071	-0.184938	0.266416
-0.242884	-0.0735914	-0.563575	-0.0989198	0.102254	-0.451969									-0.191779	-0.0663657	-0.197671	-0.0667372	0.0528846	0.464932
0.211478	0.00304508	0.194466	0.644441	0.326228	0.168485									0.15468	-0.263263	0.594621	0.227445	0.518061	0.50723
0.0107242	0.244083	-0.328628	-0.509668	0.134336	-0.0204088									-0.00367857	-0.0189927	0.49185	0.403592	0.343853	-0.146008
-0.173888	0.185501	0.502538	0.318654	0.445848	-0.3507									-0.557914	-0.305729	0.153691	-0.154794	0.353651	0.297764
0.0087265	0.116789	-0.304333	0.608707	0.24661	-0.378444									0.157673	-0.266171	-0.313603	0.42756	0.434846	0.131178
0.233163	0.458131	-0.0943502	0.0134573	0.0501982	0.0471073									-0.0997632	0.283539	0.236855	0.624008	0.00279653	0.115761
-0.19969	0.133982	-0.0988788	0.069697	0.25412	-0.411085									-0.488922	-0.481822	0.654574	0.292127	0.323959	0.580381
0.068483	-0.0703811	0.109302	-0.0314696	-0.0937136	-0.332785									-0.0368824	-0.16652	0.588364	-0.034032	-0.0181945	0.358302
0.179835	-0.486986	-0.323443	0.368072	0.125945	-0.248989									-0.353184	-0.166476	0.155533	0.318483	-0.0338472	-0.44938
-0.238657	0.387494	-0.0173086	-0.0707946	0.507681	-0.221814									-0.456082	-0.44032	0.522034	0.29767	0.300636	0.237494
0.0320392	-0.0903678	-0.0223756	0.357531	0.522954	-0.368882									-0.0284984	-0.384865	0.846618	0.586367	0.135285	0.316423
-0.3381	0.309083	0.0672169	-0.305468	0.460027	-0.308039									-0.216186	0.578873	0.463934	-0.10877	0.0563962	0.105383
0.0366189	0.464321	-0.127879	-0.129684	0.0454619	-0.157833									-0.263243	-0.0872948	0.864039	-0.165011	0.122483	0.233035
0.00053927	-0.041584	0.148191	0.20696	0.192486	-0.273717									-0.13994	0.137565	0.155456	-0.273773	0.0402801	0.0881117
-0.0505495	0.000149601	-0.278596	-0.223966	0.11754	-0.408668									-0.0308616	-0.171466	0.00905576	-0.222197	0.00211104	-0.000564495
-0.0426849	0.304464	-0.134914	0.727104	0.23095	0.158513									-0.366223	-0.598179	0.254587	0.260876	0.278162	-0.012274
0.22769	0.50068	0.390129	-0.603203	0.444022	-0.259037									-0.0625118	0.576489	0.12752	-0.00597755	0.342941	0.46627
-0.254344	-0.223727	-0.248283	0.259995	0.283543	-0.470302									0.0146229	-0.389119	-0.064546	-0.178998	0.183523	-0.0781743
-0.4666	0.353837	-0.0244558	0.0938057	0.0176064	-0.496612									-0.217684	-0.183775	0.0521632	-0.0864178	0.0139524	0.083603
-0.000918337	0.00424696	-0.493594	0.62582	0.44376	-0.542222									-0.0616356	0.697305	0.158844	0.260713	-0.00337025	0.196134
-0.316297	0.326367	-0.234481	-0.35442	0.0717151	-0.358605									0.249981	-0.28897	0.322749	-0.0632245	0.427929	0.234508
0.0140267	0.320645	0.501262	-0.0517203	0.0923545	-0.487502									-0.427047	-0.121255	0.0554366	0.076077	0.295429	0.296767
0.456721	0.502151	0.320272	-0.213777	0.0628109	-0.0443612									0.783204	-0.296147	0.181052	0.542764	0.492393	0.0398088
-0.0891085	-0.0347232	0.024606	0.19573	-0.0141972	0.127474									0.112296	-0.3079	0.3446	-0.275467	0.524146	0.555842
0.270221	0.518678	-0.333023	-0.510121	0.258274	-0.413651									0.247522	-0.262212	0.378719	0.130103	0.0775351	0.189121
-0.392406	-0.0377927	-0.632107	-0.338752	0.0790052	-0.289979									0.171427	-0.0822843	-0.0893579	0.647522	0.133261	-0.00809138
-0.390847	0.369522	0.209808	0.381546	-0.0343963	-0.0699572									-0.282997	-0.242883	0.616305	0.104245	0.217819	0.146777
-0.0892367	0.0777896	-0.200418	-0.0475713	-0.046891	-0.399401									-0.169081	-0.314765	0.596343	0.592946	0.429811	0.219518
-0.0488675	0.413727	-0.348819	0.646131	-0.274426	-0.284928									-0.121422	-0.133998	0.637281	-0.0150014	0.37459	0.263701
0.138595	-0.0677481	0.375526	0.406549	0.159139	-0.421121									-0.228437	-0.352306	0.282404	0.51887	0.0733658	0.241038
-0.059652	0.307251	-0.177866	0.369293	0.515831	-0.0838926									-0.0952927	-0.129018	0.170415	0.583036	0.431161	0.149448
0.0687807	-0.227828	-0.33915	-0.221437	0.0578104	-0.0132146									0.182699	0.106483	0.652397	-0.15241	-0.0265838	0.294055
-0.21298	0.493116	-0.569166	0.040702	0.0555569	0.00265867									-0.129223	-0.23146	0.0458108	0.18186	0.113875	0.337203
-0.262375	-0.412397	-0.331865	0.31005	-0.257075	-0.175585									-0.0602313	-0.380269	0.360606	-0.0147901	0.214225	0.263176
-0.117027	-0.0384164	-0.3088	0.733585	0.374242	-0.163713									-0.226591	-0.342476	0.294099	0.339701	0.347222	0.602033
-0.360737	0.0273874	-0.0112689	-0.0207864	-0.324084	-0.329896									-0.497449	-0.0454036	0.212931	-0.332859	0.190582	0.480208
-0.0839641	0.245471	0.0133028	0.391998	0.379046	-0.0102377									-0.290362	-0.426136	0.529073	0.583746	0.246926	0.220822
-0.0946093	0.151454	-0.795193	-0.0295991	-0.0481855	-0.0411808									0.026024	0.146655	0.394633	-0.40449	0.28636	0.211997
-0.31243	0.399866	-0.49509	0.66076	0.205429	-0.329511									0.331806	-0.0585111	0.245489	0.425522	0.125778	0.0438116
-0.337781	0.31001	-0.243677	0.361754	0.202203	-0.0427971									0.192638	-0.478041	0.0879471	0.465011	-0.0814416	0.533796
-0.176604	-0.0671645	-0.0875454	0.449408	0.047343	-0.257156									-0.628284	-0.382473	0.419649	-0.3359	0.126368	0.0649208
0.00640679	0.0628921	-0.19899	0.65151	0.111269	-0.264918									0.191354	-0.305796	0.114547	-0.193436	-0.104774	0.460774
-0.115988	0.299347	-0.215904	0.26448	0.551244	-0.373818									0.0914734	-0.0635315	0.0898901	0.535309	0.136947	0.481111
-0.342807	0.0667289	-0.0987993	-0.0247987	0.0846993	-0.270992									-0.0802747	-0.436262	0.0818662	0.350326	-0.0282873	0.0796075
0.18273	0.335062	-0.147943	0.0345805	0.02011	-0.0800017									-0.366449	-0.291214	-0.151837	-0.177684	0.216454	0.497261
-0.253777	0.328159	-0.451576	0.320313	0.519544	0.241957									-0.360396	0.00902196	0.443577	-0.059612	0.0218154	0.376405
-0.130196	0.127921	-0.137651	0.112625	0.194272	-0.0815864									-0.140514	0.160632	-0.0957136	0.514063	-0.229088	0.442576
-0.0452636	0.129594	-0.461868	0.379598	-0.186509	-0.131497									-0.530308	-0.100568	0.0411655	0.684363	-0.0596132	0.420489
-0.385721	0.190089	0.065711	0.0950176	0.0932952	-0.500449									-0.433008	0.014395	0.582992	-0.39157	-0.107599	0.157236
-0.0775992	0.260416	-0.371933	0.159922	0.0175988	-0.438344									-0.369042	-0.0828716	0.581605	0.108315	0.357461	0.559778
-0.0983708	0.539051	-0.254294	0.131346	-0.0175429	-0.415471									0.0303918	-0.0650063	-0.121271	0.0962876	0.395967	0.30718
-0.093105	0.408972	0.177198	0.149967	0.241613	-0.01454									-0.0743195	0.13129	-0.336419	-0.150086	0.336394	0.320259
-0.292746	0.0253164	-0.33797	0.403684	-0.0796202	-0.316697									-0.307189	0.484446	0.0956869	0.230369	-0.0199704	0.688488
-0.456601	0.645964	0.488922	0.210955	0.268971	-0.204099									-0.363616	0.396505	0.468712	0.366836	0.506776	0.288083
-0.214022	0.563688	-0.43996	0.200878	0.45346	-0.136566									-0.408487	0.0438609	0.558043	-0.459567	0.180451	0.467192
-0.0397532	0.231271	-0.392519	0.398836	0.454593	-0.204499									0.295214	0.115563	0.240843	-0.137554	-0.0211081	0.493169
-0.470211	0.399145	-0.3874	0.407497	-0.206863	-0.284723									-0.0849341	0.422543	0.600275	0.171888	0.155407	0.642377
-0.429054	0.41425	0.0311077	0.282828	0.615288	-0.0932094									-0.10192	-0.371466	-0.354332	0.304344	0.0536168	0.412142
-0.249072	-0.123186	0.283773	0.602431	0.592963	-0.101513									-0.319213	0.433565	0.0388398	0.463298	0.513425	0.095586
-0.51042	0.664547	-0.508489	0.442059	0.316583	-0.47919									-0.335686	-0.212638	0.0680731	-0.213723	0.249928	0.325614
-0.320285	0.276691	-0.211364	0.401075	0.41224	0.0348391									-0.131681	-0.0264922	0.0218975	0.393402	0.242085	0.0411021
-0.00590113	0.215518	-0.257542	0.0512319	-0.0606013	-0.47874									0.274468	-0.384607	-0.360269	0.0533572	-0.050723	0.108754
-0.615994	0.511343	0.124206	0.551092	0.198259	-0.0924428									-0.15176	-0.0294757	-0.29601	-0.23221	-0.0319498	0.212851
-0.283023	0.249205	-0.10186	-0.17087	0.0135839	-0.245649									-0.239178	-0.398864	0.0549011	0.0810467	0.353202	-0.0255458
-0.315848	0.350897	0.175658	0.141244	0.423532	-0.176775									-0.378582	0.130241	0.547846	-0.177063	0.136638	0.463087
-0.578762	-0.0351047	-0.030924	0.544018	0.0193844	-0.513682									-0.316536	-0.125596	0.331019	0.403085	0.0969579	0.552809
-0.355319	0.178265	-0.512966	0.830383	0.0452409	-0.133385									-0.210974	-0.0146192	0.40224	0.327605	0.0326704	0.690665
-0.370873	-0.138427	0.104473	0.308688	0.495938	-0.280814									0.00459624	-0.26001	-0.218941	0.130073	0.361686	0.419449
-0.470243	0.14123	0.0153073	-0.045385	0.578765	-0.433247									-0.152121	0.0326971	0.55775	-0.103278	0.129468	0.174779
-0.123541	0.377822	0.115082	0.718216	0.05854	-0.021116									-0.212724	-0.138446	0.481876	-0.00897932	0.0857288	0.769439
-0.0907725	0.036801	0.571826	0.284672	0.0805894	-0.220026									-0.23866	0.322334	-0.128691	0.51258	0.0226122	0.429598
0.00976407	0.18103	0.0934865	0.321926	0.20398	-0.390047									-0.133123	0.240193	0.520994	0.383923	0.120979	0.512657
0.306463	-0.216036	-0.0959074	-0.0499663	0.311948	-0.472821									-0.206166	0.699333	0.0521093	-0.202844	0.258173	-0.203565
0.313565	0.59886	-0.00564745	-0.106762	-0.00831615	-0.594623									-0.0555441	-0.172392	0.306654	0.466155	0.183269	0.630244
-0.128059	0.539231	-0.256646	0.42977	-0.171298	-0.272284									-0.00643945	-0.37878	0.213552	0.521428	0.396698	0.479172
-0.428425	0.478641	-0.465805	0.585787	-0.198773	-0.416587									0.0667344	-0.149838	0.558009	-0.217356	0.00919034	0.496512
0.0363513	-0.351253	-0.0714026	0.127936	0.299875	-0.195344									-0.0111933	0.14	0.107183	0.709887	-0.105779	0.107168
-0.328411	0.133642	-0.0270526	-0.409769	0.261325	-0.228274									-0.0964838	0.417974	0.40776	-0.265033	0.00802777	0.303589
-0.435239	0.161353	0.0329186	-0.246996	0.00818954	-0.229828									-0.243037	-0.311864	0.588901	0.171071	0.0952719	0.845043
0.397117	-0.0959442	0.0570076	0.263532	0.258707	-0.485522									-0.363695	-0.169128	-0.110361	-0.155058	0.127773	0.586858
-0.611799	0.425214	-0.359357	0.410434	0.531	-0.456322									-0.364231	0.00716257	0.559642	0.577507	0.244491	0.286982
-0.224341	0.201204	-0.120514	-0.156487	0.137135	-0.0377831									-0.241655	0.189074	0.474981	0.0298001	0.294738	0.0546839
-0.226994	0.01957	-0.297282	-0.232919	0.154171	0.0413481									-0.321842	0.219793	0.332489	-0.100905	0.0265159	0.204727
-0.236625	-0.422995	-0.113456	0.238333	0.661802	-0.294185									-0.0685961	-0.243267	0.241397	0.0571284	0.0262958	0.101734
-0.266699	-0.0332773	-0.409094	0.275232	-0.0538845	-0.575148									-0.154392	-0.423274	-0.207308	0.210909	0.348921	0.235512
-0.357394	0.252573	-0.28689	0.226432	0.0446907	-0.128981									0.00541929	-0.020989	-0.0982779	-0.0172276	-0.157867	0.331695
-0.283799	0.354283	0.609133	0.0925296	0.340072	-0.489963									-0.254825	-0.126832	-0.50516	0.56778	0.327898	0.584907
-0.274017	0.318202	-0.0680216	0.704914	-0.0584749	-0.627468									-0.0409233	-0.0633424	0.081495	-0.272492	0.146011	0.290762
-0.200893	0.255483	-0.317508	0.343064	-0.10583	-0.0781814									-0.0645951	0.687152	-0.182935	-0.338921	-0.238081	0.413676
-0.287597	0.119796	-0.349281	0.21315	0.309965	-0.396034									-0.441867	0.48398	-0.586255	-0.0231203	0.284183	0.658049
0.266064	-0.046009	-0.0801651	0.713447	0.250495	-0.477891									-0.125342	0.104117	-0.00202866	-0.100077	0.251346	0.44013
-0.0826824	-0.661983	0.0262834	-0.240137	0.37349	-0.0919051									-0.238408	0.0923339	0.332002	0.0380631	0.318069	0.476255
-0.387547	-0.143328	-0.0219746	0.485214	0.276464	-0.588577									-0.558546	-0.389441	0.2425	0.26255	0.349442	0.578896
-0.30351	0.121735	-0.0824827	0.392594	0.395139	-0.307484									-0.186396	0.000788693	0.197411	-0.0589829	0.258555	0.49435
0.00631879	0.173489	-0.190976	0.0938463	-0.145697	-0.246035									-0.19587	0.478129	0.463824	-0.149415	0.246926	0.482754
3.73994e-05	0.120821	0.0746933	0.200445	0.240868	-0.312718									-0.251444	0.262463	0.180791	0.122014	-0.0588188	0.336167
-0.373773	0.0426209	0.0666564	-0.767852	0.391	0.0899783									-0.300647	0.122566	0.00473838	0.408453	0.332771	0.532631
-0.210872	-0.0404542	0.171509	0.116638	0.230339	-0.414036									-0.46284	-0.267267	-0.314571	0.13327	0.501337	0.224063
0.00462226	0.3647	0.681644	0.542622	0.34694	-0.344535									-0.381126	0.0462788	-0.0439763	-0.219147	0.246903	0.313242
-0.425565	0.230497	-0.125765	0.248038	0.0416666	-0.284204									-0.266775	0.237373	0.107455	-0.0567293	0.325452	0.511539
-0.140388	0.0966294	0.274582	0.136221	-0.0134034	-0.239393									-0.195111	0.273339	-0.158572	-0.417378	0.600993	0.397168
-0.309155	0.0292733	-0.556083	0.462385	0.166275	-0.479943									-0.0599442	0.318002	-0.0261062	0.42545	0.0413991	0.472601
0.115978	0.276869	-0.455931	0.322079	-0.108454	-0.487521									0.00386767	0.123154	0.145538	-0.183826	0.730215	-0.0461683
0.211047	0.550428	-0.480441	0.668701	0.323101	-0.45543									-0.483483	-0.0329914	0.097745	-0.357354	0.504065	0.0690567
-0.313587	0.174207	-0.258064	0.0421845	0.348879	-0.606932									-0.0029646	-0.272041	0.103879	-0.021271	0.328191	0.271939
0.0120738	0.11838	-0.28934	-0.248509	0.0372663	-0.342081									-0.204828	0.165137	0.269696	0.669183	0.438538	0.421223
0.173066	-0.299853	-0.530427	0.305957	-0.0198818	0.0130858									0.296973	0.367981	-0.0731604	-0.59896	0.0824781	0.0694189
-0.192814	0.241023	0.49045	0.564431	0.499094	-0.55787									-0.179965	-0.0901225	0.03063	-0.557503	0.338603	0.46599
0.056928	-0.192573	0.611507	0.355038	0.423592	-0.413411									-0.201567	0.0121998	0.119111	0.563905	0.365721	0.236222
-0.150631	0.526257	-0.0771863	0.450197	0.516663	-0.382234									-0.0159725	-0.153076	-0.292162	-0.475352	0.29417	0.0525976
0.0783094	0.0451197	-0.288786	0.070007	0.705537	-0.322642									-0.285724	0.144126	0.427046	0.0688808	-0.0219236	0.310542
-0.357163	0.202157	-0.391179	0.182816	-0.0863056	-0.523409									0.241806	-0.233806	-0.3059	-0.235004	0.614274	-0.260177
-0.114821	-0.156069	0.0647816	0.0624706	0.719722	-0.408945									-0.165435	0.160266	0.104777	0.0508312	0.349409	0.440566
-0.20711	-0.322832	0.328792	0.328398	0.136077	-0.0640915									-0.0497447	0.406055	0.359206	-0.168485	0.0212467	0.356293
-0.559253	-0.00347576	-0.446443	0.497307	0.116596	-0.343154									-0.0933296	-0.160461	-0.112785	0.553448	0.0928056	0.206968
-0.534433	-0.145662	-0.0241213	-0.519828	-0.0164184	-0.372514									-0.248835	-0.437992	-0.146576	-0.433636	0.316336	0.219216
-0.275311	0.0959406	-0.2544	0.145409	-0.112434	-0.0999052									0.330247	-0.587244	0.0524311	-0.136853	0.347983	0.0251842
0.0802788	-0.0562217	0.505789	0.475489	0.080565	-0.114151									-0.314691	0.276849	-0.00466347	0.122933	0.0726382	0.0524261
-0.228786	0.256867	-0.0951095	0.224992	0.385466	-0.482611									-0.261132	0.330288	0.501066	-0.045425	0.542997	0.142665
-0.00165196	-0.0299334	0.567669	0.432128	0.386566	-0.0417068									-0.0462501	-0.401929	-0.130106	-0.146686	-0.0449898	0.557261
-0.151382	0.0142174	-0.185854	0.251677	-0.00443233	-0.0099093									-0.270463	-0.108261	0.497024	-0.172176	0.560397	0.555874
-0.20426	0.360975	-0.0730599	0.216692	0.140895	-0.107931									-0.0747758	-0.268841	0.09342	0.019427	-0.123239	0.460302
-0.336586	0.142045	0.335372	0.645801	0.0110466	0.00655831									0.465983	0.297483	-0.268264	-0.430442	0.221037	0.192417
-0.153351	0.360322	-0.182928	0.327534	0.461582	-0.102647									-0.210845	0.208921	0.507872	0.207132	0.302601	0.572871
-0.224545	-0.0452771	0.25028	-0.0677831	0.358861	-0.297292									-0.156467	-0.209533	-0.0878743	-0.0615678	0.352991	-0.174834
-0.377097	-0.173557	-0.0449311	0.0577799	0.139387	-0.472662									-0.27822	-0.507211	0.424541	0.0840918	0.0227796	0.563386
-0.251915	0.155	-0.180878	0.215922	0.168877	-0.46515									-0.282537	0.307033	0.392886	-0.115963	0.120464	0.484942
-0.216531	0.456652	0.105347	-0.0164639	0.115483	-0.568667									-0.0551638	-0.478753	0.202113	-0.22456	0.340816	0.407561
-0.585458	-0.01393	-0.345025	-0.0587718	0.159583	-0.3077									-0.128276	0.0596061	0.33547	0.259629	0.12353	0.653927
-0.103317	0.196477	-0.628543	0.32929	0.602	-0.322408									0.437946	-0.260617	-0.462813	0.247453	-0.18054	-0.0240143
-0.190357	0.494611	0.609706	-0.474707	0.481189	-0.308205									0.121468	0.175251	0.398004	-0.32867	0.272446	0.161636
-0.28043	0.191433	-0.633771	-0.415237	-0.00805725	-0.200818									0.384664	-0.268922	0.563737	-0.168498	0.319533	0.257714
-0.0874487	0.436936	0.255363	0.208026	0.351911	-0.304138									-0.183853	0.115838	0.346153	-0.148527	0.236452	-0.141303
-0.232974	0.000291918	-0.369118	0.261882	0.0382775	-0.194021									-0.101521	-0.507917	0.111852	-0.252886	0.640314	0.554682
-0.489896	-0.240547	-0.331886	-0.0208787	0.231738	-0.337365									0.0636379	-0.160714	0.423038	0.275232	0.391204	0.720743
-0.122833	0.324715	-0.320706	-0.162388	-0.0896848	-0.61708									-0.284908	-0.0790049	0.16042	0.677977	0.0222969	0.342911
0.592411	0.139612	0.315164	-0.111672	-0.0612157	-0.285195									-0.0470899	0.290152	0.362345	0.497372	0.460217	0.698872
-0.146919	0.0239228	-0.0520446	0.0074325	0.28998	-0.420079									-0.167669	-0.138319	-0.185574	-0.0165018	-0.00865697	0.502876
-0.0896226	0.168122	-0.0308138	-0.048053	0.457888	-0.368532									-0.226824	0.0453609	0.1055	0.137347	-0.0173236	-0.091417
-0.204977	0.632668	-0.0142567	0.560091	-0.28193	-0.141466									-0.390248	0.202186	-0.327634	-0.201546	0.342764	0.67033
-0.208009	0.0521644	-0.200477	-0.257379	0.109557	0.0133701									0.263486	-0.191213	0.409571	0.257848	0.498584	0.271728
-0.156659	0.604244	-0.452592	-0.281543	0.0611252	-0.0635708									-0.354742	-0.454358	0.457225	-0.200838	0.353748	0.44346
-0.367761	0.269245	-0.0114609	0.0369073	0.156868	-0.536972									-0.25207	-0.282241	-0.00922589	-0.224545	0.18514	0.0310853
-0.126966	0.0816582	-0.119375	-0.44233	0.329995	-0.475951									-0.186566	0.298643	-0.297024	0.575604	0.349995	-0.10733
-0.0544654	0.261253	0.167442	-0.172541	0.572288	-0.34798									0.141516	0.6177	0.316343	0.246825	0.399229	0.674728
-0.135665	0.370681	-0.069298	0.399259	0.258027	0.322352									-0.0471173	0.0312967	-0.35205	0.720075	0.069442	0.141299
-0.367612	0.328888	0.0345333	0.348388	0.393043	-0.151417									-0.200396	-0.390832	0.448804	-0.00127298	0.29244	0.461981
-0.204182	0.322113	-0.0605087	0.264725	-0.21443	-0.300622									0.0154921	0.0101564	0.289796	0.492406	0.451624	0.452759
0.197291	-0.324079	0.109014	0.523394	0.116194	-0.424052									-0.647826	-0.0666412	0.409979	-0.0523369	-0.0386247	-0.0926831
-0.162745	0.261561	0.0497154	-0.334577	0.443752	-0.148864									-0.389983	0.439572	0.265581	-0.0160506	0.353972	0.228762
-0.0785578	0.153204	0.0492601	0.110439	0.531269	-0.0314908									0.296568	-0.282363	-0.151474	-0.0344572	-0.0457867	0.198613
0.232482	-0.0256597	-0.080892	0.452222	0.464387	-0.526396									0.540033	0.489919	0.389447	-0.13025	0.187286	-0.0194298
-0.109734	0.0642111	-0.020722	0.437772	0.538895	-0.488376									-0.284088	-0.0857564	0.420292	-0.0946008	0.339375	0.442746
0.154776	-0.208279	0.0853366	0.376843	0.438432	-0.123067									-0.246864	0.0291249	-0.00180817	-0.0633593	0.257084	0.295159
-0.237701	0.255607	0.205316	-0.0492227	0.330488	-0.453319									0.615909	0.0100555	0.29315	-0.0707654	0.0457841	0.192406
0.0208988	0.272607	-0.0886555	0.43539	0.068907	-0.340801									-0.180925	-0.321281	0.291888	0.762203	0.203833	0.493842
-0.383041	0.466955	0.0952401	0.146492	0.325412	-0.0153686									-0.327331	-0.145833	0.302735	0.0543002	0.176381	-0.0889914
-0.655774	-0.258788	-0.0621108	-0.244206	0.618024	-0.414562									-0.182026	-0.172734	-0.232364	-0.00422978	0.135449	0.447973
-0.201256	0.309316	0.339404	0.252739	0.123586	-0.296151									-0.0547657	0.0361733	0.0966823	-0.0382263	0.0591863	0.231306
-0.288439	-0.300643	-0.0284396	0.361309	0.29045	-0.24385									0.28759	-0.150244	-0.588974	-0.556672	0.413022	-0.267655
-0.423692	0.361176	-0.214069	0.550092	0.207521	-0.564									-0.283878	-0.318212	0.475087	0.669968	0.312557	-0.0164553
-0.232701	-0.0891324	0.0813178	0.0373019	-0.0288613	-0.286918									0.265099	0.0504787	-0.417189	-0.207907	0.376504	0.594203
-0.0820448	-0.587982	0.151738	0.208627	0.417018	0.050973									-0.0715074	-0.129952	0.273989	0.555768	0.351885	-0.021593
-0.249765	0.304645	-0.336795	0.604025	0.373413	-0.322769									-0.0184398	0.100011	0.0267222	0.569834	0.569963	0.362147
-0.0764325	0.341691	-0.28844	0.105365	0.426632	-0.0663368									-0.240138	-0.112099	-0.198296	0.800822	0.0131401	0.00787243
0.121638	0.250812	-0.20224	-0.208319	0.0731905	0.0670064									0.48953	-0.0971525	0.0341289	-0.161462	0.119721	0.302875
-0.2493	0.0504779	-0.250218	0.499634	0.204209	-0.381058									-0.476971	-0.311898	-0.0585611	-0.297915	-0.0342907	0.518367
-0.265523	0.0157152	0.0523341	-0.399458	0.524766	-0.147984									0.547806	0.0854741	-0.0109606	0.443051	0.492314	0.316922
-0.133661	0.65683	0.374192	0.696444	0.622363	-0.386205									-0.277684	0.202078	-0.254802	0.120246	-0.00992058	0.720285
-0.390456	-0.196345	-0.226022	-0.116181	-0.20002	-0.152752									-0.407893	-0.310353	0.0229217	-0.0466069	0.103764	0.1019
-0.251159	0.0961555	0.636317	-0.127212	0.384043	0.222126									-0.295429	-0.0788865	-0.254335	0.35309	0.259246	0.0793848
-0.459666	0.330233	0.113963	-0.244136	-0.168522	-0.341877									0.0433495	-0.219875	-0.463725	0.0395192	0.504719	0.25587
-0.203159	-0.145908	0.550228	0.370507	0.0434387	-0.24682									-0.229141	0.121686	0.0201159	0.532982	0.520284	0.403173
0.0061886	0.0626745	-0.114299	-0.722414	0.341446	-0.17387									-0.316694	-0.320691	0.305291	0.596435	0.00577454	0.126353
0.0877136	0.266873	-0.0433679	-0.0281651	0.324026	-0.369629									-0.0496221	0.103518	-0.307725	0.0449921	-0.217539	0.0771871
-0.0856763	0.231523	-0.0120522	-0.475111	0.288862	-0.0267534									0.274679	-0.103583	-0.444198	0.149378	0.0225698	0.332009
-0.377923	0.0501243	0.262413	0.448889	0.294028	-0.249334									-0.119748	-0.223038	0.587132	-0.101823	0.0613799	0.151306
0.0353129	0.122655	-0.273594	-0.498934	-0.0434092	-0.298002									-0.165344	-0.0450926	0.0615111	-0.230311	0.537875	0.20528
-0.28847	0.688034	-0.139421	0.417165	0.268473	-0.218271									-0.384287	-0.0554638	-0.239351	-0.370444	0.593772	0.227502
-0.399613	0.0348644	0.253777	0.00433872	0.668595	-0.308663									-0.0576895	0.00090483	-0.258353	0.107041	0.212921	0.0980107
0.0191778	0.191495	-0.0671709	0.474612	0.0871471	-0.162614									-0.138207	0.362169	0.00807079	-0.0495855	0.271024	0.551573
-0.223608	0.335932	0.480422	0.455311	0.27941	-0.17453									-0.00183863	0.0493124	0.721476	0.106112	0.219512	0.358921
-0.184292	-0.132939	0.0839408	-0.101632	0.379896	-0.0447368									0.0490282	-0.134383	-0.0713139	-0.126733	0.167265	0.272842
-0.418392	0.378555	-0.486615	0.52548	0.272552	-0.146641									0.411642	0.231509	-0.0941523	-0.330467	0.161236	0.0795817
-0.161081	0.629038	0.309354	-0.0184945	0.581441	-0.0569652									-0.190082	-0.0671102	0.361136	-0.272181	0.564539	0.190258
-0.537338	-0.0850626	0.124466	0.272643	-0.075987	-0.307973									-0.27897	-0.0653844	0.0667739	0.00280062	0.0260268	0.368413
-0.194178	0.619191	0.383176	0.48054	-0.0134451	-0.171462									-0.259299	-0.485824	0.0759139	0.00706366	0.0557504	0.339311
-0.217895	0.0193696	0.109202	-0.254761	0.302061	-0.379431									0.294117	-0.0553774	-0.144615	0.535863	0.254356	0.142305
-0.47836	0.376528	-0.67743	-0.0403759	0.0517738	-0.2456									0.130062	0.0313027	0.481237	-0.362841	0.106319	0.346577
0.0309805	0.242029	0.072211	-0.0718536	0.443198	-0.0313635									0.0747259	-0.0558429	0.01106	-0.156546	0.354126	0.259275
-0.503349	0.183031	-0.100235	-0.45011	0.363304	-0.113915									0.0650802	0.108662	0.0852954	-0.163796	0.0831838	0.351598
-0.411972	0.376203	-0.180053	0.104317	0.413062	-0.352221									-0.120022	0.32908	-0.288522	-0.278055	0.324105	0.175517
-0.408288	0.47357	0.550785	0.0914863	0.573675	-0.0506505									0.301726	-0.151689	-0.19226	-0.069309	0.246379	-0.0136545
-0.491903	0.520583	-0.171053	0.317856	0.068428	-0.171388									0.467486	-0.11887	0.383394	-0.402643	0.196621	0.331032
-0.177379	0.294817	0.363255	0.225093	0.189257	-0.250084									0.385846	0.0280127	-0.262565	0.587188	0.299194	0.577075
-0.268902	-0.135574	-0.145507	0.623978	-0.0677003	-0.29842									-0.293306	-0.0802485	0.128444	0.152311	0.0735299	0.340324
-0.309461	0.305412	-0.146723	0.357593	0.343952	-0.00376397									-0.26891	-0.491648	-0.229077	-0.20262	0.689896	0.318605
-0.203019	0.389584	-0.624832	-0.522241	0.296232	-0.351077									-0.529618	0.162868	-0.205804	0.118274	0.117134	0.0241128
-0.311195	-0.126173	0.134553	-0.248869	0.568127	-0.0820148									-0.286778	0.552518	-0.142487	-0.126541	0.268059	0.150662
-0.176111	0.312321	0.373925	0.262461	0.499164	-0.12408									0.066988	0.0200006	-0.363269	0.0630972	0.212668	0.363005
-0.350926	0.0290583	-0.365845	0.273555	0.415868	-0.344058									0.299637	0.437993	-0.208026	0.252316	0.339917	-0.0651927
-0.195956	0.215976	-0.286861	0.660765	0.337638	-0.214411									-0.581706	0.24629	-0.028839	0.514585	0.311385	-0.014356
-0.241154	0.22731	-0.0328171	-0.00790693	0.425071	-0.0253077									0.180341	0.0619442	-0.0499745	-0.0795806	0.141455	0.0168741
0.874316	0.520949	0.0272095	-0.209798	-0.016486	-0.244518									-0.233443	0.246814	0.0991319	0.243447	0.162061	0.283954
-0.0733718	0.538962	-0.390426	0.55829	0.471335	-0.0750621									-0.195648	0.342862	-0.0188822	-0.0486406	0.188401	0.398051
0.236208	0.353941	-0.20438	0.164701	0.325488	-0.431675									-0.191368	0.333795	-0.133248	-0.143902	0.600047	0.0181167
-0.0967567	0.473129	-0.173966	0.301027	0.458126	-0.309223									-0.296117	0.0125683	0.139833	-0.0921352	0.186909	0.413344
-0.128386	0.562159	-0.144088	0.350242	-0.212152	-0.049313									-0.0953069	0.0439877	-0.305622	0.423731	0.574646	0.37958
-0.166521	0.598594	-0.141726	-0.14563	0.0617731	-0.163971									-0.0462043	0.0255833	-0.373555	0.280682	0.0552522	0.166698
-0.0512948	0.330017	-0.527904	0.570005	0.0847555	0.128615									0.125201	-0.191823	0.371431	0.67714	0.504048	0.165087
-0.431613	0.61873	-0.327654	0.383001	0.386964	-0.0409385									-0.141798	-0.238936	-0.0204872	0.2621	0.0583649	0.155723
-0.201382	0.661467	0.642351	-0.0448745	0.382082	-0.401766									-0.0441033	-0.162403	-0.345493	0.392138	0.415562	0.229244
-0.225272	0.673915	-0.216669	-0.258018	0.229569	-0.668995									-0.139561	0.353864	0.104998	0.695725	0.293389	-0.0396002
-0.275697	0.194369	-0.360403	-0.426302	0.368728	-0.372942									-0.124969	-0.316626	0.205418	0.229395	-0.133381	0.230152
-0.574821	0.509999	0.282784	-0.154525	0.232958	-0.224767									-0.0943379	-0.0246775	0.212608	0.165662	0.270462	0.236159
-0.289783	-0.469876	-0.106907	-0.061702	-0.119594	0.0114747									-0.0645362	0.274342	0.0164302	-0.319005	0.238947	0.345719
-0.355263	0.5385	-0.0706319	0.056554	0.166825	-0.417003									-0.258898	-0.266376	-0.0714532	-0.0719063	0.320335	0.105307
-0.165106	0.672387	-0.211391	-0.122227	-0.0105158	-0.141184									-0.229428	-0.421076	0.412509	-0.236936	0.520631	0.0140465
-0.0255251	0.50424	-0.265257	0.658696	0.510966	-0.420605									0.111137	-0.323289	-0.220717	0.67939	0.269031	0.12543
-0.0916784	0.749239	-0.151689	0.311457	0.279477	-0.485526									-0.0992967	-0.187213	0.393237	-0.17388	0.0115442	0.303613
0.0597154	0.554984	0.00198968	0.233471	0.219209	-0.270124									-0.0537495	0.329465	-0.0274179	0.178155	-0.0609464	0.256721
-0.168565	0.128027	-0.099967	0.0573583	0.596002	-0.185014									0.509427	0.266865	-0.113901	-0.800563	0.0894552	0.238426
-0.104531	0.481283	0.343251	0.545128	-0.0411497	-0.383738									-0.178111	0.153414	-0.0815007	0.0340152	0.278591	0.0021969
-0.526	0.0668636	-0.435631	0.301032	0.0759718	-0.0749475									-0.0693314	-0.0834936	-0.297567	0.0537419	0.0105729	0.463468
-0.0820882	0.521468	-0.184196	0.36641	0.248669	-0.0913692									0.130683	-0.0403877	0.310019	-0.0408417	0.389579	0.208305
0.0236227	0.117465	-0.166229	-0.0933628	-0.0832228	-0.193082									0.352382	-0.312232	0.548401	-0.12363	0.407608	0.378113
-0.482997	0.331688	0.639312	0.0980109	0.700708	-0.361827									-0.252852	-0.346725	-0.387825	-0.0552416	0.037895	0.828662
0.0919268	0.406622	0.675048	-0.164937	0.153022	-0.502025									0.11218	0.531628	0.217627	-0.0345525	0.114535	0.337244
0.278388	0.286976	-0.490358	0.441445	0.110783	-0.601726									-0.124572	-0.384021	-0.130603	0.0335842	0.308423	-0.143836
-0.0793621	0.452816	-0.731876	0.704777	0.551772	0.140783									-0.297789	-0.0389717	-0.192402	0.350459	0.339915	0.237272
-0.464331	0.157791	0.311291	0.0695199	0.0180007	-0.072756									-0.335943	-0.224222	0.247364	0.542622	0.46854	-0.0325201
0.34614	0.197086	-0.228303	0.522867	0.148759	-0.120894									-0.0732653	-0.315087	-0.0280267	-0.0736672	0.310883	0.595476
0.0594797	-0.30672	0.296702	0.185071	0.166346	-0.399536									0.197069	-0.26625	0.260331	-0.0643044	0.306955	0.0615712
-0.574799	0.167418	0.315514	0.261349	0.25352	-0.530143									-0.119233	-0.0613837	-0.354362	0.206267	0.481391	0.120949
-0.416176	0.446233	-0.480589	0.524634	0.0221609	-0.00687655									-0.190451	-0.366512	0.0517722	-0.246881	0.429479	0.122389
-0.414847	0.310677	0.419637	0.545685	-0.180386	-0.282405									0.218691	-0.0724918	0.580301	0.224575	0.283238	0.174664
0.228937	0.131161	-0.220059	0.809546	0.174654	-0.616112									-0.365117	-0.0140862	0.392851	-0.088028	0.322983	0.252182
-0.180487	0.78111	-0.37989	0.378162	-0.0666567	-0.192416									-0.151972	-0.245628	0.103022	0.343097	0.273997	0.313725
-0.400935	0.44031	-0.338713	0.651334	0.274907	-0.207926									-0.0558723	0.0416525	0.493256	-0.0666038	0.50392	0.386007
-0.474756	-0.0672184	0.0852891	0.730023	0.445634	-0.547809									0.47072	0.245816	0.553532	0.490937	0.0296407	0.251121
-0.206659	0.458687	0.402846	0.11573	0.500867	-0.656789									-0.0104083	-0.293489	0.282864	0.356247	-0.0174992	0.314434
-0.104328	0.0743808	-0.103344	0.44806	0.16123	-0.384393									-0.243114	-0.450711	0.603725	0.16586	0.620259	0.147644
-0.125235	0.509682	-0.337895	0.592264	-0.279174	-0.316258									-0.0859848	-0.0342129	0.404025	0.744843	0.0135745	0.600982
-0.0460703	0.00639584	0.537576	-0.180521	0.453241	-0.32751									0.360263	0.490138	-0.222568	0.241898	-0.00835881	0.0278056
-0.263091	-0.296107	0.757669	0.158015	0.310179	-0.30506									-0.206879	0.152769	0.180141	0.141203	0.336062	0.187248
-0.280422	0.0986061	0.641363	0.450528	-0.0362161	-0.48477									-0.200327	-0.388361	0.258776	0.0603655	0.0250184	0.192805
-0.232207	0.644705	0.646224	-0.0704218	0.193765	0.231991									-0.289655	0.134466	0.161944	0.19484	0.110517	0.111563
-0.0300303	0.331881	-0.0730184	0.396506	0.187881	-0.157491									-0.59851	0.204349	0.182549	0.258105	0.314948	0.0963666
-0.170151	0.608499	-0.411583	0.621939	0.149453	-0.241582									-0.272543	-0.0820536	0.577186	0.37699	0.127753	0.355439
-0.00646598	-0.0285366	0.0309196	0.463317	0.516252	0.0225094									-0.200053	0.199062	0.609829	0.201397	0.171059	0.0610379
-0.105878	-0.345709	-0.33357	0.419114	0.0605114	-0.411451									-0.177428	0.702512	0.314341	0.301118	0.305291	0.514877
-0.0804927	0.636318	-0.0223237	0.413055	0.449167	-0.319178									-0.0022297	-0.33884	0.310239	-0.0388427	0.417399	0.180967
0.0635814	0.60361	-0.0194031	0.192098	0.319133	0.38184									-0.259341	-0.124365	0.493215	0.401027	0.437953	0.638581
0.0144028	-0.114244	-0.111514	0.382698	0.542319	-0.213552									-0.0361434	-0.290123	-0.389398	0.10488	0.0636155	-0.0926627
-0.405018	0.268981	-0.352441	0.460473	0.316816	-0.471117									-0.316932	-0.164467	0.0131702	0.450057	0.137614	0.329176
-0.187424	0.0168775	-0.0440942	0.505823	0.241627	-0.237587									-0.00856718	-0.18324	0.633228	-0.241885	0.305626	0.171535
-0.236543	0.622657	-0.324574	0.324231	0.392805	-0.467727									-0.141	0.160107	-0.154653	-0.0469308	0.00806048	0.278957
-0.0342822	0.124623	0.63072	0.341883	0.305489	-0.248041									-0.391918	-0.241407	0.0626969	0.015064	0.484707	0.33443
-0.292768	0.0577959	0.674816	0.19271	0.635057	-0.0286344									-0.28443	0.630733	0.624847	0.174143	-0.00118594	0.330652
-0.223061	0.743487	-0.314806	-0.262355	0.116092	-0.377499									-0.165957	0.0353048	0.0342103	-0.477651	0.304868	-0.0671064
-0.608548	0.275768	0.289605	0.495496	0.039767	-0.604095									-0.359596	0.277072	0.445091	0.0265512	0.388821	0.306501
-0.019383	-0.40496	0.504689	0.497832	0.639644	-0.317075									-0.154204	0.256415	0.34016	0.0171257	0.38294	0.205414
-0.473054	0.463849	-0.00397096	0.354247	0.26786	-0.038975									-0.184218	0.1457	-0.316167	0.131067	0.0399663	0.415032
0.375337	0.468528	0.143451	0.380679	0.42089	-0.0814589									-0.0243635	0.32319	0.159714	-0.106937	-0.196591	0.136844
0.0657231	0.20323	0.0680399	0.412134	0.392719	-0.348551									-0.103184	-0.708573	-0.210016	0.591267	-0.0373704	0.363323
-0.250034	0.100932	0.207102	0.738651	0.363601	-0.389076									-0.247198	-0.367065	0.779835	-0.582586	0.180907	0.249372
-0.321178	0.292771	0.0948925	0.14085	0.697416	-0.127739									0.522528	0.0338833	-0.308736	0.130323	-0.318594	-0.0117205
-0.105052	0.281321	-0.196227	0.157247	0.249604	-0.168288									-0.231912	0.33264	0.577884	0.587834	0.497289	0.0391868
-0.122221	0.257829	0.0305093	0.426056	0.256058	-0.039477									-0.371637	0.0674134	0.31992	-0.039105	0.267084	-0.00576947
0.151196	0.0946679	-0.0471358	0.504193	0.444024	-0.220831									-0.392018	0.134724	0.100838	0.0742713	0.346842	0.453292
-0.310504	0.152272	-0.332517	0.148443	0.34282	-0.397093									-0.280173	-0.337509	0.0798078	-0.130747	0.200513	0.289481
0.0232043	0.169446	-0.358095	0.511145	0.36852	-0.309915									-0.17971	-0.19043	0.0106935	-0.302332	0.512437	-0.0941644
-0.228742	0.0441905	-0.305038	0.6259	0.35107	-0.022414									-0.597309	-0.242213	-0.146292	-0.3044	0.24615	0.255778
-0.0231396	0.0804805	-0.18678	0.513217	0.0227711	0.0422203									-0.443473	0.297069	0.761525	-0.434158	0.281065	0.340693
-0.459514	0.25137	0.425062	0.650854	0.475554	-0.424097									-0.427532	-0.0659	-0.230184	0.00787182	0.451199	0.22056
-0.295441	-0.026532	0.0707184	0.653526	0.35321	-0.317101									-0.217438	0.0114336	0.442855	0.583927	0.468296	0.438396
-0.343224	0.212586	-0.689065	0.152101	0.0313004	-0.428428									-0.292319	-0.690439	-0.0958313	0.0453064	-0.0381334	-0.294809
-0.0335703	0.337291	-0.514646	-0.143507	0.497417	-0.155097									-0.422579	-0.0103927	0.119134	-0.0622774	0.343234	0.021475
-0.0841385	-0.0578096	-0.0165631	0.717782	0.00543806	-0.458668									-0.535684	-0.196153	0.0272919	-0.334633	-0.051862	0.260407
-0.535923	0.220678	-0.0562176	0.25219	0.464265	-0.163674									-0.610738	-0.316446	-0.189411	0.444451	0.469613	0.382819
0.00710634	0.514629	0.26585	0.529074	0.14741	-0.415546									-0.0710372	-0.161179	0.0431199	-0.255609	0.392045	0.256135
-0.628702	-0.0138818	-0.45233	0.0945786	0.0614408	0.0913493									-0.312729	-0.527379	0.165242	0.366884	0.44799	0.571372
-0.319102	0.129152	0.270828	0.474034	0.408124	-0.560216									-0.200162	-0.087229	-0.521191	0.0637199	0.362606	-0.051879
0.14582	-0.209904	-0.355082	-0.517604	0.270932	-0.302166									0.39896	-0.568826	0.466754	0.15578	-0.0525614	0.839398
0.42407	-0.19839	0.528104	0.688691	0.0278775	-0.229085									0.344128	0.104736	0.406777	-0.0665822	0.326296	0.185316
-0.492913	0.614282	0.0443064	0.0239919	0.475933	0.20553									-0.276503	0.294905	0.0242308	0.449959	0.250798	-0.02723
-0.416612	0.269136	-0.121648	0.333812	0.211735	-0.086502									-0.53481	0.729086	-0.115528	0.347865	0.274013	0.345986
-0.474299	-0.0730931	-0.0350853	-0.179929	0.584316	-0.28525									-0.347913	0.298596	0.186442	-0.317296	0.0519395	-0.00911142
-0.144945	-0.300856	-0.14299	-0.181607	0.495152	-0.348086									-0.298122	0.396751	0.120887	-0.00910856	0.439183	0.367876
-0.158837	-0.0882132	-0.0504003	0.480579	0.224625	-0.238487									-0.296658	-0.618439	-0.271111	0.475378	0.027425	0.225184
0.309905	0.181756	0.055177	0.136326	-0.0975387	-0.293265									0.455518	-0.208153	-0.286947	0.223088	0.691944	0.301178
-0.177475	-0.0973294	0.225081	0.320327	-0.000617501	-0.259489									-0.185875	-0.419193	0.401847	-0.153633	0.217316	0.626449
-0.484116	0.566083	-0.210119	0.102627	0.279991	-0.182052									-0.300847	-0.429043	-0.0484018	0.131508	0.0550799	0.440601
0.155966	0.217949	-0.0656472	-0.758741	0.257968	-0.296633									-0.220885	0.556247	0.131853	0.53727	0.344256	0.5013
-0.341264	-0.374381	-0.261022	0.259601	0.251579	-0.279697									-0.0897813	-0.296858	0.469438	-0.0645298	0.8258	0.329527
-0.543127	0.563059	-0.244572	0.306634	0.284948	-0.152606									0.290786	0.494513	0.0414237	-0.242708	0.399497	0.406201
-0.460661	0.181254	-0.0856365	0.361002	0.309216	-0.425914									0.468503	-0.487476	0.579623	-0.335592	0.0427636	0.27668
-0.419888	0.480613	-0.0936686	-0.134998	0.0147178	-0.0570091									0.0706115	-0.430515	0.385845	0.470134	0.098188	0.0564285
-0.087227	0.574447	-0.00795596	0.160406	0.59697	-0.311734									-0.307644	0.258155	0.189831	-0.0346509	0.254629	0.231429
-0.6267	-0.0247363	-0.188294	-0.435921	0.0628612	-0.272339									-0.347756	0.0045736	0.00281096	0.14486	0.566964	0.451361
-0.482204	0.145773	0.275202	0.36945	0.495952	-0.0770981									-0.203876	-0.220063	-0.296198	-0.048398	0.449344	0.306733
-0.431948	0.447073	0.157223	0.306718	0.261171	0.199509									-0.110334	-0.0414368	0.319515	-0.276849	0.00988167	0.456065
-0.455828	0.283932	-0.368948	0.244083	0.291003	-0.240281									-0.226468	0.00277719	0.319787	0.376487	0.549685	0.177897
-0.0645062	0.639773	-0.214667	-0.00122753	0.361884	-0.228794									0.358265	-0.36391	-0.319686	0.175301	0.22782	0.315658
-0.319467	0.47582	0.258412	0.0100436	0.0557336	-0.334157									0.0887189	-0.176423	-0.496041	-0.187589	0.177709	0.607181
-0.430872	0.314901	-0.413236	0.100891	0.277919	-0.635479									-0.212398	-0.316361	-0.526515	-0.203927	0.312928	0.240495
-0.429635	0.445658	-0.395386	0.368936	0.27546	-0.293708									0.510207	0.478644	-0.121389	-0.138473	0.21472	0.518042
-0.0766281	0.446665	-0.376939	0.327308	0.00783829	0.0136905									0.47437	0.00662597	-0.439942	-0.168461	0.0488989	0.604963
-0.503484	0.193541	-0.341758	0.277312	0.159473	-0.179097									-0.229787	-0.0584012	-0.26569	0.0281652	0.2459	0.281506
-0.613798	0.254887	-0.302991	-0.0503259	0.391477	-0.451514									-0.085722	-0.0417395	-0.238975	0.10411	0.203414	0.533357
-0.460335	-0.33257	-0.191808	0.322419	0.109177	-0.463272									-0.0674248	0.393867	0.629841	0.134351	0.254101	0.0558599
-0.279696	-0.31532	-0.212736	0.397086	0.132445	-0.084406									-0.420173	-0.093218	-0.118974	0.0771441	0.515806	0.194139
-0.666959	0.12109	0.531634	0.28149	0.0735206	-0.29412									0.241752	-0.562363	0.761542	-0.0320465	-0.0102261	0.5044
-0.508398	-0.0912388	-0.39632	0.0633243	0.481556	-0.332617									-0.193549	0.347502	0.0549455	0.085674	0.016392	0.0584289
-0.24273	0.46467	0.178284	0.417456	0.248987	-0.163327									0.255341	-0.0257059	0.504636	0.52254	0.443829	0.471877
-0.47939	-0.0699779	0.145372	0.364582	-0.0644686	-0.412883									-0.171816	0.311732	0.438612	0.594784	0.0643779	0.172951
-0.340095	0.0588355	-0.331159	0.331834	0.115574	-0.206772									-0.070249	-0.439144	-0.519389	0.282614	0.510485	0.29668
-0.494272	0.14097	-0.186502	0.219615	0.266668	-0.0592807									-0.483721	-0.380856	-0.419998	0.154937	0.212597	0.335414
-0.00161965	0.174321	-0.100177	0.127531	-0.335393	-0.553205									-0.298043	-0.257469	0.168015	0.379953	-0.0253462	0.0724067
-0.293722	0.138192	-0.380193	-0.438189	0.26277	0.0822309									-0.322755	-0.144647	0.526083	-0.168446	0.171553	0.276973
-0.291149	-0.118956	0.0555639	0.568716	0.472207	-0.203431									-0.285896	-0.386122	0.609065	0.263523	-0.505091	0.237263
-0.39693	0.28973	-0.181576	0.485934	0.0173556	-0.363391									-0.479499	0.136188	0.0175882	0.0243254	0.363895	0.240231
-0.234028	-0.029636	-0.0216173	0.122403	0.163607	-0.184401									-0.156927	0.0142777	-0.255774	-0.234119	-0.0213142	0.537925
-0.136576	-0.0725796	0.676934	-0.0223619	0.290365	0.275994									-0.324764	-0.202547	0.455052	-0.0829092	0.143675	0.284287
-0.171897	0.0515851	-0.0711933	0.423672	0.349186	-0.0116758									0.229976	0.309531	-0.0419361	-0.153955	0.170821	0.728037
-0.023064	0.159568	-0.262496	0.336727	0.205183	-0.0090593									0.203014	-0.0373211	0.063435	0.197126	0.295815	-0.0525313
-0.39763	-0.149313	0.0905482	-0.0613497	0.025377	-0.265352									-0.106471	-0.235661	0.421546	-0.0247123	0.495728	-0.199163
-0.521236	0.536409	-0.121111	0.0186373	0.208834	-0.515026									0.402645	-0.244451	-0.066834	0.052175	0.236222	0.599026
-0.366284	-0.157611	-0.464152	0.0160893	0.338	-0.438948									-0.399145	0.622246	-0.39046	0.00984698	0.471409	0.201069
-0.593054	-0.00886552	-0.289093	0.0125761	0.589722	-0.564966									0.178449	-0.0690314	0.403914	-0.0497899	0.230135	0.277339
-0.274394	0.166862	-0.0793063	0.228295	-0.0109967	-0.260553									-0.112181	-0.341016	0.143543	0.738708	0.464281	0.020467
-0.250378	-0.213624	0.243692	0.405596	0.320114	-0.256743									-0.150281	0.20564	0.532174	-0.0061305	0.471422	0.60244
0.0137222	0.248688	-0.552774	0.607835	0.213393	-0.0340332									-0.0648655	0.586727	0.032966	0.117525	0.135666	0.0648762
-0.457279	0.0361692	0.291964	-0.0394438	-0.00434791	0.368982									-0.477829	0.51744	-0.280251	-0.171361	0.532588	0.152256
0.0566401	0.599297	-0.535052	-0.00854913	0.0415603	-0.0689916									-0.599602	0.0880496	0.536324	0.672646	0.430211	0.00368527
-0.136944	0.029222	-0.210155	-0.280352	0.409154	-0.0119605									-0.0640172	0.708827	-0.316881	-0.172283	0.386133	0.270023
-0.658545	0.0460458	-0.311959	-0.00526913	0.680814	-0.00422335									-0.272289	0.00378495	0.223623	0.191089	0.20976	0.607848
-0.053755	-0.162861	0.10782	0.228768	0.0728804	-0.029564									-0.241431	-0.0513336	0.282863	0.331748	0.0104349	0.270591
0.106069	0.507024	-0.394403	0.422031	0.531697	-0.0982902									0.118524	0.00497141	0.480764	-0.120096	0.312757	0.616378
-0.354739	0.157049	-0.819711	-0.411663	0.246551	0.0191499									-0.460365	0.0627135	0.422674	0.207085	-0.27344	0.572693
-0.221384	0.0753217	0.193944	0.424117	0.042763	0.111826									-0.180665	-0.0203893	0.492192	-0.172878	0.510625	0.0932225
-0.688729	0.578794	-0.4662	0.167164	0.649054	-0.14434									-0.293624	0.475044	-0.225802	-0.407658	0.348354	0.32933
-0.0372702	0.0114539	-0.0120203	-0.354464	0.00225484	0.225755									0.276417	-0.254396	0.0150256	0.0202048	-0.0204501	0.34522
-0.0604033	0.276584	-0.320941	0.00588524	0.0812399	-0.279162									-0.305915	0.317596	0.282257	0.00517844	0.098303	0.504695
-0.370335	0.116248	-0.311825	0.181322	0.3656	-0.0757783									-0.324013	-0.297264	0.622276	-0.609577	0.0320559	0.358178
0.245946	0.233937	-0.239369	0.487126	0.240783	-0.107									-0.345361	-0.222236	0.472301	-0.390218	-0.0249226	0.511446
0.141777	0.596473	0.0521755	0.651787	0.404542	-0.420203									-0.121774	-0.148858	-0.373585	-0.218723	0.179837	0.711441
0.0801984	0.0916927	-0.0407885	0.177776	0.392808	-0.111401									-0.476426	0.563592	0.200743	-0.227836	0.0883246	-0.119855
-0.413903	0.479221	0.115984	0.123068	0.346982	-0.0348566									-0.306404	-0.249929	0.442405	-0.141407	0.0308188	0.24137
-0.260781	-0.0976605	-0.464976	0.300785	0.166496	0.0444378									0.0934951	-0.136095	0.192135	0.225945	0.0451689	-0.00308588
-0.667044	-0.0612321	0.125266	0.354229	0.642404	-0.0568402									-0.25329	0.3618	0.329074	-0.161356	0.224625	0.625851
-0.119874	0.398385	-0.717315	0.372859	0.135645	-0.352335									-0.32023	0.27022	0.0246418	-0.411662	0.0637417	0.297961
-0.241975	0.315788	-0.261489	0.610043	0.0686521	-0.171716									0.715426	0.135168	0.428534	-0.427472	0.101739	0.228682
0.00261967	0.341601	-0.135505	0.468856	0.128833	-0.21777									-0.245131	0.532829	0.0731316	-0.290287	0.39926	0.394151
-0.319254	0.43604	-0.669687	0.0531896	0.673421	-0.244022									0.265971	-0.149812	0.683655	-0.36842	0.351013	0.628728
-0.179904	-0.20606	-0.185902	0.582534	0.117589	0.0131996									-0.249102	0.223395	0.727524	0.42014	0.24715	0.284981
0.0329029	0.560855	0.348896	0.572895	0.0328481	-0.384404									0.149641	0.0789319	0.0414326	0.297143	0.466123	0.282412
-0.451133	0.298855	-0.38422	0.607763	0.413375	-0.220227									-0.0889326	0.227668	0.41585	-0.515845	0.412318	0.635465
-0.671167	-0.0998648	0.0707937	0.433463	0.396708	-0.352118									-0.246497	-0.213758	-0.0609783	0.586723	0.367945	0.158655
-0.06073	0.303775	0.136141	-0.310573	-0.230739	-0.00972969									0.408345	0.473612	0.620298	-0.0118904	0.357081	0.500219
-0.627605	0.393145	-0.0601122	0.667814	0.505563	-0.118817									-0.142129	-0.28119	-0.435001	0.560865	0.18084	0.441818
-0.0002179	0.353	-0.252045	0.649269	0.18243	-0.569434									-0.324596	-0.252219	0.43197	0.53388	0.149414	0.163815
0.219329	0.117886	-0.297387	-0.145921	0.0265168	-0.388689									-0.257745	-0.241127	0.279996	-0.0975776	0.450725	-0.338549
-0.0920099	0.602722	-0.401397	0.255365	0.321116	-0.266477									-0.351436	-0.305692	-0.136176	-0.136878	0.420543	0.369486
-0.212567	0.379991	-0.267416	0.644743	0.455309	-0.228355									-0.0716345	0.812653	0.423253	-0.141699	0.711058	0.409631
-0.268978	0.274836	-0.28476	0.107105	0.300711	-0.177192									-0.034153	-0.0571274	0.559495	-0.0167773	-0.00422776	0.629995
-0.12101	0.35039	-0.22777	0.0246888	0.24034	-0.0501462									0.146615	-0.13291	-0.114696	-0.118043	0.527078	0.561487
-0.0063592	0.547886	0.229231	-0.429285	0.380678	-0.31223									-0.303165	0.199204	-0.0970219	0.00823165	0.497129	0.64161
-0.183612	0.435993	-0.263308	0.290131	-0.0189813	-0.135367									-0.388325	-0.242897	0.492517	-0.153977	0.390283	0.234032
-0.0530836	0.0539793	0.134227	0.235711	0.326234	-0.216433									-0.085129	0.0442578	0.430338	-0.0593571	0.205491	0.587721
-0.287602	-0.0707998	0.739762	0.717018	0.481202	-0.0715567									-0.0502477	0.0153359	0.300871	0.103329	0.0781142	0.298893
0.118153	-0.487259	-0.278125	-0.46111	0.398607	-0.399385									0.190615	0.138988	-0.143093	-0.378041	0.307689	0.401655
-0.184734	0.512801	-0.0392757	-0.106591	-0.100295	-0.324577									0.269097	0.120874	0.607162	0.167353	0.162382	0.451281
-0.2185	-0.17907	-0.369807	0.40753	0.569074	-0.150247									0.330923	0.402387	0.346336	-0.137305	0.487959	0.140451
-0.511381	0.542299	0.157855	0.421109	0.309885	-0.0371747									-0.363584	0.116051	-0.228656	-0.0557564	0.221138	0.135237
-0.0112228	-0.035595	0.0679063	0.254173	0.443088	-0.300187									-0.46109	0.264357	0.0463398	-0.0383998	0.632654	0.384045
-0.561151	-0.508939	-0.515503	0.610489	-0.0191347	-0.199317									0.551464	0.315982	0.456051	0.0647873	0.502675	0.345709
-0.467293	0.281288	-0.498716	-0.240026	0.103195	-0.0849038									-0.432526	-0.0807721	0.52021	-0.0960908	0.58633	0.269035
-0.000988042	0.0500342	-0.034467	0.392715	0.126969	-0.306043									-0.316366	-0.246607	0.142182	-0.0458481	0.569861	0.0553621
0.0597326	0.123187	-0.208959	-0.157525	0.431583	-0.153053									-0.110451	-0.215744	0.329517	-0.211975	0.308123	0.0235339
-0.0495646	0.292175	0.428608	0.394931	0.387427	-0.301684									-0.152073	0.389294	0.246477	0.341101	0.526867	0.422606
-0.535111	-0.285394	-0.217554	-0.210824	0.105555	-0.0136363									-0.0799382	0.157748	-0.365636	0.106355	0.157697	0.698019
0.379005	0.0169626	-0.293489	0.338377	0.144801	-0.314567									0.346878	0.368564	0.384423	-0.417313	0.488802	0.323952
0.52756	0.189138	-0.522088	0.691927	0.102274	-0.234869									0.58406	0.489579	0.483839	0.324254	0.257283	0.349262
-0.364345	-0.0125531	-0.194959	0.363969	-0.0552675	-0.331169									-0.383139	0.18671	-0.291512	-0.121133	0.0504935	0.637955
-0.52228	0.367223	-0.649635	0.64015	0.428443	-0.199245									-0.0015344	0.263751	-0.448238	-0.270524	0.600239	0.347203
-0.177764	-0.0444945	-0.619623	0.58928	0.16865	-0.0781084									-0.393415	0.317494	0.458852	-0.316682	0.395837	0.141096
-0.570237	0.546727	-0.00458721	0.335428	-0.118828	-0.255248									-0.105242	-0.218696	0.360763	0.512809	0.544133	0.629155
-0.140339	0.53776	0.353078	0.352281	0.023165	-0.0609148									-0.381861	0.128238	0.455696	0.51587	0.536197	0.107998
-0.262678	0.222598	0.338617	-0.468923	0.627243	-0.281862									-0.329475	0.112131	-0.167142	-0.40882	0.538546	0.426708
-0.371978	-0.00282525	-0.442191	0.5232	0.0458501	-0.0100321									-0.0681147	-0.148621	0.148046	0.460698	0.602958	0.441676
-0.0844464	0.199922	0.612236	0.61766	0.255831	-0.0359231									0.0289137	-0.3666	-0.0118267	-0.126993	0.492318	0.681795
-0.449735	0.592862	-0.0748765	0.540856	0.444547	-0.439344									-0.18636	0.0628048	0.537749	0.0622945	0.325031	0.349019
-0.316534	0.367965	-0.381932	0.548183	0.099576	0.255857									-0.29712	-0.100041	0.450011	0.485338	0.0588285	0.257934
-0.152779	0.264877	-0.51463	0.628569	0.381619	-0.046283									-0.213012	0.346083	0.339519	0.423296	0.293165	0.464055
	-0.00842592	0.139285	0.360328	0.352432	-0.279193									-0.158123	0.263794	0.795983	0.584387	0.0422636	0.0952849
	-0.222014	-0.867666	0.176362	-0.0737155	-0.278121									-0.172305	0.13095	0.150565	-0.0467756	0.376472	0.424865
	0.41634	-0.662962	0.446635	0.410772	-0.203282									-0.110772	0.28694	0.645524	0.454289	0.0353155	0.362208
	0.25342	-0.0227243	0.382022	0.779264	-0.25743									0.231416	-0.0922111	0.340499	-0.239243	0.243534	0.284996
	-0.0295485	0.0206753	0.0838824	-0.0321792	-0.184587									-0.0270066	0.308591	-0.103651	-0.20238	0.478585	0.409616
	0.0498008	-0.826373	0.692731	-0.0775828	-0.306197									-0.0418137	-0.464397	0.127042	-0.239973	0.356751	0.592026
	0.0613767	0.60939	-0.0453515	0.141199	-0.251167									-0.214067	0.38993	0.215639	-0.0843816	0.502624	0.594457
	-0.159038	0.390377	-0.127852	-0.0130429	-0.156732									0.390882	-0.48645	-0.0574571	0.154219	0.171469	-0.0637139
	0.377624	-0.845547	0.0891034	-0.0167348	0.113641									-0.177905	0.463854	0.561214	0.175302	0.187801	0.368056
	0.0807754	-0.501835	0.0449288	0.390109	0.0313485									-0.134311	0.306242	0.360572	0.287822	0.00865419	0.466386
	0.216512	-0.0735759	0.361333	0.040953	-0.0734851									-0.135402	-0.208179	-0.0374922	0.277911	0.142552	0.397537
	0.303945	-0.649667	-0.164978	0.371588	-0.248709									-0.166317	-0.125191	0.247132	-0.12337	-0.0112353	-0.133972
	0.321907	0.504337	-0.138952	-0.0582157	-0.164031									-0.136302	-0.135778	-0.0432134	0.263385	0.304252	0.501509
	0.386837	0.279745	0.366071	0.363108	-0.0571051									-0.404689	0.0106283	0.68908	-0.0701853	-0.0333708	0.237299
	0.0913806	-0.491925	-0.146911	0.127462	-0.268032									0.00542329	0.0393704	0.679981	-0.60861	0.0152967	0.150878
	0.343769	-0.504147	-0.0624981	0.348032	-0.311156									-0.268946	-0.0198578	-0.290457	-0.18074	0.733235	0.223025
	0.154884	0.284139	0.19488	0.378466	-0.454036									-0.273448	-0.222882	-0.223894	-0.31737	0.504355	0.339379
	0.157246	-0.310808	0.381738	-0.0480652	-0.270352									-0.312419	-0.29853	-0.31214	-0.40143	0.155139	0.514805
	0.18851	-0.437265	-0.0289755	-0.0777724	0.0866073									-0.152704	-0.158828	0.0195371	0.687218	0.116521	0.380882
	0.438924	0.0579038	0.257896	0.233608	-0.122681									-0.268755	0.00843842	-0.247176	0.176365	0.595372	0.0857431
	-0.107599	-0.0177574	0.0645732	0.0648032	-0.300171									-0.302631	0.2093	-0.327755	0.622376	0.278341	0.303583
	-0.163019	0.164697	0.377176	0.63618	-0.13761									-0.0801408	-0.446204	-0.154804	0.374951	0.629035	0.340675
	0.627004	0.0993215	0.422823	0.534265	-0.223788									-0.294179	0.197892	-0.172206	-0.149913	0.262449	0.572279
	0.486362	-0.533558	0.263611	0.53557	-0.38766									-0.23765	0.258885	-0.12522	-0.110457	0.550814	0.207614
	0.516623	-0.31271	0.334009	0.442118	0.448335									-0.159909	0.155857	0.345585	0.437803	0.228274	-0.0404672
	0.664079	-0.178937	0.358861	-0.00521421	0.0977274									-0.366706	-0.292223	-0.0779583	0.227071	0.257127	0.371547
	0.536931	-0.397271	0.347807	0.610906	-0.284981									0.511286	-0.214585	0.0673608	-0.408311	0.408185	0.357848
	0.38939	0.260506	0.458284	0.292928	-0.403297									-0.324432	-0.104949	0.153653	-0.398913	-0.0275752	0.0837868
	0.58286	0.0909318	0.355195	0.441209	-0.060812									0.0336201	-0.393865	-0.183362	-0.196165	0.483171	-0.00976742
	0.335472	0.316907	-0.235947	0.375894	-0.128624									-0.221926	0.158065	-0.107303	-0.427019	0.31471	0.449208
	0.688963	-0.0547918	0.0445927	0.498955	-0.125125									-0.260172	0.0619349	0.246009	0.0599572	0.37553	0.451667
	0.211136	-0.424358	-0.659669	-0.201006	-0.38026									-0.224916	-0.246503	-0.0162609	0.166307	0.0472639	0.407406
	0.470725	-0.109652	-0.0834766	-0.0608739	-0.0654459									-0.219	-0.0748979	0.365341	-0.100839	-0.0951803	0.0392313
	0.628191	0.297066	-0.659182	-0.0471722	-0.249083									-0.073637	-0.415696	0.237082	0.518128	-0.149447	0.515905
	0.215167	0.535486	-0.126667	0.405501	-0.315971									-0.291673	0.394782	0.231932	-0.287302	0.000814747	0.035818
	0.726473	-0.393423	0.074768	0.0284944	-0.233302									-0.143002	0.162596	-0.210864	0.17393	0.0228874	0.64428
	0.374623	-0.642662	-0.392673	-0.0969937	-0.356153									-0.334287	-0.301495	0.334967	-0.219762	0.254953	0.415754
	0.21823	-0.160974	0.0117434	0.228257	-0.425515									-0.293924	-0.245295	0.39277	-0.251367	0.319447	0.488241
	0.200534	0.44366	0.35378	0.268345	-0.0036509									-0.517308	-0.155501	0.365281	-0.28249	0.0917285	0.566858
	0.373667	-0.0701245	0.116849	-0.287223	-0.0691809									-0.25149	-0.163762	-0.0353891	0.244188	0.353262	0.493969
	0.425055	-0.340936	0.601775	0.0884131	-0.30963									-0.678404	-0.278877	0.275003	-0.0172604	0.327216	0.0862583
	0.0793208	-0.363629	0.265517	0.318482	-0.102027									-0.177613	-0.151896	-0.20018	-0.0129051	0.777742	0.292642
	0.280543	-0.0506678	0.596718	-0.174723	-0.445756									-0.266963	0.120355	0.457646	0.00373384	0.311979	-0.00445346
	-0.278729	0.156869	0.178231	0.57205	-0.371338									0.158802	-0.0944934	0.411062	-0.0968851	0.433087	0.288251
	0.305298	0.471252	0.499302	-0.0012859	-0.0929545									-0.26626	-0.028273	-0.0473079	-0.0268538	0.52151	0.510398
	0.504056	-0.524713	0.0902872	0.153425	-0.2782									-0.140061	-0.00836503	-0.271832	0.507478	0.10766	0.283452
	0.378077	0.0186633	-0.0634677	0.0135622	-0.226715									0.52078	-0.387869	-0.088398	-0.080527	0.334561	0.270948
	-0.0856784	-0.612851	0.588091	0.0411586	-0.169012									-0.0609526	-0.285798	-0.243418	0.312061	0.524212	0.297294
	-0.184886	0.535397	-0.0152758	0.466735	-0.103365									0.404212	0.201832	0.555302	0.506801	0.181533	0.582814
	-0.421569	-0.121916	-0.121744	0.282339	-0.117131									0.326134	-0.229485	0.173522	-0.40209	0.070781	0.113106
	0.471589	0.551089	-0.0287788	-0.0657886	-0.108604									0.537727	-0.255695	-0.119536	-0.18527	0.623739	0.601244
	0.639409	-0.402105	-0.0660139	0.0604494	-0.199034									-0.334217	0.295165	0.0698424	-0.299984	0.0461267	0.120665
	0.383716	-0.396124	0.382853	0.0482489	-0.20102									-0.445026	0.421672	-0.133473	0.20617	0.363199	0.49546
	0.0407115	-0.237772	0.524847	0.092236	0.24255									0.27337	-0.0798036	0.168749	0.371334	0.357881	0.196153
	-0.0381821	-0.627458	0.249496	-0.134626	-0.0784868									-0.307984	-0.172885	-0.0100559	-0.401221	0.255203	0.37158
	0.484567	-0.451694	0.329502	-0.186456	-0.630051									-0.375524	0.41549	0.252989	0.143503	0.00799966	0.35756
	-0.0462053	0.229355	-0.00691226	0.0553835	0.0478826									0.0468572	-0.0304992	0.0544233	-0.101197	0.00351379	0.526214
	-0.218301	-0.0990058	-0.148453	0.0384293	-0.314827									-0.106064	0.447914	-0.0591634	-0.119897	0.336594	0.21986
	0.576341	-0.385738	0.0295251	0.00314035	-0.309331									-0.36586	-0.406227	-0.0774172	0.145133	0.205155	0.512134
	0.392339	0.117883	0.374696	-0.0882614	-0.0772118									-0.400483	-0.246726	-0.0232975	-0.0898809	0.23915	0.268219
	0.312972	-0.33596	0.0714074	-0.176478	-0.389849									-0.56323	-0.13431	0.358461	-0.102196	0.000870315	0.165473
	0.128643	0.23745	0.136872	-0.0567272	-0.292404									-0.0504104	-0.0706418	0.15614	0.449078	0.606328	0.181813
	0.340869	-0.417869	0.0368356	-0.0640039	-0.175026									-0.179001	-0.0291725	-0.0746893	0.557447	0.513943	0.645068
	0.0416225	-0.280512	-0.163871	-0.101361	-0.0462361									-0.369126	0.442028	-0.0798114	0.48124	-0.0838844	0.378157
	-0.705185	-0.306551	0.251617	0.0999145	-0.114472									-0.0746367	0.165455	-0.0373106	-0.0294597	-0.025715	0.341082
	0.511625	-0.368895	0.489648	0.454168	-0.540856									-0.27048	-0.385102	0.132202	0.118492	0.321947	0.336069
	0.0517596	-0.087379	0.415792	0.43832	-0.0814606									-0.25887	0.072833	0.297191	-0.101425	0.234683	0.181243
	0.0935719	-0.15586	0.282618	0.139358	-0.280411									-0.292554	0.428027	0.238793	-0.485354	-0.109586	0.309446
	0.274299	-0.180128	0.149122	0.760757	-0.167045									-0.515935	0.0891897	0.480934	-0.209616	0.224597	0.573491
	-0.275442	-0.127753	0.0885957	0.176738	-0.301258									-0.353084	0.0565632	0.44766	-0.0366373	0.23489	0.254913
	0.361381	-0.306454	0.0641353	-0.162488	-0.576779									-0.337051	-0.292458	0.0109009	-0.231381	-0.0577492	0.426073
	-0.0357039	0.497747	0.613271	-0.145693	-0.376471									-0.288272	-0.275803	0.26011	-0.101775	0.0207272	0.578559
	0.347112	-0.123805	-0.148987	0.000311539	-0.315561									-0.529885	-0.165801	-0.196131	0.87337	0.41578	0.372458
	-0.193281	-0.0334978	-0.0440592	0.537312	-0.274709									-0.342078	0.371447	0.142948	-0.0249686	0.366439	0.158395
	0.390677	0.804609	0.12503	0.0395263	-0.282623									0.0797013	-0.350394	-0.116355	0.0860656	0.262758	0.661693
	-0.00163656	-0.467493	0.72693	-0.163892	-0.211059									-0.275617	-0.268955	0.146616	0.0279028	0.0274787	0.417977
	0.389765	-0.673933	0.0248024	0.148455	-0.463756									-0.222681	0.0411432	-0.195638	0.920936	-0.00297228	0.0186121
	0.108069	-0.0561833	0.306265	0.323423	-0.126181									-0.0177653	0.297839	0.190957	-0.129462	0.065302	0.0591561
	0.29418	-0.289519	0.294425	0.0230827	-0.323651									-0.0761918	0.111132	0.403908	-0.205924	0.152801	0.101262
	-0.303377	-0.489774	0.0970347	0.10008	-0.252968									0.399842	-0.317169	-0.129764	-0.385725	0.0330562	0.342071
	-0.142782	0.610854	-0.143821	0.0216189	-0.191455									-0.343367	-0.0613964	0.0671252	-0.145381	0.512946	0.0979224
	0.249586	0.491629	0.248489	-0.0353243	-0.426241									-0.621366	0.478505	0.172445	-0.0841524	0.460022	0.569745
	0.0103465	0.030347	-0.240147	0.0918303	-0.501157									-0.127254	-0.170431	-0.06144	0.701112	-0.146584	0.16085
	-0.098645	-0.613264	0.551789	0.0171836	-0.0695377									-0.470964	-0.0355361	0.114979	-0.17245	0.414508	0.602022
	0.559096	-0.167008	0.685415	-0.109691	-0.423058									-0.267753	0.28324	0.3996	0.0383421	0.402377	0.327346
	-0.4231	0.00027961	0.351463	0.153061	-0.192305									-0.208605	-0.301218	-0.104606	0.0270782	0.525077	0.272786
	0.17073	-0.286394	0.125285	-0.0428118	-0.559007									-0.197921	-0.184442	0.0174895	-0.271767	-0.0242929	0.361686
	0.127145	-0.31235	-0.488051	0.318836	-0.37522									0.16302	-0.165739	0.660977	0.216317	0.544329	0.419318
	0.350549	-0.0630883	-0.009715	0.412469	-0.207507									-0.527277	0.261628	0.53324	-0.0154939	0.320457	0.336622
	0.437545	-0.10707	-0.715607	0.0600182	0.385174									-0.214014	-0.334581	0.60588	-0.26526	-0.0241352	0.0224141
	0.662294	0.231094	0.353096	0.416579	-0.290591									0.0411982	-0.152578	-0.141858	-0.0828859	0.352348	0.187395
	0.681529	-0.232281	0.0952845	0.0143415	-0.190993									-0.0970417	0.431501	0.323768	0.650973	0.445439	0.265345
	0.569894	-0.439678	-0.155081	-0.0468758	-0.449349									0.288192	0.530857	0.55817	-0.411639	0.101744	0.582324
	0.475331	0.81826	0.202105	0.361101	-0.363731									-0.0281853	0.0374088	0.269729	-0.289813	0.245828	0.302834
	0.546633	0.224462	0.170492	0.433466	-0.0263483									0.0926742	0.0370094	-0.630764	0.693241	-0.03537	0.525438
	0.444028	-0.175857	0.104064	0.605528	-0.287745									-0.455787	0.36309	-0.000783392	0.147066	0.23175	0.0565136
	0.247149	-0.122423	0.329818	0.162712	-0.200584									0.0540836	0.110705	-0.208603	0.254472	0.456854	0.365732
	0.550773	-0.118722	0.0885776	0.306863	-0.320729									-0.420696	-0.248346	-0.294766	-0.133837	0.224863	-0.147402
	-0.0228935	0.0523953	0.43179	0.318656	-0.0040112									-0.141265	-0.0577548	0.502915	0.340233	0.209789	0.125523
	0.280533	0.49252	0.0318429	0.00160953	-0.294068									-0.0718303	0.163846	0.479622	0.489059	0.104357	0.290478
	0.36577	-0.263895	0.168221	0.0513073	0.0136081									-0.227684	-0.21293	0.257223	0.178603	0.108491	0.0390274
	0.363691	-0.35208	-0.531518	0.449836	-0.481199									-0.179165	-0.0303801	-0.535001	-0.0317057	0.429616	0.644252
	0.237844	-0.673033	0.311953	0.0130098	-0.119422									-0.237546	0.633249	0.57281	-0.161962	0.0802088	0.503422
	-0.34398	-0.765333	-0.0282832	0.441628	-0.00250111									-0.44154	-0.204086	0.309703	0.246409	0.131891	0.319159
	-0.0272692	0.378369	0.106855	0.597722	-0.10591									-0.474215	-0.351498	0.148975	0.0376966	0.470424	0.147295
	0.236343	0.227576	0.162425	0.234035	0.0109587									-0.285205	0.278354	-0.67019	0.0612326	0.587306	0.397238
	-0.0877572	-0.265589	-0.23863	0.160824	-0.116988									-0.325822	-0.0343922	0.286326	-0.240194	0.440456	0.346278
	-0.0721806	0.0573807	0.0121052	0.426004	-0.262163									-0.0703463	0.388781	0.0207767	0.0904823	0.417216	0.331614
	0.447576	-0.614801	0.240206	0.303715	-0.0840574									-0.463335	-0.212891	0.786608	-0.113205	0.249926	0.476134
	0.222312	0.00979437	-0.0748659	0.144981	-0.274017									-0.240833	0.220711	0.268261	-0.207377	0.18048	0.413329
	0.375502	0.0346002	-0.0688069	0.402579	-0.0632649									-0.0796273	0.177501	0.449048	0.0573841	0.355145	0.264072
	0.425391	-0.60472	0.348635	0.026894	0.0165086									-0.160481	0.0595266	0.416662	-0.257881	0.354946	0.42488
	0.208676	-0.0203031	0.223468	-0.0348196	-0.233362									-0.412019	0.468983	-0.571908	0.315051	0.374957	0.418891
	0.0113612	-0.319935	0.213561	0.0362078	-0.0408651									-0.323395	0.0564082	0.612493	0.0381923	0.374624	0.247588
	0.511561	0.42956	-0.383348	0.53845	0.271576									-0.253839	0.00594541	-0.488789	0.23915	0.387474	0.407506
	0.626108	0.0590631	0.414808	0.34514	-0.447531									-0.272533	0.101027	0.309621	0.0400877	0.211829	0.316783
	0.152152	0.204801	0.276521	0.111879	-0.062007									-0.23606	-0.303995	0.412431	-0.25898	0.485176	0.0457105
	-0.170884	-0.210226	0.0781529	0.0373623	-0.0890006									-0.431323	-0.364326	-0.110967	0.370863	0.0368576	0.367174
	0.206464	0.0995478	0.522359	-0.0427903	-0.33808									-0.137384	0.0353011	0.137739	0.206563	0.335792	0.405622
	0.028662	0.00939075	-0.04501	-0.0759397	0.00129476									0.351148	0.522405	0.0515499	-0.00252057	0.288328	0.461397
	-0.0798022	-0.640036	-0.49219	0.15121	-0.130726									-0.410239	0.0815524	0.245589	-0.0174503	0.41157	0.265969
	-0.0365904	-0.0549202	0.190571	0.0506048	-0.149344									-0.0713068	0.0344056	-0.220916	0.34895	0.467226	0.192737
	0.150005	0.0261205	0.427757	-0.0275542	-0.262875									-0.0526041	0.176558	-0.0818039	-0.00899412	0.0230015	0.0534618
	0.324505	-0.109451	0.0528238	-0.106106	-0.215798									-0.0438089	-0.205766	-0.220392	-0.151571	0.069999	0.104989
	0.0811197	-0.591328	0.0971369	-0.0165569	-0.173014									0.372533	-0.00468773	-0.592244	-0.518875	0.65218	0.395098
	0.345867	0.485374	0.0269748	0.0513382	-0.431313									-0.241617	-0.233795	-0.244649	0.177042	0.515581	-0.0322414
	0.116846	-0.105686	-0.0351449	0.136602	-0.328542									-0.081032	0.224581	0.371834	-0.157103	0.569922	0.239039
	0.102265	-0.446852	0.276553	0.174189	-0.0633113									-0.22815	-0.230956	0.288553	-0.242763	0.681393	-0.0367321
	0.0615914	-0.414826	0.098764	0.0309388	-0.0727513									0.0741736	0.477204	-0.278656	-0.449407	0.0039832	0.202443
	0.0918866	0.766388	-0.216027	-0.0376827	-0.373579									-0.304347	0.556585	-0.0545468	-0.0324755	0.528621	0.180779
	0.274907	0.614306	-0.622639	0.0282976	-0.281509									-0.370114	0.199461	0.120687	-0.549204	0.391521	0.238775
	0.0224302	0.557135	-0.270913	0.197468	-0.370688									-0.10883	-0.134301	0.549969	0.517496	0.384706	0.0720624
	0.392834	0.423565	0.279245	0.0131214	-0.327336									-0.338003	0.153498	0.00656507	-0.197282	0.360116	0.374092
	-0.0892727	-0.292364	0.235207	0.165578	-0.56273									-0.15424	0.39579	0.444517	0.24992	-0.023451	0.403396
	0.389115	-0.511995	-0.224936	0.093739	-0.375862									-0.122659	0.183363	-0.0519492	0.0252861	0.397561	0.648536
	0.0778645	-0.0200467	-0.601076	0.0703471	-0.451675									-0.211602	-0.200818	0.647628	-0.447592	0.474863	0.379066
	0.264304	-0.367749	0.816173	0.137023	-0.341361									-0.533537	0.122582	0.0717815	0.281271	0.52513	0.567409
	0.0802773	-0.376088	0.106104	0.0442954	-0.45151									-0.39254	0.333957	-0.270411	-0.179871	0.390539	0.448949
	-0.00583106	0.372535	0.170974	0.706957	-0.136968									0.101395	0.0677005	0.0787114	-0.211458	0.100967	0.238871
	0.0244649	0.0332597	-0.11513	0.505133	-0.0252621									0.453391	0.37307	-0.217003	0.179877	0.152426	0.347514
	0.507004	-0.563728	0.104723	0.0329834	-0.324086									-0.476566	-0.151566	0.0436294	0.713587	0.4199	0.170519
	0.485688	0.00810962	-0.028555	-0.105662	-0.309939									-0.321802	-0.138249	0.11295	0.563762	-0.00623945	-0.0144969
	0.548404	0.212995	0.61592	0.141699	-0.469759									-0.354471	0.21856	-0.400537	-0.0100236	0.280539	0.195396
	0.142593	-0.266641	0.459272	0.00326769	0.0330626									-0.124526	-0.196847	0.0410795	-0.258736	0.440751	0.478626
	-0.36979	0.0249184	-0.196701	-0.137375	-0.073898									0.0461097	0.0942188	0.509186	-0.0478949	0.421693	0.261322
	-0.0464358	0.11683	0.19629	0.0426173	0.068862									0.00170957	-0.152658	-0.0518764	0.462197	0.497094	0.285251
	0.304911	-0.628383	0.0797809	0.0730235	-0.331241									-0.257987	-0.249103	0.35546	-0.0852376	0.0213052	0.0241996
	-0.23938	-0.33312	-0.312147	0.674837	-0.5251									0.124808	-0.135335	0.420187	0.300439	0.112853	-0.0531594
	0.318554	-0.30172	0.495315	0.675906	-0.101948									0.203898	0.638187	-0.239651	0.0350014	0.449243	0.405208
	0.380626	0.313761	0.253271	0.563958	-0.49456									0.738713	-0.240104	-0.208895	0.186022	0.0127673	-0.0192799
	0.00687724	-0.0312496	-0.19474	0.326373	-0.631745									0.300105	-0.134189	0.185929	0.357677	0.0637958	0.315953
	0.266202	-0.391888	-0.195119	0.509594	-0.307635									-0.0931169	-0.312352	0.063917	0.524883	0.268502	0.331947
	0.103532	-0.183244	0.135798	0.134321	-0.0650013									-0.258592	-0.0978311	0.0387351	-0.0581182	0.169358	0.00178961
	0.633361	-0.456369	0.0584792	0.50178	-0.0753105									-0.304827	-0.207652	-0.503408	-0.429891	-0.11408	0.16818
	0.273204	0.0739938	-0.00922637	0.499479	-0.29992									-0.48777	-0.516171	0.321201	-0.0418722	0.318335	-0.11882
	0.509808	-0.256016	-0.227395	0.439183	-0.129293									-0.148117	-0.295786	-0.11667	-0.0179061	0.140253	0.0818807
	-0.170361	-0.183948	0.0156688	-0.135533	0.0262849									-0.262132	0.201294	0.548125	0.648735	0.0532732	-0.0264972
	0.434232	0.387839	-0.606839	0.110684	-0.270569									-0.534381	0.38339	0.630836	-0.45362	0.036448	0.181347
	0.322397	0.225981	-0.565025	0.030625	-0.0255562									-0.636832	-0.293087	0.451622	-0.0624773	0.311985	0.35842
	0.660837	-0.158095	0.231868	0.086753	-0.0236443									-0.382231	0.267795	-0.126589	-0.310713	0.147672	0.629476
	0.139253	0.1481	-0.00187146	0.486761	-0.28658									-0.586661	-0.291114	0.702886	0.702269	0.494609	0.575736
	0.262388	-0.0128004	0.0915275	0.0736788	-0.312328									-0.0547774	-0.118675	0.102382	0.440716	0.174064	0.675031
	0.0797861	-0.116518	-0.081099	0.461455	-0.101569									0.567632	-0.212763	0.341445	0.28935	0.193166	0.135208
	0.459871	-0.0846552	0.309583	0.396258	-0.0269866									-0.40765	0.0541781	0.396124	-0.113516	0.270597	0.159861
	0.122936	-0.0429201	-0.317204	0.23337	-0.319196									-0.484019	0.145945	0.0487439	0.585119	0.292202	-0.330979
	-0.05466	0.1681	0.46672	0.21305	-0.325392									-0.430314	-0.109348	0.929321	-0.0982648	0.297519	0.0474679
	0.0569097	-0.16772	0.347664	0.33815	-0.161658									-0.111796	0.209557	-0.245247	0.288804	0.367165	-0.133196
	0.608722	0.0210649	0.23153	0.0977234	-0.32733									-0.0107652	-0.151206	-0.208207	0.041695	0.011066	0.171816
	0.366521	-0.0302736	0.263117	0.113371	-0.0706511									-0.196555	0.496052	0.0723969	-0.311767	0.221759	0.395327
	0.480411	0.413396	0.298943	0.102725	-0.0856916									0.286593	-0.216575	0.472796	0.386899	0.345216	0.386099
	0.60507	-0.199236	-0.23374	0.0605367	-0.557207									-0.534556	0.437426	-0.122146	-0.30459	0.123624	0.350542
	0.331846	0.196029	0.585139	0.474549	0.328317									0.219357	0.123603	0.450312	0.260233	0.0219612	0.289602
	0.44943	-0.425697	0.408243	0.50652	-0.0165481									-0.139992	0.462846	-0.109103	-0.230481	0.439828	0.25913
	0.113343	-0.161643	-0.583311	-0.125913	-0.0942866									0.311141	0.541071	-0.384162	0.213666	0.118302	0.337064
	-0.106949	0.0102398	0.0708697	0.583005	0.0388345									-0.434855	-0.314822	-0.018106	0.523872	0.109652	0.611326
	0.452264	-0.311565	0.686166	0.0137411	-0.0579715									-0.486592	-0.212141	0.404779	-0.149059	0.112168	0.239319
	0.335049	0.246799	-0.205274	0.361252	0.086457									0.650589	-0.21231	0.449128	0.0454662	0.453285	-0.0846776
	0.405248	-0.391111	0.176727	0.240635	-0.359974									-0.394461	-0.12044	0.28484	-0.0777834	0.00798085	0.48478
	0.211387	0.0359094	-0.353687	-0.0591347	-0.548836									-0.282035	-0.0210322	0.575985	-0.104736	0.0112103	0.103334
	-0.00233108	-0.233129	0.210174	0.300179	-0.330167									-0.0949918	-0.0669896	0.323025	0.296584	0.22611	0.489891
	-0.265689	0.321851	-0.136238	0.320851	0.0603848									-0.17165	-0.395827	-0.114271	0.348142	0.323619	0.48547
	0.594066	-0.0512429	0.531307	0.358587	-0.0590361									-0.256019	-0.0687788	-0.227959	0.272004	0.368233	0.428044
	0.552369	0.586953	-0.436509	-0.013905	-0.480563									-0.279982	-0.329257	0.208684	-0.0505149	0.1564	0.224332
	0.025334	-0.437305	-0.156082	0.397411	0.0124908									0.053995	0.665601	-0.0307673	0.618281	0.253661	0.540888
	0.0119274	0.0785884	-0.304679	0.490068	-0.32769									-0.0671057	0.0377104	0.0938203	0.21928	0.112772	0.336816
	0.580712	-0.0737011	0.221943	0.601557	-0.328523									-0.228742	-0.0438013	-0.105136	0.379389	0.0316645	-0.101305
	0.364427	-0.00572038	0.147395	0.0662207	0.126182									0.0226021	0.371025	0.135163	-0.16935	0.201477	0.112967
	0.251998	-0.104283	-0.199567	0.0299413	-0.341216									-0.364768	0.473371	-0.00330318	-0.396432	0.244064	0.32215
	0.506231	-0.180995	0.015443	0.49454	-0.190285									-0.456061	0.534625	-0.124024	-0.206461	0.168214	-0.0718172
	-0.0372624	-0.308595	0.430485	0.531219	-0.0952926									0.242833	-0.293645	0.0779586	-0.705869	0.21695	0.526551
	0.176897	-0.152334	0.641074	0.484668	-0.371682									0.623004	0.225753	0.26974	-0.359606	0.31707	0.358191
	0.139871	0.711482	0.470112	0.300781	-0.395433									0.0774966	0.014813	-0.179326	0.0818206	0.282605	0.106759
	0.367909	-0.623551	-0.111247	-0.135212	0.149914									-0.321279	0.0986928	0.203887	0.640124	0.0253391	0.00895658
	0.253971	0.182362	-0.272313	0.0133476	-0.509422									-0.27743	0.388413	-0.127898	-0.0129576	0.13492	0.426285
	-0.11146	-0.106802	0.0410122	0.640096	-0.26838									-0.521936	-0.0518766	0.0480039	-0.0751351	0.305196	0.0843825
	-0.567528	-0.00845557	0.216583	0.313265	-0.564565									-0.606994	-0.451562	-0.329099	-0.185836	0.460635	0.599395
	-0.274886	-0.484867	0.709633	0.471428	-0.623988									-0.0937098	0.377201	-0.256594	0.448337	0.313265	0.363612
	0.0628051	0.0587055	0.692357	-0.0542963	-0.449185									0.000205702	0.549086	0.534973	0.0744926	0.483959	0.489529
	0.0234546	0.0103213	0.0605735	0.277419	-0.470509									0.226967	0.476352	0.593299	0.0603304	0.173182	0.0300545
	-0.220176	-0.396004	-0.195921	0.4346	-0.156993									-0.0798411	-0.231818	0.138365	-0.166796	0.434961	0.0289818
	0.411589	-0.119461	0.0659391	0.407145	-0.255321									-0.392696	-0.0816936	0.074239	0.156764	0.365367	0.311952
	-0.240878	-0.348879	0.0827633	0.0586623	-0.250902									-0.287958	-0.0898119	0.316922	0.389933	0.396518	-0.121246
	0.289108	-0.206454	0.0155522	0.447814	-0.584845									-0.465859	0.0470763	-0.395575	0.785406	0.172637	0.328131
	-0.301876	0.644104	0.306899	-9.08017e-05	-0.332383									0.103108	-0.0605508	0.460801	0.262125	0.310203	0.0356931
	-0.486209	-0.123225	0.416765	0.373785	-0.361548									-0.130921	-0.0390228	0.513096	-0.427349	0.301792	0.464782
	0.560368	0.0120203	0.0695166	0.587846	-0.0600274									-0.266702	-0.233137	0.029563	0.221991	0.440531	0.458106
	0.256998	0.082663	-0.122796	0.0629857	-0.285818									-0.169096	-0.411503	-0.267112	0.0932583	0.354662	0.222894
	0.139446	0.278517	0.022756	0.0509945	-0.206791									-0.0509018	0.0244541	-0.102881	0.41291	0.39476	0.0132603
	0.332453	0.206022	0.122586	0.0446608	-0.185883									-0.134143	0.64169	0.493625	0.0294403	0.106005	0.2203
	0.558961	-0.302467	0.297284	0.240918	-0.361478									-0.13432	0.396409	0.188974	0.27475	0.208099	0.187499
	0.0517263	0.131904	0.0233345	0.271125	-0.548575									-0.243191	-0.261332	0.023238	0.371761	0.558521	0.164562
	0.539661	0.0921642	0.551077	-0.00634887	-0.323166									-0.171642	-0.0138849	0.263111	0.306943	0.42875	0.174897
	0.0318518	-0.241002	-0.214738	0.737475	-0.233852									-0.492724	-0.193069	0.0888399	0.0483178	-0.0980993	0.165526
	0.125354	-0.160095	-0.550653	0.593814	-0.278849									0.331136	-0.690084	-0.0504484	0.263788	0.629686	0.201598
	-0.038513	-0.0178501	0.432199	0.099507	-0.346615									-0.249457	0.460877	-0.416377	-0.00151116	0.105681	0.313056
	0.392943	0.174256	0.0143541	0.267586	-0.299542									-0.309361	-0.267855	-0.241824	0.519093	0.727281	0.426565
	0.315887	-0.0830882	0.22229	0.439962	-0.405954									-0.213105	0.215005	-0.000129456	0.351064	0.391548	0.2408
	0.033092	-0.376188	0.208423	0.480816	-0.473598									-0.548116	0.462339	-0.284501	0.55542	0.167297	0.311316
	0.116112	-0.161325	-0.15162	0.0722189	-0.338751									-0.326464	0.425758	-0.275585	-0.327428	0.395895	0.167573
	-0.155872	-0.292393	0.641436	0.0543199	-0.602896									-0.383247	-0.171882	-0.607935		0.306371	-0.0292189
	0.107659	-0.0171205	0.27166	-0.303857	-0.414641									-0.683088	-0.537744	0.681949		0.418865	0.401695
	0.00621948	-0.265125	0.257235	0.412279	-0.0506259									-0.0967881	-0.392613	-0.171913		0.488883	0.0265441
	0.123067	-0.514345	0.13559	0.201772	-0.713527									0.284865	0.118923	-0.375997		0.210235	0.0507108
	0.0032141	-0.376744	0.491654	0.388342	-0.463098									0.0923853	-0.213654	0.645057		0.425484	0.436429
	0.233084	0.303447	0.528785	0.408932	-0.20819									-0.501288	-0.322774	0.118891		0.317615	0.223841
	0.0148161	-0.110134	0.110007	0.18931	-0.366108									-0.341616	-0.172184	0.168019		0.423677	0.232213
	0.200321	-0.0544362	0.409903	0.302394	-0.0519227									-0.115547	-0.387606	0.199105		0.355451	0.316889
	0.238653	-0.0298683	0.0942544	0.3411	-0.37841									0.0604008	0.364807	0.0488277		0.376356	0.0603332
	0.0706558	-0.0907472	0.341106	0.306482	-0.111558									-0.213393	-0.504559	-0.470806		0.304674	0.265003
	-0.0636017	-0.198654	-0.310875	0.170771	-0.0524307									-0.279169	0.306247	0.0724674		0.171282	0.187229
	0.345958	-0.284955	-0.309003	0.00220949	-0.423887									-0.148195	-0.39075	0.244976		0.257993	0.268824
	0.201996	-0.133496	0.335433	0.405381	-0.328563									0.17352	-0.626672	-0.567367		0.201523	0.33004
	-0.00393222	-0.148685	0.52526	0.265267	-0.40556									-0.2428	0.13314	-0.484362		0.145505	0.312197
	-0.147661	-0.0169149	-0.113036	0.480258	-0.111406									-0.212707	-0.208492	-0.0612965		0.472509	0.0868885
	0.0876235	-0.0640082	0.0259541	0.0384492	-0.0828005									-0.0635353	0.283535	-0.192154		0.107129	0.0950749
	0.342555	-0.198502	0.11922	-0.253325	-0.294814									-0.185415	0.339386	-0.130128		0.418385	0.115517
	0.194992	0.0404143	0.581199	-0.00573724	-0.374713									-0.234627	-0.184499	0.187156		0.0876434	0.486325
	0.28102	-0.150705	0.544106	0.302235	-0.217589									-0.265711	0.692871	0.269376		-0.0109533	0.48489
	0.294845	0.158452	0.055701	0.241653	-0.489445									-0.38477	-0.271083	0.51586		0.43976	0.484322
	0.14378	0.011883	-0.071365	0.0772466	-0.53873									0.055039	0.505896	-0.128619		0.238377	-0.0756398
	0.0933532	-0.431492	0.0981063	0.226932	-0.0610463									-0.13116	-0.310109	-0.346536		0.280425	0.391391
	0.436959	-0.10655	0.17863	0.246605	-0.0029627									0.00272448	0.469513	0.152282		-0.0287069	0.203673
	0.154362	-0.0896475	0.165913	-0.12053	0.0433063									-0.023558	-0.0162686	0.222784		0.209753	0.0402462
	-0.0713604	-0.235732	0.0211787	-0.370304	-0.174285									-0.175828	-0.489891	-0.043171		0.122968	-0.157591
	0.699549	-0.528627	0.368234	0.370639	-0.151001									-0.371936	-0.528671	0.316499		0.0374658	0.200272
	0.356455	-0.761483	0.175478	0.31122	-0.385579									-0.252311	-0.29768	-0.103568		0.06127	0.0833009
	-0.0330925	-0.71135	0.150383	0.283851	-0.169236									-0.162669	0.496979	-0.14764		0.346045	0.144386
	0.269811	-0.25919	0.511942	0.108772	-0.292049									-0.00745383	-0.261443	-0.0730158		0.35055	0.293733
	0.551325	0.109173	0.243346	0.0622285	-0.124943									-0.352278	-0.296382	-0.120199		0.0306714	0.289814
	0.182634	0.0218757	-0.202098	0.569725	-0.230899									-0.340772	0.243647	-0.157674		0.574476	0.236774
	0.37351	-0.099464	-0.0931386	0.117545	-0.423681									0.465939	-0.482959	-0.0045917		0.181363	0.240338
	0.124908	0.107324	-0.031329	0.338459	-0.201598									-0.116454	-0.147113	0.441834		0.148454	0.266116
	0.0536547	0.189468	0.311662	0.0447266	-0.443897									-0.244765	-0.0847347	0.448828		0.412975	0.308234
	0.306021	-0.260582	0.082966	0.267913	-0.531353									-0.018116	-0.410662	-0.163371		0.165381	0.119031
	0.33728	-0.81843	0.215241	0.541763	-0.448187									-0.298247	-0.254216	-0.240924		0.349525	0.598832
	-0.122826	-0.110792	0.40933	0.495272	-0.0661408									0.00276823	0.0552597	-0.194609		0.223557	0.384715
	0.237317	-0.0371421	0.418627	-0.0189614	-0.318142									-0.228984	0.24395	-0.142718		0.101779	0.205053
	-0.0957375	0.259272	0.559971	0.465405	-0.224515									-0.338435	-0.167023	-0.111459		0.12849	0.346726
	0.134868	-0.0792261	-0.0991953	0.146601	-0.305509									-0.164997	-0.470843	-0.210952		0.178709	0.462239
	-0.0845193	-0.159403	0.232095	0.00846746	-0.193472									0.293603	-0.322704	-0.132202		0.117633	-0.159283
	-0.197112	-0.126262	0.257762	0.00215121	-0.118955									-0.357801	-0.551819	-0.0928448		0.296882	0.25485
	0.159183	-0.493263	0.374761	-0.059764	-0.350401									0.0318169	0.542828	-0.176178		-0.00524214	0.115644
	0.298948	-0.00233394	-0.160073	0.200328	-0.25117									-0.371484	-0.159491	-0.063569		0.321262	0.629289
	-0.0216138	-0.208735	0.144579	0.082819	-0.327626									-0.0605328	-0.0226301	0.629019		0.359158	0.24756
	0.274997	0.0705822	0.186551	-0.0702367	-0.32382									-0.258155	0.17504	0.41566		0.600325	-0.144508
	0.317754	-0.147266	0.0564137	0.246833	-0.00686815									-0.00591372	0.0242007	-0.0225808		0.61685	0.386527
	-0.0917933	-0.0936453	0.187207	-0.0865834	-0.165794									0.144164	0.191378	0.133879		0.532763	-0.0120886
	0.407455	0.159879	0.103479	0.148707	-0.13205									-0.38963	0.234619	0.33312		0.16512	0.122465
	-0.000704768	-0.0816236	0.107384	0.167746	-0.105421									-0.112784	-0.123348	0.558268		0.464479	0.0871629
	0.193259	0.00525841	0.308556	0.376463	-0.335843									0.0576816	0.421356	-0.108051		0.55398	0.400543
	0.411832	-0.192557	0.277553	0.39603	-0.161161									0.0522269	-0.22265	0.0011147		0.120949	0.490356
	0.107313	-0.217781	0.375742	0.456565	-0.184154									-0.169059	-0.44446	-0.282358		0.106087	-0.0470788
	0.479925	-0.0633861	0.232424	0.284462	-0.0137693									0.0510605	-0.298357	-0.26556		0.419787	0.775992
	0.251747	-0.364151	-0.1114	0.00769644	-0.0185174									0.0196928	0.364515	-0.0499669		0.128152	-0.0496835
	0.299619	-0.0224701	-0.0147514	0.702613	-0.0126603									-0.105825	0.0735829	0.266581		0.23559	0.291259
	0.522546	-0.145579	0.136742	0.389757	-0.0449505									-0.102422	-0.0174869	-0.178036		0.0338851	0.109591
	0.315142	-0.214099	0.260783	0.533418	0.0525992									-0.245316	-0.150179	-0.111365		0.294175	0.498873
	0.23304	-0.483831	0.0159237	0.0248885	-0.599239									0.419291	-0.11438	0.122502		0.0938988	0.312568
	-0.236185	-0.367205	0.0606146	0.117724	-0.237091									-0.167339	-0.317019	-0.12218		0.169772	0.510819
	0.48007	-0.0247267	0.0433669	0.261974	-0.364738									0.0536954	0.385307	0.385463		0.335692	0.483875
	0.244807	-0.383633	-0.0700933	0.626662	-0.364786									0.30525	0.330097	0.00704883		0.146122	0.537512
	0.107852	-0.0560389	0.0240773	-0.0839765	-0.278592									0.030998	-0.17825	-0.111437		0.346527	0.620212
	0.241377	-0.356922	0.212017	-0.0917243	-0.108773									-0.11324	-0.166091	0.0490512		-0.128337	0.108757
	-0.0065067	0.197898	0.278544	0.227234	-0.000609762									-0.0638361	0.270884	-0.0515603		0.483328	0.413016
	0.312253	-0.276605	0.48778	0.199377	-0.344478									-0.344289	-0.0473568	0.184248		0.356005	0.549165
	0.253745	-0.0695811	0.497707	-0.0994783	-0.51505									-0.160891	0.0587162	-0.168295		-0.0539654	0.440964
	-0.255711	0.173178	0.344902	0.33989	-0.399952									-0.213243	0.0125741	-0.0690163		0.404077	-0.0553785
	0.205582	-0.374874	0.0989239	0.180475	-0.184502									0.46673	-0.132484	-0.472895		0.124378	0.254845
	0.164203	0.214404	0.320794	0.348347	0.024382									-0.127479	-0.0754274	-0.468645		0.364388	0.237984
	0.522127	-0.383703	0.411766	0.38029	-0.333248									0.425005	0.457985	-0.112657		0.412548	0.396013
	0.208219	0.130991	0.411644	0.0555721	0.0442331									0.42603	-0.267105	-0.0213241		-0.00495103	0.419185
	0.493138	-0.385063	0.352538	0.140978	-0.362894									0.0105545	-0.145039	0.111166		0.265735	-0.00350405
	0.0405264	0.522316	0.0197787	0.525746	-0.214612									0.360481	0.58562	0.481616		0.155136	0.0642238
	0.0558187	-0.138342	0.32184	0.408482	0.202001									-0.597279	0.410396	0.00786992		0.179789	0.104246
	0.201564	-0.186912	0.276607	-0.0638058	-0.114105									0.241795	0.443988	-0.0635581		0.552425	0.374277
	0.447826	-0.0751682	0.30197	0.0287547	-0.170317									-0.317843	0.386814	-0.328124		0.554107	0.0849131
	-0.186238	-0.354665	0.105637	0.24199	-0.647074									-0.251299	-0.0472592	-0.234763		0.467397	0.448251
	-0.156165	-0.284836	0.227595	0.408647	-0.530017									-0.40267	0.0938846	-0.439058		-0.051789	0.741786
	-0.157975	-0.0334032	0.0410831	0.452332	0.138449									0.249919	-0.185762	0.276098		0.15099	0.0565324
	-0.18647	0.136949	-0.0256686	0.474014	-0.295726									0.12073	0.374016	0.380483		0.293227	0.358022
	0.134618	-0.210752	0.351006	0.196433	0.224399									0.340927	-0.0691191	0.218627		0.0336403	0.523282
	0.236108	-0.25714	-0.295618	0.0998287	-0.219304									0.175386	0.369425	-0.00744234		0.23357	0.296907
	0.225763	0.0635571	0.376869	0.502694	-0.30174									-0.403999	-0.0560033	-0.253663		-0.058509	0.238235
	-0.222306	-0.53321	0.317606	0.163849	-0.206137									-0.532321	-0.379606	-0.367413		0.0970488	0.207782
	-0.0673111	-0.483842	0.221244	-0.0656843	-0.163373									0.0244205	-0.0899994	-0.156941		-0.0478501	0.414162
	0.291846	-0.364016	0.492614	0.10818	-0.175343									0.0280561	0.119661	0.440592		0.0925529	0.233594
	-0.114694	0.512751	0.435794	0.124362	-0.281394									-0.37999	0.0103818	0.296432		0.120685	0.195025
	0.429495	0.704079	0.626213	0.499906	-0.0856382									-0.431223	0.242253	-0.0647409		0.559609	0.311782
	0.404967	-0.0111546	0.161655	0.588898	0.0156516									-0.447863	0.393811	0.117887		0.244834	0.291619
	0.859965	-0.0777948	-0.105487	0.293893	-0.0040729									-0.17542	0.386218	0.485719		-0.113855	0.0817928
	0.440257	0.0793513	-0.137845	0.465488	-0.174933									-0.0870593	0.0573519	-0.204366		0.129529	0.355884
	0.557974	-0.152946	0.268531	0.397129	-0.268799									-0.188482	-0.319752	0.292437		-0.0157882	-0.0465664
	0.0648875	-0.554354	0.136983	0.241889	-0.199514									-0.0484985	0.468041	0.115653		0.0979794	0.0867566
	-0.194852	-0.0986598	-0.156707	0.256041	0.0745708									-0.320572	0.0542445	-0.40505		0.334074	0.344817
	0.497122	0.030274	0.114899	0.368781	-0.340544									-0.0410193	-0.496025	0.617987		0.324961	0.609944
	0.262675	0.105183	0.464872	0.13427	0.243567									0.0357122	-0.186765	0.0229486		0.85399	0.541474
	0.623239	-0.292345	0.180896	0.329947	-0.269002									0.388358	0.0053928	-0.00313664		0.267842	0.498083
	0.198629	-0.152288	0.689255	0.449765	0.27119									-0.237724	-0.369075	0.457371		0.115546	0.576069
	0.506243	-0.181914	0.105172	0.189055	-0.230054									-0.305548	0.181488	0.00256025		0.292307	0.448944
	0.0590303	-0.160843	0.00114606	0.467153	-0.0532666									-0.145802	0.164935	-0.0822997		-0.0226092	0.392791
	0.484298	0.124543	0.274126	0.344777	0.0708305									-0.241568	-0.341585	-0.0937357		0.336082	-0.0189782
	0.0742458	-0.112772	0.315217	0.491987	-0.108162									0.471444	-0.374884	0.291113		0.238568	0.174383
	0.174263	-0.184414	0.220873	0.0933966	-0.294796									-0.138041	0.293062	-0.362867		0.256447	0.372287
	-0.0866186	-0.252768	0.525546	0.636563	-0.134131									0.306488	-0.335468	-0.00386134		0.598842	0.340748
	0.477737	-0.24785	0.230927	0.475948	-0.149501									0.0805857	-0.125479	0.417324		0.468742	0.366193
	0.487418	0.560664	0.078375	0.264154	-0.222679									-0.637355	-0.304982	0.461294		0.583969	0.284948
	0.399854	0.0897888	0.665451	0.56443	-0.102077									-0.0814968	0.0327777	0.125338		0.0248335	-0.138911
	0.376424	0.173861	0.573721	0.156739	0.00578917									-0.205584	-0.11421	-0.0572838		-0.407822	0.178085
	0.344293	0.155005	0.424284	0.493535	-0.229353									-0.290697	-0.232406	0.274001		0.721198	0.160305
	-0.00996182	0.310491	0.0779371	0.0814889	-0.117133									-0.210856	0.332801	0.351451		0.383716	0.646036
	0.338373	0.158158	0.668206	0.0143073	-0.672765									0.0188768	0.124016	0.0812219		0.330644	0.663972
	-0.153209	0.197754	0.339453	0.037173	-0.234024									0.0321741	-0.0697643	0.420813		0.0437302	0.312105
	0.227846	0.213694	0.170589	0.489067	-0.0794219									-0.229974	-0.0290239	-0.140352		0.59097	0.0722179
	0.333259	-0.135334	-0.472618	0.0205698	-0.0555972									-0.321389	0.263037	0.00570622		0.231577	0.541418
	0.578572	0.105181	0.218497	0.27212	-0.482545									-0.375492	0.103143	0.486986		-0.103456	-0.508443
	0.0113708	-0.446804	0.253676	0.169765	-0.103517									-0.15556	0.116736	0.507077		0.292402	0.381441
	-0.132974	-0.315186	0.49548	0.345222	-0.188284									0.0613261	-0.262299	0.0171787		0.35239	0.149268
	0.179559	-0.253348	0.442801	0.154212	-0.0243359									-0.0269096	-0.117121	0.195086		0.432118	0.599871
	0.424653	-0.100816	-0.0277657	0.156317	-0.349651									0.296196	-0.494599	0.231001		0.0371265	0.487265
	0.163105	-0.4028	0.226715	0.0553419	-0.204551									-0.0393076	0.266546	0.0405447		0.170396	0.332237
	0.570608	-0.443958	0.0104573	0.0515369	-0.277332									-0.136596	0.224072	-0.0333279		0.204628	-0.245487
	-0.241226	-0.0153709	0.121746	0.0261802	-0.143767									-0.265763	0.0469583	-0.113859		0.410622	-0.0175556
	0.314571	-0.288437	-0.18493	0.280035	-0.000492057									-0.210628	-0.131355	0.243034		0.0155495	0.407616
	0.372275	-0.329682	-0.0561606	0.17531	-0.535813									-0.317659	0.374003	-0.206652		0.38814	0.419739
	0.471589	0.0554785	0.00628108	0.0920226	0.592584									-0.235811	-0.220422	-0.219097		-0.0134742	0.314975
	0.0907813	-0.180182	-0.515697	0.294018	-0.0590172									-0.0240387	0.784475	0.470208		0.15803	0.0165953
	0.135228	-0.543847	0.499501	0.250896	-0.345481									-0.26359	-0.119279	-0.0886778		0.601728	0.0839231
	0.369891	0.15559	0.0475086	0.141782	-0.383104									0.0715915	0.644146	0.214619		-0.0702832	0.613126
	0.227925	0.384063	-0.0135563	0.0979102	-0.0836433									0.617003	0.638438	-0.00627091		0.123306	0.622517
	-0.106274	-0.204446	0.686035	0.0852124	-0.310707									0.0251622	0.114987	-0.485893		0.270256	0.50609
	0.0743061	-0.120253	0.598578	0.411161	-0.156442									-0.0133276	0.336892			0.019902	0.585273
	-0.00125552	-0.327156	0.669813	0.553413	0.147388									-0.157277	0.062272			0.393379	0.354287
	0.625056	-0.503291	0.733246	0.255764	-0.0682281									-0.120252	0.107993			0.180197	0.496
	0.200354	-0.0953676	0.254746	-0.0731583	0.14621									0.0481358	-0.00262051			0.398601	0.410518
	0.043983	-0.547196	-0.0761977	-0.115667	-0.122574									0.645477	0.443609			0.270988	0.434847
	0.155408	0.0516856	0.0323327	0.309948	-0.0394975									-0.31197	-0.116133			0.0876222	0.0783713
	0.0624485	0.159844	0.447079	-0.169626	-0.261555									-0.0431134	0.527523			-0.0317872	0.046857
	0.274822	-0.403006	0.172959	-0.0249986	-0.0801797									-0.421582	0.380521			0.419333	0.336618
	0.0759566	0.200565	0.278075	0.367251	-0.479041									0.073462	0.269483			0.0251629	0.0835388
	-0.123293	-0.112607	0.0312549	0.326196	0.501048									-0.3885	0.229511			0.0200242	0.571091
	0.0992163	-0.0810827	0.348966	0.117033	-0.399856									0.223861	0.26684			0.0200214	-0.0487106
	0.0672185	-0.422721	-0.0121996	0.500909	-0.54797									-0.196329	-0.0308233			-0.0660496	0.430454
	0.349421	-0.141974	-0.010961	0.677827	-0.194466									0.0889134	-0.326531			0.126962	0.263602
	0.438801	-0.507864	-0.340023	0.357731	0.155621									0.152542	-0.301393			0.228979	0.429374
	0.149878	-0.0203891	0.214116	0.0760926	-0.163896									0.33092	0.244783			0.0538742	0.403925
	0.240997	-0.531016	-0.132344	0.295401	-0.00347421									0.146816	0.0618684			-0.235601	0.056601
	0.338135	-0.709088	-0.330178	0.440856	-0.220931									0.408778	0.59945			0.210515	0.34298
	0.341271	-0.227962	0.523758	-0.0518409	-0.34602									-0.141089	-0.37355			0.464342	0.38516
	0.247872	0.0341203	0.540296	0.0233286	-0.0498198									-0.0213218	-0.1636			-0.058394	-0.0241337
	0.434242	-0.734009	0.564815	0.403654	-0.349543									0.608592	-0.44911			0.230871	0.792311
	0.271227	0.243398	0.536549	0.353288	-0.128205									-0.329989	-0.40943			0.393081	0.204639
	0.281144	0.2639	0.205399	-0.0261879	-0.228195									0.0614143	-0.465885			0.319331	0.662337
	-0.12664	0.122143	0.333268	0.198562	-0.148401									0.139561	0.140066			0.0151324	0.0188684
	0.637366	-0.444068	-0.160631	-0.0846399	-0.257893									-0.451616	-0.378167			0.52314	0.456382
	-0.0594175	-0.0451616	-0.436706	-0.0867506	-0.0395086									-0.43998	0.0835887			0.35055	0.100247
	-0.0202808	0.55554	0.585049	-0.563754	-0.238314									0.000945101	-0.0167475			0.324118	0.521037
	0.334555	0.033929	-0.0490367	0.286943	0.147618									0.58295	0.096955			0.359623	0.12551
	0.319571	-0.326278	0.310836	0.133449	0.0125387									0.168413	-0.195616			0.159103	0.306475
	-0.0433862	-0.426924	-0.460129	0.265466	-0.29184									-0.0483825	0.163559			0.310469	0.570037
	0.220091	-0.12223	0.0231319	0.377624	-0.308455									-0.523591	0.0935816			-0.149702	0.273498
	0.210622	-0.134804	0.0644112	0.537282	-0.0577088									-0.240161	0.405578			0.138945	0.231052
	0.374807	-0.324704	0.0627554	-0.0712854	-0.382723									-0.204736	0.284624			0.0758889	0.174041
	0.302372	0.806132	0.183304	0.245571	-0.0269311									-0.682238	0.358761			0.104682	0.401634
	-0.0431078	-0.138727	0.448584	0.0108668	-0.0813937									-0.237629	-0.308542			-0.0745009	0.0400578
	0.279135	-0.34308	0.0113744	-0.00765611	-0.037079									-0.118551	-0.157359			0.192198	0.412112
	-0.0192809	0.163936	0.176584	0.350759	-0.472137									-0.0167694	-0.210884			0.222503	0.624252
	-0.324129	-0.316949	0.3451	0.0313556	-0.30477									-0.202241	-0.443725			0.416004	0.469915
	0.412403	-0.414087	0.380529	-0.0236951	-0.111622									-0.572303	-0.0331859			0.382887	0.258617
	0.0442643	-0.0457775	0.681155	0.264658	-0.0223527									0.512938	-0.390436			0.374362	0.557421
	0.181097	-0.40435	0.507248	0.0560384	-0.548376									-0.273336	-0.0909755			0.538324	0.303862
	0.352722	0.124398	-0.130975	0.251112	-0.129697									-0.0499802	0.263862			0.570169	0.382802
	0.470488	0.268518	-0.476703	0.0453366	-0.211497									-0.00170733	-0.198139			0.377406	0.42832
	0.135198	0.109725	-0.320767	0.0464609	-0.326959									0.684981	-0.0919507			0.0651712	0.36407
	0.238323	-0.279152	-0.0477413	-0.201515	-0.0821019									0.599593	-0.424356			0.535241	0.205175
	0.157359	0.147097	0.295945	-0.0282402	-0.27978									-0.115624	-0.184983			0.326695	-0.118028
	0.456406	-0.1718	0.238539	0.369537	-0.106598									-0.0640555	-0.309928			0.40082	0.454814
	0.501442	-0.360092		-0.0631406	-0.356661									-0.396945	-0.138933			0.33384	0.511075
	0.428448	0.0244271		0.166896	-0.0724616									-0.00591145	-0.232568			0.521916	0.298999
	-0.51105	0.314254		0.0235129	-0.283518									-0.417175	-0.33454			0.411771	0.245228
	0.163469	-0.340672		0.0277981	-0.366679									-0.0573757	-0.250586			0.366226	0.258115
	0.297008	0.350758		0.277482	-0.0477897									0.48234	0.662322			0.246405	0.630741
	0.781409	-0.225105		0.122974	-0.108091									0.127471	-0.497097			0.0181782	-0.0208166
	0.575265	0.218041		0.500188	0.107287									0.0756199	-0.151324			0.388156	0.24007
	0.123596	-0.183597		0.363879	-0.0303608									0.0134616	0.170436			0.399691	0.504023
	0.186387	-0.432194		0.298257	-0.226138									-0.0740282	0.0507733			0.125473	0.543598
	0.439868	0.0604034		0.451808	-0.389344									-0.229067	0.739166			0.882829	0.0380918
	-0.257962	0.0663986		0.127521	-0.214377									-0.194796	0.856536			0.441844	0.548511
	0.668243	0.197365		0.291472	0.558409									0.0267992	0.128757			0.815039	0.404951
	0.791229	0.119836		0.632456	-0.169122									-0.352827	-0.465526			0.243871	0.360807
	0.744515	-0.160519		0.24898	-0.0928867									-0.56409	0.00582568			0.26802	0.0454918
	0.495658	-0.550475		-0.0173733	-0.426296									0.114896	0.320315			0.412695	0.0270776
	-0.399202	0.477778		0.555783	0.00521374									-0.0907615	-0.0722763			0.452478	-0.0319254
	0.393513	-0.506016		-0.213918	-0.0575924									0.000110741	0.0594535			0.0211134	0.000948819
	-0.517494	0.0208967		0.461564	-0.491685									0.183615	-0.435354			0.22495	-0.0570907
	-0.239808	0.418396		-0.0238183	-0.0107235									-0.184079	-0.262166			0.233321	0.139053
	0.543518	-0.168411		-0.34238	0.35279									-0.0450702	-0.23407			0.772287	0.310874
	0.507874	0.595719		0.453825	-0.289916									-0.16112	0.598342			0.3474	0.0326148
	-0.120013	0.475712		0.37074	0.0393938									-0.296149	-0.567462			0.321665	0.131632
	0.500082	0.0383245		0.212454	-0.382925									-0.124196	-0.197133			0.270945	-0.0284039
	0.438511	-0.0854827		0.180987	0.0431971									0.208741	-0.299417			0.597934	0.0472092
	-0.0489673	-0.212909		0.0318368	-0.294176									-0.104987	-0.517228			0.377592	0.303479
	0.137224	-0.503184		0.639224	-0.0445634									0.102684	-0.208798			0.400297	0.149633
	0.00616018	-0.325905		0.467112	-0.361248									-0.397777	-0.682825			0.402385	0.507461
	-0.0605161	0.32999		0.246162	-0.433262									0.194096	-0.411048			0.669148	0.296463
	0.419087	-0.367286		0.28203	-0.333223									0.133511	-0.360054			0.149806	-0.0376671
	0.122573	-0.427401		0.369186	-0.00323649									0.167651	-0.182976			-0.0178711	-0.0480978
	0.309636	-0.0886477		0.496792	-0.156717									0.067834	0.136655			0.524307	0.234316
	0.58855	-0.0150068		0.65591	0.162622									-0.0589672	0.460678			0.0477841	0.490445
	0.269258	0.353149		0.275962	0.294636									-0.0309851	0.359729			0.337005	0.225305
	0.394389	0.66124		-0.0887632	-0.37096									0.527094	-0.294747			0.136529	0.557472
	0.250538	-0.543838		-0.057291	-0.158621									-0.291577	0.541615			0.199995	0.464171
	0.399676	0.0999907		0.432699	-0.241412									-0.199815	-0.12354			0.14871	0.401218
	0.644326	-0.70793		0.519429	-0.0311326									0.617101	0.0292438			0.265244	0.459085
	0.219011	0.125864		0.157235	-0.0915358									-0.187197	0.24753			0.3204	0.373002
	0.794026	-0.53871		0.022736	-0.337713									-0.0515849	-0.270997			0.172235	0.294351
	-0.23854	-0.344375		0.474477	0.0928331									-0.0808234	0.204738			0.508396	0.0570618
	0.326473	-0.154548		0.475839	-0.422546									-0.289315	0.176394			-0.38458	0.361581
	0.589884	-0.513288		0.127682	-0.0281215									-0.479718	-0.549451			0.0854651	-0.0186334
	0.271241	0.442512		-0.368422	-0.021438									0.581649	-0.0651596			0.452303	0.41047
	0.175921	-0.610466		0.213625	-0.0893078									-0.268322	0.371395			0.383352	0.318002
	0.541666	0.0225348		0.498183	0.0927411									-0.195	0.570675			0.377426	0.326971
	0.104137	-0.243607		0.512348	0.180016									-0.172377	0.225414			0.290642	0.347175
	-0.0828773	-0.735025		-0.0303502	-0.390661									-0.0942721	-0.15948			0.22569	0.519763
	-0.297615	0.0820963		0.1713	-0.502534									0.479397	-0.551086			0.00851944	0.292139
	0.12879	0.0345064		0.424641	-0.252585									-0.333102	0.231316			0.468328	0.431369
	0.514575	-0.113213		-0.130277	-0.150948									0.299588	0.469528			0.0347116	0.321657
	0.314378	0.0654495		0.18281	-0.213327									-0.270511	-0.290668			-0.180825	-0.206054
	0.287305	-0.0305168		0.485576	-0.153115									-0.174742	0.086069			0.377859	0.307996
	0.779508	0.571571		0.137548	-0.302979									0.00114051	-0.199143			0.346189	0.0573052
	0.673036	-0.0634628		0.59345	-0.303038									-0.446109	0.0447818			0.0112185	0.351921
	0.255819	0.113282		-0.207829	-0.376247									0.11042	-0.229668			0.122433	0.260829
	0.271374	-0.16015		0.293629	-0.242072									-0.0232607	-0.417929			0.0489121	-0.00994824
	0.365501	-0.414368		-0.0615368	-0.053534									0.489113	-0.285837			0.214042	0.115882
	0.448698	0.0354392		-0.0434161	-0.314537									0.420257	-0.106467			0.195653	0.604215
	-0.136756	0.280912		0.310617	-0.154544									0.481434	-0.457329			0.359607	0.0592677
	0.296149	-0.301551		0.0122582	0.030301									-0.171127	0.156644			0.262332	-0.110795
	0.447258	0.118206		0.304396	-0.0832216									-0.153083	0.574343			0.147589	0.24681
	0.392655	-0.175428		0.248282	-0.283503									-0.0210106	0.478925			0.413331	0.40678
	0.656083	-0.12348		0.361243	-0.442642									0.158082	0.0192569			0.130689	0.154276
	0.561949	-0.586848		0.300022	-0.372628									-0.215198	-0.0507399			-0.0277103	-0.0468161
	-0.158433	0.000817521		0.260254	0.199776									-0.0912163	0.298678			0.398608	0.444304
	-0.363329	-0.150226		-0.0337204	0.156181									-0.341196	0.139718			0.171512	0.0103222
	-0.0333554	-0.144457		0.49	-0.288106									0.0639666	-0.281483			0.242476	0.396679
	0.0385918	0.194633		0.573057	-0.288759									-0.54028	-0.440127			0.283346	0.191849
	0.102019	-0.592468		-0.0592877	-0.167525									0.133592	-0.465265			-0.34849	0.228917
	0.270447	-0.471846		-0.00411297	-0.427897									-0.0444663	0.124784			-0.0335857	0.0295906
	0.165082	0.254443		0.188473	-0.372706									-0.181279	-0.00440487			0.0878792	0.329079
	0.430506	-0.633873		0.475297	-0.396025									0.278399	-0.565685			0.0733464	0.360701
	0.07584	-0.231492		0.509138	-0.162435									-0.0320754	0.6815			0.0439176	0.231557
	-0.0947604	-0.219494		0.670785	0.41835									0.343636	-0.0321296			0.0946951	0.386117
	0.164402	-0.629272		0.22149	-0.0929424									-0.12222	0.173131			0.017379	0.280261
	0.655197	0.152279		0.268926	0.162912									0.0471164	-0.0423313			0.0222369	-0.0401561
	0.306044	-0.214304		0.0821135	-0.215653									-0.204857	-0.204296			0.0932794	0.108589
	0.375779	-0.295027		0.506861	-0.203852									0.0816608	0.142585			0.0150613	0.435914
	-0.0970635	-0.366031		0.0609238	-0.0560589									0.124755	-0.390531			0.0855183	0.0745958
	0.378858	0.0106679		0.290009	-0.185769									0.37967	-0.221858			-0.322374	0.366171
	0.17665	0.245928		0.0597807	-0.468234									-0.332302	0.505629			0.241873	0.394287
	0.0842939	-0.181489		0.180427	-0.260888									-0.290116	-0.0766037			0.106053	0.236484
	0.148616	-0.332133		0.00432765	-0.213335									0.155374	-0.199563			-0.353688	0.0910748
	0.501482	-0.164778		0.354123	-0.338173									-0.118732	0.175992			0.290395	0.10474
	0.530418	-0.416532		0.300091	-0.0446259									-0.119865	0.364818			0.930165	0.267793
	0.126302	-0.405133		0.210036	-0.1883									-0.213934	0.275801			0.397611	0.33019
	0.438434	-0.0373406		0.00395272	-0.109424									-0.133121	-0.0616715			0.63488	0.142473
	0.254503	-0.103198		0.271142	-0.155211									-0.0634081	-0.0519474			0.0587306	-0.00196982
	-0.395417	0.28178		0.219157	-0.434005									0.281822	-0.0243009			0.00777579	0.236026
	0.408514	-0.397919		0.0700045	-0.399903									-0.201609	-0.101224			0.348097	0.207441
	-0.0561192	-0.411736		0.222064	0.0122276									-0.294941	-0.239689			0.400589	0.413051
	0.482812	-0.442158		0.0684582	-0.0671287									-0.228634	-0.294265			0.179611	0.249897
	0.459098	0.43869		0.169265	-0.188789									-0.277981	-0.625227			0.354437	-0.0178648
	0.499664	-0.0425824		-0.0453471	-0.262818									0.038563	0.142659			0.185742	0.130265
	0.230061	-0.350644		-0.305561	-0.302725									-0.0940476	-0.141655			0.400422	0.526675
	0.343426	0.44848		0.150125	-0.186151									0.395124	-0.229152			0.404253	0.323933
	0.284595	-0.336536		0.346651	0.14035									-0.364552	-0.195237			0.126861	0.316327
	0.432545	0.0869214		0.0332923	-0.279085									0.0173901	-0.143035			0.0976474	0.318731
	0.435396	0.22476		-0.0685447	-0.512058									-0.0791396	-0.115172			0.155343	0.201211
	-0.0413921	-0.380969		0.211726	-0.669527									0.518429	-0.200363			0.281256	0.140056
	0.47265	-0.412006		0.0403771	-0.406479									-0.465839	-0.270684			0.348398	0.344827
	0.440125	-0.143879		0.670018	-0.406801									-0.373715	0.0940895			0.245323	0.314685
	0.674932	0.477342		-0.0206443	-0.444602									0.289696	-0.0274796			-0.0434165	0.232833
	-0.121498	-0.57026		0.0495783	-0.422022									-0.394181	-0.282607			0.399685	0.426665
	0.240941	-0.123275		0.126409	-0.265831									0.0631916	-0.150905			0.0552759	0.295075
	0.090756	-0.277334		0.374984	-0.0386877									-0.365985	0.311266			0.0395928	0.342588
	-0.0176131	-0.590767		-0.304841	-0.276313									-0.193968	-0.477821			0.253406	0.493001
	0.361342	-0.710991		0.223848	-0.387634									-0.314006	0.0829163			0.870531	0.199835
	0.309899	0.054278		-0.0205085	-0.213824									-0.430495	0.0353999			0.20281	0.436016
	0.284312	-0.410423		0.436371	-0.33211									-0.308934	-0.137529			0.307717	0.474179
	0.180054	0.0434112		-0.0189006	-0.296594									-0.0683217	-0.317564			0.213617	-0.0511668
	0.27475	-0.608249		-0.00670509	-0.562731									-0.403312	-0.422731			0.334512	0.370034
	0.0659708	-0.364471		-0.0136858	-0.435955									-0.0526634	-0.140206			0.146778	0.2455
	0.381981	-0.651311		0.14715	-0.63885									-0.403396	-0.398462			0.314261	0.296647
	0.536595	-0.374289		0.477393	-0.371772									-0.41551	-0.290318			-0.248721	0.703987
	0.152601	0.0463947		0.782034	-0.241072									-0.180861	0.638954			-0.206845	0.549353
	0.418662	-0.220499		0.175039	-0.175909									8.52757e-05	-0.484661			0.558081	0.335565
	0.569617	0.435057		0.197482	-0.18866									-0.162829	-0.244401			0.161261	0.133783
	0.000118788	-0.502131		-0.0507637	-0.260274									-0.0628589	-0.384571			0.244247	0.477521
	-0.269292	-0.573728		0.253441	-0.138545									-0.00436117	-0.512865			0.123022	0.284586
	-0.166919	-0.259847		0.15808	-0.0192147									-0.326266	-0.367787			0.189765	0.166399
	0.485774	-0.551779		-0.0138122	-0.267459									-0.501405	-0.309686			0.256616	0.505268
	0.448147	-0.611766		0.242946	-0.0540731									0.191433	-0.297444			0.191948	0.654878
	0.654671	0.199465		-0.0245924	0.277223									-0.211794	-0.186859			0.535075	0.288818
	0.506052	-0.506964		0.373982	-0.384472									0.071763	-0.182985			0.0421039	0.600791
	0.00889746	0.302625		-0.0234417	-0.233255									-0.0905541	-0.141939			0.110395	0.304539
	0.87759	-0.299391		0.385785	0.201395									-0.13237	-0.384554			0.679151	0.199806
	0.283673	-0.212947		0.726731	-0.325311									-0.261231	-0.406499			0.204742	0.430777
	-0.0959509	-0.627023		0.190596	-0.276233									0.0221899	-0.00532135			0.250676	0.0362585
	-0.0305358	-0.580085		0.226662	-0.258848									-0.188896	-0.388445			0.485694	0.131201
	0.115996	-0.114595		0.48542	-0.0457147									-0.333679	-0.197828			0.292017	0.188254
	0.145004	0.031208		0.359429	-0.468123									-0.195342	-0.0625751			0.0117794	0.017854
	0.45464	-0.45983		0.380769	-0.166842									-0.252141	0.588242			-0.0259443	-0.0612971
	0.617426	-0.0528035		0.231331	0.0942313									0.392537	-0.282766			0.181198	0.258936
	0.615695	-0.398632		0.419235	-0.242586									0.322046	-0.30819			0.360717	0.0998063
	0.233746	-0.202888		0.249917	-0.315767									0.00223725	-0.102802			0.278552	0.19861
	0.0514886	0.0164119		0.295738	0.11883									0.00749166	0.373904			0.328446	0.0453785
	0.0258417	-0.197809		0.215305	-0.254753									-0.407717	0.114066			0.188064	0.145053
	0.167725	-0.0658426		-0.0686077	0.0133819									-0.0723516	-0.065446			0.182663	0.310892
	0.190081	-0.0203397		0.141663	-0.198536									0.0444248	-0.126934			0.298679	0.32969
	0.218601	0.381073		0.327232	-0.352695									-0.0455525	-0.00434612			-0.0552564	0.316717
	0.474851	0.0062485		0.278512	-0.123599									-0.228889	-0.119454			-0.0855734	0.493483
	0.52576	0.231932		0.42851	-0.390476									0.0324863	0.58232			-0.00403646	0.433077
	0.243605	-0.0801278		-0.0335028	-0.455755									-0.246449	-0.373063			0.338307	0.346549
	0.327989	-0.59879		0.201978	-0.304464									-0.0858359	0.3207			-0.0383156	0.185628
	0.369033	-0.369844		0.197235	0.0686373									0.519575	-0.278163			0.548287	0.40947
	0.630571	-0.603936		0.713908	-0.138323									-0.0253661	0.497137			0.385814	0.312903
	-0.126337	0.448702		0.52924	0.029465									0.321498	0.523772			0.503869	0.31326
	0.430763	0.451692		0.293133	-0.393273									0.178704	-0.402271			-0.154928	0.228861
	0.376373	-0.153941		-0.0835171	-0.0691885									-0.264513	-0.338234			-0.299462	0.47479
	0.540535	0.0715905		0.33262	-0.326201									-0.300788	0.00831068			0.147446	0.454321
	0.368347	-0.331747		-0.0650738	-0.357541									-0.199869	0.242892			-0.034568	0.638793
	0.580503	0.105821		0.240143	-0.345703									0.0596179	0.240164			-0.0030081	0.423432
	0.20825	0.0594968		0.291927	-0.254285									0.141476	0.0414613			0.345921	0.394796
	0.427405	0.658404		0.215329	-0.373665									-0.291839	0.130434			0.0563216	-0.097579
	0.431649	-0.251913		0.287874	-0.524593									0.0504827	-0.240162			-0.257466	0.325365
	0.0985148	-0.217929		-0.26154	-0.0703604									-0.129099	-0.395571			0.524977	0.237409
	-0.0572435	0.651089		0.315104	-0.0722938									-0.341175	-0.344074			-0.0696938	0.24331
	-0.465562	-0.260194		0.210892	-0.270813									-0.09953	0.251952			0.243344	0.445032
	0.391673	-0.171158		0.0413894	-0.0064888									0.556519	-0.472072			0.141958	0.162744
	0.187416	-0.0430087		0.0404344	-0.256305									0.186587	-0.30757			0.147541	-0.158955
	0.0908637	0.37684		0.536617	-0.323701									0.161322	0.0860619			0.267793	0.384229
	0.909021	0.14543		0.389642	0.00837169									-0.326837	0.0144871			0.0745092	0.317064
	0.635394	-0.0961243		0.12427	-0.0223853									-0.311895	-0.0906048			0.396511	0.232198
	0.164332	0.266122		0.258532	-0.0530526									-0.429061	-0.165856			0.534794	0.617472
	0.0193279	0.141483		0.327184	-0.436549									0.0219585	-0.17247			0.662834	0.209339
	0.582526	0.173618		0.317238	-0.243096									-0.134095	-0.0511344			0.441925	0.533956
	0.556102	0.603359		0.482169	-0.495383									-0.343091	-0.493765			0.43701	0.560319
	0.587252	-0.528965		0.342726	-0.068369									-0.363423	0.231854			0.0399181	0.574582
	0.151937	-0.562782		0.286667	-0.156019									-0.0823506	0.309647			0.612931	0.138457
	0.89266	0.64213		0.610496	-0.3191									0.12392	0.267741			0.228163	0.171979
	0.345899	-0.628292		0.294563	-0.0303376									-0.222568	0.234324			0.645249	0.219443
	0.128882	-0.268574		0.235749	-0.208671									-0.0908398	-0.291411			0.470066	0.186325
	0.357609	-0.549059		0.273835	-0.32372									-0.0585656	-0.302477			0.433501	0.316275
	0.521314	-0.561548		0.245605	0.00869529									-0.0918467	-0.067547			0.645299	0.0631227
	0.961613	0.275986		0.353943	-0.27218									0.400706	-0.23278			-0.0125941	0.0263348
	0.415754	-0.1991		0.47658	-0.191636									-0.00309327	0.0488484			0.537012	0.0782929
	0.343132	0.0332858		0.291741	-0.372998									-0.070799	-0.449854			0.292257	-0.0307961
	0.0102951	0.0167481		0.305356	-0.431067									-0.25612	0.0969107			0.414345	0.200597
	0.239963	0.353897		0.4289	-0.466336									0.415655	0.622661			0.54801	-0.00568083
	0.74851	-0.341501		0.444326	-0.234876									-0.234572	-0.171427			0.325657	0.342135
	0.452403	0.343713		0.532028	-0.452839									0.0373868	0.199458			0.362051	0.498751
	0.0984841	-0.564278		0.170778	0.279058									0.349917	-0.149914			0.159706	0.318779
	-0.190529	-0.266972		0.548443	-0.0450578									0.499336	-0.432745			0.213079	0.171521
	0.333582	-0.421296		-0.318896	-0.479134									-0.242566	0.338416			0.505959	0.314426
	0.820677	-0.660211		0.253888	-0.358553									-0.295964	0.102028			0.538171	0.122652
	0.381186	-0.42311		0.383101	-0.327768									-0.378376	-0.804819			0.268978	0.554879
	-0.33094	-0.45548		0.284051	0.0177942									0.178151	0.00929416			0.488357	0.450594
	0.451364	-0.305418		0.572601	-0.295474									0.381432	-0.0369063			-0.0475872	0.496907
	-0.0987637	0.116519		0.0461778	-0.0827175									-0.158821	-0.619801			0.0403819	-0.0235084
	0.519653	-0.308178		0.320896	-0.169048									0.334129	-0.510817			0.5002	0.524827
	0.0233735	0.213654		0.1061	-0.205529									0.588371	0.00206978			0.324742	0.0182509
	-0.139433	-0.0218338		0.362365	-0.0694529									0.0598883	0.202638			0.568804	0.537615
	0.797578	-0.175709		0.0262133	-0.304353									-0.299993	0.0149897			0.313401	0.558113
	-0.342348	0.652898		0.448196	-0.241274									-0.308661	-0.188591			0.552128	0.0852569
	0.399778	0.301543		0.33515	-0.44374									0.150397	0.0081528			0.463599	0.233574
	0.392813	-0.284385		0.476244	0.143607									-0.106836	0.208085			0.256024	0.266364
	0.281058	0.692061		0.483188	-0.407642									-0.200874	-0.550434			0.77871	0.106703
	0.0329963	-0.271578		0.266556	-0.209702									0.394553	-0.0656717			-0.0534574	0.587628
	0.242034	-0.64217		0.518273	0.0918952									0.330701	-0.184137			0.250452	0.40006
	-0.428153	-0.159169		-0.404585	-0.120696									0.066209	-0.410573			0.181466	0.0705928
	0.0811181	0.646628		0.276884	-0.233469									0.342043	-0.329527			0.54928	0.345115
	0.223878	-0.181717		-0.0899026	-0.519312									0.300142	0.0340836			0.76492	0.10944
	0.515372	0.0796611		0.245755	-0.32125									0.247273	0.273948			0.728104	0.15671
	0.182834	-0.443479		0.280719	-0.0162664									-0.216005	-0.474463			0.314519	0.391842
	0.45072	-0.572132		0.349462	0.24176									-0.358378	0.126512			0.444259	0.112685
	0.200322	0.470477		0.0318646	-0.203536									-0.405758	0.257453			0.00715331	-0.0388751
	0.303087	-0.262379		0.102812	-0.0748142									-0.1228	0.114251			0.475977	0.393047
	0.190461	-0.0939033		0.477743	-0.286486									0.0475443	-0.393537			0.760637	0.462156
	-0.499702	-0.294515		0.359903	-0.24791									-0.5873	-0.0358772			0.592083	0.5148
	0.527441	-0.375541		-0.273243	0.291185									-0.250973	-0.163066			-0.0220698	-0.081937
	0.117463	-0.412725		0.0887212	-0.22201									0.631316	0.0211744			0.63184	0.343416
	0.216406	-0.264116		0.283831	-0.346208									-0.328643	0.0112702			0.202887	0.181392
	0.312771	-0.472964		0.300042	-0.200602									0.179402	-0.280694			0.486334	0.453603
	0.118876	0.191966		0.393383	-0.104804									-0.232434	-0.117192			0.459001	0.624607
	-0.00603284	-0.465497		-0.00776924	-0.468119									-0.558214	-0.101133			0.485354	0.0609182
	0.316801	-0.253976		-0.170447	-0.246147									-0.517402	-0.0657255			0.364762	0.0461529
	-0.000380655	0.27269		0.379902	-0.334347									-0.18444	0.463967			-0.119962	0.197929
	0.168545	-0.221408		0.414023	-0.283225									-0.452532	0.0449517			0.568574	0.438212
	0.0845494	-0.0356517		0.209957	-0.338072									-0.177634	-0.173292			0.641046	0.556548
		0.107394		-0.161184	0.54444									0.0985908	0.174044			0.750763	0.216543
		0.186466		0.15659	-0.344875									-0.0718613	-0.476864			0.123768	0.375044
		0.105342		0.462908	-0.427591									0.187748	-0.163879			0.120411	0.344131
		-0.432835		0.16358	-0.0881732									-0.210634	-0.234379			0.104842	0.169994
		0.168148		0.314545	0.0736921									-0.496177	-0.102638			0.223352	0.59161
		0.0401225		0.456475	-0.00169637									-0.0717681	-0.293213			0.516907	0.410956
		-0.225005		0.028083	-0.218968									0.024342	-0.138134			0.411854	0.587174
		-0.334861		0.73123	-0.358273									-0.356549	-0.0431775			0.508843	0.081264
		-0.0598522		0.242933	-0.244404									-0.00402108	-0.404781			0.59149	0.276775
		-0.85315		0.491741	0.684107									-0.20224	0.171723			0.243094	0.462925
		-0.59182		0.316189	-0.531034									-0.518761	-0.260438			0.382926	-0.0259911
		-0.123319		0.227781	-0.198339									0.402101	-0.344852			0.473835	0.504191
		0.00233384		0.400547	-0.232342									0.113445	-0.492169			0.501865	0.211911
		-0.405553		0.145701	-0.201811									0.18698	-0.269906			0.401039	-0.102818
		-0.0297292		0.0791599	-0.472547									-0.0603137	0.112965			0.325729	0.589821
		0.0654221		0.278598	-0.0588978									-0.189845	-0.115132			-0.0624103	0.365198
		0.201198		0.0943492	-0.0967045									-0.33206	-0.0448412			0.00551683	0.438266
		0.228517		-0.203481	-0.431007									0.352798	0.472252			0.210358	0.556888
		-0.557937		0.0221031	-0.306131									-0.132354	0.347077			0.500638	0.7468
		-0.393888		0.032448	-0.366764									0.180006	0.178595			0.354724	0.0919132
		0.127407		-0.105291	0.0194024									-0.226662	-0.0267956			0.0369757	0.701369
		-0.88109		0.00820818	-0.648592									-0.0045516	0.80949			0.25004	0.464545
		0.176615		0.199709	-0.227496										0.357089			0.195938	0.526657
		-0.0973753		-0.039852	-0.0994432										0.79792			0.473136	0.422246
		0.0585587		0.297897	-0.0125882										-0.456697			0.568479	0.0231065
		-0.470296		-0.0603433	-0.157694										0.672209			0.437796	0.491945
		0.298574		0.477354	-0.181154										0.0128882			0.169856	0.343439
		-0.473141		0.343453	-0.435712										-0.27889			0.377793	0.429035
		0.253827		-0.111349	-0.380089										-0.54248			0.522721	0.240102
		-0.609328		0.345828	-0.67753										0.125235			0.397001	0.0637919
		-0.345879		0.197686	-0.63897										0.120495			0.3735	0.205769
		-0.417744		0.274626	-0.355862										-0.0850918			0.53914	0.0185725
		-0.0422564		0.332387	-0.330486										-0.744433			0.242349	0.192399
		-0.0222479		0.377734	-0.179963										0.867399			0.238077	0.328014
		0.278331		0.386899	-0.268048										0.17555			0.580645	0.386012
		0.118196		0.581493	-0.666493										0.220027			0.287823	0.135174
		-0.62327		0.419745	-0.32387										0.255857			0.384335	0.281188
		-0.440364		0.144739	-0.220964										-0.38731			0.477181	0.54046
		0.377767		0.25986	-0.377915													-0.020088	0.379812
		0.222793		-0.0204296	-0.561649													0.360765	-0.0978711
		-0.476068		0.354037	0.203764													0.776298	0.522784
		-0.416015		0.0815105	-0.157542													0.192452	0.26869
		-0.649364		-0.277016	-0.386908													0.287349	0.329417
		-0.160438		0.596222	-0.311172													0.645227	0.157961
		0.293881		0.248884	-0.0749479													0.0781054	0.402667
		-0.159523		0.365738	-0.0866773													0.628992	0.266548
		-0.580283		-0.12232	-0.272569													0.615112	0.624977
		-0.306059		0.365975	-0.134303													0.146906	0.140798
		-0.714742		0.137131	-0.448693													0.469914	0.297042
		-0.103448		-0.0644906	-0.337696													0.402544	0.24486
		-0.359118		0.246583	0.154527													0.730584	0.421497
		-0.585595		0.0734134	-0.235961													0.149014	0.396876
		-0.0686653		0.193519	-0.27296													0.363424	0.220056
		-0.573582		-0.0316011	-0.0537515													0.284286	0.321409
		-0.712217		-0.124046	-0.231497													0.517184	0.367531
		0.0816722		-0.0504526	0.0305295													0.276841	-0.22111
		-0.360943		0.165607	-0.306028													0.193357	0.0193799
		-0.105645		0.47942	-0.0110435													0.16933	0.280378
		-0.100912		0.531851	-0.499631													0.193868	0.874313
		-0.358097		0.343101	-0.0161588													0.421175	0.00292079
		0.177743		0.261145	-0.0612773													0.559411	0.0342659
		0.140724		0.0503858	-0.173179													0.0940118	0.19094
		0.318101		0.261546	-0.440869													0.278159	0.402188
		0.158291		0.0112967	-0.375139													0.353304	0.385203
		-0.499563		0.290465	-0.2945													0.266886	0.432365
		-0.0600345		0.233029	-0.0644831													0.407258	0.445525
		-0.294277		-0.0355596	-0.155096													0.525589	0.0637933
		-0.54113		0.437745	-0.243201													0.245548	0.000846541
		-0.382039		0.542704	-0.530878													0.60213	0.0882644
		0.200469		0.599359	-0.325407													0.209874	0.0254022
		-0.324005		0.518493	-0.511546													0.382857	-0.00310371
		-0.472318		0.0115914	-0.36705													-0.0215438	0.278042
		-0.327054		0.59416	-0.193197													0.497143	0.393205
		-0.268458		0.14009	-0.575623													0.574196	0.280921
		-0.668215		0.0508465	-0.418171													0.557518	0.573876
		-0.545036		0.622034	-0.502091													0.529777	0.281713
		-0.0280374		0.254226	-0.295828													0.118826	0.415243
		-0.356956		0.283396	-0.0403374													0.282427	0.041129
		0.0833421		0.231259	-0.0151069													0.373264	0.158459
		-0.276974		0.413046	-0.409723													0.208386	0.690268
		-0.395282		0.07229	-0.26682													0.197294	0.460975
		0.159463		0.201861	-0.193464													0.219937	0.0648408
		-0.431863		0.1137	0.064831													0.521078	0.573784
		-0.292758		-0.0331519	-0.505284													0.307913	0.218668
		0.0665827		0.386155	0.026008													0.386601	0.292419
		-0.242351		0.517728	-0.470537													0.192887	-0.097515
		0.264895		0.569451	0.00474865													0.442054	0.373958
		0.345669		0.54252	-0.253972													0.357902	0.1078
		0.0880427		0.505391	-0.34173													0.0452428	0.258258
		-0.184306		0.254532	0.108513													-0.257097	0.259434
		-0.209416		0.211432	-0.137521													0.238634	0.113479
		0.795859		0.507384	-0.391859													0.31536	0.380933
		-0.200867		0.241338	-0.361757													0.150227	0.432348
		-0.375826		0.454384	-0.222262													0.397649	0.0317007
		-0.460752		0.169655	-0.408908													0.351175	0.15367
		-0.0516884		0.606388	-0.333072													0.0661318	0.382599
		-0.156822		0.0327054	-0.416551													0.218029	0.268554
		0.184769		0.135777	-0.269252													0.219542	-0.162451
		0.297858		0.213286	-0.597341													0.269914	0.336491
		0.245226		-0.0248336	-0.147203													0.194894	0.441239
		-0.546827		0.207803	-0.26307													0.754448	-0.0187301
		-0.739043		0.312107	-0.333463													0.204417	0.370839
		-0.528249		0.0680534	-0.319828													0.288302	0.00332764
		0.221739		0.123884	-0.20582													0.20194	-0.105142
		-0.150362		0.299573	-0.25496													0.225392	0.467083
		0.37144		0.156409	-0.354719													0.93209	0.409673
		-0.147915		0.448182	-0.127186													0.631193	-0.0220388
		-0.7378		0.0574456	-0.487815													0.301794	0.354552
		-0.525776		0.114392	-0.591815													0.0731266	0.432542
		0.00423606		0.689677	-0.306562													0.270529	0.200614
		-0.63036		0.0599581	-0.388316													0.0951604	0.422268
		0.30645		0.0787314	-0.357081													-0.0372397	0.21824
		-0.758289		-0.0799906	-0.608496													0.520477	-0.133336
		-0.837126		-0.0244098	-0.346644													0.0828918	0.462155
		0.0298104		-0.0835946	-0.0961889													0.467932	0.50795
		0.182528		-0.0566156	-0.555338													-0.141209	0.504278
		-0.651256		0.391613	-0.331322													0.0498311	0.0183319
		-0.842129		0.47807	-0.330543													0.424691	0.487284
		-0.389913		-0.0111503	-0.456043													0.724203	0.305255
		-0.144734		0.0961157	-0.273448													0.00954989	0.172251
		-0.00919668		0.0283112	-0.708035													0.370146	0.427104
		0.0363321		0.115564	-0.287505													0.406287	-0.124368
		-0.597319		0.370837	-0.263218													0.197716	0.379189
		-0.758691		-0.0209697	-0.192062													0.59941	0.118742
		-0.387674		0.560963	-0.263293													0.505963	0.0166056
		-0.20647		0.143366	-0.0651258													0.217492	0.551107
		-0.703805		0.25679	-0.111157													0.0182164	0.189021
		-0.461284		0.376714	-0.353113													0.495556	0.526517
		0.152341		0.411173	-0.0862855													0.269033	0.519382
		-0.0203326		0.663658	-0.236507													0.187185	0.398955
		0.0015969		0.150445	-0.419699													0.54846	0.309695
		0.309597		0.36656	-0.506854													0.646531	0.111102
		-0.216808		0.451325	-0.466818													0.249448	0.430379
		-0.468402		0.110844	-0.11326													0.143387	0.601627
		0.484697		0.310432	-0.777429													-0.0285918	0.397319
		-0.356801		0.0629631	-0.633483													0.256086	0.209828
		0.115386		0.311653	-0.461457													0.547604	0.169232
		-0.406128		0.247634	-0.263222													0.220173	0.180381
		0.0223258		0.0122392	-0.139026													0.00768342	0.45826
		-0.227432		0.50973	-0.141878													0.394933	0.304605
		-0.391112		-0.00725237	-0.30135													0.308044	0.139935
		-0.00604707		0.317804	-0.23469													0.321818	0.412223
		0.074456		0.530865	-0.14258													0.0225374	0.0268751
		0.0421899		0.429439	-0.518142													0.382812	0.0659212
		-0.58495		0.037413	-0.143471													-0.0450467	0.625434
		0.144099		0.409906	-0.407029													0.388862	0.552958
		-0.0447469		0.00797618	-0.414949													0.0359341	0.292584
		-0.291177		0.0471989	0.310664													-0.0419043	0.217075
		0.733857		0.214577	-0.731672													0.19641	0.356189
		-0.162275		0.246887	-0.145248													0.451733	-0.00931848
		-0.188494		0.239127	-0.389665													0.0194242	0.484282
		-0.208808		0.456838	-0.38463													0.432565	0.461863
		-0.513815		0.633486	-0.294658													0.128536	0.302539
		0.0296307		0.301391	-0.191963													0.164634	0.520122
		-0.303098		0.0290779	-0.429035													0.0770953	0.561005
		-0.250625		-0.00159222	-0.434724													0.489708	0.132091
		-0.453205		0.509973	-0.385576													0.550776	0.0832035
		-0.220535		0.685267	-0.334571													0.707287	0.23282
		-0.194702		0.241963	0.283362													-0.0923737	0.394593
		-0.0750062		0.503837	-0.322591													0.116422	0.291938
		0.076517		0.510044	-0.379537													0.357303	0.297733
		-0.325046		0.531512	-0.618514													0.0801292	0.196452
		-0.427262		0.725549	0.0897962													0.220836	0.0946061
		0.322789		0.252503	-0.375201													0.694976	0.480227
		0.0769906		0.429112	-0.110439													0.0682993	0.215828
		0.285861		-0.0015025	-0.444456													0.786527	0.0462266
		-0.087508		-0.00809089	-0.492776													0.360412	0.375132
		-0.283467		0.365454	-0.133478													0.21889	0.0704741
		-0.454781		0.09453	-0.475035													0.633564	0.127615
		0.26613		-0.0307278	-0.159523													0.392553	0.0427631
		-0.158629		0.315538	0.0833369													0.0496949	0.521915
		0.324192		0.668025	-0.32639													0.0657336	-0.0201325
		0.367966		0.0726551	-0.584453													0.0355954	0.493451
		0.300961		0.500083	-0.209121													0.230168	0.0190399
		0.678757		0.378607	-0.312156													0.398809	0.342474
		-0.617959		0.0356286	-0.235366													0.145949	0.0171597
		-0.107332		0.507999	-0.264406													0.233774	0.0418242
				0.490381	-0.316578													0.0182302	0.182492
				0.466671	-0.0556142													0.564074	0.511017
				0.107471	-0.0138751													0.0509129	0.34172
				0.708677	-0.393314													0.169475	0.436287
				0.0625757	-0.311265													0.386297	0.27435
				0.335972	-0.356868													0.669456	0.440721
				0.541547	0.178943													0.360702	0.536334
				0.0400098	-0.217369													0.0464467	0.429265
				0.360772	-0.113194													0.61428	0.165489
				0.0791212	-0.497448													0.369372	0.489091
				0.671297	-0.0467783													0.374989	0.132946
				0.0430662	-0.491263													-0.237403	-0.0118034
				-0.0338149	-0.567096													0.594916	0.66771
				0.376153	-0.719414													0.245578	0.135895
				0.0297369	0.0554529													0.0461759	0.737597
				-0.164031	-0.413648													0.38541	-0.34545
				0.738259	-0.414186													0.183106	-0.0549862
				0.00072048	-0.0269952													-0.0452098	0.84301
				0.336895	-0.0722404													0.387432	-0.0176837
				0.0203554	-0.0679816													0.526822	-0.126654
				0.440723	-0.118629													0.529481	-0.377736
				0.0290613	-0.257599													0.27474	0.100929
				0.0825256	-0.423727													0.470502	0.330553
				-0.0085261	-0.480057													0.602816	0.21492
				0.390672	-0.103564													0.575042	0.351576
				0.210703	-0.16944													0.152625	0.0586767
				0.317938	-0.354029													0.382607	0.591595
				0.222026	-0.439159													0.150137	0.016397
				0.11723	-0.0563429													0.132604	0.699496
				0.0434693	-0.127881													0.287384	0.334066
				0.200468	-0.532045													0.126805	0.624402
				0.266165	-0.0364331													0.736253	0.661958
				0.536448	-0.348891													0.121982	0.561921
				0.57958	-0.0775132													0.116525	0.470344
				0.408095	-0.298094													0.611888	0.23789
				0.375044	-0.104633													0.329504	0.413052
				-0.0363068	-0.229009													0.149617	-0.454389
				-0.0908501	-0.0841119													0.526957	0.54472
				-0.0713743	-0.0077323													0.451487	0.564528
				0.541283	-0.114163													0.141196	-0.142791
				0.410887	-0.0910431													0.117532	0.251974
				0.185668	-0.216529													0.398945	-0.015338
				0.203854	-0.227633													0.000818879	0.32657
				-0.149648	-0.00970546													0.416965	-0.0281945
				-0.132296	-0.198779													0.334427	0.51287
				0.0419239	-0.285125													0.208602	0.125608
				-0.123979	0.0221256													-0.105492	0.0849964
				0.230939	-0.179356													0.43911	0.337038
				0.307098	-0.0322275													0.145968	0.470457
				-0.102212	-0.57113													0.473495	0.560065
				0.0195799	-0.434668													0.163326	0.239628
				-0.0487653	-0.32543													0.631013	0.060251
				0.405289	-0.0459139													0.44237	0.141222
				0.277285	-0.528741													0.374093	0.132481
				0.11826	-0.0642713													-0.193502	0.439754
				-0.0129117	-0.117363													0.359587	-0.0157323
				-0.199045	-0.357461													0.333692	0.255854
				0.503109	-0.243861													0.594986	0.268361
				-0.049476	-0.487778													0.24945	0.0710174
				0.303254	-0.156776													0.299532	0.165696
				0.382974	-0.57357													0.173163	0.340885
				0.0537678	-0.323705													-0.00127899	0.624508
				0.225836	-0.114137													0.387611	0.123401
				0.30894	-0.466708													0.00845097	0.0983899
				0.161184	-0.271366													0.27999	0.671747
				0.310495	-0.0798844													-0.0218717	0.439347
				0.684904	-0.418357													0.405866	0.383662
				-0.00168143	-0.356825													0.30071	0.607018
				0.0114664	-0.162103													0.112742	0.218045
				0.188079	-0.207984													0.493362	-0.0316335
				0.0370267	-0.0489314													-0.00512389	0.161597
				0.376018	-0.149925													0.104727	0.245705
				0.141704	-0.107901													0.274033	0.177383
				0.159816	-0.282235													0.021439	0.277025
				0.163078	-0.326289													0.129889	0.381648
				0.410971	-0.0712961													0.13089	0.516403
				0.563164	-0.367759													0.152206	0.255402
				-0.065691	-0.189899													0.330856	0.202497
				-0.0537277	-0.566845													0.605792	0.45477
				0.265697	-0.603846													0.475075	-0.001703
				-0.0141628	-0.399234													0.190366	0.549026
				0.328377	-0.237883													0.286219	0.397581
				0.239951	-0.307182													0.245428	0.335044
				-0.0381824	-0.48832													0.186934	0.47125
				0.204048	0.0124297													0.270611	0.104317
				-0.374715	-0.475879													0.266505	0.139375
				0.320334	-0.226185													0.306388	0.19572
				0.327641	-0.299904													0.132994	0.474406
				-0.0557828	-0.159764													-0.491005	0.315666
				0.129069	-0.43251													0.160466	0.459372
				-0.051248	-0.410654													0.0580642	0.0728119
				0.311401	-0.344244													0.458978	0.0646459
				0.374777	-0.135468														0.274558
				0.230471	-0.125771														0.607498
				0.150162	-0.0978613														0.513919
				0.424777	-0.116643														0.477843
				0.0303609	-0.050381														0.571276
				0.0435518	-0.294164														0.407484
				0.118381	-0.131965														0.418489
				-0.190852	-0.0392198														0.331905
				0.518239	-0.277078														0.497327
				0.287747	-0.234588														0.264214
				0.604226	-0.298947														0.0223435
				0.297472	-0.207051														0.246124
				0.378249	-0.205067														0.546749
				0.22075	-0.155385														0.499908
				0.475595	-0.26091														0.565116
				0.325393	-0.267607														-0.066896
				0.258418	-0.259312														0.36403
				-0.0159989	-0.22573														0.198393
				0.298816	-0.565262														0.469372
				0.281746	-0.299854														0.233856
				0.00482474	-0.275214														0.466509
				0.223391	-0.296295														0.397847
				0.582351	-0.408972														0.608212
				0.0605208	-0.310982														0.242841
				0.294473	-0.220503														0.280196
				-0.0463463	-0.191763														0.381795
				0.389131	-0.490981														0.479472
				0.403683	-0.297317														0.552796
				0.210569	-0.105045														0.338198
				0.21655	-0.205574														0.522095
				0.324524	-0.307288														0.467603
				0.209572	-0.445393														0.298822
				0.551685	-0.229884														0.451693
				0.259859	-0.174062														0.573159
				0.0871994	-0.384367														0.488403
				0.363958	-0.137336														0.0332111
				0.153258	-0.132744														0.463396
				0.271087	-0.244863														0.487745
				0.418139	-0.434922														0.410711
				0.267425	-0.443849														0.316159
				0.156288	0.131126														0.384009
				0.293452	-0.322405														0.459869
				0.150341	-0.249823														0.465263
				0.230745	-0.305209														0.528752
				0.174719	-0.113672														0.348729
				0.216319	-0.436761														0.498979
				0.661548	-0.109345														0.0891792
				0.278647	-0.433412														-0.184061
				0.430162	-0.226946														0.655367
				0.368321	-0.543239														0.334557
				0.328284	-0.473321														0.507942
				-0.00551444	-0.264196														0.713933
				0.176563	-0.181335														0.452731
				-0.00181045	-0.311314														0.544086
				0.245219	-0.345053														0.531524
				0.668242	-0.387369														0.321605
				0.477353	-0.25389														0.857137
				0.0232579	-0.190611														0.447246
				0.00173192	-0.550649														0.212339
				0.64122	-0.591508														0.403746
				0.0291347	-0.472177														0.566134
				0.0152925	-0.20824														0.143152
				-0.0269781	-0.0336242														0.283033
				-0.0176936	-0.465571														0.252738
				0.144811	-0.109839														0.557177
				0.0213905	-0.231545														0.447739
				0.2306	-0.35442														0.414962
				0.100569	-0.209956														0.3134
				0.02918	-0.502021														0.284645
				0.0145695	-0.419721														0.227967
				0.084228	-0.353222														0.330187
				-0.133073	-0.389211														0.000188188
				0.263012	-0.442664														0.519647
				0.426783	-0.222239														0.654834
				0.249089	-0.470842														-0.0391918
				0.448399	0.163665														-0.0134165
				0.605114	-0.244138														0.564887
				0.619513	0.0856038														0.49099
				0.50912	-0.472011														0.273264
				0.342465	-0.526004														0.27829
				-0.813092	0.390875														0.173762
				0.453274	-0.0480141														0.0548088
				0.258463	-0.506346														0.473019
				0.327862	-0.357179														0.0967033
				0.375549	-0.308639														0.297022
				0.252571	-0.00342505														0.121442
				0.403306	-0.302467														0.403952
				-0.022569	-0.0517782														0.48914
				-0.0474515	-0.360872														0.287895
				0.261578	-0.395056														0.54281
				0.547922	-0.42185														0.313837
				0.102119	-0.181533														0.263593
				0.111173	-0.182951														0.0726053
				0.26921	-0.748949														0.0224463
				0.477176	-0.285743														0.235241
				0.870307	-0.052275														0.138962
				0.318546	-0.35009														0.131247
				0.267674	-0.0879335														0.423292
				0.648443	-0.365745														0.011713
				-0.00332373	-0.0844781														0.31354
				-0.0191267	-0.112019														0.433304
				0.326912	0.0786576														0.546417
				0.262149	-0.645351														0.219
				0.118812	-0.395171														0.217603
				0.449492	-0.0814635														0.117414
				0.165038	0.137123														0.165413
				0.110048	-0.140219														0.389511
				0.151463	-0.185388														0.38632
				0.271142	-0.232985														-0.043498
				0.20543	-0.239674														0.305544
				0.575594	-0.0644793														0.319321
				0.529772	-0.191997														0.123996
				-0.0482612	-0.0521347														0.39072
				0.155874	0.0256672														0.387577
				0.371453	-0.200762														0.655942
				0.11613	-0.322639														0.630908
				0.412936	-0.128329														0.367293
				0.330719	-0.298632														0.919012
				0.471034	-0.062172														0.178976
				0.162249	-0.138349														0.174487
				0.278531	0.153662														0.0234359
				0.350261	-0.134677														0.197345
				0.524155	-0.369749														0.566084
				0.0840846	-0.142605														0.489809
				-0.0529438	-0.174082														0.1944
				0.130569	-0.116159														0.124365
				0.503399	-0.474338														0.114521
				0.478086	-0.308209														0.100212
				0.656632	-0.252711														0.14947
				0.0270075	-0.161068														0.792417
				0.310783	-0.517909														0.646046
				0.22591	-0.275995														0.241375
				0.193167	-0.308726														0.452161
				-0.00825041	-0.223323														0.0142196
				0.14843	-0.159223														0.398422
				0.0520421	-0.348957														0.0246505
				0.362489	-0.260935														0.435916
				0.16565	0.00871785														0.0715718
				0.293041	-0.460312														0.180705
				0.0189532	-0.237112														-0.0344193
				-0.113819	-0.235777														0.581259
				0.474862	-0.0861803														0.617506
				0.115909	-0.551773														0.815074
				-0.0879811	-0.28701														-0.0132235
				0.29048	-0.224068														0.241744
				0.190371	-0.514945														0.0509531
				0.200552	-0.0691777														0.953864
				0.381055	-0.24783														0.161422
				0.483043	-0.523589														0.541104
				0.440913	-0.436311														0.709825
				0.170098	-0.317248														0.561939
				0.363328	-0.262252														0.478087
				0.0751681	-0.0890838														-0.033159
				0.12808	-0.407167														0.32089
				0.124245	-0.362653														0.370334
				-0.0652195	-0.453872														0.605315
				0.152495	-0.370015														0.310452
				0.484229	-0.495543														0.458831
				0.302536	-0.167572														0.0198176
				0.380293	-0.278777														0.122685
				0.0660259	-0.586533
				0.0384269	-0.195941
				0.192067	-0.765861
				0.426831	-0.0570949
				0.342533	-0.629908
				-0.00963598
				0.302251
				0.0448031
				0.376353
				0.422973
				0.270392
				0.0797896
				0.0885771
				0.490988
				0.183669
				0.216664
				0.278441
				0.540094
				0.244426
				0.606209
				0.024472
				0.566975
				0.544305
				0.311669
				-0.0355293
				0.266013
				-0.0907834
				0.431696
				0.0245712
				0.452044
				0.25641
				0.54761
				0.485861
				0.439794
				-0.291473
				0.491666
				0.530216
				0.221076
				0.10893
				0.513547
				-0.12007
				0.0872011
				0.100745
				0.0786881
				0.355805
				0.767851
				0.654508
				0.328057
				0.137088
				0.204638
				0.0334932
				0.315664
				0.333453
				0.902859
				0.157588
				0.401778
				-0.015689
				0.0591786
				0.268053
				-0.0485094
				0.0330641
				-0.05483
				0.56555
				0.106701
				0.527099
				0.246072
				-0.000693509
				0.238793
				-0.0392286
				0.0386927
				0.511699
				0.0109163
				0.262356
				0.855016
				0.157689
				0.357278
				0.162033
				0.374112
				0.125119
				0.841685
				0.443701
				0.0144091
				0.442404
				0.481868
				0.0949469
				0.365409
				0.0784329
				-0.0262461
				0.357016
				-0.149878
				0.0615059
				0.36661
				0.600118
				0.03068
				0.519561
				0.499741
				0.869068
				0.318156
				0.526431
				-0.000804613
				0.099504
				0.0242867
				-0.207063
				0.155962
				0.655227
				0.212439
				0.0653626
				0.287847
				0.440795
				0.510201
				0.442562
				0.370311
				0.184739
				0.0880201
				0.0633858
				0.0119162
				0.475624
				0.258525
				0.254155
				0.567855
				0.467613
				0.418686
				0.257443
				0.461169
				0.388352
				-0.0164246
				0.224193
				0.0309974
				-0.00633483
				-0.0207291
				0.500746
				-0.07414
				0.272598
				-0.0333917
				0.462855
				0.141999
				0.046974
				0.344187
				0.394191
				0.200087
				0.0105968
				-0.045489
				-0.034677
				0.0334058
				0.524427
				0.0788475
				0.526186
				0.0165589
				0.433711
				0.220603
				0.345287
				0.246724
				0.384776
				0.0920255
				0.0819359
				0.5342
				0.458214
				0.156552
				0.218999
				0.137719
				0.342462
				0.415261
				-0.0248167
				0.112871
				0.740397
				0.674129
				0.251011
				0.013979
				0.226239
				-0.316852
				0.0681222
				0.254642
				0.0660951
				0.337837
				0.580856
				0.238247
				0.55273
				0.449399
				0.299338
				0.459919
				0.543244
				0.478688
				0.69918
				-0.39072
				0.564999
				0.000866586
				0.0988373
				0.591135
				0.125281
				0.244606
				0.509037
				0.460869
				0.28341
				0.367821
				0.516431
				0.297914
				0.192324
				-0.0962535
				0.0322766
				0.139909
				0.0961802
				0.36593
				0.487874
				0.0246559
				0.0905422
				0.0127392
				0.0127174
				-0.106487
				0.02578
				0.22118
				0.43765
				0.197402
				0.280198
				0.00281088
				0.0564495
				0.0539577
				0.0652102
				-0.0167022
				0.11563
				0.412429
				0.364924
				-0.0255903
				0.199032
				0.312103
				0.0907463
				0.602787
				0.212647
				0.544526
				0.309583
				0.14816
[truncated: 39 more rows]

## Sheet: Figure 3D
Figure 3D: Quantification of cells showing A3 relocalization in 3 independent experiments
Top panel: EBV BORF2
	A3A			A3A L3 A3G			A3Bctd			A3Bctd L3 A3G			A3Gctd			A3Gctd L3 A3A/B
Total cell #	181	110	247	259	257	215	155	135	288	227	104	178	132	279	162	114	135	113
# cells with relocalization	163	92	194	217	207	176	136	114	224	171	82	126	8	52	20	4	19	17
% cells with relocalization	89.8	83.78	78.69	83.78	80.56	81.98	87.78	84.31	77.93	75.44	78.69	70.51	6.2	18.75	12.61	3.68	13.91	15.13
% cells with relocalization (mean)	84.09			82.1067			83.34			74.88			12.52			10.9067
% cells with relocalization (SD)	5.56148			1.61373			4.99613			4.11865			6.27548			6.28813
Bottom panel: KSHV ORF61
	A3A			A3A L3 A3G			A3Bctd			A3Bctd L3 A3G			A3Gctd			A3Gctd L3 A3A/B
Total cell #	141	144	267	176	217	242	285	256	120	156	262	146	141	206	113	331	236	365
# cells with relocalization	126	125	189	23	68	60	261	227	93	20	48	16	29	40	16	115	75	90
% cells with relocalization	89.57	87.08	70.74	12.79	31.13	24.86	91.54	88.79	77.72	12.7	18.31	10.78	20.35	19.38	14.06	34.62	31.82	24.6
% cells with relocalization (mean)	82.4633			22.9267			86.0167			13.93			17.93			30.3467
% cells with relocalization (SD)	10.2288			9.3216			7.31551			3.91279			3.38643			5.16993

## Sheet: Figure 3E
Figure 3E: Pearson Correlation Coefficient (PCC) values for GFP channel (indicated A3) and DAPI
Left panel: EBV BORF2 (PCC values)							Left panel: EBV BORF2 (PCC median)							Right panel: KSHV ORF61 (PCC values)							Right panel: KSHV ORF61 (PCC median)
A3A	A3A L3 A3G	A3Bctd	A3Bctd L3 A3G	A3Gctd	A3Gctd L3 A3A/B		A3A	A3A L3 A3G	A3Bctd	A3Bctd L3 A3G	A3Gctd	A3Gctd L3 A3A/B		A3A	A3A L3 A3G	A3Bctd	A3Bctd L3 A3G	A3Gctd	A3Gctd L3 A3A/B		A3A	A3A L3 A3G	A3Bctd	A3Bctd L3 A3G	A3Gctd	A3Gctd L3 A3A/B
-0.00720299	-0.161403	0.0722025	-0.138655	-0.0305991	0.0621948		-0.201319	-0.24325	-0.110134	-0.246672	0.230405	0.229946		-0.231405	0.00474558	-0.241776	0.539221	0.128425	0.59951		-0.148156	0.363601	0.0724321	0.46926	0.280539	0.188996
-0.535151	-0.104	-0.0801416	-0.241621	0.0821649	0.0121391									-0.210996	0.527487	-0.0343631	0.28528	0.0827807	0.0517065
-0.346673	-0.479537	-0.294037	0.0140047	0.60692	0.176136									-0.0578993	0.30319	-0.208962	0.41902	0.376359	0.510236
-0.239156	0.0771568	-0.0623099	-0.320699	0.279716	0.428359									-0.0791348	0.112232	0.0466732	0.13806	0.618984	0.456809
-0.532289	-0.592036	0.0097472	-0.29641	0.39499	-0.445877									-0.427297	0.065107	-0.247098	0.266387	0.261112	0.105596
-0.21046	0.0401919	-0.161372	-0.446042	0.00606595	-0.0283956									-0.295331	0.61678	-0.212106	0.6436	0.855022	0.468101
-0.190279	-0.263106	-0.116282	-0.0433709	0.218524	0.542321									-0.331135	0.447089	-0.29456	0.260317	0.618355	-0.222039
-0.0038584	-0.0251783	-0.0503143	-0.125703	-0.0169082	0.0634161									-0.254977	0.382349	-0.129823	0.361107	0.540512	0.444308
-0.462463	0.0198744	-0.0808004	-0.181004	0.145665	-0.0140039									0.545632	0.154315	-0.140907	0.410254	0.175322	0.310134
0.137009	-0.580393	0.104401	-0.401683	-0.0302307	0.363595									0.179018	0.66586	-0.165255	0.647448	0.323882	0.033331
-0.401055	0.158879	-0.488007	-0.358934	-0.0257069	0.34855									-0.344457	0.361846	-0.0618684	0.614385	0.223109	-0.318663
0.126379	-0.404594	-0.250201	-0.0608968	0.0839999	-0.0735683									-0.479392	0.629829	-0.168773	0.220918	0.507869	0.150955
-0.318684	-0.437692	0.255059	-0.647516	0.184534	0.172806									-0.280806	0.629041	-0.288647	0.697056	-0.0526565	0.0514664
0.388029	-0.358701	0.215131	-0.206569	0.0397865	0.354764									-0.385402	0.65367	0.0269135	0.220266	0.521732	0.168839
-0.201919	0.208219	-0.015613	-0.306133	0.0416418	0.537425									-0.0333555	0.157148	0.33209	0.495894	0.329553	0.552527
-0.360188	-0.610503	-0.24518	-0.650354	0.658435	0.482258									-0.226381	0.201981	0.342032	0.612343	0.114263	0.592126
-0.045053	-0.236349	-0.0769667	0.163979	0.376563	0.236214									-0.219897	0.416295	0.307534	0.643087	0.172552	0.308591
-0.251874	-0.211456	0.102414	-0.278649	0.202442	0.126667									-0.16384	0.00039009	0.103241	0.391972	0.611046	0.493943
-0.19576	-0.308223	0.00390604	-0.100715	0.0807578	0.0365503									-0.238059	0.685714	0.128065	0.577143	0.36577	0.538242
-0.0208536	-0.183447	-0.040375	-0.32863	0.15705	-0.0421331									-0.228068	-0.0562415	-0.0112405	0.480393	0.251181	0.243589
-0.230448	-0.337412	-0.304236	-0.40858	0.190442	0.516979									-0.285255	0.648471	0.0855694	0.691756	0.509551	-0.266355
-0.241301	-0.230131	-0.0753049	-0.214342	0.17826	0.213279									0.353931	0.647277	-0.142841	0.572252	0.106645	0.135192
-0.435462	0.299013	0.0626629	0.215722	-0.00451149	0.287279									-0.363765	0.562188	-0.00364861	0.610366	0.655744	0.169167
0.0643211	-0.844729	-0.314523	-0.11194	0.345141	0.36522									-0.375777	0.434348	0.0515276	0.469526	0.127447	-0.173108
-0.247521	-0.279638	-0.198854	-0.291739	0.191861	0.368395									-0.212577	0.681869	-0.442729	0.65627	-0.0206387	0.133385
-0.115252	-0.159266	0.156104	0.319229	0.553329	-0.533256									-0.0875262	0.2998	-0.254264	0.604459	-0.279461	0.271313
-0.404653	0.0637675	-0.261839	-0.277031	0.143518	0.432665									-0.224951	0.390277	-0.130644	0.717141	0.45717	0.602695
-0.000651776	-0.00390396	-0.254926	-0.570368	0.0923907	0.296455									-0.19234	0.277009	-0.143442	0.602216	0.624786	0.094042
0.00110252	-0.665732	0.308799	-0.230328	-0.0118214	0.0283298									-0.21619	0.0239274	0.0454602	0.43692	0.215651	0.129005
-0.337854	-0.0326137	-0.457659	-0.0312463	0.00269075	0.259099									-0.141884	0.413079	0.00144656	0.732284	0.517588	0.226034
-0.288348	-0.317552	-0.0830034	-0.352608	0.196021	0.000300176									-0.277085	0.384677	0.107484	0.0256396	0.0953946	0.244738
-0.381794	-0.529714	0.220195	-0.252878	0.100911	0.270116									-0.379273	0.437153	-0.11246	0.472552	-0.0610874	0.210622
-0.348635	-0.128411	-0.0355507	-0.361457	0.476106	0.211961									-0.0679545	0.173786	0.293547	0.527578	0.688029	0.111461
-0.239801	-0.170812	-0.0753525	-0.42713	0.122903	0.118965									-0.418035	0.363554	-0.0916219	0.602529	0.0291605	0.432067
-0.338077	-0.327819	-0.113891	-0.123054	0.434462	0.0176									-0.343224	0.338701	-0.261074	0.838327	0.492847	-0.221569
0.767148	-0.280764	-0.132535	-0.584118	0.276053	-0.206509									-0.465143	0.517711	0.0259759	0.419062	0.435983	-0.225758
-0.448716	-0.125877	-0.441564	-0.29657	-0.0650535	0.200804									0.553593	0.275675	0.1225	-0.0346746	0.405594	0.439746
-0.296525	-0.378706	0.448187	0.0131734	-0.0316381	-0.0351942									-0.430312	0.253973	0.597929	0.414635	0.544249	0.147718
-0.571086	-0.427457	0.00503401	-0.514051	0.235953	-0.396794									-0.333196	0.380228	-0.380661	0.024486	0.458857	-0.0277389
-0.123495	-0.3306	0.248686	-0.246168	0.598827	0.272471									0.0140449	0.424063	0.0206764	0.202166	0.352157	-0.0256509
0.185055	-0.100062	-0.345481	-0.635389	0.435631	0.163993									-0.465209	0.473798	0.327412	0.636708	0.463319	-0.273181
-0.226526	-0.107476	-0.382328	-0.598402	0.237846	0.0800323									-0.286677	0.442243	-0.0194191	0.691369	0.527348	-0.0678938
-0.545375	-0.0415227	-0.061304	-0.639637	0.225954	0.159791									-0.595191	0.396066	0.0219388	0.552845	0.859021	-0.0759203
-0.252844	-0.0748417	-0.161883	-0.304254	0.48984	0.0802465									-0.321182	0.399893	-0.0672604	0.0513602	0.577873	0.406732
-0.331543	-0.44869	0.236039	-0.541243	0.341191	0.259795									-0.0302421	0.842054	0.131523	0.203867	0.536732	0.355473
-0.0268422	-0.0198543	-0.0661522	-0.310533	-0.0575741	0.353489									-0.0234364	0.479055	-0.143068	0.602825	0.504034	-0.00818679
-0.361723	-0.0555951	-0.16263	-0.0646813	0.473927	0.143901									0.00201088	0.169592	0.245389	0.721957	-0.0103249	0.346467
-0.619921	-0.470859	-0.608773	-0.243555	0.463073	0.0937887									-0.291525	0.360067	0.164252	0.575442	-0.0285132	0.263308
0.0104991	0.0118832	-0.340462	-0.473102	0.590238	0.497752									-0.43335	0.293406	0.527853	0.417379	-0.0277317	0.172858
-0.267686	0.0969715	-0.219332	-0.379449	-0.222504	-0.0662202									0.118871	0.336754	-0.3815	0.562623	0.462243	0.497978
-0.659896	0.383081	0.0140243	-0.736674	-0.313283	0.133172									-0.491202	0.00425446	-0.265937	0.445961	0.268241	0.484192
-0.429095	-0.256262	0.526509	-0.359729	0.168445	-0.090951									-0.0665709	0.0343738	0.909284	0.8499	0.418526	0.32725
0.00741106	-0.391595	-0.33982	-0.45833	0.466697	0.120805									-0.309928	0.0985674	0.015265	0.0306936	0.145594	0.160914
-0.185768	0.655934	0.275006	-0.672253	0.153983	-0.265906									0.466504	-0.334102	0.222413	0.223107	-0.00674414	0.184728
-0.269153	-0.0724075	-0.319799	-0.00757007	0.478378	0.50628									0.552996	0.192671	0.632127	0.615837	0.60101	0.206998
-0.0866198	-0.590737	-0.0210264	-0.420788	0.0119519	-0.0952158									0.401223	0.21503	0.221172	0.509278	-0.0255963	0.208011
-0.33693	-0.110464	0.0629357	-0.30749	0.535852	0.506963									-0.28758	0.00738805	0.369276	0.604157	0.0720389	0.375754
-0.127499	0.00161703	-0.143921	-0.212402	0.355325	0.466683									-0.208625	0.409525	0.650632	0.169881	0.704886	0.0388113
-0.42481	-0.458086	-0.349188	-0.512605	-0.342336	0.182242									-0.437523	0.260304	-0.13152	0.203316	0.549239	0.297211
-0.377037	-0.0543829	0.163826	-0.189704	0.220643	0.445996									-0.348018	0.759404	0.222216	0.286975	-0.0910625	0.22347
-0.462865	-0.0625032	-0.456218	-0.760137	0.174411	0.202087									-0.022189	0.201551	-0.0177132	0.514397	0.607241	0.287865
-0.0111142	0.46479	0.157384	-0.27147	-0.215804	0.414689									-0.21583	0.42543	0.182033	0.0825152	0.419662	0.464954
-0.0159554	-0.418077	0.198328	-0.264326	0.41847	0.402225									-0.172361	0.671398	0.412111	0.258842	0.275277	-0.0573716
-0.410377	-0.17093	0.595067	-0.150581	0.147908	0.373862									-0.206915	0.308809	0.162377	0.37211	0.334408	0.336448
-0.463793	-0.471741	-0.334742	0.0463607	0.241321	0.320237									-0.224529	0.726877	-0.0768702	0.628668	0.158245	0.546934
-0.282301	-0.0916496	-0.00942714	-0.437677	-0.0779313	0.112501									-0.255666	0.079604	0.291628	0.665873	0.341276	0.202137
-0.719591	-0.205202	0.285414	-0.456984	0.0766548	0.134033									-0.369207	0.632494	0.545376	0.219321	0.00707909	-0.353798
-0.40285	-0.429671	-0.527225	-0.318175	0.535692	0.26524									0.0722831	0.124764	0.0245882	-0.0418711	0.39105	0.276185
0.063824	-0.0662293	0.450244	-0.458955	0.0145484	0.31505									-0.0317183	0.222701	0.069663	0.462896	0.343641	0.00630041
-0.140981	-0.297934	-0.149241	-0.0690288	0.134572	0.151556									0.366618	0.0346731	-0.226291	0.777447	0.733965	-0.200345
-0.281241	-0.0627193	-0.410944	-0.491408	0.220804	0.190992									-0.474566	0.12957	0.0596184	0.467974	0.293811	-0.0315687
-0.202775	-0.189117	0.184728	0.0587705	0.266063	0.286323									0.278679	0.596199	0.0757345	0.572047	0.585231	0.248018
0.170557	0.0942154	-0.208446	-0.160889	0.0270059	0.208056									-0.284204	0.530666	0.275927	0.0689184	0.440667	-0.365549
0.325268	-0.294141	0.653727	-0.136481	0.166675	0.33735									-0.441732	0.157415	0.244082	0.268068	0.380431	0.0257792
0.0407714	-0.414064	-0.0543582	-0.0111549	0.310212	0.447912									-0.424274	-0.050537	0.379563	0.350443	0.0855596	-0.0396348
-0.479133	-0.497711	0.164492	0.177269	0.444018	0.368162									0.158437	0.00156305	0.476419	0.704119	0.583797	0.336317
0.06196	-0.390872	0.614139	-0.146176	0.456878	0.420862									-0.162251	0.458776	0.361401	0.656606	0.467593	-0.0177701
-0.375057	-0.259272	-0.184084	0.0022265	0.388724	0.0526434									-0.265909	0.434312	-0.0266837	0.0614791	0.541872	0.384233
-0.0787133	0.504382	0.280884	-0.356968	0.424902	0.18199									-0.396975	-0.0312463	-0.199646	0.559972	0.394047	0.555105
0.0280837	0.0883802	0.396482	-0.317806	-0.0569551	-0.0375724									-0.12246	0.36079	0.120506	0.318999	0.275828	0.329376
-0.128609	-0.256067	0.555161	0.30516	0.525919	-0.0121185									-0.419968	0.570189	-0.0820699	0.437576	0.514194	-0.29047
-0.43836	-0.590458	-0.547364	-0.726097	0.46934	0.0498159									0.0862426	0.685136	-0.105416	0.57723	0.519801	0.345245
-0.15105	-0.546833	0.364869	-0.356781	0.208492	0.609252									0.274755	0.311926	0.0769321	0.412184	0.278086	0.243473
-0.154085	-0.0195514	-0.193637	0.514613	0.43688	-0.366972									0.220626	0.469815	0.0519634	0.536985	0.458107	0.15574
0.656291	-0.510678	-0.0127728	-0.277328	0.399324	0.135339									-0.202854	0.544533	0.0722606	0.735341	0.682976	0.421188
-0.0159921	-0.403885	-0.532799	-0.215728	0.459285	0.311866									-0.200001	0.204627	0.189221	0.483966	0.458156	0.484638
0.0811788	-0.0419136	-0.450926	0.538458	0.0847402	0.166839									-0.50265	0.356421	-0.146114	0.735977	0.22812	0.249878
-0.412636	-0.191657	0.342387	-0.282978	0.076444	0.277439									0.0423852	0.200629	0.0598237	0.290233	-0.0181817	0.243538
-0.0870219	0.0141714	-0.38023	-0.318691	0.527084	-0.0202535									-0.311551	0.345639	-0.126164	0.731401	0.509158	0.347031
-0.0989371	-0.331213	-0.0168751	-0.166257	0.442848	0.398917									0.0311851	0.565369	-0.186256	0.637454	0.0956762	0.0505156
-0.265646	-0.237743	-0.735361	-0.404623	0.0819633	0.297411									-0.230652	0.531941	0.338903	0.57269	0.371757	-0.152788
-0.491325	-0.332929	0.460156	-0.235588	0.26242	0.122102									-0.0486273	0.610297	0.0641943	0.632218	0.599555	0.0910522
-0.143201	0.34486	0.561503	0.360278	0.0511011	0.386194									0.396413	0.637126	0.0341893	-0.017902	0.198494	0.336961
0.00875928	-0.269146	-0.405568	-0.614369	0.299383	0.486978									-0.239821	0.584407	-0.447059	-0.0286504	-0.00200263	0.562551
-0.402439	-0.316625	-0.453222	-0.187377	0.0816229	0.0146752									-0.30717	0.64548	0.258994	0.764514	0.26499	0.139466
-0.454615	-0.216874	0.438769	0.177139	0.407974	0.0382589									-0.177363	0.359717	-0.0910373	0.599849	0.0318019	0.527924
-0.295533	-0.139344	0.389319	0.129675	0.0881384	0.444284									0.19369	0.574938	-0.133932	0.220552	0.281	0.115372
0.0478827	0.424615	-0.416344	-0.321507	0.383486	0.567402									-0.108828	0.347506	0.328841	0.566315	0.0914857	-0.0251393
-0.276501	-0.638798	0.173778	-0.292196	0.22501	-0.0544728									0.17598	0.385541	0.43722	0.350434	0.324052	0.614274
-0.19094	-0.114855	-0.0572039	-0.599604	0.234288	0.130007									0.270734	0.622868	-0.172526	0.756587	0.598949	0.236765
-0.343585	-0.319757	0.777785	-0.372878	0.0825169	0.415781									-0.407999	0.499078	-0.197205	0.317315	0.701445	0.0314404
-0.173781	-0.27036	0.414672	-0.382597	0.0434945	-0.0228158									0.053199	0.499835	-0.0147042	0.421934	0.559342	0.0585889
-0.175476	-0.144497	-0.311974	0.0473179	0.37799	-0.18316									-0.0184734	0.661369	-0.105926	0.630651	0.0651013	0.498993
0.0443145	-0.00343913	0.525307	-0.4443	0.120787	0.241395									0.0449519	0.578845	-0.236017	0.560665	0.401694	0.574048
-0.0678784	-0.14746	-0.426368	-0.345168	0.252777	0.381509									-0.292931	0.49081	0.0101437	0.338033	0.426086	0.231451
-0.0374122	-0.728504	0.234853	-0.358119	0.226093	0.0220163									-0.114881	0.591145	0.241628	0.78103	0.204503	0.163916
0.27304	-0.0281835	-0.0750234	0.234548	0.50197	0.400059									0.337966	0.594075	0.0963422	0.58239	0.222226	0.34171
-0.141284	-0.0654397	-0.355436	0.660644	-0.303194	0.349438									-0.102388	0.392067	-0.215106	0.571639	0.35052	0.704372
0.0727206	-0.260547	-0.0998373	-0.418211	0.309252	0.306783									0.219249	0.587258	0.266908	0.538932	0.435124	0.101295
-0.319544	0.159877	0.451785	-0.502894	0.291484	0.454044									-0.508285	-0.0775852	-0.229271	0.50296	0.328949	0.301734
-0.28531	0.19492	-0.451965	-0.0635163	0.0886598	-0.134465									-0.447933	0.357748	0.032943	0.546863	0.363946	-0.0272884
-0.305967	-0.0698034	-0.204167	-0.421203	0.502318	0.307988									0.0290449	-0.678595	0.311981	0.248132	0.599968	0.644057
-0.0824393	-0.723792	-0.412599	0.35301	0.49419	0.0696917									-0.361503	0.677663	-0.0444207	0.465913	0.672445	0.340541
-0.337932	-0.0908836	-0.409688	-0.516426	0.518	0.390914									-0.407887	0.00406346	-0.18037	0.648545	0.114823	0.389767
-0.415579	-0.374078	-0.195922	-0.365086	0.446983	0.0947576									-0.256675	-0.0425111	0.263836	0.455918	0.363869	0.299662
-0.162376	-0.0828656	-0.891205	-0.42723	0.373491	0.462768									0.102247	0.679555	0.229465	0.532861	0.417406	0.491535
-0.176999	-0.32819	-0.0955903	-0.367884	0.437217	0.39768									0.0121562	0.43284	-0.253075	0.505514	0.158115	0.345595
0.30406	-0.272686	0.0761818	-0.192571	0.0882276	0.321239									0.502477	-0.100829	-0.291623	0.570292	-0.120407	0.392626
-0.0662793	0.127213	0.0516505	0.271696	0.457981	0.33591									-0.277996	-0.0176848	-0.32838	0.723207	0.247541	0.385569
-0.293728	-0.293625	-0.0340068	-0.251494	0.343259	0.381572									0.265242	0.540178	0.00656082	0.342784	0.165377	0.239736
-0.234834	-0.491437	-0.0403248	0.412424	0.0140595	-0.0108828									-0.172721	0.354212	0.245957	0.496018	0.37235	0.439677
-0.280615	-0.63907	-0.368821	-0.315493	0.55175	0.0355327									-0.362844	0.182405	-0.362216	0.427229	0.317393	0.423714
-0.40861	-0.509379	-0.0710353	-0.0808407	0.5464	0.025464									-0.120083	0.188873	0.00458799	0.395004	0.0317127	0.397403
0.0948226	-0.633739	0.232026	-0.503925	0.0642769	0.106652									-0.384638	0.0100698	0.318101	0.0333552	0.472642	0.266458
0.411657	-0.191334	-0.471945	0.0575153	0.534438	0.297492									-0.011793	0.562149	0.0840679	0.661832	0.390844	-0.133866
-0.182774	0.0361836	-0.423433	-0.469873	0.00442315	0.405222									0.201686	0.521306	0.022429	0.411096	0.345934	-0.322258
-0.251845	-0.331032	-0.167751	0.0891537	0.0580999	0.587823									-0.00848169	0.359517	0.18308	0.614108	0.635562	0.116481
0.427096	0.469284	-0.325688	-0.56833	0.630726	-0.0879054									-0.0135534	0.497341	0.230816	0.574878	0.1925	-0.774788
-0.314753	-0.388048	-0.125946	-0.0540968	0.0686667	0.00516029									0.400794	0.0797654	0.149367	0.638384	0.472679	0.35754
-0.296146	-0.354428	-0.421816	-0.406226	-0.0165082	0.104928									0.528738	0.220269	-0.0338876	0.536576	0.569138	0.166342
-0.612183	-0.464829	-0.192477	0.205706	0.0735269	-0.0778925									-0.421339	0.615201	0.262042	0.731198	-0.0285976	0.325655
-0.150916	-0.241021	-0.35163	-0.114203	0.171459	0.447476									0.442191	0.662001	0.181331	0.418216	0.546965	-0.524466
-0.741239	-0.264324	0.207418	-0.472772	0.349761	-0.05925									-0.112389	0.26444	0.261139	0.755657	0.371763	-0.0122834
-0.244238	-0.178163	-0.0775468	-0.00896575	-0.0218947	0.440825									-0.12651	0.442243	-0.299466	0.587488	0.362075	0.103538
-0.152277	-0.473943	-0.241599	0.0816001	-0.02477	0.157568									-0.133771	0.44398	0.158495	0.551537	0.00929326	0.569614
-0.266925	-0.241655	-0.405174	-0.392112	0.0274164	-0.0415811									-0.103811	0.318665	-0.428637	0.38396	0.694856	0.226162
-0.0735423	-0.282676	0.0626128	-0.173207	0.354516	0.0640613									0.076289	0.256606	-0.0272547	0.260222	-0.0887583	0.158153
-0.303256	-0.125031	-0.268508	-0.0661616	-0.286698	0.371528									-0.116592	0.564624	-0.133589	0.503206	0.288061	0.00736807
-0.549922	-0.349744	-0.201383	-0.127355	0.028559	0.0453989									-0.073563	0.490947	0.0901716	0.678196	0.359683	0.43051
0.175451	0.0481551	-0.25215	-0.251191	0.410702	0.051675									-0.0839323	0.532093	-0.258307	0.490759	0.291126	0.246527
-0.297193	0.0272662	0.0655367	-0.19373	0.143085	0.00486281									-0.077209	0.239153	-0.256957	0.527326	0.362642	0.449523
0.0960215	-0.651002	-0.313401	-0.248801	0.0587546	0.362789									-0.193843	0.649092	-0.0610424	0.623398	-0.20745	0.486515
-0.375165	-0.659484	0.352067	-0.424807	0.261991	0.65373									-0.148974	0.557145	-0.179469	0.674925	0.472335	0.503839
0.0116637	-0.469504	-0.322106	-0.218636	0.190956	0.101382									0.0958581	0.533526	0.690968	0.343688	0.213408	0.188898
-0.0508285	-0.523703	0.117867	-0.267961	0.556235	0.193267									-0.525445	0.486671	0.117014	0.315943	0.443347	0.571949
-0.259169	-0.17667	-0.616351	-0.294979	0.350818	0.478149									-0.0038389	0.527097	-0.0112479	0.6852	0.334839	-0.322595
-0.349916	-0.00771834	-0.256734	-0.681467	0.428226	-0.0262036									-0.329145	0.0978009	0.582124	0.17094	0.313249	0.336943
-0.429568	-0.243701	-0.092942	0.0709295	0.258366	0.291468									-0.275547	0.388676	-0.0339719	0.436451	0.394997	-0.0690338
-0.195685	-0.545568	-0.291644	-0.447092	0.371711	0.199612									0.00805219	0.433427	0.198264	0.772743	-0.0799103	-0.0158404
0.0793577	-0.0656246	-0.46454	-0.353528	0.119436	0.487477									0.0706921	0.355499	-0.00496387	0.14551	0.14135	0.189558
0.00150974	-0.277693	-0.106273	-0.269127	0.023475	0.549306									-0.0972479	0.312496	0.698318	0.157814	0.463012	0.26941
-0.0319742	-0.00515437	-0.331753	-0.381939	0.187899	0.581363									0.525979	0.576048	-0.0669015	0.490051	0.479293	0.191902
-0.557834	-0.288801	0.265904	-0.441068	0.267872	-0.0472322									-0.421046	0.672522	-0.0735585	0.618059	0.538607	0.359919
0.363318	-0.317902	-0.317591	-0.406942	0.15802	0.244447									0.316796	0.49721	-0.0822811	0.471987	0.382446	0.385527
0.341332	0.203537	-0.470026	-0.107555	0.150404	-0.0314683									-0.00375926	0.603639	0.355686	0.474814	0.272055	0.16361
-0.610849	0.266267	0.0816933	-0.359906	0.595717	0.479352									0.327774	0.279144	0.216487	0.187736	0.402024	0.442212
-0.00129063	-0.672304	-0.286176	-0.128219	0.41812	0.348807									-0.182297	0.481241	-0.187272	0.468338	0.300638	0.363022
-0.0895002	-0.363154	0.155908	-0.353392	0.172446	0.598549									0.298336	0.390236	-0.0542911	0.446435	0.0925342	0.272613
-0.053065	-0.529582	-0.579115	-0.298182	0.290845	0.0751905									0.324133	0.464332	0.0621585	0.537287	0.291914	0.14179
-0.243345	-0.435766	-0.0782127	-0.451167	-0.043404	0.634353									-0.581737	0.467866	-0.366689	0.604665	0.605727	0.145562
-0.415041	-0.448132	0.0783365	-0.200776	0.0543047	0.457546									-0.175029	0.6216	-0.0750141	0.574861	0.430255	0.233485
0.496664	-0.448375	0.0339247	0.266131	0.532368	-0.0818976									-0.127057	0.431241	-0.0798183	0.415135	0.297402	0.17861
0.126355	-0.161484	-0.104088	-0.473222	0.532843	0.286723									-0.396484	0.438136	-0.318959	0.402998	0.414302	0.747097
-0.240765	0.142781	0.377867	0.0590779	0.450826	0.603145									0.00480984	0.488536	-0.151432	0.519308	0.568023	-0.00418157
0.163716	0.0964377	0.273256	-0.23847	0.489137	0.402904									-0.190998	0.425474	0.130277	0.511079	0.353334	-0.470068
-0.515464	-0.564685	0.563266	-0.446241	0.252567	0.346339									-0.0906263	0.2757	0.121747	0.316845	0.127654	-0.749164
-0.364039	-0.281773	-0.173165	-0.692992	-0.0484805	0.354869									0.361187	0.0397997	0.233629	0.506857	0.619202	-0.629627
-0.248852	0.259244	0.23908	-0.606899	0.421401	-0.0777661									-0.00667027	0.479334	0.330291	0.402269	0.119269	0.035546
-0.345025	-0.209946	-0.0707499	-0.196279	0.142096	0.477861									-0.0674761	-0.118175	-0.0286062	0.615591	-0.185664	0.0375761
0.074378	-0.124701	-0.316423	-0.115623	0.0691816	-0.268907									-0.0877675	-0.115375	0.129438	0.448281	0.199886	0.0996796
-0.572387	-0.30096	-0.364071	-0.23866	0.156112	-0.0546892									0.673244	0.318387	0.183143	0.34015	0.236707	-0.040154
-0.297433	-0.723299	-0.0197471	-0.648001	0.0190445	0.252784									-0.188969	0.564159	-0.514931	0.0606813	0.674542	-0.251216
-0.370379	0.00765104	0.438676	-0.447808	0.0731651	0.159883									-0.0460614	-0.0439061	-0.160157	0.474486	0.369371	-0.114346
0.256481	-0.222947	-0.125962	-0.116083	0.0302973	0.680851									-0.0734496	-0.00478335	0.462453	0.607831	0.25436	-0.266535
0.371962	-0.394563	0.495217	-0.1134	0.296492	-0.0810091									-0.225807	0.190185	0.256062	0.513152	0.29694	0.451494
-0.1376	-0.405096	-0.173133	-0.369755	0.0935273	0.0639399									-0.339284	0.496551	0.429544	0.503491	0.19807	0.350362
-0.332206	-0.206761	0.144012	-0.244371	-0.228105	-0.182575									0.511662	0.347359	0.130312	0.60427	0.605122	0.112846
-0.131678	0.201055	0.0202289	-0.24228	0.637755	0.222389									-0.352159	0.575125	-0.0640163	0.0689458	0.288294	-0.263219
-0.497481	-0.0854253	-0.075148	-0.488775	0.36076	0.215013									-0.227938	0.671713	-0.513616	0.0562823	0.0792898	0.344352
0.122643	-0.37674	-0.0596523	-0.344045	-0.244934	-0.0859597									-0.121637	0.447691	-0.17338	0.444645	0.0917596	-0.202365
-0.134542	-0.458249	0.231106	-0.339203	0.305733	0.677267									-0.342273	0.0946832	0.00721122	0.595769	0.535502	0.388359
-0.0804259	0.194857	-0.313498	-0.44841	0.269679	0.329277									-0.329906	0.349149	0.314752	0.201787	0.771721	0.560669
-0.0652103	-0.103026	0.669851	0.390481	0.258944	0.194745									-0.146494	0.280753	0.438822	0.168024	0.341031	0.265292
-0.204514	-0.350728	0.387733	-0.393433	0.482607	0.128232									-0.129019	0.257048	-0.119021	0.253263	-0.122082	0.448109
-0.229899	-0.152164	-0.108103	-0.40791	0.115976	0.372708									0.445929	0.0800398	0.457735	0.421619	0.394164	0.274681
0.17157	0.074821	-0.254097	-0.266001	0.514003	0.65606									-0.377457	0.197734	-0.330867	0.498101	0.338274	0.354838
0.499614	-0.368339	0.010038	-0.541219	0.386933	0.493613									-0.15903	0.0346182	-0.354234	0.313171	0.242489	0.446196
-0.519944	-0.038581	0.3321	0.0594687	0.360896	0.28844									-0.322301	0.31088	0.119474	0.443747	0.348128	0.312011
-0.534789	-0.157854	0.04806	-0.0341977	0.649362	0.480438									-0.119528	-0.0459639	-0.360634	0.165451	0.243417	0.138688
0.12633	0.76927	0.18253	-0.248298	0.280666	0.667845									-0.224611	0.462553	-0.263122	0.2251	0.349562	-0.0258247
-0.412977	0.0325681	0.22308	-0.266267	-0.0385136	0.428102									-0.066943	0.374247	0.253297	0.27208	0.350032	-0.00597347
-0.651431	0.0279332	-0.386019	-0.151543	0.280477	0.390189									0.292382	0.177337	0.113274	0.660224	0.131441	0.466103
-0.0311706	-0.376181	-0.227224	-0.427202	0.160444	0.334158									-0.113472	0.444815	0.696542	0.192423	0.309656	0.340466
-0.0451234	-0.389445	-0.300182	-0.344956	-0.0459912	0.278363									-0.289571	0.564658	-0.373204	0.692088	0.311158	0.46095
0.393823	0.200606	-0.0530543	-0.546603	-0.0197402	0.242489									-0.390401	0.591266	0.0776304	0.6467	-0.0658134	0.24108
0.137181	-0.12436	0.036115	-0.700611	-0.0916366	0.219729									0.369633	-0.0624094	0.0244461	0.377422	0.398787	-0.313655
-0.546792	-0.335267	-0.363721	0.0447217	-0.0870492	-0.225548									0.00434171	0.477542	-0.110845	0.199707	0.648517	0.364604
-0.213602	-0.350761	-0.0451392	0.0280113	0.442616	0.216864									-0.070177	0.387081	0.157269	0.619509	0.531459	0.0925015
-0.189205	-0.159106	-0.219483	-0.395453	0.331317	-0.0315536									-0.00489273	0.541983	-0.360944	0.707122	0.603736	0.526445
-0.147787	-0.3881	-0.429126	-0.0805825	-0.0184669	0.61464									-0.23091	0.407081	0.415515	0.0612599	0.229661	0.512332
0.115854	0.0545131	-0.145907	-0.299605	0.15625	0.261932									-0.0784052	0.0131555	0.0589714	0.648597	0.166935	0.315725
-0.08602	-0.347168	0.668112	-0.324176	0.299173	0.162295									-0.277061	0.0791549	0.306558	0.235431	0.268704	0.0238146
-0.540575	-0.194671	0.168238	-0.410958	0.0698276	0.124832									-0.201669	-0.307768	-0.276339	0.186915	0.347256	0.179851
-0.427973	-0.0803553	0.0552011	-0.118068	-0.0233104	0.685954									-0.385172	0.594218	0.39337	0.522228	0.545062	0.376791
-0.222409	-0.31071	-0.15174	-0.252382	0.0110044	0.454605									-0.189698	0.0277145	0.34324	0.255418	0.219301	0.0318147
-0.122639	-0.521981	0.369785	-0.250792	0.0107123	0.323208									-0.18738	0.246646	0.576293	0.310501	0.396373	0.26991
0.28709	-0.282426	0.0548344	-0.487482	-0.0789054	0.379802									-0.200479	0.538661	0.629831	0.31549	0.181303	0.312203
-0.309182	-0.369288	0.0219413	-0.254952	0.0974382	-0.0121544									-0.261948	-0.101859	0.270184	0.382162	0.328829	0.245734
-0.181615	-0.0651023	-0.268197	-0.181644	0.538418	0.591628									0.172502	0.495374	0.20609	0.244815	0.301387	-0.00581896
0.24369	-0.101952	-0.070664	-0.126034	0.41843	-0.0826624									-0.271843	0.632667	0.202749	0.219451	0.0463398	0.552632
0.412867	-0.0999716	-0.184766	-0.89313	0.0699411	0.348953									0.0319564	0.367358	0.297758	0.545649	-0.036164	0.217604
-0.200424	-0.133915	0.420627	-0.3036	0.206782	0.659628									0.782188	-0.000507194	-0.12527	0.37139	0.245147	0.235083
-0.318821	-0.28103	-0.456979	-0.382282	0.491252	0.41178									-0.258052	0.368958	-0.185687	0.073064	-0.00540583	0.414433
-0.319303	-0.164954	-0.188381	-0.434194	0.294622	0.708098									0.0545301	0.181072	0.0632203	-0.216877	0.249594	0.451758
0.189292	-0.292616	-0.214637	-0.629794	-0.0164768	0.0205638									-0.241341	0.601737	-0.000476274	0.550141	0.0927193	0.680997
-0.40742	-0.141893	-0.0343635	-0.294013	0.137477	0.0291227									-0.132733	0.395129	0.361512	0.381926	0.416103	0.423574
-0.313212	-0.529677	0.236691	-0.633925	0.478779	0.432559									-0.0612404	0.253998	0.229802	0.415412	0.231168	-0.600206
0.235619	-0.417862	-0.453702	-0.363163	0.11858	0.428765									-0.127338	0.574564	-0.0683779	0.117604	0.622937	0.486531
-0.356693	-0.131344	-0.390921	-0.468744	-0.324416	0.448521									0.35541	0.231562	0.0225446	0.564897	0.351218	-0.587902
-0.264378	-0.169225	-0.357522	0.350876	-0.439272	0.10776									-0.328369	0.271754	0.0425219	0.350991	0.0180525	0.352433
-0.459347	-0.0800478	0.104408	-0.10561	0.250398	0.0872841									0.729519	0.171773	-0.075845	0.247392	0.53214	-0.151948
-0.140947	-0.368734	-0.24622	-0.133241	0.324105	0.520908									0.0254639	0.168573	-0.0736414	0.115349	0.577668	0.219173
-0.363632	-0.0575115	-0.0954457	-0.539838	-0.0833123	0.308762									-0.316466	0.396353	-0.0661667	0.489015	0.038003	0.0704969
-0.30576	0.223913	-0.40563	-0.159554	0.512285	0.26096									-0.0292215	0.53666	-0.00520141	0.442006	-0.0908426	0.0941117
-0.238588	-0.314278	-0.017554	-0.435391	0.173713	0.334153									-0.28733	-0.458083	-0.281557	0.660789	0.471111	0.403227
-0.173888	-0.529632	-0.0640514	-0.034365	0.11192	0.377927									-0.184366	0.210322	-0.0583692	0.59032	-0.0505183	0.237047
-0.0189539	-0.256638	-0.746906	-0.61625	-0.0170315	0.0417643									0.0829596	0.457316	-0.222126	0.444235	0.40921	0.0304497
-0.0611283	-0.503506	0.090732	-0.456623	0.0582814	0.519507									-0.202452	0.555697	-0.0582108	0.298543	0.465798	0.12126
-0.15665	-0.0322584	-0.0486125	-0.323936	0.083871	0.275404									-0.144045	0.719557	-0.275895	0.457569	0.187599	0.572877
-0.168295	-0.243745	-0.0879793	-0.294374	0.286323	0.271941									0.0969815	0.191357	0.016814	0.673725	0.345517	-0.000891855
-0.0596355	-0.660458	0.602945	0.0802643	0.423412	0.152777									0.01304	0.453734	0.189445	0.382777	0.500367	0.00850594
0.0287253	-0.254682	-0.240755	-0.444368	0.687446	0.217352									0.101656	0.44587	-0.216016	0.292799	0.560074	0.383773
0.197498	-0.390789	-0.0743976	-0.493324	-0.0458022	0.267764									-0.234124	0.678111	-0.204746	0.450774	0.401564	0.00313201
-0.195607	-0.288054	0.151926	-0.48204	0.174122	0.425276									-0.17958	-0.00595737	0.0639909	0.432766	0.22891	-0.161845
-0.189729	-0.32793	-0.133598	-0.493661	0.238874	0.315755									-0.123057	-0.601666	0.202463	0.291726	0.509889	-0.209327
-0.05978	-0.423717	-0.452452	-0.421804	0.369258	0.422097									-0.270035	0.313222	0.159897	0.656616	0.366865	0.0170939
0.0807614	-0.714927	-0.384917	0.198877	0.170106	0.517917									-0.314515	0.604587	-0.20865	0.293572	0.0997677	0.140668
-0.250472	-0.291345	0.249419	0.0393269	-0.149639	0.206596									-0.0964008	0.472014	-0.0663346	0.63711	-0.0232897	0.880337
-0.199377	-0.754729	0.100099	-0.0770713	0.327503	0.161078									-0.133306	0.73393	0.125365	0.279626	0.350955	0.302019
-0.0270528	-0.385381	-0.651709	-0.220173	-0.121762	-0.0935273									0.622491	-0.267333	0.6198	0.278993	0.572435	0.28681
-0.248419	-0.553768	-0.132295	0.669091	0.417945	-0.00125277									-0.294711	0.100986	0.101618	0.571486	0.426342	0.161566
-0.274583	-0.609948	-0.0206323	0.0633821	0.0257034	0.15025									-0.116834	0.397235	0.143505	0.548353	0.387834	0.105679
-0.186657	-0.26874	-0.21302	-0.10171	-0.0960685	0.0893563									-0.156265	0.568293	0.593675	0.33516	0.0646981	0.262985
0.0034823	-0.371983	-0.0139106	0.489755	0.418469	0.00364245									-0.285846	0.308455	-0.17313	0.163806	0.63455	0.343811
-0.177963	-0.546713	-0.146735	-0.256749	0.155439	-0.305									-0.393895	0.584292	-0.134436	0.0316712	0.328369	-0.358993
-0.672794	-0.271631	0.0221266	-0.495792	0.248186	0.235845									-0.288895	0.0126847	0.0967172	0.390197	0.0722707	-0.0835814
-0.0600704	-0.459341	-0.221912	-0.115829	-0.0969976	0.00853515									-0.397028	0.443746	0.00620752	0.559218	0.748581	0.209122
-0.320111	-0.192332	-0.661893	-0.387732	-0.0893891	0.204796									-0.293759	0.0390516	0.242247	-0.395956	0.371651	0.346313
-0.0198474	-0.128196	-0.339444	-0.317144	0.48293	0.00211085									-0.368422	0.204824	0.510822	0.614281	0.454132	0.00648754
-0.344254	-0.0403058	-0.553411	-0.399268	-0.102832	0.122324									-0.15392	0.251638	-0.571124	0.406351	0.308553	-0.279594
-0.216818	-0.508656	-0.31758	-0.107129	0.326592	0.222916									-0.463949	0.415086	0.0772189	0.427929	0.501716	-0.208459
-0.10336	-0.15746	-0.248692	0.573257	0.413141	0.441111									-0.310045	0.433216	-0.325782	0.52814	0.377942	-0.179945
-0.349518	0.0216403	-0.222561	-0.357169	0.221989	0.146315									-0.296444	0.130811	-0.0840261	0.0104648	0.323142	-0.449722
-0.027712	0.012587	0.0953814	-0.311191	0.65992	-0.0263395									-0.328751	0.207393	0.126365	0.321129	0.0954101	0.0490787
0.336267	-0.137135	-0.369026	0.317885	-0.0443287	-0.0626246									-0.229152	0.194959	-0.0533324	0.664245	0.620461	0.117975
-0.201467	-0.837526	-0.067074	-0.66184	0.355852	-0.0494603									-0.123904	0.270314	-0.0616944	0.228057	0.324333	0.0753153
0.00487827	-0.173322	0.141905	-0.153265	-0.154592	0.0929088									0.171989	0.0128941	0.206898	0.105948	0.285333	-0.283023
0.272348	-0.000477813	0.236634	-0.233748	0.0181466	0.586724									0.0459813	-0.149493	0.0965852	-0.0541724	0.729394	0.227747
0.520976	-0.204459	-0.0964275	-0.0751081	-0.126896	0.404978									0.392802	0.192211	-0.0129653	0.523327	0.556673	-0.161307
-0.43467	-0.269325	-0.123062	-0.270162	0.411906	0.457262									-0.108499	0.027224	-0.387617	0.338323	-0.0322029	0.116207
0.397562	-0.354507	0.328381	-0.187405	-0.202779	0.111715									-0.287594	0.259365	0.433518	0.404604	0.00804162	0.247878
-0.0524246	0.102955	0.596037	-0.161591	-0.163521	0.123795									-0.353103	-0.481408	-0.18769	0.411228	0.212678	0.0825445
-0.506326	0.0834807	-0.0740031	-0.47031	0.504827	-0.031282									0.408915	-0.196052	0.230555	0.439382	0.166294	-0.102558
-0.749438	-0.0289657	-0.338563	-0.234924	0.0642413	-0.0338631									-0.26315	-0.303681	0.493993	0.309516	0.115118	0.0677301
-0.0233623	-0.18434	-0.616611	-0.0349467	-0.032579	0.247054									-0.328547	0.319072	0.19413	0.460713	-0.0250821	-0.139918
-0.568179	-0.28725	-0.0853313	-0.275303	0.326001	0.526667									0.069984	0.573268	0.623199	0.250319	0.474659	0.255292
0.0144197	-0.199219	-0.166845	-0.235357	-0.0529394	0.343503									0.259155	0.565531	0.5902	0.368969	0.347614	-0.295719
-0.483266	-0.75169	-0.19627	-0.369466	-0.0603621	0.492367									-0.240081	0.713321	0.169212	0.422765	0.0307558	0.23157
0.100279	-0.582752	-0.274313	-0.5378	0.197914	0.149591									-0.357315	0.302488	-0.0405628	0.385058	0.440344	-0.390943
-0.345487	-0.445971	-0.0933486	0.0232694	0.205317	0.538029									0.463072	0.466278	0.718015	0.0223273	0.0734323	0.0291809
-0.345832	-0.0236664	0.0244733	-0.243839	0.0490821	0.196283									-0.0173406	0.559476	0.67297	0.290283	0.523362	0.326982
-0.678293	-0.289121	0.265759	0.373664	0.388205	0.184343									0.429238	0.418201	-0.158108	0.432584	0.515328	-0.0429614
-0.373178	-0.0928476	-0.228096	-0.1528	0.231505	0.448976									0.204608	0.667328	-0.141155	0.496152	0.894945	0.127142
-0.604273	-0.0168675	-0.153119	-0.424911	0.438149	0.28507									-0.384027	0.451629	-0.34255	0.363635	0.544633	0.462451
-0.175222	-0.537747	0.396054	-0.74646	0.413852	0.374329									0.00757417	0.53968	0.11472	0.321062	0.361407	-0.167778
-0.403823	-0.20833	0.254733	-0.206419	-0.151132	0.231882									-0.384537	-0.217329	0.642425	0.504395	0.270279	-0.350466
-0.594539	-0.739616	-0.162001	-0.470934	0.483502	0.0592867									-0.284927	0.453199	0.728759	0.433868	0.577449	0.364647
-0.40496	-0.562391	-0.223185	-0.437213	0.447116	0.317506									0.209798	0.267031	0.556232	0.304351	0.370233	0.0180198
-0.0218006	-0.208716	0.176346	0.0308713	0.554926	0.373347									0.551752	0.648089	0.182342	0.491513	0.168204	0.102323
-0.57849	-0.291103	-0.308785	-0.469998	0.232505	0.360955									0.141001	0.734979	0.293929	0.556368	0.251356	-0.362811
-0.307976	-0.117976	-0.436244	-0.50596	0.498032	0.182968									-0.124787	0.549452	-0.488645	0.406537	0.94806	0.380647
-0.344054	-0.263743	-0.329958	0.160449	0.459353	0.30369									-0.439316	0.523328	-0.206063	0.428428	0.222481	0.0104073
-0.204453	-0.00478179	0.0339237	-0.114073	0.2839	0.0266599									0.00696266	-0.00132079	0.22554	0.0846918	0.253477	0.172135
-0.171	-0.603637	-0.13528	-0.278262	0.709825	0.181437									-0.509508	0.614606	0.127367	0.38149	0.578884	0.316159
-0.746967	0.0692926	-0.260113	0.017586	-0.33248	0.215635									-0.0393651	0.606885	0.40032	0.244614	0.0652253	-0.0784826
-0.134062	-0.575543	-0.0766359	-0.519953	0.667472	0.446687									0.201717	0.286918	0.451921	0.545112	0.366483	0.432627
-0.746371	-0.597723	-0.382691	-0.50302	0.573284	-0.00298847									-0.176426	0.733287	-0.301319	0.476782	0.614644	0.0216075
0.0465143	-0.22564	0.322486	-0.518238	0.190057	0.277657									0.0787401	0.354082	0.427942	0.442368	0.110301	0.275184
-0.416698	-0.0519083	0.407412	-0.58468	0.575748	0.492028									-0.214365	0.644143	0.128971	0.597309	0.633398	0.320434
-0.120411	-0.555736	-0.289692	0.00863148	0.477374	0.276262									-0.303426	0.0713485	0.11729	0.366862	0.325127	-0.0179348
-0.459973	-0.36267	0.298333	-0.37402	-0.105873	0.547176									-0.193605	0.383737	-0.136144	0.433018	0.48326	-0.0465081
-0.0674394	-0.0616345	-0.125293	-0.424482	0.250306	0.499008									-0.159029	0.36351	-0.0632625	0.347315	0.764132	-0.0420569
-0.484737	-0.251221	-0.292233	-0.383368	-0.13133	0.126725									-0.131538	0.161779	-0.36472	0.469434	0.189138	0.313341
0.170794	-0.451491	-0.0886158	-0.286787	0.313365	0.165324									-0.655553	0.432721	0.0942539	0.497943	0.4624	-0.0626783
-0.499338	-0.180031	0.437695	0.116408	0.554459	-0.0125756									0.488425	0.275601	0.599395	0.089497	0.598241	-0.126065
-0.0258309	-0.553633	0.179418	-0.066149	0.345423	0.10376									-0.108373	0.378039	0.635018	0.109081	0.317451	0.223053
-0.249721	-0.141233	-0.303575	0.296217	0.530449	0.608161									-0.137011	0.509256	-0.339918	0.323826	0.282132	0.438799
-0.214325	-0.230025	-0.540064	-0.309674	0.207784	0.488341									-0.0553409	0.540058	-0.0418432	0.403405	0.743417	-0.0794705
0.182369	-0.209158	-0.0808786	-0.0598155	0.39878	0.430346									-0.147655	0.332788	0.518528	0.182924	0.31256	0.23111
-0.224435	-0.219626	-0.0487879	-0.0562274	0.490916	0.150425									0.253585	0.432974	-0.172301	0.404758	-0.00501389	-0.096049
0.355889	-0.27013	-0.228926	0.468999	0.243088	-0.138411									-0.128631	0.626555	0.331424	0.0106978	0.635657	0.190629
-0.181909	-0.345269	-0.20874	-0.0145665	0.501775	0.272225									-0.180979	0.63982	-0.386394	0.520379	0.254495	0.471663
0.184573	-0.445931	-0.0988819	0.178235	0.6579	-0.00971298									0.144961	0.3873	0.275433	0.104474	0.658041	0.138921
-0.354026	-0.642759	0.225018	-0.136946	0.193454	0.080658									-0.382972	0.505906	-0.328141	0.519929	0.72047	0.333908
0.00687011	-0.286419	-0.17247	-0.382193	-0.0153243	-0.27741									-0.195925	0.393188	-0.00605011	0.545496	0.287751	0.267464
-0.437869	-0.181577	-0.485565	-0.342212	0.11513	-0.0689435									-0.199888	0.244832	0.408157	0.171748	0.20716	0.074108
-0.152941	-0.59424	0.326824	0.427984	0.567088	0.303561									0.0800687	0.690506	0.32879	0.718514	0.45466	0.186598
-0.498748	-0.478399	0.139682	0.333842	0.590818	0.001485									-0.127815	0.315382	0.656203	0.434247	0.724168	0.158563
-0.123144	-0.313875	-0.260444	0.442631	-0.25205	0.527869									-0.207722	0.563228	-0.0839481	0.317031	0.517738	-0.19803
-0.213011	-0.455826	0.00670452	-0.308973	0.139848	0.294709									0.514742	0.351159	-0.0134091	0.630246	0.880532	-0.213968
0.326759	-0.270609	0.171106	-0.151975	0.638452	0.381264									0.553085	0.626809	0.384622	0.397799	0.439868	-0.497724
-0.334668	-0.148733	-0.648829	-0.236059	0.304545	0.241059									0.224509	0.452536	0.444077	0.553051	0.432346	-0.0498263
0.373869	-0.0820421	-0.36992	-0.0878312	0.0608926	0.310685									0.204112	0.614442	0.0266635	0.567788	0.118844	0.00768858
-0.287608	-0.532245	-0.270531	0.460989	0.424117	0.345162									0.201396	0.723742	0.00920095	0.429371	0.648003	-0.385473
-0.0177273	-0.330013	0.327668	0.39208	0.655875	0.0497273									-0.00814108	0.657683	0.519173	0.53486	0.560954	0.0651876
-0.701098	-0.208183	0.139483	0.0640237	0.000196694	-0.753041									0.357457	0.694416	-0.531972	0.54789	0.796401	-0.326664
-0.0202248	-0.429147	-0.127971	-0.286354	0.370763	-0.546989									-0.464883	0.539904	0.0425906	0.435131	0.505168	0.0960083
-0.0755984	-0.268836	0.264092	-0.0162774	0.435528	0.393371									-0.190486	0.658854	-0.233953	0.282259	-0.061485	0.0689542
-0.164149	-0.382116	-0.281196	-0.313839	-0.115905	0.500178									-0.105509	0.639568	0.618788	0.532037	0.316982	0.35542
-0.000128285	-0.240064	-0.050221	-0.241828	0.641057	0.30166									-0.207429	0.507693	-0.0852643	0.236777	-0.0930617	0.176779
-0.396644	-0.302143	-0.0435182	-0.121335	0.569845	0.330173									-0.301317	0.572598	0.402359	0.0667836	0.524708	0.277624
0.613309	0.346902	-0.369909	-0.0828376	0.0626316	-0.0248716									-0.288176	0.653366	-0.252161	-0.0404034	0.784149	0.238802
0.0438259	-0.578167	-0.155372	-0.281416	0.624277	0.13716									-0.428474	0.671056	0.219424	0.540517	0.572064	0.186032
-0.408282	-0.673059	-0.298892	-0.0556783	0.381616	0.303903									0.0199627	0.377962	0.337553	0.259462	0.0620203	0.0770979
-0.109265	-0.455987	0.469966	0.332342	0.0667377	0.0558958									-0.175329	0.608925	-0.264566	0.00981371	0.223795	0.364951
-0.116777	-0.245874	-0.0203652	-0.161184	0.768911	0.37367									-0.248115	0.652608	0.288476	0.0149739	0.234328	0.0485313
-0.119847	-0.521799	-0.017757	-0.364711	0.0291526	0.506636									-0.401126	0.464989	0.368158	0.302063	-0.184938	0.102379
-0.242884	-0.0447735	-0.563575	-0.058093	0.102254	0.248437									-0.191779	0.653306	-0.197671	0.588406	0.0528846	0.261149
0.211478	-0.1994	0.194466	-0.825284	0.326228	0.456469									0.15468	0.719228	0.594621	-0.00213737	0.518061	0.126979
0.0107242	0.214057	-0.328628	0.122852	0.134336	0.289663									-0.00367857	0.30576	0.49185	0.290855	0.343853	0.0633805
-0.173888	-0.186719	0.502538	0.351361	0.445848	0.171319									-0.557914	0.66206	0.153691	0.317937	0.353651	0.107694
0.0087265	0.136726	-0.304333	-0.337088	0.24661	0.392718									0.157673	0.474926	-0.313603	0.460716	0.434846	0.423292
0.233163	-0.252617	-0.0943502	-0.0795963	0.0501982	-0.000717665									-0.0997632	0.581421	0.236855	0.441873	0.00279653	0.32482
-0.19969	0.167806	-0.0988788	0.293806	0.25412	0.191619									-0.488922	-0.446684	0.654574	0.168397	0.323959	0.303005
0.068483	-0.673553	0.109302	-0.0756738	-0.0937136	-0.128534									-0.0368824	0.546943	0.588364	0.690291	-0.0181945	0.259506
0.179835	-0.442203	-0.323443	-0.183892	0.125945	-0.357302									-0.353184	0.498184	0.155533	0.439787	-0.0338472	-0.044456
-0.238657	-0.412237	-0.0173086	0.626732	0.507681	0.462585									-0.456082	0.508538	0.522034	0.684519	0.300636	0.212361
0.0320392	-0.211096	-0.0223756	-0.494077	0.522954	0.367121									-0.0284984	0.598985	0.846618	0.491057	0.135285	0.312013
-0.3381	-0.00793228	0.0672169	-0.270824	0.460027	0.262003									-0.216186	0.493292	0.463934	0.255964	0.0563962	0.13395
0.0366189	-0.131821	-0.127879	-0.32822	0.0454619	0.327286									-0.263243	0.159312	0.864039	0.276873	0.122483	0.649468
0.00053927	-0.220264	0.148191	-0.00850918	0.192486	0.0707826									-0.13994	0.505301	0.155456	0.62492	0.0402801	-0.00556825
-0.0505495	-0.401309	-0.278596	0.423954	0.11754	-0.104866									-0.0308616	0.600396	0.00905576	0.460823	0.00211104	0.166488
-0.0426849	-0.113205	-0.134914	0.705177	0.23095	0.0110132									-0.366223	0.606337	0.254587	0.513131	0.278162	0.45712
0.22769	-0.317335	0.390129	-0.342552	0.444022	-0.0828689									-0.0625118	0.434956	0.12752	0.441645	0.342941	0.490739
-0.254344	-0.126381	-0.248283	0.144018	0.283543	0.419683									0.0146229	0.495108	-0.064546	0.0288486	0.183523	0.0388295
-0.4666	-0.20936	-0.0244558	-0.335261	0.0176064	0.161693									-0.217684	0.400583	0.0521632	0.390444	0.0139524	0.476062
-0.000918337	-0.347952	-0.493594	-0.349928	0.44376	0.453924									-0.0616356	0.561486	0.158844	0.533844	-0.00337025	0.514345
-0.316297	-0.387391	-0.234481	-0.534684	0.0717151	0.0520201									0.249981	0.169571	0.322749	0.587049	0.427929	0.0399287
0.0140267	0.00765401	0.501262	-0.727053	0.0923545	-0.0690707									-0.427047	0.576368	0.0554366	0.654373	0.295429	0.463587
0.456721	-0.435807	0.320272	0.385842	0.0628109	-0.0418703									0.783204	0.088839	0.181052	0.63299	0.492393	0.187023
-0.0891085	-0.531735	0.024606	-0.578439	-0.0141972	0.490198									0.112296	0.417394	0.3446	0.555759	0.524146	0.133233
0.270221	-0.272005	-0.333023	0.591081	0.258274	-0.0902326									0.247522	0.528732	0.378719	0.676526	0.0775351	0.297759
-0.392406	-0.526584	-0.632107	-0.200287	0.0790052	0.508156									0.171427	0.778754	-0.0893579	0.442215	0.133261	0.632045
-0.390847	-0.179687	0.209808	-0.871166	-0.0343963	-0.0935376									-0.282997	0.0685649	0.616305	0.529043	0.217819	0.35658
-0.0892367	0.039746	-0.200418	0.209053	-0.046891	0.112037									-0.169081	0.431633	0.596343	0.117414	0.429811	0.317736
-0.0488675	-0.350069	-0.348819	0.0751487	-0.274426	0.0821639									-0.121422	0.477635	0.637281	0.494099	0.37459	0.110005
0.138595	-0.0336761	0.375526	-0.74951	0.159139	-0.10087									-0.228437	0.424974	0.282404	0.284213	0.0733658	0.145988
-0.059652	-0.235377	-0.177866	-0.198559	0.515831	0.126617									-0.0952927	0.534797	0.170415	0.807946	0.431161	0.276511
0.0687807	-0.540596	-0.33915	-0.806603	0.0578104	0.226989									0.182699	0.714167	0.652397	0.124882	-0.0265838	0.221132
-0.21298	-0.0812967	-0.569166	-0.0239319	0.0555569	0.45269									-0.129223	0.170883	0.0458108	0.264122	0.113875	0.451025
-0.262375	-0.139741	-0.331865	-0.103076	-0.257075	0.385155									-0.0602313	0.736841	0.360606	0.218651	0.214225	0.0882811
-0.117027	-0.191097	-0.3088	-0.723488	0.374242	0.460575									-0.226591	0.227241	0.294099	0.610516	0.347222	-0.198902
-0.360737	-0.266593	-0.0112689	-0.212043	-0.324084	0.228604									-0.497449	-0.0271119	0.212931	0.695192	0.190582	0.348319
-0.0839641	-0.353385	0.0133028	-0.731766	0.379046	0.307638									-0.290362	0.266102	0.529073	0.520602	0.246926	0.214053
-0.0946093	-0.174952	-0.795193	0.219758	-0.0481855	0.413542									0.026024	0.363329	0.394633	0.0174303	0.28636	0.39833
-0.31243	-0.00681853	-0.49509	-0.00807895	0.205429	0.1998									0.331806	0.171852	0.245489	0.673149	0.125778	0.217106
-0.337781	-0.113435	-0.243677	-0.719499	0.202203	0.163716									0.192638	0.100366	0.0879471	0.431806	-0.0814416	0.0769076
-0.176604	-0.0541606	-0.0875454	-0.697124	0.047343	0.318926									-0.628284	0.298572	0.419649	0.745611	0.126368	0.172198
0.00640679	0.137046	-0.19899	-0.0686839	0.111269	0.137317									0.191354	0.407402	0.114547	0.533429	-0.104774	0.783553
-0.115988	-0.101793	-0.215904	-0.359257	0.551244	-0.0580943									0.0914734	0.356542	0.0898901	0.398887	0.136947	-0.191171
-0.342807	-0.511314	-0.0987993	0.245871	0.0846993	0.375167									-0.0802747	0.471199	0.0818662	0.762824	-0.0282873	0.262507
0.18273	-0.397785	-0.147943	-0.202948	0.02011	0.691576									-0.366449	0.523821	-0.151837	0.514915	0.216454	0.339886
-0.253777	-0.48876	-0.451576	-0.292453	0.519544	0.0985997									-0.360396	0.221568	0.443577	0.497675	0.0218154	-0.370001
-0.130196	-0.336199	-0.137651	-0.291824	0.194272	0.212981									-0.140514	0.224558	-0.0957136	0.556935	-0.229088	0.211473
-0.0452636	-0.0810737	-0.461868	-0.29783	-0.186509	0.380607									-0.530308	-0.120732	0.0411655	0.469593	-0.0596132	0.225614
-0.385721	-0.221543	0.065711	-0.39437	0.0932952	0.263086									-0.433008	0.552095	0.582992	0.315663	-0.107599	0.0913413
-0.0775992	-0.0623952	-0.371933	-0.166013	0.0175988	0.0828685									-0.369042	0.491427	0.581605	0.603379	0.357461	0.444226
-0.0983708	-0.304347	-0.254294	-0.519423	-0.0175429	-0.165391									0.0303918	-0.0904286	-0.121271	0.535479	0.395967	0.278132
-0.093105	0.0254213	0.177198	-0.386895	0.241613	-0.101196									-0.0743195	0.0125409	-0.336419	0.559856	0.336394	0.223883
-0.292746	-0.248418	-0.33797	-0.224635	-0.0796202	0.53092									-0.307189	-0.0345398	0.0956869	0.516394	-0.0199704	0.377309
-0.456601	-0.561266	0.488922	-0.125164	0.268971	0.268098									-0.363616	0.272014	0.468712	0.570375	0.506776	0.248171
-0.214022	-0.345924	-0.43996	0.502252	0.45346	0.352856									-0.408487	0.376248	0.558043	0.291442	0.180451	0.459703
-0.0397532	-0.301777	-0.392519	0.343705	0.454593	0.116278									0.295214	0.4235	0.240843	0.831501	-0.0211081	0.172608
-0.470211	-0.0631419	-0.3874	0.543079	-0.206863	0.0522338									-0.0849341	0.420346	0.600275	0.468946	0.155407	0.0470507
-0.429054	-0.385086	0.0311077	0.00344937	0.615288	0.469072									-0.10192	0.490734	-0.354332	0.233104	0.0536168	-0.116667
-0.249072	-0.344281	0.283773	-0.067516	0.592963	0.00294203									-0.319213	0.587101	0.0388398	0.504525	0.513425	-0.284961
-0.51042	-0.468275	-0.508489	-0.142168	0.316583	0.585187									-0.335686	0.319935	0.0680731	0.722589	0.249928	-0.00126883
-0.320285	-0.40164	-0.211364	-0.160506	0.41224	0.294327									-0.131681	0.239566	0.0218975	0.0130252	0.242085	0.202556
-0.00590113	-0.330343	-0.257542	0.285289	-0.0606013	0.334295									0.274468	0.396606	-0.360269	0.299386	-0.050723	-0.50862
-0.615994	-0.372528	0.124206	-0.157876	0.198259	0.151175									-0.15176	0.109014	-0.29601	0.61781	-0.0319498	0.000924126
-0.283023	-0.406888	-0.10186	-0.285422	0.0135839	0.212156									-0.239178	0.543154	0.0549011	0.233239	0.353202	0.426356
-0.315848	-0.427967	0.175658	0.0590907	0.423532	0.225027									-0.378582	0.496843	0.547846	0.691739	0.136638	0.0893931
-0.578762	-0.294954	-0.030924	-0.0240406	0.0193844	-0.0142387									-0.316536	0.608171	0.331019	0.405367	0.0969579	0.37786
-0.355319	0.0978178	-0.512966	-0.383221	0.0452409	0.0107224									-0.210974	0.291716	0.40224	0.328117	0.0326704	0.656791
-0.370873	-0.463034	0.104473	-0.252643	0.495938	0.0860154									0.00459624	0.482565	-0.218941	0.67789	0.361686	0.359004
-0.470243	-0.50555	0.0153073	-0.468085	0.578765	0.049613									-0.152121	0.473844	0.55775	0.244371	0.129468	0.419961
-0.123541	-0.341401	0.115082	-0.141762	0.05854	0.157875									-0.212724	0.124297	0.481876	0.807915	0.0857288	0.212898
-0.0907725	0.00247214	0.571826	-0.755946	0.0805894	0.579126									-0.23866	0.0246946	-0.128691	0.21753	0.0226122	-0.132216
0.00976407	-0.312896	0.0934865	-0.418181	0.20398	0.16784									-0.133123	0.336252	0.520994	0.449635	0.120979	0.145722
0.306463	-0.581432	-0.0959074	0.083037	0.311948	-0.000779033									-0.206166	0.618463	0.0521093	0.294455	0.258173	0.330186
0.313565	-0.409194	-0.00564745	-0.711335	-0.00831615	0.479365									-0.0555441	0.421771	0.306654	0.362531	0.183269	0.387952
-0.128059	-0.0213669	-0.256646	-0.449497	-0.171298	0.247973									-0.00643945	0.266952	0.213552	0.528336	0.396698	0.167663
-0.428425	-0.0487429	-0.465805	0.775359	-0.198773	0.00386281									0.0667344	0.407425	0.558009	0.694997	0.00919034	0.0676721
0.0363513	-0.388692	-0.0714026	-0.0712017	0.299875	0.327774									-0.0111933	0.581231	0.107183	0.602189	-0.105779	0.734615
-0.328411	-0.433574	-0.0270526	-0.388317	0.261325	0.329903									-0.0964838	0.25157	0.40776	0.312267	0.00802777	0.468933
-0.435239	-0.566207	0.0329186	-0.283567	0.00818954	0.247615									-0.243037	0.414484	0.588901	0.379843	0.0952719	0.0381668
0.397117	0.00796882	0.0570076	-0.750085	0.258707	0.383622									-0.363695	0.678925	-0.110361	0.698585	0.127773	0.141849
-0.611799	-0.603593	-0.359357	-0.198947	0.531	0.467753									-0.364231	0.0509092	0.559642	0.401377	0.244491	0.10174
-0.224341	-0.31633	-0.120514	-0.321451	0.137135	0.359643									-0.241655	0.0877754	0.474981	0.544479	0.294738	0.413845
-0.226994	-0.543566	-0.297282	-0.206848	0.154171	0.294054									-0.321842	0.213383	0.332489	-0.292693	0.0265159	0.211698
-0.236625	-0.217474	-0.113456	-0.515383	0.661802	0.108592									-0.0685961	0.580892	0.241397	0.56835	0.0262958	-0.0585721
-0.266699	-0.291918	-0.409094	-0.706858	-0.0538845	-0.159582									-0.154392	0.264829	-0.207308	0.36176	0.348921	0.202503
-0.357394	-0.280471	-0.28689	-0.247351	0.0446907	0.16245									0.00541929	-0.0468527	-0.0982779	0.35572	-0.157867	0.160389
-0.283799	-0.529687	0.609133	-0.538071	0.340072	0.211946									-0.254825	0.0933382	-0.50516	0.601817	0.327898	0.547845
-0.274017	-0.137332	-0.0680216	-0.32095	-0.0584749	0.428358									-0.0409233	0.326968	0.081495	0.744085	0.146011	0.118905
-0.200893	0.142966	-0.317508	-0.0765814	-0.10583	0.448089									-0.0645951	0.765791	-0.182935	0.518151	-0.238081	0.532543
-0.287597	-0.638679	-0.349281	-0.448447	0.309965	0.0587639									-0.441867	0.59097	-0.586255	0.630986	0.284183	0.076236
0.266064	-0.456411	-0.0801651	-0.21426	0.250495	0.0325767									-0.125342	0.827162	-0.00202866	0.556827	0.251346	-0.117482
-0.0826824	-0.292356	0.0262834	-0.770402	0.37349	0.25174									-0.238408	0.609859	0.332002	0.845834	0.318069	0.290333
-0.387547	-0.0437206	-0.0219746	0.127436	0.276464	0.0123012									-0.558546	0.448377	0.2425	0.656741	0.349442	0.13841
-0.30351	-0.575974	-0.0824827	-0.353251	0.395139	0.0391848									-0.186396	-0.197447	0.197411	0.565198	0.258555	-0.00217492
0.00631879	-0.630882	-0.190976	-0.30328	-0.145697	0.382762									-0.19587	0.501036	0.463824	-0.157757	0.246926	0.429219
3.73994e-05	0.06653	0.0746933	-0.323541	0.240868	0.0179163									-0.251444	-0.0297747	0.180791	0.645755	-0.0588188	0.191648
-0.373773	-0.197777	0.0666564	-0.368797	0.391	0.0142265									-0.300647	0.416507	0.00473838	0.366032	0.332771	0.327314
-0.210872	0.280035	0.171509	0.0561155	0.230339	-0.0635476									-0.46284	0.674305	-0.314571	-0.112784	0.501337	0.185884
0.00462226	-0.354062	0.681644	-0.759951	0.34694	0.00345563									-0.381126	0.305114	-0.0439763	-0.0949751	0.246903	0.537086
-0.425565	-0.315124	-0.125765	-0.395215	0.0416666	-0.0159412									-0.266775	0.337674	0.107455	0.736859	0.325452	0.438496
-0.140388	-0.28501	0.274582	-0.13445	-0.0134034	0.244483									-0.195111	0.645255	-0.158572	0.213557	0.600993	-0.130737
-0.309155	-0.145954	-0.556083	-0.625855	0.166275	0.122352									-0.0599442	0.298095	-0.0261062	0.0943157	0.0413991	-0.0182111
0.115978	0.207083	-0.455931	-0.440667	-0.108454	0.0999218									0.00386767	0.295921	0.145538	0.428609	0.730215	0.579249
0.211047	0.0331676	-0.480441	-0.145129	0.323101	0.433615									-0.483483	0.487226	0.097745	0.0845884	0.504065	-0.0139187
-0.313587	0.209512	-0.258064	-0.0985077	0.348879	0.066014									-0.0029646	0.479146	0.103879	-0.154137	0.328191	-0.27643
0.0120738	-0.0984341	-0.28934	-0.51972	0.0372663	0.0925776									-0.204828	0.125497	0.269696	0.224474	0.438538	0.520539
0.173066	-0.25866	-0.530427	-0.198748	-0.0198818	0.150622									0.296973	0.482429	-0.0731604	0.293763	0.0824781	0.0410451
-0.192814	-0.299856	0.49045	0.76582	0.499094	-0.18341									-0.179965	0.352862	0.03063	0.343752	0.338603	0.0273755
0.056928	-0.397571	0.611507	-0.08937	0.423592	-0.0433368									-0.201567	0.480821	0.119111	0.704202	0.365721	-0.075051
-0.150631	-0.1498	-0.0771863	0.0843868	0.516663	0.276525									-0.0159725	0.327349	-0.292162	0.00432994	0.29417	0.536767
0.0783094	-0.137161	-0.288786	-0.2647	0.705537	0.175581									-0.285724	0.366214	0.427046	0.184019	-0.0219236	-0.0631
-0.357163	-0.0567016	-0.391179	-0.446229	-0.0863056	-0.0527553									0.241806	0.36919	-0.3059	-0.0584925	0.614274	-0.0733039
-0.114821	-0.522539	0.0647816	-0.474356	0.719722	-0.0212388									-0.165435	0.525386	0.104777	0.2042	0.349409	0.294179
-0.20711	-0.346759	0.328792	-0.139792	0.136077	0.0724308									-0.0497447	0.557986	0.359206	-0.0415895	0.0212467	0.199681
-0.559253	0.00358532	-0.446443	0.130883	0.116596	0.0315348									-0.0933296	0.225589	-0.112785	0.305909	0.0928056	-0.0703143
-0.534433	-0.509087	-0.0241213	-0.424682	-0.0164184	-0.053822									-0.248835	0.535965	-0.146576	0.212234	0.316336	0.392992
-0.275311	-0.372083	-0.2544	-0.50096	-0.112434	-0.141059									0.330247	0.183839	0.0524311	0.497991	0.347983	0.0607836
0.0802788	-0.0742302	0.505789	-0.159044	0.080565	0.172436									-0.314691	0.658664	-0.00466347	0.435755	0.0726382	0.26742
-0.228786	-0.0546985	-0.0951095	-0.428392	0.385466	-0.118794									-0.261132	0.292182	0.501066	0.205253	0.542997	0.415837
-0.00165196	0.20931	0.567669	-0.49338	0.386566	-0.00214793									-0.0462501	0.598478	-0.130106	0.159956	-0.0449898	-0.0285613
-0.151382	-0.557559	-0.185854	-0.262151	-0.00443233	-0.133057									-0.270463	0.0967489	0.497024	0.372495	0.560397	0.120039
-0.20426	-0.322174	-0.0730599	-0.127571	0.140895	0.140132									-0.0747758	0.181345	0.09342	0.010465	-0.123239	0.16944
-0.336586	-0.0180415	0.335372	-0.251503	0.0110466	0.4349									0.465983	0.386742	-0.268264	0.219923	0.221037	-0.247197
-0.153351	-0.281655	-0.182928	-0.394405	0.461582	0.126378									-0.210845	-0.21931	0.507872	0.34188	0.302601	0.295672
-0.224545	-0.0940499	0.25028	-0.253341	0.358861	-0.0699072									-0.156467	-0.295435	-0.0878743	0.309301	0.352991	-0.218452
-0.377097	-0.00594604	-0.0449311	0.270231	0.139387	-0.103626									-0.27822	0.349292	0.424541	-0.054999	0.0227796	0.420627
-0.251915	-0.529337	-0.180878	-0.336026	0.168877	0.0996718									-0.282537	0.418196	0.392886	0.206007	0.120464	0.190525
-0.216531	0.236265	0.105347	-0.459157	0.115483	0.0848447									-0.0551638	0.761453	0.202113	0.606764	0.340816	0.0607095
-0.585458	-0.113969	-0.345025	-0.0150837	0.159583	0.0146927									-0.128276	0.119786	0.33547	0.130546	0.12353	0.136465
-0.103317	-0.198343	-0.628543	-0.33317	0.602	0.0870498									0.437946	0.397821	-0.462813	0.00464663	-0.18054	0.014665
-0.190357	0.0238361	0.609706	-0.347069	0.481189	0.516902									0.121468	0.389868	0.398004	-0.143528	0.272446	0.560562
-0.28043	-0.718985	-0.633771	-0.157041	-0.00805725	0.00493706									0.384664	0.365106	0.563737	0.183052	0.319533	0.0630273
-0.0874487	-0.0896217	0.255363	0.44223	0.351911	0.385739									-0.183853	0.0496493	0.346153	0.391124	0.236452	0.216806
-0.232974	-0.573485	-0.369118	-0.34273	0.0382775	0.349918									-0.101521	0.0964447	0.111852	0.652102	0.640314	0.307835
-0.489896	-0.0798964	-0.331886	0.405593	0.231738	-0.0897916									0.0636379	0.489433	0.423038	0.155042	0.391204	-0.0594186
-0.122833	0.0798012	-0.320706	-0.439615	-0.0896848	-0.214671									-0.284908	0.551928	0.16042	0.540104	0.0222969	-0.364082
0.592411	-0.354471	0.315164	-0.265127	-0.0612157	0.608784									-0.0470899	0.507181	0.362345	0.254947	0.460217	0.732759
-0.146919	-0.12632	-0.0520446	0.303014	0.28998	0.291625									-0.167669	-0.0918043	-0.185574	0.261206	-0.00865697	0.135736
-0.0896226	-0.405252	-0.0308138	0.357431	0.457888	0.0137793									-0.226824	0.34916	0.1055	-0.0731895	-0.0173236	0.0535766
-0.204977	-0.367945	-0.0142567	-0.0378123	-0.28193	0.408614									-0.390248	-0.0200646	-0.327634	0.409066	0.342764	0.195193
-0.208009	-0.712817	-0.200477	-0.304334	0.109557	-0.134277									0.263486	0.596175	0.409571	0.743397	0.498584	0.501486
-0.156659	-0.25493	-0.452592	-0.329455	0.0611252	0.136765									-0.354742	0.614957	0.457225	0.0648831	0.353748	0.397665
-0.367761	-0.448865	-0.0114609	-0.272515	0.156868	0.221487									-0.25207	0.44707	-0.00922589	-0.0134172	0.18514	0.427159
-0.126966	-0.0983396	-0.119375	-0.078374	0.329995	-0.349795									-0.186566	0.153694	-0.297024	0.325101	0.349995	0.613492
-0.0544654	0.174445	0.167442	0.0609281	0.572288	0.228538									0.141516	0.405385	0.316343	0.399463	0.399229	0.0748565
-0.135665	-0.36269	-0.069298	-0.166657	0.258027	0.0463281									-0.0471173	0.00838687	-0.35205	0.308983	0.069442	0.0791057
-0.367612	-0.0690699	0.0345333	-0.175588	0.393043	0.370715									-0.200396	-0.0291154	0.448804	0.597656	0.29244	-0.0331707
-0.204182	-0.0547887	-0.0605087	-0.440716	-0.21443	0.424213									0.0154921	0.380876	0.289796	0.478093	0.451624	-0.0277418
0.197291	0.30925	0.109014	-0.0834796	0.116194	0.339672									-0.647826	0.287417	0.409979	0.423354	-0.0386247	0.339622
-0.162745	-0.372668	0.0497154	-0.183857	0.443752	0.183288									-0.389983	0.163482	0.265581	0.0724257	0.353972	0.148124
-0.0785578	-0.0260664	0.0492601	0.148676	0.531269	0.325399									0.296568	-0.0648652	-0.151474	0.369582	-0.0457867	-0.0105978
0.232482	-0.106836	-0.080892	-0.340517	0.464387	-0.189359									0.540033	0.327118	0.389447	0.203695	0.187286	0.357919
-0.109734	-0.579896	-0.020722	-0.253547	0.538895	0.397869									-0.284088	0.347211	0.420292	0.359192	0.339375	0.264366
0.154776	-0.0372495	0.0853366	-0.25191	0.438432	0.220224									-0.246864	0.010149	-0.00180817	0.164985	0.257084	-0.188566
-0.237701	-0.315811	0.205316	-0.463493	0.330488	0.206614									0.615909	0.0201675	0.29315	0.643277	0.0457841	0.257546
0.0208988	-0.158095	-0.0886555	-0.0829769	0.068907	0.293805									-0.180925	-0.0824639	0.291888	0.0368608	0.203833	0.272012
-0.383041	-0.0636364	0.0952401	-0.481037	0.325412	-0.236201									-0.327331	0.576309	0.302735	0.48182	0.176381	0.572199
-0.655774	-0.362463	-0.0621108	-0.239354	0.618024	0.485222									-0.182026	0.381308	-0.232364	0.403305	0.135449	-0.0256609
-0.201256	-0.094209	0.339404	0.0308883	0.123586	0.269143									-0.0547657	0.3622	0.0966823	0.279819	0.0591863	0.263088
-0.288439	-0.139874	-0.0284396	0.01716	0.29045	0.421895									0.28759	0.316473	-0.588974	0.464193	0.413022	0.268743
-0.423692	-0.407481	-0.214069	-0.04394	0.207521	-0.185722									-0.283878	0.552068	0.475087	0.58357	0.312557	-0.277835
-0.232701	-0.342548	0.0813178	-0.40312	-0.0288613	0.108723									0.265099	0.517422	-0.417189	0.518645	0.376504	0.427755
-0.0820448	-0.448972	0.151738	-0.0389404	0.417018	0.260135									-0.0715074	0.589998	0.273989	0.14601	0.351885	-0.198371
-0.249765	-0.215647	-0.336795	-0.445743	0.373413	0.619176									-0.0184398	0.564241	0.0267222	0.572601	0.569963	0.0205606
-0.0764325	-0.187194	-0.28844	-0.343992	0.426632	0.174584									-0.240138	0.420911	-0.198296	0.605526	0.0131401	-0.0126738
0.121638	-0.242108	-0.20224	-0.109141	0.0731905	0.167942									0.48953	0.00716177	0.0341289	0.2177	0.119721	0.45898
-0.2493	-0.766263	-0.250218	-0.326067	0.204209	0.341104									-0.476971	0.450709	-0.0585611	0.110665	-0.0342907	-0.0642405
-0.265523	-0.522301	0.0523341	-0.148425	0.524766	0.16124									0.547806	0.6167	-0.0109606	0.387114	0.492314	0.131243
-0.133661	-0.260591	0.374192	-0.220748	0.622363	-0.0420923									-0.277684	0.682417	-0.254802	0.377151	-0.00992058	0.0301553
-0.390456	-0.387088	-0.226022	-0.455857	-0.20002	0.321265									-0.407893	-0.000216851	0.0229217	0.403395	0.103764	-0.37817
-0.251159	-0.785326	0.636317	-0.326016	0.384043	0.193947									-0.295429	0.364331	-0.254335	0.234593	0.259246	0.199173
-0.459666	-0.28798	0.113963	-0.537076	-0.168522	0.0512178									0.0433495	0.430637	-0.463725	0.399275	0.504719	0.464935
-0.203159	-0.508548	0.550228	-0.28424	0.0434387	0.392142									-0.229141	0.439351	0.0201159	-0.0379883	0.520284	0.380259
0.0061886	-0.103878	-0.114299	0.0594421	0.341446	0.537559									-0.316694	-0.027032	0.305291	0.122105	0.00577454	-0.160667
0.0877136	-0.440408	-0.0433679	-0.438266	0.324026	0.00516208									-0.0496221	0.657488	-0.307725	-0.068917	-0.217539	0.203595
-0.0856763	-0.459117	-0.0120522	0.011048	0.288862	0.0937534									0.274679	0.61805	-0.444198	0.293891	0.0225698	0.256643
-0.377923	-0.361776	0.262413	-0.206615	0.294028	0.156113									-0.119748	0.535876	0.587132	0.350213	0.0613799	-0.40877
0.0353129	-0.319022	-0.273594	0.439822	-0.0434092	0.018038									-0.165344	0.346218	0.0615111	0.295317	0.537875	0.594064
-0.28847	-0.234145	-0.139421	-0.409767	0.268473	0.471287									-0.384287	0.72693	-0.239351	0.502577	0.593772	0.00761404
-0.399613	-0.241939	0.253777	-0.357313	0.668595	0.14313									-0.0576895	0.422891	-0.258353	0.170125	0.212921	0.0472351
0.0191778	0.00524908	-0.0671709	-0.344387	0.0871471	0.00570418									-0.138207	0.321675	0.00807079	0.307569	0.271024	0.0547012
-0.223608	-0.658738	0.480422	-0.369637	0.27941	-0.0600805									-0.00183863	0.046879	0.721476	0.446298	0.219512	-0.166834
-0.184292	-0.194789	0.0839408	-0.410837	0.379896	0.0280813									0.0490282	0.276926	-0.0713139	0.601793	0.167265	0.349894
-0.418392	-0.0804563	-0.486615	-0.69153	0.272552	0.432299									0.411642	0.113798	-0.0941523	0.46852	0.161236	0.290719
-0.161081	-0.226293	0.309354	-0.0415498	0.581441	0.13282									-0.190082	0.662556	0.361136	0.63479	0.564539	0.0743307
-0.537338	0.00796011	0.124466	-0.116146	-0.075987	-0.0493238									-0.27897	0.320133	0.0667739	0.110222	0.0260268	0.0752904
-0.194178	-0.128901	0.383176	-0.131346	-0.0134451	0.0798692									-0.259299	0.332851	0.0759139	-0.0427041	0.0557504	0.470143
-0.217895	-0.572585	0.109202	-0.0518153	0.302061	0.240651									0.294117	0.325709	-0.144615	0.740167	0.254356	0.268659
-0.47836	-0.296593	-0.67743	-0.0814523	0.0517738	0.00197946									0.130062	0.00824061	0.481237	0.502269	0.106319	0.327701
0.0309805	-0.458655	0.072211	-0.108912	0.443198	0.384983									0.0747259	-0.118655	0.01106	-0.202713	0.354126	0.323117
-0.503349	-0.0908396	-0.100235	-0.39752	0.363304	0.130003									0.0650802	0.115817	0.0852954	0.126794	0.0831838	0.0756829
-0.411972	-0.384396	-0.180053	0.155921	0.413062	0.19039									-0.120022	0.0757076	-0.288522	0.411471	0.324105	0.330784
-0.408288	-0.289403	0.550785	0.0735558	0.573675	-0.112995									0.301726	0.825798	-0.19226	0.674568	0.246379	0.023098
-0.491903	-0.113028	-0.171053	-0.48926	0.068428	0.282328									0.467486	0.828713	0.383394	0.339835	0.196621	0.464323
-0.177379	-0.396226	0.363255	0.43745	0.189257	0.136081									0.385846	0.664139	-0.262565	0.262731	0.299194	-0.232084
-0.268902	-0.454624	-0.145507	-0.24281	-0.0677003	0.115979									-0.293306	0.660375	0.128444	0.447233	0.0735299	-0.18396
-0.309461	-0.448952	-0.146723	-0.456799	0.343952	0.197442									-0.26891	0.339356	-0.229077	0.438803	0.689896	0.553395
-0.203019	-0.27147	-0.624832	-0.324502	0.296232	0.474578									-0.529618	0.510605	-0.205804	0.821483	0.117134	-0.309872
-0.311195	-0.651602	0.134553	-0.375778	0.568127	0.489191									-0.286778	0.509184	-0.142487	0.0276379	0.268059	0.0758312
-0.176111	-0.334349	0.373925	-0.418204	0.499164	0.448154									0.066988	0.353547	-0.363269	0.63375	0.212668	0.361058
-0.350926	-0.426666	-0.365845	-0.48449	0.415868	-0.0676387									0.299637	0.592885	-0.208026	0.582546	0.339917	0.606257
-0.195956	-0.42056	-0.286861	-0.329048	0.337638	0.295473									-0.581706	0.54397	-0.028839	0.589065	0.311385	0.564066
-0.241154	-0.28309	-0.0328171	-0.536412	0.425071	0.429814									0.180341	0.65054	-0.0499745	0.720982	0.141455	0.467006
0.874316	-0.466761	0.0272095	-0.12943	-0.016486	0.0289749									-0.233443	0.590206	0.0991319	0.744312	0.162061	0.248582
-0.0733718	-0.0725156	-0.390426	-0.115689	0.471335	0.367235									-0.195648	-0.0473328	-0.0188822	0.457898	0.188401	0.435205
0.236208	-0.369504	-0.20438	-0.436951	0.325488	0.0912172									-0.191368	0.247916	-0.133248	0.512501	0.600047	0.518052
-0.0967567	-0.141012	-0.173966	-0.58139	0.458126	0.296584									-0.296117	0.611554	0.139833	0.83532	0.186909	0.532471
-0.128386	-0.0194231	-0.144088	-0.296997	-0.212152	0.223093									-0.0953069	0.613132	-0.305622	0.411836	0.574646	0.388167
-0.166521	-0.210004	-0.141726	-0.129206	0.0617731	-0.0175981									-0.0462043	0.197677	-0.373555	0.662375	0.0552522	0.0440641
-0.0512948	-0.271008	-0.527904	-0.0613026	0.0847555	-0.14691									0.125201	0.564484	0.371431	0.569644	0.504048	0.136635
-0.431613	-0.322307	-0.327654	-0.525744	0.386964	-0.178197									-0.141798	0.47152	-0.0204872	0.649017	0.0583649	0.46035
-0.201382	-0.521382	0.642351	-0.519581	0.382082	0.0431677									-0.0441033	0.502577	-0.345493	0.459021	0.415562	0.0677849
-0.225272	-0.425509	-0.216669	-0.340669	0.229569	0.211553									-0.139561	0.655547	0.104998	0.545762	0.293389	-0.0151312
-0.275697	-0.204495	-0.360403	-0.35968	0.368728	-0.16169									-0.124969	0.6338	0.205418	0.769254	-0.133381	0.480107
-0.574821	-0.148007	0.282784	-0.319833	0.232958	-0.0665656									-0.0943379	0.372396	0.212608	0.780035	0.270462	0.1959
-0.289783	-0.147836	-0.106907	-0.119794	-0.119594	0.483025									-0.0645362	0.784658	0.0164302	-0.268049	0.238947	0.194123
-0.355263	0.0300446	-0.0706319	-0.104017	0.166825	0.568134									-0.258898	0.423638	-0.0714532	0.623089	0.320335	0.235322
-0.165106	0.00193194	-0.211391	-0.30907	-0.0105158	0.309936									-0.229428	0.137779	0.412509	0.59633	0.520631	0.290056
-0.0255251	-0.426425	-0.265257	-0.586627	0.510966	0.523021									0.111137	0.511551	-0.220717	0.584713	0.269031	0.556882
-0.0916784	-0.545336	-0.151689	-0.270582	0.279477	0.326968									-0.0992967	0.564746	0.393237	0.750108	0.0115442	0.168633
0.0597154	-0.157323	0.00198968	-0.547182	0.219209	0.121838									-0.0537495	0.559211	-0.0274179	0.653981	-0.0609464	0.280763
-0.168565	-0.614848	-0.099967	-0.57453	0.596002	0.271365									0.509427	0.356244	-0.113901	0.740488	0.0894552	0.22227
-0.104531	-0.232925	0.343251	-0.198107	-0.0411497	0.259384									-0.178111	0.363647	-0.0815007	0.730961	0.278591	0.528672
-0.526	-0.193529	-0.435631	-0.212321	0.0759718	-0.0492734									-0.0693314	0.658678	-0.297567	0.724059	0.0105729	0.363419
-0.0820882	-0.493311	-0.184196	-0.0762176	0.248669	0.11843									0.130683	-0.220891	0.310019	0.636379	0.389579	0.396387
0.0236227	-0.146032	-0.166229	-0.225187	-0.0832228	0.229187									0.352382	0.245176	0.548401	0.729262	0.407608	0.263143
-0.482997	0.295692	0.639312	-0.162844	0.700708	0.125058									-0.252852	0.463807	-0.387825	-0.0425244	0.037895	-0.225293
0.0919268	0.0249759	0.675048	-0.316028	0.153022	-0.0277345									0.11218	0.124471	0.217627	0.652473	0.114535	-0.0404648
0.278388	0.11154	-0.490358	-0.364827	0.110783	-0.348168									-0.124572	0.374752	-0.130603	0.680176	0.308423	-0.298885
-0.0793621	-0.114426	-0.731876	-0.361607	0.551772	0.343849									-0.297789	0.233688	-0.192402	0.744864	0.339915	0.351277
-0.464331	-0.238822	0.311291	-0.590334	0.0180007	0.689549									-0.335943	0.570848	0.247364	-0.0111745	0.46854	0.0240517
0.34614	-0.248674	-0.228303	-0.317979	0.148759	0.115333									-0.0732653	0.454758	-0.0280267	0.657413	0.310883	0.482309
0.0594797	-0.19533	0.296702	-0.31903	0.166346	-0.364079									0.197069	0.00782523	0.260331	0.715278	0.306955	-0.0591237
-0.574799	-0.633314	0.315514	-0.11045	0.25352	0.274595									-0.119233	0.0699309	-0.354362	0.224608	0.481391	0.509793
-0.416176	-0.141037	-0.480589	-0.344977	0.0221609	0.13288									-0.190451	0.305863	0.0517722	0.116605	0.429479	-0.0869049
-0.414847	-0.256562	0.419637	-0.36994	-0.180386	0.501185									0.218691	0.471017	0.580301	0.688391	0.283238	0.441784
0.228937	-0.485821	-0.220059	-0.155804	0.174654	0.154039									-0.365117	0.157896	0.392851	0.630874	0.322983	0.418226
-0.180487	-0.342786	-0.37989	-0.204737	-0.0666567	0.0539139									-0.151972	0.584478	0.103022	0.846578	0.273997	0.26953
-0.400935	-0.388258	-0.338713	-0.0839824	0.274907	0.154857									-0.0558723	0.206908	0.493256	-0.126599	0.50392	0.392303
-0.474756	-0.151125	0.0852891	-0.50371	0.445634	0.367614									0.47072	0.224625	0.553532	0.716487	0.0296407	-0.63446
-0.206659	-0.0201524	0.402846	-0.408903	0.500867	0.0379628									-0.0104083	0.538884	0.282864	0.261262	-0.0174992	0.523078
-0.104328	0.489658	-0.103344	-0.108856	0.16123	0.351908									-0.243114	0.418173	0.603725	0.632816	0.620259	-0.148445
-0.125235	-0.125671	-0.337895	-0.569375	-0.279174	-0.144028									-0.0859848	0.471767	0.404025	0.67502	0.0135745	0.196924
-0.0460703	-0.292388	0.537576	-0.407349	0.453241	0.00913361									0.360263	0.542928	-0.222568	0.670331	-0.00835881	0.38053
-0.263091	0.030644	0.757669	-0.0611457	0.310179	0.270456									-0.206879	0.296779	0.180141	0.543982	0.336062	0.484793
-0.280422	-0.00223613	0.641363	0.222028	-0.0362161	0.138476									-0.200327	0.323414	0.258776	0.745942	0.0250184	-0.00503687
-0.232207	-0.522117	0.646224	-0.167532	0.193765	0.270541									-0.289655	0.537807	0.161944	0.641201	0.110517	0.0962245
-0.0300303	-0.551095	-0.0730184	-0.661532	0.187881	0.105234									-0.59851	0.434873	0.182549	0.68371	0.314948	-0.0584484
-0.170151	-0.228399	-0.411583	-0.210878	0.149453	-0.361101									-0.272543	0.650633	0.577186	0.555268	0.127753	0.318741
-0.00646598	-0.287435	0.0309196	-0.56219	0.516252	0.224677									-0.200053	0.355814	0.609829	0.722473	0.171059	0.302212
-0.105878	-0.184442	-0.33357	-0.327652	0.0605114	0.00584975									-0.177428	0.400327	0.314341	0.233227	0.305291	0.427277
-0.0804927	-0.321754	-0.0223237	-0.110589	0.449167	0.46404									-0.0022297	0.360617	0.310239	0.355369	0.417399	0.30284
0.0635814	-0.330704	-0.0194031	-0.228208	0.319133	0.171087									-0.259341	0.485819	0.493215	0.454727	0.437953	0.109313
0.0144028	-0.284853	-0.111514	-0.351878	0.542319	-0.197945									-0.0361434	-0.245456	-0.389398	0.0583327	0.0636155	0.545274
-0.405018	0.281223	-0.352441	-0.231201	0.316816	0.396941									-0.316932	0.490122	0.0131702	0.65421	0.137614	-0.261662
-0.187424	-0.372524	-0.0440942	-0.155281	0.241627	0.0902936									-0.00856718	0.516622	0.633228	0.662431	0.305626	-0.051974
-0.236543	-0.387118	-0.324574	0.254824	0.392805	0.15619									-0.141	0.588044	-0.154653	0.575575	0.00806048	0.47837
-0.0342822	0.206002	0.63072	-0.361962	0.305489	-0.00632732									-0.391918	0.130716	0.0626969	0.638629	0.484707	0.026311
-0.292768	-0.451913	0.674816	-0.480569	0.635057	-0.0799753									-0.28443	0.100534	0.624847	0.832253	-0.00118594	0.02421
-0.223061	-0.323052	-0.314806	-0.254739	0.116092	-0.0466047									-0.165957	0.539608	0.0342103	0.722145	0.304868	0.00794089
-0.608548	-0.381819	0.289605	-0.0714538	0.039767	0.278736									-0.359596	0.378278	0.445091	0.773825	0.388821	0.0514743
-0.019383	-0.225914	0.504689	0.182628	0.639644	0.522286									-0.154204	-0.0569508	0.34016	0.490355	0.38294	0.194926
-0.473054	0.0596069	-0.00397096	-0.462865	0.26786	0.101357									-0.184218	-0.116643	-0.316167	0.551754	0.0399663	0.449843
0.375337	-0.254891	0.143451	-0.419942	0.42089	0.481239									-0.0243635	0.63237	0.159714	0.552551	-0.196591	-0.124111
0.0657231	0.194312	0.0680399	0.379945	0.392719	0.291381									-0.103184	0.509665	-0.210016	0.351964	-0.0373704	-0.619919
-0.250034	-0.129956	0.207102	-0.0456272	0.363601	0.426973									-0.247198	0.468521	0.779835	0.523666	0.180907	-0.737193
-0.321178	-0.172725	0.0948925	-0.359367	0.697416	0.0543913									0.522528	0.512868	-0.308736	0.687375	-0.318594	0.553237
-0.105052	-0.199045	-0.196227	-0.381706	0.249604	0.150974									-0.231912	0.481454	0.577884	0.741002	0.497289	0.500663
-0.122221	-0.127735	0.0305093	-0.275693	0.256058	0.144308									-0.371637	0.409961	0.31992	0.44806	0.267084	0.203853
0.151196	-0.355171	-0.0471358	-0.873492	0.444024	-0.107818									-0.392018	0.0729723	0.100838	0.00600066	0.346842	-0.0818105
-0.310504	-0.0945143	-0.332517	-0.233503	0.34282	0.34101									-0.280173	0.0814816	0.0798078	0.420512	0.200513	0.108102
0.0232043	-0.0689619	-0.358095	-0.0878711	0.36852	0.138461									-0.17971	0.342265	0.0106935	0.107833	0.512437	-0.0682765
-0.228742	-0.442312	-0.305038	0.0353847	0.35107	0.229878									-0.597309	0.237112	-0.146292	0.608919	0.24615	0.14629
-0.0231396	-0.0990551	-0.18678	-0.187123	0.0227711	0.258121									-0.443473	0.0671257	0.761525	0.680342	0.281065	0.0747644
-0.459514	-0.0427653	0.425062	-0.402587	0.475554	0.55548									-0.427532	0.398062	-0.230184	0.207141	0.451199	-0.231529
-0.295441	0.223403	0.0707184	-0.757422	0.35321	0.463759									-0.217438	0.310384	0.442855	0.56562	0.468296	0.440145
-0.343224	0.0523732	-0.689065	-0.233668	0.0313004	0.027477									-0.292319	0.407956	-0.0958313	0.848415	-0.0381334	0.277553
-0.0335703	0.181288	-0.514646	-0.328924	0.497417	-0.118488									-0.422579	0.281914	0.119134	0.756593	0.343234	0.0680087
-0.0841385	0.0538355	-0.0165631	0.230059	0.00543806	0.242068									-0.535684	0.34746	0.0272919	0.421826	-0.051862	0.217706
-0.535923	0.121923	-0.0562176	0.00239628	0.464265	-0.317201									-0.610738	0.00492559	-0.189411	0.598244	0.469613	0.167178
0.00710634	-0.456876	0.26585	-0.388001	0.14741	0.233704									-0.0710372	0.518606	0.0431199	0.709798	0.392045	-0.410789
-0.628702	0.097429	-0.45233	-0.310978	0.0614408	-0.143512									-0.312729	0.132452	0.165242	0.579541	0.44799	0.256167
-0.319102	0.116833	0.270828	-0.329999	0.408124	-0.552495									-0.200162	-0.0277788	-0.521191	0.435612	0.362606	0.314897
0.14582	-0.523287	-0.355082	-0.209131	0.270932	0.153105									0.39896	0.332353	0.466754	0.559546	-0.0525614	0.340017
0.42407	0.295369	0.528104	0.222291	0.0278775	0.57093									0.344128	0.251549	0.406777	0.39416	0.326296	-0.025891
-0.492913	0.142152	0.0443064	-0.406308	0.475933	0.0568419									-0.276503	0.117955	0.0242308	0.0244826	0.250798	0.188756
-0.416612	-0.133241	-0.121648	-0.173607	0.211735	-0.40146									-0.53481	-0.00553123	-0.115528	0.0819258	0.274013	0.228984
-0.474299	0.0444021	-0.0350853	-0.85881	0.584316	-0.465606									-0.347913	0.182663	0.186442	0.438422	0.0519395	0.0815764
-0.144945	-0.00405318	-0.14299	-0.30927	0.495152	0.0582253									-0.298122	0.308342	0.120887	0.696076	0.439183	-0.104626
-0.158837	-0.385825	-0.0504003	0.25601	0.224625	0.301539									-0.296658	0.575897	-0.271111	0.402288	0.027425	0.343271
0.309905	-0.0342249	0.055177	-0.00456189	-0.0975387	0.351751									0.455518	0.123138	-0.286947	0.628036	0.691944	0.172543
-0.177475	0.0826706	0.225081	-0.449825	-0.000617501	0.2496									-0.185875	0.31512	0.401847	0.624887	0.217316	0.180579
-0.484116	-0.28721	-0.210119	0.55242	0.279991	0.250761									-0.300847	0.486409	-0.0484018	0.517608	0.0550799	0.106953
0.155966	-0.0202686	-0.0656472	-0.537125	0.257968	0.194695									-0.220885	0.320122	0.131853	0.518166	0.344256	0.164155
-0.341264	-0.330335	-0.261022	-0.417577	0.251579	0.280328									-0.0897813	0.0502876	0.469438	0.588749	0.8258	0.487044
-0.543127	0.088082	-0.244572	-0.333494	0.284948	0.188357									0.290786	0.248431	0.0414237	0.117248	0.399497	0.478646
-0.460661	0.0826721	-0.0856365	-0.0466424	0.309216	0.0330061									0.468503	-0.0236852	0.579623	0.67643	0.0427636	0.113872
-0.419888	-0.832775	-0.0936686	-0.328753	0.0147178	0.25054									0.0706115	0.593056	0.385845	0.649233	0.098188	0.264273
-0.087227	0.343972	-0.00795596	-0.285485	0.59697	-0.183744									-0.307644	0.170441	0.189831	0.147723	0.254629	0.513308
-0.6267	-0.262566	-0.188294	-0.213608	0.0628612	0.26864									-0.347756	0.328107	0.00281096	0.481182	0.566964	0.337153
-0.482204	0.388578	0.275202	0.0328179	0.495952	0.27485									-0.203876	0.380108	-0.296198	0.778926	0.449344	0.309274
-0.431948	0.132503	0.157223	-0.0241013	0.261171	0.446399									-0.110334	0.599301	0.319515	0.487897	0.00988167	0.2378
-0.455828	0.093299	-0.368948	-0.162186	0.291003	0.355972									-0.226468	0.306138	0.319787	0.532847	0.549685	0.170565
-0.0645062	-0.378075	-0.214667	-0.431788	0.361884	0.0459587									0.358265	0.238677	-0.319686	0.281198	0.22782	-0.103504
-0.319467	0.152609	0.258412	0.0208254	0.0557336	-0.0370898									0.0887189	0.37151	-0.496041	0.0280045	0.177709	0.0293303
-0.430872	-0.284036	-0.413236	0.0770898	0.277919	-0.130217									-0.212398	0.196572	-0.526515	0.657213	0.312928	-0.00102604
-0.429635	-0.242679	-0.395386	-0.358298	0.27546	-0.182072									0.510207	0.383956	-0.121389	-0.0512345	0.21472	0.288074
-0.0766281	-0.338904	-0.376939	-0.25372	0.00783829	0.284379									0.47437	0.228726	-0.439942	0.639713	0.0488989	0.239026
-0.503484	0.103817	-0.341758	-0.312539	0.159473	0.176113									-0.229787	0.056999	-0.26569	0.721842	0.2459	0.00615856
-0.613798	-0.335848	-0.302991	-0.296161	0.391477	0.258529									-0.085722	0.226085	-0.238975	0.520269	0.203414	0.0821202
-0.460335	0.123745	-0.191808	-0.287067	0.109177	0.288156									-0.0674248	0.116023	0.629841	0.454079	0.254101	0.312048
-0.279696	0.22978	-0.212736	0.0270931	0.132445	-0.128351									-0.420173	0.415311	-0.118974	0.641961	0.515806	-0.0941928
-0.666959	-0.512274	0.531634	-0.466266	0.0735206	0.26781									0.241752	0.312106	0.761542	0.376471	-0.0102261	0.237415
-0.508398	-0.000845954	-0.39632	-0.410991	0.481556	-0.0352424									-0.193549	0.441922	0.0549455	0.654804	0.016392	-0.0701491
-0.24273	0.036795	0.178284	-0.0985191	0.248987	-0.111463									0.255341	-0.285919	0.504636	0.576452	0.443829	-0.15856
-0.47939	-0.0180914	0.145372	0.0720583	-0.0644686	-0.0774205									-0.171816	0.238021	0.438612	0.811849	0.0643779	-0.375686
-0.340095	-0.339939	-0.331159	-0.159631	0.115574	0.314012									-0.070249	0.16312	-0.519389	0.472576	0.510485	0.0896503
-0.494272	-0.0982734	-0.186502	0.302009	0.266668	0.606526									-0.483721	0.407781	-0.419998	0.873467	0.212597	-0.227306
-0.00161965	-0.149418	-0.100177	-0.765996	-0.335393	0.41736									-0.298043	0.592266	0.168015	0.539649	-0.0253462	-0.070202
-0.293722	0.204073	-0.380193	-0.143276	0.26277	0.107414									-0.322755	0.634479	0.526083	0.592008	0.171553	-0.00496143
-0.291149	-0.115768	0.0555639	-0.0117402	0.472207	0.363057									-0.285896	-0.200932	0.609065	0.329779	-0.505091	0.245983
-0.39693	0.182477	-0.181576	0.213791	0.0173556	0.573675									-0.479499	0.530599	0.0175882	-0.212634	0.363895	0.472608
-0.234028	0.0628435	-0.0216173	0.347255	0.163607	0.488346									-0.156927	0.138813	-0.255774	0.824272	-0.0213142	0.307091
-0.136576	-0.112455	0.676934	-0.255206	0.290365	0.299646									-0.324764	0.275391	0.455052	0.423891	0.143675	0.43377
-0.171897	-0.236582	-0.0711933	-0.194304	0.349186	0.392505									0.229976	0.376426	-0.0419361	0.424615	0.170821	0.326877
-0.023064	-0.0965406	-0.262496	-0.279982	0.205183	0.0887907									0.203014	-0.0606302	0.063435	0.580547	0.295815	0.458395
-0.39763	-0.35874	0.0905482	0.18815	0.025377	0.322703									-0.106471	0.157429	0.421546	-0.00743696	0.495728	0.350948
-0.521236	-0.00801782	-0.121111	0.159609	0.208834	0.047993									0.402645	0.388495	-0.066834	0.726403	0.236222	0.49802
-0.366284	-0.509551	-0.464152	-0.474365	0.338	0.0973746									-0.399145	-0.0166165	-0.39046	0.616524	0.471409	0.450798
-0.593054	-0.361807	-0.289093	-0.414783	0.589722	0.452157									0.178449	0.468616	0.403914	0.418365	0.230135	0.0179968
-0.274394	-0.200588	-0.0793063	-0.294023	-0.0109967	0.284574									-0.112181	0.724957	0.143543	0.706566	0.464281	-0.00659761
-0.250378	-0.0412555	0.243692	-0.216129	0.320114	0.386789									-0.150281	0.336979	0.532174	0.525347	0.471422	-0.255769
0.0137222	0.322502	-0.552774	-0.114979	0.213393	0.326147									-0.0648655	0.551108	0.032966	0.543999	0.135666	-0.154324
-0.457279	-0.320579	0.291964	-0.38987	-0.00434791	0.194007									-0.477829	0.244249	-0.280251	-0.0178791	0.532588	0.181488
0.0566401	-0.40944	-0.535052	-0.055358	0.0415603	0.180076									-0.599602	0.0978218	0.536324	0.762281	0.430211	0.093433
-0.136944	-0.214358	-0.210155	-0.0613311	0.409154	0.49528									-0.0640172	-0.194954	-0.316881	0.768642	0.386133	0.103546
-0.658545	-0.703157	-0.311959	-0.32188	0.680814	0.44935									-0.272289	0.288441	0.223623	0.670304	0.20976	-0.0166842
-0.053755	-0.168312	0.10782	0.0126159	0.0728804	0.251848									-0.241431	0.555371	0.282863	0.740317	0.0104349	-0.0459897
0.106069	-0.230345	-0.394403	-0.421944	0.531697	0.327704									0.118524	0.0795219	0.480764	0.515172	0.312757	0.139946
-0.354739	-0.0309595	-0.819711	0.00528319	0.246551	0.291245									-0.460365	0.333442	0.422674	0.296963	-0.27344	0.0594352
-0.221384	-0.293327	0.193944	0.0568895	0.042763	0.399445									-0.180665	-0.121313	0.492192	0.290973	0.510625	0.0836551
-0.688729	-0.501908	-0.4662	-0.0425781	0.649054	0.319557									-0.293624	0.00180417	-0.225802	0.636301	0.348354	0.509498
-0.0372702	-0.0097869	-0.0120203	-0.348391	0.00225484	0.309246									0.276417	0.617278	0.0150256	0.445597	-0.0204501	-0.0172428
-0.0604033	0.406081	-0.320941	-0.0772128	0.0812399	0.559964									-0.305915	0.304987	0.282257	0.278864	0.098303	0.120236
-0.370335	0.122984	-0.311825	0.239328	0.3656	-0.362905									-0.324013	0.666836	0.622276	0.263088	0.0320559	0.460776
0.245946	-0.194639	-0.239369	-0.0925566	0.240783	-0.0340925									-0.345361	0.550905	0.472301	0.538511	-0.0249226	-0.0660487
0.141777	-0.312249	0.0521755	-0.0061047	0.404542	0.0703266									-0.121774	0.299139	-0.373585	0.106551	0.179837	-0.264393
0.0801984	0.12859	-0.0407885	-0.779086	0.392808	0.183589									-0.476426	0.360405	0.200743	0.228233	0.0883246	0.0515774
-0.413903	-0.115778	0.115984	-0.321616	0.346982	0.312796									-0.306404	0.652075	0.442405	0.395617	0.0308188	0.00331528
-0.260781	-0.370949	-0.464976	-0.411273	0.166496	0.436548									0.0934951	0.541358	0.192135	-0.00155435	0.0451689	0.15361
-0.667044	-0.330307	0.125266	-0.264927	0.642404	-0.00549619									-0.25329	0.0480078	0.329074	0.360121	0.224625	-0.0954253
-0.119874	-0.100836	-0.717315	0.0285311	0.135645	-0.324001									-0.32023	0.346319	0.0246418	0.720632	0.0637417	0.303892
-0.241975	-0.183762	-0.261489	-0.437274	0.0686521	0.357575									0.715426	0.539008	0.428534	0.710697	0.101739	0.327931
0.00261967	-0.0940795	-0.135505	-0.333551	0.128833	0.443543									-0.245131	-0.232656	0.0731316	0.506419	0.39926	0.377415
-0.319254	-0.311238	-0.669687	0.383637	0.673421	0.461857									0.265971	-0.339391	0.683655	0.487397	0.351013	0.301461
-0.179904	-0.210125	-0.185902	0.260632	0.117589	0.531059									-0.249102	0.66105	0.727524	-0.080228	0.24715	0.349699
0.0329029	-0.187951	0.348896	0.114775	0.0328481	0.377162									0.149641	-0.0200602	0.0414326	0.217015	0.466123	0.00920624
-0.451133	-0.327495	-0.38422	-0.169877	0.413375	0.531372									-0.0889326	0.516834	0.41585	0.547588	0.412318	0.472543
-0.671167	-0.281913	0.0707937	-0.168055	0.396708	-0.0360051									-0.246497	0.155422	-0.0609783	0.766885	0.367945	-0.000380147
-0.06073	0.333902	0.136141	-0.0786177	-0.230739	0.376234									0.408345	0.16633	0.620298	0.38808	0.357081	0.400436
-0.627605	-0.343237	-0.0601122	-0.301135	0.505563	-0.0134135									-0.142129	0.366271	-0.435001	0.767416	0.18084	-0.143054
-0.0002179	-0.419426	-0.252045	-0.231139	0.18243	0.57491									-0.324596	0.199182	0.43197	-0.0314364	0.149414	0.0681681
0.219329	-0.243833	-0.297387	-0.391834	0.0265168	0.564512									-0.257745	0.031935	0.279996	0.807945	0.450725	-0.187091
-0.0920099	0.0268232	-0.401397	0.0694208	0.321116	0.163689									-0.351436	0.108064	-0.136176	0.564957	0.420543	0.388705
-0.212567	-0.515224	-0.267416	-0.154834	0.455309	0.666854									-0.0716345	0.158234	0.423253	0.706187	0.711058	0.167311
-0.268978	-0.71139	-0.28476	0.0174227	0.300711	0.36516									-0.034153	0.436536	0.559495	0.561981	-0.00422776	-0.385512
-0.12101	0.063161	-0.22777	-0.212399	0.24034	0.670943									0.146615	0.367837	-0.114696	-0.0208745	0.527078	0.19019
-0.0063592	-0.669085	0.229231	-0.0838084	0.380678	0.611361									-0.303165	0.336431	-0.0970219	0.783261	0.497129	0.160849
-0.183612	-0.448801	-0.263308	0.0439883	-0.0189813	0.473596									-0.388325	-0.289159	0.492517	0.393483	0.390283	0.143075
-0.0530836	0.020216	0.134227	-0.292406	0.326234	0.299167									-0.085129	0.338605	0.430338	0.565239	0.205491	0.143623
-0.287602	-0.0373133	0.739762	-0.377742	0.481202	0.231374									-0.0502477	0.126778	0.300871	0.176541	0.0781142	0.131184
0.118153	0.16869	-0.278125	-0.373991	0.398607	0.534967									0.190615	0.171398	-0.143093	0.745011	0.307689	0.115613
-0.184734	-0.21486	-0.0392757	-0.28202	-0.100295	0.158685									0.269097	-0.33018	0.607162	0.724339	0.162382	-0.222877
-0.2185	-0.199392	-0.369807	-0.291638	0.569074	0.204649									0.330923	-0.0835273	0.346336	0.733397	0.487959	0.12497
-0.511381	-0.190773	0.157855	-0.4381	0.309885	-0.231849									-0.363584	0.399672	-0.228656	0.579381	0.221138	0.182965
-0.0112228	0.366959	0.0679063	0.0168536	0.443088	0.484736									-0.46109	0.14176	0.0463398	0.642393	0.632654	0.352984
-0.561151	0.106743	-0.515503	-0.321385	-0.0191347	0.238219									0.551464	0.255072	0.456051	0.693755	0.502675	0.136177
-0.467293	-0.249195	-0.498716	0.0417231	0.103195	0.326343									-0.432526	0.222534	0.52021	0.698065	0.58633	0.375365
-0.000988042	-0.0758177	-0.034467	0.0596978	0.126969	0.448001									-0.316366	0.132483	0.142182	0.645152	0.569861	0.398977
0.0597326	-0.318317	-0.208959	0.0938391	0.431583	0.125371									-0.110451	0.138056	0.329517	0.48036	0.308123	0.297521
-0.0495646	-0.0125339	0.428608	0.074098	0.387427	0.350669									-0.152073	0.494702	0.246477	0.455181	0.526867	-0.172736
-0.535111	-0.485616	-0.217554	-0.368289	0.105555	-0.0563257									-0.0799382	0.245532	-0.365636	0.407882	0.157697	0.00329616
0.379005	-0.270371	-0.293489	-0.138033	0.144801	0.106073									0.346878	0.577206	0.384423	-0.256133	0.488802	0.120696
0.52756	0.144365	-0.522088	0.0798212	0.102274	0.220712									0.58406	0.236523	0.483839	0.420801	0.257283	0.235597
-0.364345	-0.158104	-0.194959	-0.0882796	-0.0552675	0.456091									-0.383139	0.144917	-0.291512	0.395813	0.0504935	0.117172
-0.52228	-0.440528	-0.649635	0.0410019	0.428443	0.448593									-0.0015344	0.414145	-0.448238	0.376884	0.600239	0.408137
-0.177764	-0.270774	-0.619623	-0.193036	0.16865	-0.414214									-0.393415	0.322352	0.458852	0.605347	0.395837	0.0953931
-0.570237	0.0158519	-0.00458721	-0.66308	-0.118828	0.54019									-0.105242	0.0787185	0.360763	0.56204	0.544133	-0.0677905
-0.140339	-0.0550446	0.353078	-0.258278	0.023165	0.246775									-0.381861	0.614833	0.455696	0.377903	0.536197	0.00572492
-0.262678	-0.397473	0.338617	-0.254779	0.627243	0.345243									-0.329475	0.615938	-0.167142	0.109096	0.538546	0.0633158
-0.371978	-0.108465	-0.442191	-0.119157	0.0458501	-0.171929									-0.0681147	0.544963	0.148046	0.381027	0.602958	0.00464751
-0.0844464	-0.419772	0.612236	-0.159717	0.255831	0.419225									0.0289137	0.576238	-0.0118267	0.568909	0.492318	0.12241
-0.449735	0.196776	-0.0748765	-0.557166	0.444547	0.416042									-0.18636	0.161478	0.537749	0.822364	0.325031	0.249146
-0.316534	-0.0719433	-0.381932	-0.204349	0.099576	0.330077									-0.29712	-0.0148531	0.450011	0.696642	0.0588285	-0.0417208
-0.152779	-0.494479	-0.51463	0.147644	0.381619	-0.0781501									-0.213012	-0.117537	0.339519	0.200056	0.293165	-0.0383724
	-0.476361	0.139285	-0.193845	0.352432	0.416204									-0.158123	0.0948303	0.795983	0.159272	0.0422636	0.137151
	-0.31214	-0.867666	-0.129594	-0.0737155	0.098791									-0.172305	0.125071	0.150565	0.47815	0.376472	0.575538
	-0.138589	-0.662962	-0.0549151	0.410772	0.451542									-0.110772	0.661588	0.645524	0.650225	0.0353155	0.297217
	-0.181683	-0.0227243	-0.621527	0.779264	0.601579									0.231416	0.271518	0.340499	-0.00152139	0.243534	0.259791
	-0.255867	0.0206753	0.0873715	-0.0321792	-0.0285475									-0.0270066	0.308271	-0.103651	0.709373	0.478585	0.360585
	-0.120562	-0.826373	-0.277443	-0.0775828	0.484336									-0.0418137	0.210111	0.127042	0.212503	0.356751	0.333846
	-0.123535	0.60939	-0.136542	0.141199	0.278398									-0.214067	0.450947	0.215639	0.332439	0.502624	0.603834
	-0.155577	0.390377	0.0513314	-0.0130429	0.338939									0.390882	-0.0603985	-0.0574571	0.537988	0.171469	0.291812
	-0.623066	-0.845547	-0.362103	-0.0167348	0.105011									-0.177905	0.694927	0.561214	0.65729	0.187801	0.450411
	-0.392254	-0.501835	-0.213682	0.390109	-0.168214									-0.134311	0.241327	0.360572	0.397987	0.00865419	0.0133184
	-0.234728	-0.0735759	0.593271	0.040953	0.179584									-0.135402	0.307638	-0.0374922	0.131098	0.142552	0.199459
	-0.501477	-0.649667	-0.255603	0.371588	0.242246									-0.166317	0.430172	0.247132	0.454378	-0.0112353	0.189095
	-0.224977	0.504337	0.364189	-0.0582157	0.524605									-0.136302	0.486049	-0.0432134	0.580597	0.304252	-0.272414
	-0.0642278	0.279745	-0.251006	0.363108	0.202172									-0.404689	0.485337	0.68908	0.319441	-0.0333708	0.12145
	-0.47801	-0.491925	-0.442711	0.127462	0.102355									0.00542329	0.0100951	0.679981	0.629047	0.0152967	0.410491
	-0.405681	-0.504147	0.155077	0.348032	0.544214									-0.268946	0.307286	-0.290457	0.58684	0.733235	0.48797
	-0.558309	0.284139	-0.100623	0.378466	0.162299									-0.273448	0.386446	-0.223894	0.180553	0.504355	0.322556
	-0.307753	-0.310808	-0.545301	-0.0480652	0.0705943									-0.312419	0.678773	-0.31214	0.393044	0.155139	0.341679
	0.151957	-0.437265	-0.242975	-0.0777724	0.204661									-0.152704	0.632421	0.0195371	0.151497	0.116521	0.300045
	0.125632	0.0579038	-0.26714	0.233608	0.146993									-0.268755	0.139874	-0.247176	0.772433	0.595372	0.400163
	0.198579	-0.0177574	-0.333856	0.0648032	0.394624									-0.302631	0.402301	-0.327755	0.6106	0.278341	0.501423
	-0.434405	0.164697	-0.115314	0.63618	0.311313									-0.0801408	0.213369	-0.154804	0.597039	0.629035	0.561304
	-0.462355	0.0993215	0.0250563	0.534265	0.342783									-0.294179	0.32598	-0.172206	0.033944	0.262449	0.484079
	-0.142636	-0.533558	-0.226221	0.53557	0.440091									-0.23765	0.361129	-0.12522	0.505825	0.550814	0.224837
	-0.474124	-0.31271	-0.12969	0.442118	0.225616									-0.159909	0.32404	0.345585	0.44094	0.228274	0.0291433
	-0.369049	-0.178937	-0.204764	-0.00521421	-0.355181									-0.366706	0.455118	-0.0779583	0.440987	0.257127	0.468887
	-0.135215	-0.397271	-0.00964766	0.610906	0.0837888									0.511286	0.410048	0.0673608	0.165106	0.408185	0.0737734
	-0.331085	0.260506	-0.38268	0.292928	0.0823402									-0.324432	0.510324	0.153653	0.698091	-0.0275752	0.391495
	0.089802	0.0909318	-0.147921	0.441209	0.230014									0.0336201	0.541255	-0.183362	0.616029	0.483171	0.0413515
	-0.0474226	0.316907	-0.218055	0.375894	0.116336									-0.221926	0.427893	-0.107303	0.378359	0.31471	0.583497
	-0.0219057	-0.0547918	0.401577	0.498955	0.0216764									-0.260172	0.504857	0.246009	0.575665	0.37553	0.167503
	0.028637	-0.424358	-0.181694	-0.201006	0.173359									-0.224916	0.284937	-0.0162609	0.336253	0.0472639	0.345443
	-0.0775294	-0.109652	0.000122063	-0.0608739	0.299678									-0.219	0.307507	0.365341	0.430279	-0.0951803	0.205348
	-0.202983	0.297066	-0.0791593	-0.0471722	0.170283									-0.073637	0.460615	0.237082	0.0655518	-0.149447	0.687847
	-0.262792	0.535486	-0.386928	0.405501	0.259297									-0.291673	0.0813161	0.231932	0.696134	0.000814747	0.0694402
	-0.38514	-0.393423	0.0523083	0.0284944	0.28621									-0.143002	0.326006	-0.210864	0.366739	0.0228874	0.588497
	0.0816974	-0.642662	-0.250584	-0.0969937	0.414344									-0.334287	0.208388	0.334967	0.152736	0.254953	0.0696605
	0.0182033	-0.160974	-0.0156956	0.228257	0.20215									-0.293924	0.767067	0.39277	0.457767	0.319447	0.235652
	-0.235501	0.44366	-0.130066	0.268345	0.49054									-0.517308	0.504995	0.365281	0.553235	0.0917285	0.606573
	-0.149232	-0.0701245	0.202972	-0.287223	0.0317125									-0.25149	0.0907153	-0.0353891	0.757208	0.353262	0.471242
	-0.622393	-0.340936	-0.0609937	0.0884131	0.232222									-0.678404	0.253264	0.275003	0.694458	0.327216	0.276515
	-0.272573	-0.363629	-0.535739	0.318482	0.182119									-0.177613	0.400236	-0.20018	0.125909	0.777742	0.357723
	-0.360678	-0.0506678	0.0362072	-0.174723	-0.190536									-0.266963	0.524014	0.457646	0.737805	0.311979	0.061028
	-0.599122	0.156869	0.0612831	0.57205	0.357617									0.158802	0.49368	0.411062	0.593678	0.433087	-0.0717282
	-0.102259	0.471252	0.0788876	-0.0012859	0.312864									-0.26626	0.212593	-0.0473079	0.552095	0.52151	0.216963
	-0.523313	-0.524713	0.329765	0.153425	0.498074									-0.140061	0.821023	-0.271832	0.429499	0.10766	0.331807
	-0.0267461	0.0186633	0.341654	0.0135622	0.214835									0.52078	0.229995	-0.088398	0.288967	0.334561	0.402267
	-0.398395	-0.612851	-0.0164823	0.0411586	0.0140661									-0.0609526	0.694553	-0.243418	0.694276	0.524212	0.565965
	-0.604612	0.535397	-0.355024	0.466735	-0.139502									0.404212	0.42162	0.555302	0.525855	0.181533	0.247031
	0.0546911	-0.121916	-0.29462	0.282339	0.10256									0.326134	0.117772	0.173522	0.746475	0.070781	0.120497
	-0.547493	0.551089	0.00504144	-0.0657886	0.487709									0.537727	0.503772	-0.119536	0.529968	0.623739	0.0544869
	0.0364245	-0.402105	-0.0719801	0.0604494	0.0966133									-0.334217	0.41492	0.0698424	0.564318	0.0461267	0.168919
	0.0333056	-0.396124	0.0639613	0.0482489	0.167692									-0.445026	0.764566	-0.133473	0.111081	0.363199	0.238152
	-0.501629	-0.237772	-0.190529	0.092236	0.223014									0.27337	0.312136	0.168749	0.568963	0.357881	0.18013
	-0.433252	-0.627458	0.0479167	-0.134626	0.539836									-0.307984	0.283615	-0.0100559	0.137046	0.255203	-0.0244118
	0.272558	-0.451694	-0.354683	-0.186456	0.372111									-0.375524	0.42772	0.252989	0.503515	0.00799966	0.33636
	-0.0304292	0.229355	0.0400188	0.0553835	0.603092									0.0468572	0.196543	0.0544233	0.364932	0.00351379	0.43678
	-0.0203902	-0.0990058	-0.0215555	0.0384293	0.454286									-0.106064	0.7064	-0.0591634	0.29584	0.336594	0.00169818
	-0.281364	-0.385738	-0.387054	0.00314035	0.622701									-0.36586	0.46738	-0.0774172	0.699907	0.205155	-0.28736
	0.193234	0.117883	0.0579086	-0.0882614	0.49059									-0.400483	0.31362	-0.0232975	0.458683	0.23915	0.411988
	-0.400704	-0.33596	-0.613728	-0.176478	-0.0446338									-0.56323	0.453939	0.358461	0.615946	0.000870315	0.281112
	-0.370814	0.23745	-0.520649	-0.0567272	0.56985									-0.0504104	0.605884	0.15614	0.194075	0.606328	-0.159709
	-0.308794	-0.417869	-0.38651	-0.0640039	0.201851									-0.179001	0.555115	-0.0746893	0.479222	0.513943	0.30906
	-0.358844	-0.280512	0.390437	-0.101361	0.112867									-0.369126	0.312314	-0.0798114	0.0419449	-0.0838844	0.043512
	0.247382	-0.306551	-0.422384	0.0999145	0.333708									-0.0746367	0.0545512	-0.0373106	0.0305316	-0.025715	0.344704
	-0.0993981	-0.368895	-0.361833	0.454168	0.0598643									-0.27048	-0.127037	0.132202	0.640896	0.321947	0.334411
	0.0412489	-0.087379	-0.450728	0.43832	0.574572									-0.25887	0.0482119	0.297191	0.560294	0.234683	0.304344
	0.184906	-0.15586	-0.108975	0.139358	0.263988									-0.292554	0.182094	0.238793	0.64688	-0.109586	-0.136922
	-0.231545	-0.180128	-0.393966	0.760757	0.547442									-0.515935	0.696865	0.480934	0.0679209	0.224597	0.333329
	-0.18672	-0.127753	-0.628361	0.176738	0.176615									-0.353084	0.467913	0.44766	0.647679	0.23489	0.206143
	-0.00801963	-0.306454	-0.505311	-0.162488	0.431908									-0.337051	0.531206	0.0109009	0.666796	-0.0577492	0.158789
	-0.321021	0.497747	-0.00120908	-0.145693	0.514403									-0.288272	0.291951	0.26011	0.238209	0.0207272	-0.152685
	0.049341	-0.123805	-0.0427209	0.000311539	0.436897									-0.529885	0.310142	-0.196131	0.0418642	0.41578	0.111869
	-0.342993	-0.0334978	0.380275	0.537312	0.457998									-0.342078	0.162282	0.142948	0.0610238	0.366439	-0.24335
	-0.152821	0.804609	-0.348151	0.0395263	0.21704									0.0797013	0.799391	-0.116355	0.151135	0.262758	0.25479
	0.169531	-0.467493	0.0888142	-0.163892	0.353825									-0.275617	0.337362	0.146616	0.635603	0.0274787	0.251421
	0.0046175	-0.673933	-0.325255	0.148455	0.46076									-0.222681	0.587652	-0.195638	0.571319	-0.00297228	-0.177564
	-0.230283	-0.0561833	-0.0602507	0.323423	0.276822									-0.0177653	0.173096	0.190957	0.160469	0.065302	0.331
	0.118975	-0.289519	-0.234064	0.0230827	0.0296413									-0.0761918	0.0385663	0.403908	0.0974046	0.152801	0.59524
	-0.084057	-0.489774	-0.339511	0.10008	0.478787									0.399842	0.339318	-0.129764	0.0809614	0.0330562	0.0742166
	-0.0809339	0.610854	-0.0424731	0.0216189	0.687821									-0.343367	0.518178	0.0671252	-0.00463726	0.512946	0.285925
	-0.183442	0.491629	0.310666	-0.0353243	0.453653									-0.621366	0.0114953	0.172445	0.160974	0.460022	0.422331
	-0.495111	0.030347	-0.561356	0.0918303	0.12966									-0.127254	0.566826	-0.06144	0.361804	-0.146584	0.355284
	-0.281285	-0.613264	-0.336633	0.0171836	0.601075									-0.470964	0.590415	0.114979	0.514678	0.414508	0.390445
	0.357273	-0.167008	0.345076	-0.109691	0.82561									-0.267753	0.378112	0.3996	0.431788	0.402377	0.252649
	-0.261888	0.00027961	-0.453287	0.153061	0.248522									-0.208605	-0.241262	-0.104606	0.20823	0.525077	0.332955
	-0.524869	-0.286394	-0.262475	-0.0428118	0.247935									-0.197921	0.466106	0.0174895	0.135719	-0.0242929	0.104292
	-0.227237	-0.31235	-0.25225	0.318836	0.415639									0.16302	0.450191	0.660977	0.508371	0.544329	0.119241
	-0.295901	-0.0630883	-0.527762	0.412469	0.395454									-0.527277	0.538224	0.53324	0.262771	0.320457	0.143185
	-0.18471	-0.10707	-0.396991	0.0600182	0.417921									-0.214014	-0.247511	0.60588	0.0245823	-0.0241352	-0.115877
	0.00332228	0.231094	0.0392954	0.416579	0.127367									0.0411982	0.485905	-0.141858	0.333739	0.352348	-0.0524686
	0.0444269	-0.232281	-0.629409	0.0143415	0.151363									-0.0970417	-0.0395683	0.323768	0.634574	0.445439	0.468995
	-0.187828	-0.439678	-0.462076	-0.0468758	0.308871									0.288192	0.246828	0.55817	0.624774	0.101744	0.276822
	-0.446216	0.81826	-0.505811	0.361101	0.134036									-0.0281853	-0.102426	0.269729	0.307895	0.245828	-0.191653
	-0.240858	0.224462	0.245971	0.433466	0.442784									0.0926742	0.0988734	-0.630764	0.437155	-0.03537	0.106759
	-0.216903	-0.175857	-0.47285	0.605528	0.457425									-0.455787	0.286346	-0.000783392	0.460522	0.23175	0.202515
	-0.224502	-0.122423	0.07555	0.162712	0.093555									0.0540836	0.154204	-0.208603	0.239648	0.456854	0.0677835
	-0.258459	-0.118722	-0.193163	0.306863	0.403677									-0.420696	0.418727	-0.294766	0.434279	0.224863	-0.426251
	-0.0697687	0.0523953	-0.330125	0.318656	-0.000412214									-0.141265	0.363882	0.502915	0.762376	0.209789	0.128825
	-0.0499261	0.49252	-0.521049	0.00160953	0.650813									-0.0718303	0.0473926	0.479622	0.624807	0.104357	0.221432
	0.110668	-0.263895	0.467657	0.0513073	0.669396									-0.227684	0.123705	0.257223	0.470584	0.108491	-0.353097
	-0.511466	-0.35208	-0.120627	0.449836	0.0546349									-0.179165	0.186999	-0.535001	0.518426	0.429616	-0.24783
	-0.412572	-0.673033	-0.0971129	0.0130098	0.20123									-0.237546	0.441818	0.57281	0.430731	0.0802088	-0.118268
	-0.0375085	-0.765333	-0.0640829	0.441628	-0.0099943									-0.44154	0.0673556	0.309703	0.134495	0.131891	0.231219
	-0.175692	0.378369	0.0502236	0.597722	0.085125									-0.474215	0.162681	0.148975	0.18675	0.470424	0.477861
	-0.5416	0.227576	-0.0335368	0.234035	0.0669099									-0.285205	0.462893	-0.67019	0.608911	0.587306	0.41065
	-0.411816	-0.265589	-0.280307	0.160824	0.240056									-0.325822	0.111151	0.286326	0.798259	0.440456	-0.170806
	-0.0255373	0.0573807	-0.132664	0.426004	0.142475									-0.0703463	0.653319	0.0207767	0.452369	0.417216	0.110012
	-0.130897	-0.614801	-0.438977	0.303715	0.0645692									-0.463335	0.237469	0.786608	-0.122646	0.249926	0.00961992
	0.114689	0.00979437	0.491748	0.144981	0.37379									-0.240833	0.188919	0.268261	0.181598	0.18048	-0.0602659
	-0.385055	0.0346002	0.742194	0.402579	0.118438									-0.0796273	0.262073	0.449048	0.788604	0.355145	0.25548
	0.0277836	-0.60472	-0.503831	0.026894	0.100476									-0.160481	0.0166709	0.416662	-0.0509499	0.354946	-0.264566
	-0.385401	-0.0203031	-0.640959	-0.0348196	0.156138									-0.412019	0.829311	-0.571908	0.666824	0.374957	0.449076
	0.0575511	-0.319935	0.0039641	0.0362078	0.181949									-0.323395	-0.176792	0.612493	0.207868	0.374624	0.337427
	-0.263119	0.42956	-0.47838	0.53845	0.149208									-0.253839	0.3917	-0.488789	0.842331	0.387474	-0.237033
	-0.420791	0.0590631	-0.32489	0.34514	0.29604									-0.272533	0.730398	0.309621	0.702391	0.211829	-0.0018639
	-0.145493	0.204801	-0.737692	0.111879	0.437366									-0.23606	0.0728306	0.412431	0.59909	0.485176	0.426428
	-0.400137	-0.210226	-0.5573	0.0373623	0.0287201									-0.431323	0.610587	-0.110967	0.642857	0.0368576	0.10891
	0.0250572	0.0995478	-0.606211	-0.0427903	0.261784									-0.137384	0.55322	0.137739	0.71408	0.335792	0.114207
	-0.161916	0.00939075	-0.0163433	-0.0759397	0.0230052									0.351148	-0.045673	0.0515499	-0.0783804	0.288328	0.12023
	-0.334672	-0.640036	-0.334677	0.15121	0.34775									-0.410239	0.749908	0.245589	0.691707	0.41157	0.485627
	-0.366947	-0.0549202	-0.17491	0.0506048	0.212662									-0.0713068	0.161468	-0.220916	0.191358	0.467226	-0.296204
	0.0454528	0.0261205	-0.0355923	-0.0275542	-0.0146757									-0.0526041	-0.0763947	-0.0818039	0.36879	0.0230015	0.574271
	-0.518795	-0.109451	0.0198184	-0.106106	0.520225									-0.0438089	0.549695	-0.220392	0.742587	0.069999	0.18153
	-0.349806	-0.591328	-0.0123881	-0.0165569	0.220266									0.372533	-0.115487	-0.592244	0.679647	0.65218	0.257029
	0.000358827	0.485374	-0.538584	0.0513382	0.0431262									-0.241617	0.704753	-0.244649	0.483441	0.515581	-0.317696
	-0.342631	-0.105686	-0.116016	0.136602	-0.105655									-0.081032	-0.250092	0.371834	0.604555	0.569922	-0.0531069
	-0.0931996	-0.446852	0.192676	0.174189	0.204579									-0.22815	0.280488	0.288553	0.804741	0.681393	0.111004
	-0.117984	-0.414826	-0.402651	0.0309388	0.227893									0.0741736	0.208514	-0.278656	0.637228	0.0039832	0.367303
	-0.296949	0.766388	0.466942	-0.0376827	-0.122025									-0.304347	0.639684	-0.0545468	-0.301809	0.528621	0.390479
	-0.285149	0.614306	0.243884	0.0282976	-0.276826									-0.370114	0.327801	0.120687	0.644865	0.391521	0.0306997
	0.0258722	0.557135	-0.399158	0.197468	0.408358									-0.10883	0.168917	0.549969	0.746581	0.384706	0.23758
	0.126385	0.423565	-0.328122	0.0131214	0.163525									-0.338003	0.226938	0.00656507	0.729774	0.360116	0.321025
	-0.340217	-0.292364	0.00643979	0.165578	0.421396									-0.15424	0.49298	0.444517	0.331111	-0.023451	0.0677754
	0.211749	-0.511995	-0.193703	0.093739	0.447901									-0.122659	0.303419	-0.0519492	0.186375	0.397561	0.240284
	-0.341557	-0.0200467	-0.364253	0.0703471	0.563258									-0.211602	0.133956	0.647628	0.63263	0.474863	0.00718356
	-0.037293	-0.367749	0.0284479	0.137023	0.32275									-0.533537	0.457356	0.0717815	0.571682	0.52513	0.162752
	-0.389054	-0.376088	-0.387737	0.0442954	0.255405									-0.39254	0.273476	-0.270411	0.694584	0.390539	0.135716
	-0.715212	0.372535	0.321668	0.706957	0.160967									0.101395	0.658624	0.0787114	0.35034	0.100967	0.208841
	0.228777	0.0332597	0.337533	0.505133	0.286087									0.453391	0.735005	-0.217003	0.827551	0.152426	0.0429411
	-0.359423	-0.563728	-0.127982	0.0329834	0.310807									-0.476566	0.395117	0.0436294	0.581938	0.4199	-0.109867
	-0.302882	0.00810962	-0.257687	-0.105662	0.479278									-0.321802	0.430475	0.11295	0.626806	-0.00623945	-0.00993205
	-0.538424	0.212995	-0.321226	0.141699	0.423859									-0.354471	0.671242	-0.400537	0.717488	0.280539	0.180097
	-0.119564	-0.266641	-0.209104	0.00326769	0.681369									-0.124526	0.354374	0.0410795	-0.141726	0.440751	0.152534
	-0.408453	0.0249184	0.346404	-0.137375	0.18699									0.0461097	0.424114	0.509186	0.653715	0.421693	0.389663
	0.248225	0.11683	-0.24819	0.0426173	-0.0681623									0.00170957	0.216009	-0.0518764	0.544425	0.497094	0.129746
	-0.139388	-0.628383	-0.268867	0.0730235	0.604234									-0.257987	0.502782	0.35546	0.553677	0.0213052	0.190452
	-0.198784	-0.33312	-0.219091	0.674837	0.219983									0.124808	0.345001	0.420187	0.574951	0.112853	0.355551
	-0.520475	-0.30172	-0.162174	0.675906	0.0736238									0.203898	0.151267	-0.239651	0.480333	0.449243	0.160493
	-0.0305909	0.313761	-0.176033	0.563958	0.586944									0.738713	0.422623	-0.208895	0.644885	0.0127673	0.111269
	-0.34095	-0.0312496	-0.663178	0.326373	0.398084									0.300105	0.0630615	0.185929	0.605362	0.0637958	0.205041
	-0.375679	-0.391888	-0.231724	0.509594	0.0620008									-0.0931169	0.267749	0.063917	0.71749	0.268502	-0.184145
	0.0692869	-0.183244	-0.234527	0.134321	0.386867									-0.258592	0.562477	0.0387351	0.137822	0.169358	0.244625
	-0.340822	-0.456369	-0.340089	0.50178	0.337136									-0.304827	0.507305	-0.503408	0.465577	-0.11408	0.20954
	-0.318688	0.0739938	-0.427665	0.499479	0.0582171									-0.48777	0.490788	0.321201	0.706625	0.318335	-0.178513
	-0.0149611	-0.256016	-0.516566	0.439183	0.570514									-0.148117	0.104309	-0.11667	0.492354	0.140253	0.0298465
	0.00754553	-0.183948	-0.297323	-0.135533	0.36246									-0.262132	0.458072	0.548125	0.668081	0.0532732	0.648482
	-0.509431	0.387839	0.115178	0.110684	0.159223									-0.534381	0.586676	0.630836	0.703247	0.036448	-0.393896
	-0.252363	0.225981	-0.617482	0.030625	0.0706597									-0.636832	0.164299	0.451622	0.42026	0.311985	0.283017
	-0.390722	-0.158095	-0.22653	0.086753	0.0210263									-0.382231	0.0619082	-0.126589	0.592142	0.147672	0.512033
	0.183803	0.1481	-0.314026	0.486761	-0.050557									-0.586661	0.565506	0.702886	0.426711	0.494609	-0.106827
	-0.0916039	-0.0128004	-0.44867	0.0736788	0.364738									-0.0547774	0.399094	0.102382	0.626043	0.174064	0.419765
	-0.0812408	-0.116518	-0.345567	0.461455	0.370599									0.567632	0.545389	0.341445	0.573684	0.193166	-0.0606928
	-0.548596	-0.0846552	-0.0421416	0.396258	0.476655									-0.40765	0.622466	0.396124	-0.00312632	0.270597	0.237734
	-0.10414	-0.0429201	-0.392728	0.23337	0.488594									-0.484019	0.517244	0.0487439	0.804055	0.292202	0.5116
	0.0303455	0.1681	-0.633986	0.21305	0.246429									-0.430314	0.631303	0.929321	0.530389	0.297519	0.325109
	-0.0618978	-0.16772	-0.784844	0.33815	0.498615									-0.111796	0.735944	-0.245247	0.800279	0.367165	0.32908
	-0.355268	0.0210649	0.202363	0.0977234	0.0454716									-0.0107652	0.691944	-0.208207	0.597177	0.011066	0.457516
	-0.206263	-0.0302736	-0.539749	0.113371	0.414961									-0.196555	0.658613	0.0723969	0.685314	0.221759	0.184765
	-0.40857	0.413396	-0.385552	0.102725	0.252863									0.286593	0.111742	0.472796	-0.266648	0.345216	-0.0487876
	-0.406374	-0.199236	-0.351051	0.0605367	0.363728									-0.534556	0.400907	-0.122146	0.498256	0.123624	0.196798
	-0.196527	0.196029	-0.284766	0.474549	0.238585									0.219357	0.326004	0.450312	0.653235	0.0219612	0.276893
	0.0632063	-0.425697	-0.131471	0.50652	0.0304476									-0.139992	0.759959	-0.109103	0.796376	0.439828	0.295568
	-0.220495	-0.161643	-0.273144	-0.125913	-0.2008									0.311141	0.234795	-0.384162	0.440121	0.118302	-0.0757622
	-0.149599	0.0102398	-0.181048	0.583005	0.0495758									-0.434855	0.331538	-0.018106	0.531417	0.109652	0.36656
	-0.242587	-0.311565	-0.242374	0.0137411	0.448007									-0.486592	0.462603	0.404779	0.20407	0.112168	-0.233557
	-0.0478146	0.246799	-0.411486	0.361252	0.0570211									0.650589	0.191263	0.449128	0.383168	0.453285	0.200582
	-0.2866	-0.391111	-0.170562	0.240635	0.264639									-0.394461	0.38243	0.28484	0.1753	0.00798085	0.0935667
	0.0318292	0.0359094	0.135696	-0.0591347	0.580141									-0.282035	0.486289	0.575985	0.497811	0.0112103	-0.034323
	-0.449868	-0.233129	-0.293064	0.300179	0.204626									-0.0949918	0.396633	0.323025	0.27945	0.22611	0.173477
	-0.200408	0.321851	-0.359292	0.320851	0.00513624									-0.17165	0.197713	-0.114271	0.697348	0.323619	0.39472
	-0.0557836	-0.0512429	-0.282932	0.358587	0.28312									-0.256019	0.352613	-0.227959	0.481703	0.368233	0.140116
	-0.529083	0.586953	0.072226	-0.013905	0.0312817									-0.279982	0.857708	0.208684	0.545787	0.1564	-0.0897063
	-0.349139	-0.437305	-0.645794	0.397411	0.480668									0.053995	0.556196	-0.0307673	0.40914	0.253661	0.010615
	-0.500662	0.0785884	-0.140345	0.490068	0.467802									-0.0671057	-0.00109045	0.0938203	0.00585828	0.112772	0.356804
	-0.362906	-0.0737011	-0.189441	0.601557	-0.0868041									-0.228742	0.216148	-0.105136	0.334014	0.0316645	-0.109344
	0.465184	-0.00572038	0.00452295	0.0662207	0.127545									0.0226021	0.614508	0.135163	0.582676	0.201477	0.14649
	-0.480995	-0.104283	-0.331351	0.0299413	0.0348291									-0.364768	0.0639302	-0.00330318	0.758543	0.244064	0.0111872
	-0.24325	-0.180995	-0.152432	0.49454	0.0852807									-0.456061	0.48246	-0.124024	0.744998	0.168214	-0.132171
	0.129102	-0.308595	-0.696642	0.531219	0.276468									0.242833	0.0626817	0.0779586	0.594495	0.21695	0.0058831
	0.187982	-0.152334	0.162639	0.484668	0.0771659									0.623004	0.357117	0.26974	0.402533	0.31707	0.197144
	-0.17306	0.711482	-0.11009	0.300781	0.10251									0.0774966	0.79284	-0.179326	0.238729	0.282605	0.275724
	-0.570065	-0.623551	-0.00798448	-0.135212	0.0068487									-0.321279	0.70965	0.203887	0.724647	0.0253391	0.0492907
	-0.0270944	0.182362	0.443995	0.0133476	-0.0105017									-0.27743	-0.154073	-0.127898	0.150737	0.13492	0.357382
	-0.414353	-0.106802	0.394351	0.640096	0.16297									-0.521936	0.410703	0.0480039	0.699936	0.305196	0.309492
	-0.0857207	-0.00845557	-0.210163	0.313265	0.0771798									-0.606994	0.562078	-0.329099	0.5765	0.460635	0.456739
	0.447338	-0.484867	-0.517234	0.471428	0.347317									-0.0937098	0.648162	-0.256594	-0.0138879	0.313265	0.349579
	-0.233098	0.0587055	-0.0576444	-0.0542963	0.489115									0.000205702	0.60481	0.534973	0.624345	0.483959	0.0367327
	-0.65822	0.0103213	0.0417016	0.277419	0.095754									0.226967	0.344937	0.593299	0.360694	0.173182	-0.0554863
	-0.222368	-0.396004	-0.163905	0.4346	-0.0572388									-0.0798411	0.580378	0.138365	0.518962	0.434961	0.257577
	-0.544287	-0.119461	-0.427468	0.407145	0.0796407									-0.392696	0.495337	0.074239	0.105368	0.365367	0.440676
	-0.529611	-0.348879	-0.0620525	0.0586623	0.50645									-0.287958	0.511669	0.316922	0.725735	0.396518	0.148995
	-0.292151	-0.206454	-0.545269	0.447814	0.421818									-0.465859	0.305709	-0.395575	0.249256	0.172637	0.198735
	-0.150518	0.644104	-0.600003	-9.08017e-05	0.433252									0.103108	0.397053	0.460801	-0.00131296	0.310203	0.496582
	-0.415901	-0.123225	-0.742592	0.373785	0.372183									-0.130921	0.0559529	0.513096	0.242264	0.301792	-0.0392378
	-0.074352	0.0120203	-0.322061	0.587846	0.443388									-0.266702	0.105558	0.029563	-0.169676	0.440531	0.2683
	-0.438382	0.082663	-0.498499	0.0629857	0.569942									-0.169096	0.366572	-0.267112	0.402387	0.354662	0.218691
	-0.475276	0.278517	-0.0530695	0.0509945	0.449236									-0.0509018	0.542078	-0.102881	0.265979	0.39476	-0.161758
	-0.538043	0.206022	0.0270477	0.0446608	0.173892									-0.134143	0.000504474	0.493625	0.55701	0.106005	0.0577794
	-0.0120712	-0.302467	-0.233846	0.240918	0.354364									-0.13432	0.235441	0.188974	0.186939	0.208099	0.358108
	-0.3026	0.131904	-0.517847	0.271125	0.133772									-0.243191	-0.0306638	0.023238	0.11868	0.558521	0.464521
	0.0989374	0.0921642	0.0172391	-0.00634887	0.424272									-0.171642	0.48271	0.263111	0.50738	0.42875	0.469512
	-0.269236	-0.241002	-0.140322	0.737475	0.221641									-0.492724	-0.162293	0.0888399	0.469231	-0.0980993	0.456937
	-0.150964	-0.160095	-0.139605	0.593814	0.229174									0.331136	0.240566	-0.0504484	0.541226	0.629686	0.324806
	-0.378042	-0.0178501	-0.431473	0.099507	0.760397									-0.249457	0.370791	-0.416377	0.183394	0.105681	0.0923818
	-0.140215	0.174256	-0.354736	0.267586	0.0975439									-0.309361	0.1632	-0.241824	0.565069	0.727281	0.24161
	-0.674594	-0.0830882	-0.41669	0.439962	0.480691									-0.213105	-0.262321	-0.000129456	0.280106	0.391548	-0.515639
	0.0781892	-0.376188	-0.321696	0.480816	0.237827									-0.548116	0.429914	-0.284501	0.467142	0.167297	0.506559
	-0.217817	-0.161325	-0.0306739	0.0722189	0.454612									-0.326464	0.142416	-0.275585	0.364774	0.395895	0.438693
	-0.32971	-0.292393	-0.106233	0.0543199	0.0211251									-0.383247	0.479402	-0.607935	0.706022	0.306371	0.314227
	-0.455948	-0.0171205	-0.114517	-0.303857	0.143938									-0.683088	0.240339	0.681949	0.451338	0.418865	0.073283
	-0.329405	-0.265125	-0.0426581	0.412279	0.400959									-0.0967881	0.440639	-0.171913	0.754279	0.488883	0.0423158
	-0.152827	-0.514345	0.154697	0.201772	0.575793									0.284865	-0.00785147	-0.375997	0.586402	0.210235	0.644261
	-0.176133	-0.376744	-0.188506	0.388342	-0.0528073									0.0923853	0.398801	0.645057	0.772938	0.425484	0.567724
	-0.143285	0.303447	-0.121394	0.408932	0.0417622									-0.501288	0.138895	0.118891	0.437661	0.317615	0.0383683
	-0.37899	-0.110134	-0.200919	0.18931	0.0424796									-0.341616	0.462409	0.168019	0.510931	0.423677	0.389281
	-0.0589131	-0.0544362	-0.124897	0.302394	0.337133									-0.115547	0.250302	0.199105	0.906381	0.355451	0.518135
	-0.0747164	-0.0298683	-0.452101	0.3411	-0.269388									0.0604008	0.623113	0.0488277	0.192623	0.376356	0.0558721
	-0.17862	-0.0907472	-0.262208	0.306482	0.575749									-0.213393	0.149627	-0.470806	0.457628	0.304674	0.548385
	-0.275312	-0.198654	0.472025	0.170771	-0.133265									-0.279169	0.560835	0.0724674	0.586021	0.171282	0.327078
	-0.130844	-0.284955	-0.249567	0.00220949	0.373311									-0.148195	0.439931	0.244976	0.0364416	0.257993	0.252864
	-0.565872	-0.133496	0.022023	0.405381	-0.045731									0.17352	0.480253	-0.567367	0.571591	0.201523	0.331397
	-0.24133	-0.148685	0.187095	0.265267	-0.0864546									-0.2428	0.380849	-0.484362	0.490498	0.145505	-0.0148982
	-0.273802	-0.0169149	-0.294336	0.480258	0.250716									-0.212707	0.271723	-0.0612965	0.574734	0.472509	0.277152
	-0.276713	-0.0640082	-0.260311	0.0384492	0.361752									-0.0635353	0.382893	-0.192154	0.668506	0.107129	0.227084
	-0.522735	-0.198502	-0.612491	-0.253325	0.144177									-0.185415	0.41892	-0.130128	-0.0752678	0.418385	0.00979484
	-0.0564673	0.0404143	-0.439179	-0.00573724	0.346912									-0.234627	0.18967	0.187156	0.40235	0.0876434	0.0430393
	0.00815624	-0.150705	-0.564006	0.302235	-0.0569822									-0.265711	-0.218903	0.269376	-0.000654132	-0.0109533	0.0890412
	-0.216502	0.158452	-0.00477287	0.241653	0.307993									-0.38477	0.373978	0.51586	0.707462	0.43976	0.254251
	0.63421	0.011883	-0.343145	0.0772466	0.560041									0.055039	0.631203	-0.128619	0.479925	0.238377	0.270819
	-0.125721	-0.431492	-0.377681	0.226932	0.425176									-0.13116	0.629422	-0.346536	0.46472	0.280425	0.303945
	-0.324301	-0.10655	-0.371442	0.246605	0.28693									0.00272448	0.427708	0.152282	0.577089	-0.0287069	0.555552
	0.00917469	-0.0896475	0.039801	-0.12053	0.00815789									-0.023558	0.194985	0.222784	0.394912	0.209753	0.186148
	-0.675407	-0.235732	-0.423353	-0.370304	0.646806									-0.175828	0.508884	-0.043171	0.497612	0.122968	0.481944
	-0.439246	-0.528627	0.239636	0.370639	0.315861									-0.371936	0.26036	0.316499	0.231942	0.0374658	-0.364292
	-0.10747	-0.761483	-0.213597	0.31122	0.119784									-0.252311	0.347359	-0.103568	0.574967	0.06127	0.487042
	-0.22857	-0.71135	-0.50805	0.283851	0.507898									-0.162669	0.565919	-0.14764	0.013652	0.346045	0.430697
	-0.0225126	-0.25919	0.0770379	0.108772	-0.137696									-0.00745383	0.448792	-0.0730158	0.470249	0.35055	0.353247
	-0.50847	0.109173	-0.244387	0.0622285	0.445156									-0.352278	0.403193	-0.120199	0.585483	0.0306714	0.321339
	-0.134987	0.0218757	-0.116319	0.569725	0.165065									-0.340772	0.192231	-0.157674	0.653035	0.574476	0.0503698
	-0.0363317	-0.099464	-0.204951	0.117545	0.328832									0.465939	0.181945	-0.0045917	0.438117	0.181363	0.0073817
	-0.174521	0.107324	-0.463934	0.338459	-0.0422403									-0.116454	-0.46869	0.441834	0.598705	0.148454	0.0244462
	-0.343796	0.189468	-0.473682	0.0447266	0.264963									-0.244765	0.414921	0.448828	0.709251	0.412975	0.13602
	-0.152593	-0.260582	-0.38949	0.267913	-0.0345258									-0.018116	0.473247	-0.163371	0.765305	0.165381	0.178445
	-0.344136	-0.81843	-0.420173	0.541763	0.405512									-0.298247	0.403045	-0.240924	0.339282	0.349525	-0.122503
	-0.0467197	-0.110792	-0.521263	0.495272	0.0199285									0.00276823	-0.11669	-0.194609	0.493822	0.223557	0.153561
	-0.162819	-0.0371421	-0.488496	-0.0189614	0.374481									-0.228984	0.692269	-0.142718	0.366535	0.101779	0.217575
	-0.44607	0.259272	-0.409358	0.465405	0.413649									-0.338435	0.179494	-0.111459	0.727962	0.12849	0.358062
	0.103577	-0.0792261	-0.163181	0.146601	-0.161361									-0.164997	0.348665	-0.210952	0.490466	0.178709	0.0638833
	-0.721435	-0.159403	-0.298584	0.00846746	0.140253									0.293603	0.319217	-0.132202	0.368433	0.117633	0.466546
	0.106142	-0.126262	-0.434785	0.00215121	-0.305572									-0.357801	0.447433	-0.0928448	0.631396	0.296882	0.0432685
	-0.475334	-0.493263	-0.634193	-0.059764	0.137231									0.0318169	0.00298448	-0.176178	0.0648061	-0.00524214	0.453084
	-0.35848	-0.00233394	-0.356889	0.200328	0.424891									-0.371484	0.290637	-0.063569	0.677465	0.321262	0.412975
	-0.441697	-0.208735	-0.135632	0.082819	0.428668									-0.0605328	0.0308831	0.629019	0.305651	0.359158	0.0444277
	-0.101653	0.0705822	-0.314035	-0.0702367	0.34942									-0.258155	0.58939	0.41566	0.308407	0.600325	0.453026
	-0.175429	-0.147266	-0.304666	0.246833	0.236559									-0.00591372	0.524342	-0.0225808	0.62703	0.61685	-0.195883
	0.0507904	-0.0936453	-0.388763	-0.0865834	0.0518974									0.144164	0.603692	0.133879	0.237504	0.532763	0.354483
	-0.820518	0.159879	-0.283913	0.148707	0.0354984									-0.38963	0.299111	0.33312	-0.0795845	0.16512	-0.109802
	-0.510734	-0.0816236	-0.493035	0.167746	0.449312									-0.112784	0.344248	0.558268	0.721374	0.464479	-0.197551
	-0.615499	0.00525841	-0.438879	0.376463	-0.00805256									0.0576816	-0.14309	-0.108051	0.362089	0.55398	0.209532
	-0.0249264	-0.192557	-0.310693	0.39603	0.3021									0.0522269	0.0938509	0.0011147	-0.00698869	0.120949	-0.0330039
	-0.0759871	-0.217781	-0.582812	0.456565	0.201513									-0.169059	0.485706	-0.282358	0.423774	0.106087	0.187587
	-0.814753	-0.0633861	-0.513768	0.284462	0.00565139									0.0510605	0.375885	-0.26556	-0.092743	0.419787	0.0986463
	-0.126885	-0.364151	-0.0823639	0.00769644	-0.129629									0.0196928	0.131357	-0.0499669	0.537626	0.128152	0.28264
	-0.634322	-0.0224701	-0.239962	0.702613	0.246533									-0.105825	0.325121	0.266581	0.423958	0.23559	0.55743
	-0.689837	-0.145579	-0.395598	0.389757	0.0522139									-0.102422	0.515744	-0.178036	0.642466	0.0338851	0.237388
	-0.438107	-0.214099	-0.00330985	0.533418	0.095585									-0.245316	0.107863	-0.111365	0.780817	0.294175	0.213599
	-0.0978838	-0.483831	-0.361016	0.0248885	0.0397013									0.419291	0.0611482	0.122502	0.626681	0.0938988	0.109829
	-0.664821	-0.367205	-0.337291	0.117724	0.215211									-0.167339	0.240444	-0.12218	0.77116	0.169772	0.206261
	-0.40407	-0.0247267	-0.264144	0.261974	0.132548									0.0536954	0.242347	0.385463	0.232521	0.335692	0.38039
	-0.720757	-0.383633	-0.318445	0.626662	0.173022									0.30525	0.568065	0.00704883	0.4997	0.146122	0.0270752
	-0.712209	-0.0560389	-0.303967	-0.0839765	0.117435									0.030998	0.384719	-0.111437	0.0611103	0.346527	-0.0279993
	0.141829	-0.356922	-0.192017	-0.0917243	-0.000794399									-0.11324	0.375257	0.0490512	0.04532	-0.128337	0.30238
	0.40782	0.197898	-0.623276	0.227234	0.295914									-0.0638361	0.513312	-0.0515603	0.152433	0.483328	0.0439852
	-0.401868	-0.276605	-0.315002	0.199377	0.533326									-0.344289	0.522184	0.184248	0.758343	0.356005	0.0850238
	-0.0789086	-0.0695811	-0.707072	-0.0994783	0.281834									-0.160891	0.0923787	-0.168295	0.486272	-0.0539654	-0.165993
	-0.253954	0.173178	-0.0787831	0.33989	0.121117									-0.213243	0.415259	-0.0690163	0.712808	0.404077	0.173499
	-0.485865	-0.374874	-0.165059	0.180475	0.00522236									0.46673	0.246783	-0.472895	0.44706	0.124378	0.321167
	-0.0190314	0.214404	0.117668	0.348347	0.111276									-0.127479	0.0634203	-0.468645	0.330995	0.364388	0.414955
	-0.456733	-0.383703	-0.610871	0.38029	0.0344786									0.425005	-0.139809	-0.112657	-0.0722418	0.412548	0.12005
	-0.174702	0.130991	-0.316242	0.0555721	0.0088779									0.42603	0.402355	-0.0213241	0.445552	-0.00495103	0.579892
	-0.404026	-0.385063	-0.323003	0.140978	0.085377									0.0105545	0.415963	0.111166	0.752238	0.265735	0.743859
	-0.362255	0.522316	-0.549454	0.525746	0.587073									0.360481	0.381544	0.481616	0.361503	0.155136	0.422964
	-0.523412	-0.138342	-0.173238	0.408482	0.358326									-0.597279	0.190006	0.00786992	0.44431	0.179789	0.649106
	-0.401989	-0.186912	-0.452513	-0.0638058	-0.169157									0.241795	-0.0195732	-0.0635581	0.571002	0.552425	-0.144929
	-0.588974	-0.0751682	-0.150533	0.0287547	-0.0592275									-0.317843	0.233649	-0.328124	-0.4267	0.554107	0.104771
	-0.164406	-0.354665	0.136789	0.24199	0.148282									-0.251299	0.228456	-0.234763	0.440304	0.467397	0.186262
	-0.401091	-0.284836	-0.0962392	0.408647	0.521662									-0.40267	0.172525	-0.439058	0.110158	-0.051789	0.139218
	-0.28526	-0.0334032	-0.322527	0.452332	0.324099									0.249919	-0.0638009	0.276098	0.504512	0.15099	0.350397
	-0.267615	0.136949	-0.191825	0.474014	0.25986									0.12073	-0.0843376	0.380483	0.116924	0.293227	0.0969781
	-0.614462	-0.210752	-0.354574	0.196433	-0.139309									0.340927	0.209348	0.218627	0.503049	0.0336403	0.291819
	-0.203796	-0.25714	0.0928701	0.0998287	0.440515									0.175386	0.197855	-0.00744234	0.0290656	0.23357	0.269445
	-0.394213	0.0635571	-0.550206	0.502694	0.321931									-0.403999	0.642519	-0.253663	0.273226	-0.058509	0.0250472
	-0.347754	-0.53321	-0.167788	0.163849	-0.175192									-0.532321	0.423343	-0.367413	0.397662	0.0970488	-0.00626376
	0.0485437	-0.483842	-0.0727271	-0.0656843	0.441478									0.0244205	0.24471	-0.156941	0.31998	-0.0478501	-0.285875
	-0.12734	-0.364016	-0.453326	0.10818	0.554763									0.0280561	-0.0751012	0.440592	0.302893	0.0925529	0.258856
	-0.508499	0.512751	-0.182561	0.124362	0.507019									-0.37999	-0.237002	0.296432	0.320172	0.120685	0.0878339
	-0.213081	0.704079	0.1325	0.499906	-0.164934									-0.431223	0.402093	-0.0647409	0.560074	0.559609	-0.164475
	-0.551738	-0.0111546	-0.39641	0.588898	-0.146511									-0.447863	-0.113832	0.117887	0.74182	0.244834	-0.169863
	-0.637202	-0.0777948	-0.184977	0.293893	-0.0325313									-0.17542	0.382419	0.485719	0.439403	-0.113855	-0.0546337
	-0.0311158	0.0793513	-0.293612	0.465488	0.723455									-0.0870593	-0.0109481	-0.204366	-0.0784931	0.129529	0.140393
	-0.522844	-0.152946	0.010246	0.397129	-0.467891									-0.188482	0.307328	0.292437	0.314258	-0.0157882	-0.127295
	-0.107357	-0.554354	-0.181533	0.241889	0.176625									-0.0484985	0.102915	0.115653	0.472157	0.0979794	0.202449
	-0.459116	-0.0986598	-0.598501	0.256041	0.00105918									-0.320572	0.457802	-0.40505	0.324208	0.334074	0.325538
	-0.596191	0.030274	0.397766	0.368781	0.327212									-0.0410193	0.260906	0.617987	0.418817	0.324961	0.350538
	-0.186029	0.105183	-0.195298	0.13427	0.260948									0.0357122	0.00803104	0.0229486	0.406461	0.85399	0.273952
	-0.2631	-0.292345	-0.513887	0.329947	0.0542072									0.388358	0.0472198	-0.00313664	0.191709	0.267842	0.0189704
	-0.441778	-0.152288	0.507589	0.449765	-0.330597									-0.237724	-0.0118604	0.457371	0.189438	0.115546	0.0309706
	-0.683648	-0.181914	-0.465276	0.189055	0.46126									-0.305548	0.0351687	0.00256025	0.576508	0.292307	0.209365
	-0.494979	-0.160843	-0.0592913	0.467153	-0.0325433									-0.145802	0.145917	-0.0822997	0.415452	-0.0226092	0.037226
	-0.70319	0.124543	-0.345826	0.344777	0.30863									-0.241568	0.127246	-0.0937357	0.49606	0.336082	0.0966063
	-0.063099	-0.112772	-0.124319	0.491987	0.188082									0.471444	0.169224	0.291113	0.0783987	0.238568	0.348881
	-0.393726	-0.184414	-0.200596	0.0933966	-0.0266161									-0.138041	0.0628488	-0.362867	0.657429	0.256447	0.114776
	-0.192333	-0.252768	-0.11962	0.636563	-0.0668031									0.306488	0.244649	-0.00386134	0.455561	0.598842	-0.380876
	-0.549389	-0.24785	-0.654328	0.475948	0.150749									0.0805857	0.251982	0.417324	0.149293	0.468742	0.641101
	-0.459617	0.560664	-0.325321	0.264154	0.30636									-0.637355	-0.227154	0.461294	0.387297	0.583969	-0.0176653
	-0.183574	0.0897888	-0.272998	0.56443	0.251873									-0.0814968	0.479816	0.125338	-0.104014	0.0248335	0.333314
	-0.061548	0.173861	-0.314454	0.156739	-0.0360927									-0.205584	-0.0323714	-0.0572838	0.453897	-0.407822	0.0595856
	-0.295026	0.155005	-0.205806	0.493535	0.590238									-0.290697	0.00593379	0.274001	0.572239	0.721198	-0.0429325
	-0.288978	0.310491	-0.220135	0.0814889	-0.0321204									-0.210856	0.303507	0.351451	0.218367	0.383716	0.187213
	0.0179326	0.158158	-0.242063	0.0143073	0.200744									0.0188768	-0.0253569	0.0812219	0.0110036	0.330644	0.420549
	-0.515759	0.197754	-0.558447	0.037173	0.219822									0.0321741	0.100493	0.420813	0.542314	0.0437302	-0.0936155
	-0.362986	0.213694	-0.0164158	0.489067	0.542247									-0.229974	0.127742	-0.140352	0.604046	0.59097	0.0262998
	-0.44159	-0.135334	-0.343898	0.0205698	0.363583									-0.321389	0.236736	0.00570622	0.0983437	0.231577	-0.13492
	-0.154926	0.105181	0.362231	0.27212	0.116656									-0.375492	-0.148393	0.486986	0.295799	-0.103456
	-0.0514374	-0.446804	-0.689151	0.169765	0.732726									-0.15556	0.0665519	0.507077	0.26231	0.292402
	-0.00459363	-0.315186	0.532436	0.345222	0.258592									0.0613261	0.388118	0.0171787	0.363622	0.35239
	-0.185187	-0.253348	-0.232679	0.154212	-0.0962242									-0.0269096	0.189556	0.195086	0.571766	0.432118
	-0.21243	-0.100816	-0.456109	0.156317	0.293002									0.296196	0.12906	0.231001	0.771449	0.0371265
	-0.247382	-0.4028	0.0151384	0.0553419	0.246789									-0.0393076	0.537793	0.0405447	0.514158	0.170396
	-0.516214	-0.443958	-0.115055	0.0515369	0.0586612									-0.136596	0.245543	-0.0333279	0.125295	0.204628
	-0.128088	-0.0153709	-0.221015	0.0261802	-0.116498									-0.265763	0.115134	-0.113859	0.592231	0.410622
	-0.204536	-0.288437	-0.746399	0.280035	0.374888									-0.210628	0.287589	0.243034	0.311034	0.0155495
	-0.51188	-0.329682	-0.243243	0.17531	0.366129									-0.317659	0.0695164	-0.206652	0.376197	0.38814
	-0.375972	0.0554785	-0.154108	0.0920226	0.470592									-0.235811	0.192537	-0.219097	0.489406	-0.0134742
	-0.145065	-0.180182	0.0922354	0.294018	0.383109									-0.0240387	0.278565	0.470208	0.468368	0.15803
	-0.37342	-0.543847	-0.207085	0.250896	0.583732									-0.26359	-0.0605306	-0.0886778	0.331703	0.601728
	-0.149047	0.15559	-0.237916	0.141782	0.194961									0.0715915	0.0916545	0.214619	0.500398	-0.0702832
	-0.25571	0.384063	0.143032	0.0979102	0.110734									0.617003	-0.0432067	-0.00627091	0.668723	0.123306
	-0.23553	-0.204446	-0.356075	0.0852124	0.537215									0.0251622	0.191761	-0.485893	0.227956	0.270256
	-0.10347	-0.120253	-0.378335	0.411161	0.444909									-0.0133276	0.196702		0.357	0.019902
	-0.228346	-0.327156	-0.293186	0.553413	0.181573									-0.157277	-0.0263944		0.49185	0.393379
	-0.234417	-0.503291	-0.421555	0.255764	0.687369									-0.120252	0.39097		0.755576	0.180197
	-0.0988674	-0.0953676	-0.249732	-0.0731583	0.664102									0.0481358	0.615649		0.7287	0.398601
	-0.230065	-0.547196	-0.492445	-0.115667	0.102983									0.645477	0.462786		0.15978	0.270988
	-0.0747914	0.0516856	-0.430429	0.309948	0.233734									-0.31197	0.770786		0.57385	0.0876222
	-0.091185	0.159844	-0.217372	-0.169626	0.11923									-0.0431134	-0.125816		0.288815	-0.0317872
	-0.0922594	-0.403006	-0.515935	-0.0249986	-0.0121									-0.421582	0.607482		0.213253	0.419333
	-0.149311	0.200565	-0.0953906	0.367251	0.406091									0.073462	0.49818		0.519213	0.0251629
	-0.343985	-0.112607	-0.233474	0.326196	0.430058									-0.3885	0.531493		0.444899	0.0200242
	-0.279416	-0.0810827	-0.263929	0.117033	-0.206228									0.223861	0.598614		0.611505	0.0200214
	-0.0444656	-0.422721	-0.404398	0.500909	0.424766									-0.196329	0.472263		0.422987	-0.0660496
	-0.584149	-0.141974	-0.288994	0.677827	0.357721									0.0889134	-0.0602713		0.424992	0.126962
	-0.382091	-0.507864	0.532912	0.357731	0.199873									0.152542	-0.269832		0.0373686	0.228979
	-0.322966	-0.0203891	-0.129766	0.0760926	-0.0365202									0.33092	0.434574		0.295881	0.0538742
	-0.103831	-0.531016	-0.723103	0.295401	0.274329									0.146816	0.193999		0.509409	-0.235601
	-0.101246	-0.709088	-0.0160762	0.440856	0.0742708									0.408778	0.107108		0.440748	0.210515
	-0.0996123	-0.227962	-0.427356	-0.0518409	-0.122542									-0.141089	0.222824		0.0646488	0.464342
	-0.552074	0.0341203	0.615683	0.0233286	0.374363									-0.0213218	0.602982		0.330777	-0.058394
	-0.190266	-0.734009	0.165689	0.403654	0.373175									0.608592	0.46195		0.395388	0.230871
	-0.574398	0.243398	-0.249677	0.353288	0.462676									-0.329989	0.383365		0.450246	0.393081
	-0.22789	0.2639	-0.583646	-0.0261879	0.137448									0.0614143	0.409674		0.41919	0.319331
	-0.201952	0.122143	-0.568732	0.198562	-0.0209989									0.139561	0.711846		0.630727	0.0151324
	-0.649994	-0.444068	-0.23765	-0.0846399	0.267214									-0.451616	0.405685		0.492125	0.52314
	-0.456655	-0.0451616	0.22913	-0.0867506	0.406877									-0.43998	0.371892		0.368303	0.35055
	-0.0784885	0.55554	-0.108496	-0.563754	0.0692328									0.000945101	0.444524		0.459417	0.324118
	-0.377508	0.033929	-0.296329	0.286943	0.461614									0.58295	0.918519		0.216131	0.359623
	-0.55732	-0.326278	0.422609	0.133449	0.587846									0.168413	0.834854		0.0948419	0.159103
	-0.111874	-0.426924	-0.0974867	0.265466	0.079306									-0.0483825	0.0768489		0.235312	0.310469
	-0.457282	-0.12223	-0.479325	0.377624	0.143889									-0.523591	0.0962349		0.492164	-0.149702
	0.141947	-0.134804	-0.0354021	0.537282	0.249837									-0.240161	0.286233		0.2222	0.138945
	-0.211321	-0.324704	-0.236546	-0.0712854	-0.0806054									-0.204736	0.6229		0.66452	0.0758889
	-0.482165	0.806132	-0.532681	0.245571	0.487376									-0.682238	0.471373		0.0726284	0.104682
	-0.78803	-0.138727	-0.429885	0.0108668	0.409393									-0.237629	0.307101		0.267839	-0.0745009
	-0.293955	-0.34308	0.220898	-0.00765611	0.66181									-0.118551	0.317392		0.414379	0.192198
	-0.492467	0.163936	-0.554685	0.350759	0.445532									-0.0167694	-0.0355054		0.470812	0.222503
	-0.331223	-0.316949	-0.559287	0.0313556	-0.00841771									-0.202241	0.218945		0.0733103	0.416004
	-0.125146	-0.414087	-0.292491	-0.0236951	0.446547									-0.572303	0.908201		0.466715	0.382887
	-0.239815	-0.0457775	0.481893	0.264658	0.410339									0.512938	0.35761		0.641677	0.374362
	-0.841662	-0.40435	-0.204318	0.0560384	0.0920091									-0.273336	0.283156		0.359077	0.538324
	-0.311898	0.124398	-0.475594	0.251112	0.241446									-0.0499802	0.186803		0.276249	0.570169
	-0.634601	0.268518	-0.690626	0.0453366	0.179302									-0.00170733	0.324849		0.215165	0.377406
	-0.196903	0.109725	-0.602739	0.0464609	0.429542									0.684981	0.555945		0.000175653	0.0651712
	-0.542282	-0.279152	0.153927	-0.201515	0.581542									0.599593	0.168475		0.659717	0.535241
	-0.356322	0.147097	-0.144054	-0.0282402	0.273518									-0.115624	0.791277		0.614188	0.326695
	-0.281517	-0.1718	0.166739	0.369537	0.419849									-0.0640555	0.0944774		-0.0203241	0.40082
	-0.311087	-0.360092	0.11414	-0.0631406	0.504036									-0.396945	0.821527		0.121986	0.33384
	-0.7501	0.0244271	-0.244467	0.166896	0.0599626									-0.00591145	0.714159		0.213299	0.521916
	-0.376753	0.314254	-0.159948	0.0235129	0.721716									-0.417175	0.237952		0.729411	0.411771
	-0.595314	-0.340672	-0.383407	0.0277981	0.474608									-0.0573757	-0.0316231		0.430105	0.366226
	-0.659712	0.350758	0.0667979	0.277482	-0.0597309									0.48234	0.359641		0.203202	0.246405
	-0.253677	-0.225105	-0.30109	0.122974	0.196588									0.127471	0.112022		0.631645	0.0181782
	-0.808605	0.218041	-0.625866	0.500188	0.242274									0.0756199	0.346837		0.770167	0.388156
	0.107082	-0.183597	-0.523273	0.363879	0.269676									0.0134616	0.632246		0.618357	0.399691
	-0.20126	-0.432194	0.00342133	0.298257	0.0767941									-0.0740282			0.688262	0.125473
	-0.184366	0.0604034	-0.112148	0.451808	0.610777									-0.229067			0.57479	0.882829
	0.109089	0.0663986	-0.418776	0.127521	0.486764									-0.194796			0.662916	0.441844
	0.11746	0.197365	0.0141445	0.291472	0.274888									0.0267992			0.000458978	0.815039
	0.17486	0.119836	-0.0657694	0.632456	0.334051									-0.352827			0.469289	0.243871
	-0.217636	-0.160519	-0.113913	0.24898	0.474442									-0.56409			0.666646	0.26802
	0.213081	-0.550475	-0.379428	-0.0173733	0.221515									0.114896			0.639708	0.412695
	-0.183393	0.477778	-0.351679	0.555783	0.0783107									-0.0907615			0.766878	0.452478
	0.0919941	-0.506016	-0.225417	-0.213918	0.506045									0.000110741			0.675684	0.0211134
	-0.322493	0.0208967	-0.541997	0.461564	0.273645									0.183615			-0.101434	0.22495
	-0.0999562	0.418396	-0.049473	-0.0238183	0.190044									-0.184079			0.342949	0.233321
	-0.433622	-0.168411	-0.339102	-0.34238	0.418145									-0.0450702			0.684547	0.772287
	-0.257461	0.595719	0.468174	0.453825	0.0778536									-0.16112			0.0834514	0.3474
	-0.404556	0.475712	0.0389972	0.37074	0.228435									-0.296149			0.662374	0.321665
	-0.235127	0.0383245	-0.107037	0.212454	0.375846									-0.124196			0.6322	0.270945
	-0.300793	-0.0854827	-0.11238	0.180987	0.515582									0.208741			0.683319	0.597934
	-0.00189699	-0.212909	-0.277291	0.0318368	0.567502									-0.104987			0.112024	0.377592
	-0.264506	-0.503184	-0.213107	0.639224	0.488263									0.102684			0.705824	0.400297
	-0.751156	-0.325905	-0.0201491	0.467112	0.11643									-0.397777			0.786416	0.402385
	-0.50182	0.32999	-0.205927	0.246162	0.244724									0.194096			0.0500125	0.669148
	-0.512533	-0.367286	-0.289848	0.28203	0.398112									0.133511			0.439854	0.149806
	0.074636	-0.427401	-0.657442	0.369186	0.134947									0.167651			0.715388	-0.0178711
	-0.296104	-0.0886477	0.234052	0.496792	-0.149023									0.067834			0.706459	0.524307
	-0.445779	-0.0150068	-0.261001	0.65591	0.758098									-0.0589672			0.839907	0.0477841
	-0.24734	0.353149	-0.16676	0.275962	0.436362									-0.0309851			0.774414	0.337005
	-0.376696	0.66124	-0.697514	-0.0887632	0.0710069									0.527094			0.541169	0.136529
	-0.254515	-0.543838	-0.423506	-0.057291	0.408841									-0.291577			0.797045	0.199995
	-0.318261	0.0999907	-0.408828	0.432699	0.542919									-0.199815			0.74789	0.14871
	-0.0358823	-0.70793	-0.354015	0.519429	0.566325									0.617101			0.54533	0.265244
	-0.210667	0.125864	0.109798	0.157235	0.405201									-0.187197			0.59951	0.3204
	-0.412295	-0.53871	-0.199633	0.022736	0.136547									-0.0515849			0.584586	0.172235
	-0.347541	-0.344375	-0.676981	0.474477	0.555366									-0.0808234			0.640698	0.508396
	-0.721232	-0.154548	-0.667084	0.475839	0.0245897									-0.289315			0.415711	-0.38458
	-0.349509	-0.513288	-0.426163	0.127682	0.594283									-0.479718			0.279999	0.0854651
	-0.418761	0.442512	-0.651237	-0.368422	-0.0232868									0.581649			0.8025	0.452303
	-0.302299	-0.610466	-0.379482	0.213625	0.684303									-0.268322			0.514802	0.383352
	-0.14961	0.0225348	0.631387	0.498183	0.333509									-0.195			0.406473	0.377426
	-0.344497	-0.243607	-0.0980444	0.512348	0.514642									-0.172377			0.85925	0.290642
	-0.471548	-0.735025	-0.46789	-0.0303502	0.301054									-0.0942721			0.156321	0.22569
	-0.525834	0.0820963	-0.00921269	0.1713	0.16692									0.479397			0.577723	0.00851944
	-0.350729	0.0345064	-0.0202007	0.424641	0.449956									-0.333102			0.776008	0.468328
	-0.196619	-0.113213	-0.144514	-0.130277	0.465588									0.299588			0.515775	0.0347116
	-0.288846	0.0654495	0.169263	0.18281	0.0782115									-0.270511			0.502545	-0.180825
	-0.0281748	-0.0305168	-0.639366	0.485576	-0.043445									-0.174742			0.700439	0.377859
	-0.27241	0.571571	-0.045823	0.137548	0.396925									0.00114051			0.373169	0.346189
	0.318733	-0.0634628	-0.34894	0.59345	0.65864									-0.446109			0.523964	0.0112185
	-0.240833	0.113282	-0.230551	-0.207829	-0.120456									0.11042			0.401212	0.122433
	-0.58726	-0.16015	-0.284744	0.293629	0.645476									-0.0232607			0.328182	0.0489121
	-0.361544	-0.414368	0.479326	-0.0615368	-0.01335									0.489113			0.567126	0.214042
	-0.669607	0.0354392	0.543321	-0.0434161	0.355249									0.420257			0.574074	0.195653
	-0.0731963	0.280912	-0.418905	0.310617	0.540325									0.481434			0.609221	0.359607
	-0.476801	-0.301551	0.195532	0.0122582	0.620022									-0.171127			0.576351	0.262332
	-0.265024	0.118206	-0.450285	0.304396	0.370189									-0.153083			0.576021	0.147589
	-0.454426	-0.175428	-0.176543	0.248282	0.586627									-0.0210106			0.607392	0.413331
	0.391563	-0.12348	-0.467818	0.361243	0.418912									0.158082			0.557942	0.130689
	-0.116254	-0.586848	-0.667932	0.300022	0.407844									-0.215198			-0.163667	-0.0277103
	-0.734975	0.000817521	-0.403596	0.260254	0.565142									-0.0912163			0.384471	0.398608
	-0.442356	-0.150226	-0.552579	-0.0337204	0.473739									-0.341196			0.0686894	0.171512
	-0.083743	-0.144457	0.0300143	0.49	0.031816									0.0639666			0.675473	0.242476
	-0.297025	0.194633	-0.160785	0.573057	0.627596									-0.54028			0.534739	0.283346
	-0.0297429	-0.592468	-0.286858	-0.0592877	0.238643									0.133592			0.523123	-0.34849
	-0.212022	-0.471846	-0.376369	-0.00411297	0.122917									-0.0444663			0.555787	-0.0335857
	0.108686	0.254443	-0.392722	0.188473	0.212666									-0.181279			0.709071	0.0878792
	0.0254833	-0.633873	-0.087862	0.475297	0.138123									0.278399			0.661342	0.0733464
	-0.168159	-0.231492	-0.0203979	0.509138	0.5329									-0.0320754			0.5545	0.0439176
	-0.524909	-0.219494	-0.741744	0.670785	0.495768									0.343636			0.134268	0.0946951
	-0.119475	-0.629272	-0.619413	0.22149	0.565517									-0.12222			0.293703	0.017379
	-0.314608	0.152279	-0.204059	0.268926	0.674698									0.0471164			0.375558	0.0222369
	-0.107129	-0.214304	-0.732232	0.0821135	0.174166									-0.204857			0.292185	0.0932794
	-0.00917251	-0.295027	-0.520969	0.506861	0.201385									0.0816608			0.353417	0.0150613
	-0.705294	-0.366031	-0.701272	0.0609238	0.156639									0.124755			0.319542	0.0855183
	-0.340942	0.0106679	-0.432226	0.290009	0.533942									0.37967			0.805845	-0.322374
	-0.383204	0.245928	-0.680113	0.0597807	0.274943									-0.332302			0.292537	0.241873
	-0.158134	-0.181489	-0.317617	0.180427	0.689428									-0.290116			0.580975	0.106053
	0.0304678	-0.332133	-0.501847	0.00432765	-0.101382									0.155374			0.691325	-0.353688
	-0.311326	-0.164778	-0.566151	0.354123	0.0247942									-0.118732			-0.202936	0.290395
	0.212138	-0.416532	-0.424461	0.300091	0.0555876									-0.119865			0.599531	0.930165
	-0.481251	-0.405133	-0.413076	0.210036	0.426067									-0.213934			0.543683	0.397611
	-0.423991	-0.0373406	-0.39271	0.00395272	-0.0181553									-0.133121			0.533386	0.63488
	-0.231035	-0.103198	-0.640443	0.271142	-0.271937									-0.0634081			0.519438	0.0587306
	-0.278642	0.28178	-0.486907	0.219157	0.396535									0.281822			0.352188	0.00777579
	-0.0910763	-0.397919	-0.583639	0.0700045	-0.0554609									-0.201609			0.0263107	0.348097
	-0.0745621	-0.411736	-0.0311682	0.222064	-0.020526									-0.294941			0.434338	0.400589
	-0.35001	-0.442158	-0.00930909	0.0684582	0.656658									-0.228634			0.614654	0.179611
	-0.309572	0.43869	-0.257741	0.169265										-0.277981			0.642358	0.354437
	-0.0917795	-0.0425824	-0.370963	-0.0453471										0.038563			0.80751	0.185742
	-0.198792	-0.350644	-0.376543	-0.305561										-0.0940476			0.57818	0.400422
	-0.338314	0.44848	-0.552091	0.150125										0.395124			0.140703	0.404253
	-0.200867	-0.336536	-0.0560057	0.346651										-0.364552			0.278326	0.126861
	-0.0477125	0.0869214	-0.472818	0.0332923										0.0173901			-0.0314093	0.0976474
	-0.0845706	0.22476	0.254811	-0.0685447										-0.0791396			0.258075	0.155343
	-0.316982	-0.380969	-0.317464	0.211726										0.518429			0.425462	0.281256
	-0.0705548	-0.412006	-0.322401	0.0403771										-0.465839			-0.206955	0.348398
	-0.26124	-0.143879	-0.812772	0.670018										-0.373715			0.561865	0.245323
	-0.236775	0.477342	-0.219298	-0.0206443										0.289696			-0.0546551	-0.0434165
	-0.153471	-0.57026	-0.338151	0.0495783										-0.394181			0.685972	0.399685
	-0.288967	-0.123275	-0.333443	0.126409										0.0631916			0.453092	0.0552759
	-0.0769227	-0.277334	-0.430173	0.374984										-0.365985			0.145851	0.0395928
	-0.0877323	-0.590767	-0.423146	-0.304841										-0.193968			0.577408	0.253406
	-0.331876	-0.710991	-0.612519	0.223848										-0.314006			0.420836	0.870531
	0.0217835	0.054278	-0.379655	-0.0205085										-0.430495			0.281398	0.20281
	-0.478824	-0.410423	-0.152216	0.436371										-0.308934			0.362773	0.307717
	0.0581151	0.0434112	-0.467503	-0.0189006										-0.0683217			0.359523	0.213617
	-0.31628	-0.608249	-0.343689	-0.00670509										-0.403312			0.20599	0.334512
	-0.198691	-0.364471	0.237479	-0.0136858										-0.0526634			0.28376	0.146778
	0.0730643	-0.651311	-0.0753823	0.14715										-0.403396			0.125345	0.314261
	-0.341907	-0.374289	-0.0807608	0.477393										-0.41551			0.511126	-0.248721
	-0.315747	0.0463947	-0.0420227	0.782034										-0.180861			0.282658	-0.206845
	-0.218782	-0.220499	-0.050551	0.175039										8.52757e-05			0.505563	0.558081
	-0.0611877	0.435057	-0.518882	0.197482										-0.162829			0.571715	0.161261
	-0.432221	-0.502131	-0.397923	-0.0507637										-0.0628589			0.490733	0.244247
	0.0802979	-0.573728	-0.00498299	0.253441										-0.00436117			0.152258	0.123022
	-0.157694	-0.259847	-0.513081	0.15808										-0.326266			0.0744925	0.189765
	-0.182805	-0.551779	-0.29387	-0.0138122										-0.501405			0.376294	0.256616
	-0.571543	-0.611766	-0.343655	0.242946										0.191433			0.7046	0.191948
	-0.408049	0.199465	0.142685	-0.0245924										-0.211794			0.136996	0.535075
	-0.222827	-0.506964	0.0644398	0.373982										0.071763			-0.253057	0.0421039
	-0.000675971	0.302625	-0.234428	-0.0234417										-0.0905541			-0.0617487	0.110395
	-0.276241	-0.299391	-0.0238338	0.385785										-0.13237			0.538207	0.679151
	-0.270118	-0.212947	-0.379284	0.726731										-0.261231			0.78678	0.204742
	0.0588339	-0.627023	-0.530928	0.190596										0.0221899			0.770718	0.250676
	-0.450037	-0.580085	-0.274034	0.226662										-0.188896			0.374646	0.485694
	-0.222062	-0.114595	-0.140537	0.48542										-0.333679			0.392214	0.292017
	-0.151801	0.031208	-0.336547	0.359429										-0.195342			0.592616	0.0117794
	-0.137266	-0.45983	-0.506974	0.380769										-0.252141			0.678377	-0.0259443
	-0.364928	-0.0528035	-0.160195	0.231331										0.392537			0.837693	0.181198
	-0.130446	-0.398632	-0.721963	0.419235										0.322046			0.703571	0.360717
	-0.118661	-0.202888	-0.47266	0.249917										0.00223725			0.483923	0.278552
	-0.36807	0.0164119	-0.475285	0.295738										0.00749166			0.972692	0.328446
	-0.287176	-0.197809	-0.12432	0.215305										-0.407717			0.674323	0.188064
	-0.273401	-0.0658426	-0.70167	-0.0686077										-0.0723516			0.0114404	0.182663
	-0.174284	-0.0203397	-0.134263	0.141663										0.0444248			0.732996	0.298679
	-0.034979	0.381073	-0.122967	0.327232										-0.0455525			0.179478	-0.0552564
	-0.0652798	0.0062485	-0.447656	0.278512										-0.228889			0.50575	-0.0855734
	-0.476427	0.231932	-0.17929	0.42851										0.0324863			0.400124	-0.00403646
	0.391038	-0.0801278	0.0270792	-0.0335028										-0.246449			0.618327	0.338307
	-0.565563	-0.59879	-0.251058	0.201978										-0.0858359			0.295102	-0.0383156
	-0.510159	-0.369844	0.208954	0.197235										0.519575			0.430106	0.548287
	-0.325866	-0.603936	-0.0804852	0.713908										-0.0253661			0.0121595	0.385814
	-0.142589	0.448702	-0.389	0.52924										0.321498			0.573256	0.503869
	-0.226764	0.451692	0.11096	0.293133										0.178704			-0.189902	-0.154928
	-0.237942	-0.153941	-0.0740365	-0.0835171										-0.264513			0.184594	-0.299462
	-0.261079	0.0715905	0.0730336	0.33262										-0.300788			0.205527	0.147446
	-0.295333	-0.331747	-0.492541	-0.0650738										-0.199869			0.304746	-0.034568
	-0.357207	0.105821	-0.374233	0.240143										0.0596179			0.449648	-0.0030081
	-0.288168	0.0594968	-0.0398505	0.291927										0.141476			0.743702	0.345921
	-0.204542	0.658404	-0.247453	0.215329										-0.291839			0.482653	0.0563216
	-0.503201	-0.251913	-0.319937	0.287874										0.0504827			0.626893	-0.257466
	-0.294075	-0.217929	-0.27722	-0.26154										-0.129099			0.178313	0.524977
	-0.390165	0.651089	-0.404859	0.315104										-0.341175			0.529605	-0.0696938
	0.109569	-0.260194	-0.360503	0.210892										-0.09953			0.0849849	0.243344
	-0.592385	-0.171158	-0.228583	0.0413894										0.556519			0.584583	0.141958
	-0.220345	-0.0430087	-0.427168	0.0404344										0.186587			0.657445	0.147541
	-0.393322	0.37684	-0.524197	0.536617										0.161322			-0.0315441	0.267793
	-0.00595314	0.14543	0.587084	0.389642										-0.326837			0.157971	0.0745092
	-0.201467	-0.0961243	-0.837104	0.12427										-0.311895			0.307755	0.396511
	-0.05644	0.266122	-0.190632	0.258532										-0.429061			0.333677	0.534794
	-0.571825	0.141483	-0.702817	0.327184										0.0219585			0.519703	0.662834
	0.101864	0.173618	-0.0948935	0.317238										-0.134095			-0.0768248	0.441925
	-0.247473	0.603359	-0.488953	0.482169										-0.343091			0.475632	0.43701
	-0.29668	-0.528965	-0.631826	0.342726										-0.363423			0.141671	0.0399181
	-0.0633576	-0.562782	-0.180617	0.286667										-0.0823506			0.139987	0.612931
	-0.0744979	0.64213	-0.0914124	0.610496										0.12392			0.565096	0.228163
	-0.20642	-0.628292	-0.541991	0.294563										-0.222568			0.474421	0.645249
	-0.481812	-0.268574	-0.857836	0.235749										-0.0908398			0.463804	0.470066
	-0.380119	-0.549059	-0.311423	0.273835										-0.0585656			0.286355	0.433501
	-0.679073	-0.561548	0.193284	0.245605										-0.0918467			0.0459287	0.645299
	-0.111021	0.275986	-0.30871	0.353943										0.400706			0.307663	-0.0125941
	-0.471673	-0.1991	-0.161362	0.47658										-0.00309327			-0.275592	0.537012
	-0.2473	0.0332858	0.1735	0.291741										-0.070799			0.317166	0.292257
	0.0472597	0.0167481	-0.294575	0.305356										-0.25612			0.750099	0.414345
	0.0812793	0.353897	-0.0821489	0.4289										0.415655			0.480331	0.54801
	-0.517847	-0.341501	-0.18249	0.444326										-0.234572			0.178142	0.325657
	-0.16434	0.343713	-0.544	0.532028										0.0373868			0.597369	0.362051
	-0.561627	-0.564278	-0.405754	0.170778										0.349917			0.543237	0.159706
	-0.368913	-0.266972	-0.255592	0.548443										0.499336			0.544467	0.213079
	0.0464738	-0.421296	-0.319865	-0.318896										-0.242566			0.211323	0.505959
	0.07114	-0.660211	-0.0964901	0.253888										-0.295964			0.250872	0.538171
	-0.617639	-0.42311	-0.373696	0.383101										-0.378376			0.183859	0.268978
	-0.32434	-0.45548	0.045114	0.284051										0.178151			0.524165	0.488357
	-0.512873	-0.305418	-0.206164	0.572601										0.381432			0.508044	-0.0475872
	-0.255023	0.116519	-0.182256	0.0461778										-0.158821			0.757021	0.0403819
	-0.598944	-0.308178	-0.113248	0.320896										0.334129			0.908896	0.5002
	-0.515884	0.213654	-0.751699	0.1061										0.588371			0.72721	0.324742
	-0.492873	-0.0218338	-0.554476	0.362365										0.0598883			0.548531	0.568804
	0.182155	-0.175709	-0.0501766	0.0262133										-0.299993			0.589193	0.313401
	-0.536459	0.652898	-0.0286019	0.448196										-0.308661			0.257195	0.552128
	-0.00378972	0.301543	-0.29832	0.33515										0.150397			0.597603	0.463599
	-0.284467	-0.284385	-0.0483694	0.476244										-0.106836			0.161302	0.256024
	-0.53768	0.692061	-0.333206	0.483188										-0.200874			0.7396	0.77871
	-0.297088	-0.271578	-0.461799	0.266556										0.394553			0.0922621	-0.0534574
	-0.559478	-0.64217	-0.0619098	0.518273										0.330701			0.0817715	0.250452
	0.143513	-0.159169	-0.46109	-0.404585										0.066209			0.876483	0.181466
	-0.254937	0.646628	-0.0699105	0.276884										0.342043			0.153129	0.54928
	-0.424743	-0.181717	-0.177005	-0.0899026										0.300142			0.514868	0.76492
	-0.507422	0.0796611	-0.296028	0.245755										0.247273			0.349625	0.728104
	-0.224838	-0.443479	-0.236736	0.280719										-0.216005			0.395355	0.314519
	-0.240674	-0.572132	-0.539329	0.349462										-0.358378			-0.289903	0.444259
	-0.500235	0.470477	-0.442215	0.0318646										-0.405758			0.762354	0.00715331
	0.0299494	-0.262379	0.402106	0.102812										-0.1228			0.096393	0.475977
	-0.364624	-0.0939033	0.135711	0.477743										0.0475443			0.702496	0.760637
	0.121966	-0.294515	-0.349824	0.359903										-0.5873			0.472906	0.592083
	-0.106707	-0.375541	-0.369989	-0.273243										-0.250973			0.394446	-0.0220698
	-0.392603	-0.412725	-0.620626	0.0887212										0.631316			0.470757	0.63184
	-0.359335	-0.264116	-0.70184	0.283831										-0.328643			0.0873376	0.202887
	0.027246	-0.472964	-0.228354	0.300042										0.179402			0.283118	0.486334
	-0.556165	0.191966	-0.308436	0.393383										-0.232434			0.383965	0.459001
	-0.176948	-0.465497	-0.208737	-0.00776924										-0.558214			0.324053	0.485354
	-0.370404	-0.253976	-0.232956	-0.170447										-0.517402			0.238259	0.364762
	-0.290851	0.27269	-0.515599	0.379902										-0.18444			0.673102	-0.119962
	-0.305868	-0.221408	-0.297076	0.414023										-0.452532			0.436448	0.568574
	-0.0645836	-0.0356517	-0.568853	0.209957										-0.177634			0.215464	0.641046
	-0.383158	0.107394	0.406661	-0.161184										0.0985908			0.678212	0.750763
	-0.253674	0.186466	-0.20889	0.15659										-0.0718613			0.430463	0.123768
	-0.554376	0.105342	-0.587676	0.462908										0.187748			0.618564	0.120411
	-0.329796	-0.432835	-0.36533	0.16358										-0.210634			0.651776	0.104842
	-0.548632	0.168148	-0.115111	0.314545										-0.496177			0.690042	0.223352
	-0.155584	0.0401225	0.00688323	0.456475										-0.0717681			0.337463	0.516907
	-0.121103	-0.225005	-0.176635	0.028083										0.024342			0.370291	0.411854
	-0.0586843	-0.334861	-0.344203	0.73123										-0.356549			0.640872	0.508843
	-0.140225	-0.0598522	-0.266676	0.242933										-0.00402108			0.481977	0.59149
	-0.690059	-0.85315	-0.00838712	0.491741										-0.20224			0.0878081	0.243094
	-0.0368763	-0.59182	0.0812961	0.316189										-0.518761			0.413407	0.382926
	-0.660371	-0.123319	-0.154693	0.227781										0.402101			0.524675	0.473835
	-0.315161	0.00233384	-0.18083	0.400547										0.113445			0.552432	0.501865
		-0.405553	-0.563839	0.145701										0.18698			0.423894	0.401039
		-0.0297292	-0.159791	0.0791599										-0.0603137			0.487169	0.325729
		0.0654221	-0.325176	0.278598										-0.189845			0.606249	-0.0624103
		0.201198	-0.362825	0.0943492										-0.33206			0.59442	0.00551683
		0.228517	-0.142558	-0.203481										0.352798			0.882322	0.210358
		-0.557937	-0.43054	0.0221031										-0.132354			0.580466	0.500638
		-0.393888	-0.541707	0.032448										0.180006			0.218584	0.354724
		0.127407	0.173075	-0.105291										-0.226662			0.654517	0.0369757
		-0.88109	0.0572945	0.00820818										-0.0045516			0.647962	0.25004
		0.176615	-0.397537	0.199709													0.378645	0.195938
		-0.0973753	-0.229381	-0.039852													0.489053	0.473136
		0.0585587	-0.693047	0.297897													0.343962	0.568479
		-0.470296	-0.401237	-0.0603433													0.628864	0.437796
		0.298574	-0.731534	0.477354													0.351257	0.169856
		-0.473141	-0.109406	0.343453													0.337494	0.377793
		0.253827	-0.203409	-0.111349													0.488442	0.522721
		-0.609328	-0.227338	0.345828													0.544798	0.397001
		-0.345879	-0.00575039	0.197686													0.683038	0.3735
		-0.417744	-0.272119	0.274626													0.319611	0.53914
		-0.0422564	0.249806	0.332387													-0.156329	0.242349
		-0.0222479	0.479628	0.377734													0.251027	0.238077
		0.278331	0.0266489	0.386899													0.324984	0.580645
		0.118196	-0.396513	0.581493													0.605391	0.287823
		-0.62327	-0.376029	0.419745													0.646723	0.384335
		-0.440364	-0.584928	0.144739													0.552043	0.477181
		0.377767	-0.136276	0.25986													0.70348	-0.020088
		0.222793	-0.437982	-0.0204296													0.716943	0.360765
		-0.476068	-0.698546	0.354037													0.931785	0.776298
		-0.416015	-0.199708	0.0815105													0.565601	0.192452
		-0.649364	-0.498504	-0.277016													0.406939	0.287349
		-0.160438	-0.239112	0.596222													0.686867	0.645227
		0.293881	-0.276824	0.248884													0.300815	0.0781054
		-0.159523	-0.340822	0.365738													0.486683	0.628992
		-0.580283	-0.72619	-0.12232													0.627539	0.615112
		-0.306059	-0.614364	0.365975													0.42706	0.146906
		-0.714742	-0.47879	0.137131													0.648024	0.469914
		-0.103448	-0.313712	-0.0644906													0.93954	0.402544
		-0.359118	0.419708	0.246583													0.552548	0.730584
		-0.585595	-0.588843	0.0734134													0.770072	0.149014
		-0.0686653	-0.204959	0.193519													0.497222	0.363424
		-0.573582	-0.726633	-0.0316011													0.614263	0.284286
		-0.712217	-0.3398	-0.124046													0.101301	0.517184
		0.0816722	-0.310512	-0.0504526													0.340671	0.276841
		-0.360943	-0.777313	0.165607													0.250786	0.193357
		-0.105645	-0.319135	0.47942													0.72247	0.16933
		-0.100912	-0.196443	0.531851													0.724727	0.193868
		-0.358097	-0.205624	0.343101													0.47817	0.421175
		0.177743	-0.435188	0.261145													0.435115	0.559411
		0.140724	-0.493069	0.0503858													0.389505	0.0940118
		0.318101	-0.126537	0.261546													0.551866	0.278159
		0.158291	-0.28493	0.0112967													0.48037	0.353304
		-0.499563	-0.23046	0.290465													0.562004	0.266886
		-0.0600345	-0.222696	0.233029													0.654984	0.407258
		-0.294277	0.359282	-0.0355596													0.461173	0.525589
		-0.54113	0.259009	0.437745													0.294291	0.245548
		-0.382039	-0.65895	0.542704													0.352313	0.60213
		0.200469	-0.211964	0.599359													0.0962566	0.209874
		-0.324005	-0.577106	0.518493													0.888664	0.382857
		-0.472318	0.276119	0.0115914													0.325146	-0.0215438
		-0.327054	-0.199033	0.59416													0.508753	0.497143
		-0.268458	0.143133	0.14009													0.719087	0.574196
		-0.668215	-0.276714	0.0508465													0.379047	0.557518
		-0.545036	0.024687	0.622034													0.471267	0.529777
		-0.0280374	0.556964	0.254226													0.211247	0.118826
		-0.356956	-0.851546	0.283396													-0.132654	0.282427
		0.0833421	0.140381	0.231259													0.816542	0.373264
		-0.276974	0.0233984	0.413046													0.11067	0.208386
		-0.395282	0.101571	0.07229													0.3642	0.197294
		0.159463	-0.522249	0.201861													0.658972	0.219937
		-0.431863	-0.583413	0.1137													0.389862	0.521078
		-0.292758	0.0575866	-0.0331519													0.615961	0.307913
		0.0665827	-0.0614406	0.386155													0.678429	0.386601
		-0.242351	0.733941	0.517728													0.494784	0.192887
		0.264895	-0.100612	0.569451													0.473143	0.442054
		0.345669	-0.0787875	0.54252													0.671975	0.357902
		0.0880427	-0.422286	0.505391													0.652039	0.0452428
		-0.184306	-0.0969698	0.254532													0.395694	-0.257097
		-0.209416	-0.13465	0.211432													0.81403	0.238634
		0.795859	-0.137082	0.507384													0.39653	0.31536
		-0.200867	-0.441191	0.241338													0.338298	0.150227
		-0.375826	-0.166398	0.454384													0.574151	0.397649
		-0.460752	-0.306877	0.169655													0.404178	0.351175
		-0.0516884	-0.0215802	0.606388													0.567207	0.0661318
		-0.156822	-0.200536	0.0327054													0.306802	0.218029
		0.184769	-0.187416	0.135777													0.695239	0.219542
		0.297858	-0.212879	0.213286													0.153263	0.269914
		0.245226	-0.403906	-0.0248336													0.822158	0.194894
		-0.546827	-0.19513	0.207803													0.442129	0.754448
		-0.739043	0.0901446	0.312107													0.419776	0.204417
		-0.528249	-0.326196	0.0680534													0.774791	0.288302
		0.221739	-0.0305807	0.123884													0.403244	0.20194
		-0.150362	-0.0788187	0.299573													0.764633	0.225392
		0.37144	0.205478	0.156409													-0.361134	0.93209
		-0.147915	-0.539385	0.448182													0.578657	0.631193
		-0.7378	-0.230659	0.0574456													0.0277745	0.301794
		-0.525776	0.0197157	0.114392													0.633207	0.0731266
		0.00423606	0.321681	0.689677													0.442281	0.270529
		-0.63036	-0.0322347	0.0599581													0.531513	0.0951604
		0.30645	-0.23166	0.0787314													0.747301	-0.0372397
		-0.758289	-0.474513	-0.0799906													0.346286	0.520477
		-0.837126	-0.556999	-0.0244098													0.644662	0.0828918
		0.0298104	-0.0170675	-0.0835946													0.408614	0.467932
		0.182528	-0.452497	-0.0566156													-0.0685381	-0.141209
		-0.651256	-0.313422	0.391613													0.528831	0.0498311
		-0.842129	0.0550607	0.47807													0.129207	0.424691
		-0.389913	-0.299536	-0.0111503													0.376276	0.724203
		-0.144734	-0.148195	0.0961157													0.439193	0.00954989
		-0.00919668	-0.0290161	0.0283112													0.747105	0.370146
		0.0363321	-0.2326	0.115564													0.689522	0.406287
		-0.597319	0.467382	0.370837													0.427983	0.197716
		-0.758691	-0.614771	-0.0209697													0.480065	0.59941
		-0.387674	-0.0207489	0.560963													0.57689	0.505963
		-0.20647	-0.515034	0.143366													0.647479	0.217492
		-0.703805	0.0999454	0.25679													0.753426	0.0182164
		-0.461284	-0.408121	0.376714													0.487327	0.495556
		0.152341	-0.608506	0.411173													0.209083	0.269033
		-0.0203326	-0.435384	0.663658													0.730965	0.187185
		0.0015969	-0.326582	0.150445													0.512465	0.54846
		0.309597	-0.0671776	0.36656													0.510613	0.646531
		-0.216808	-0.164117	0.451325													0.410207	0.249448
		-0.468402	-0.559111	0.110844													0.716651	0.143387
		0.484697	-0.0811345	0.310432													0.0862985	-0.0285918
		-0.356801	-0.437973	0.0629631													0.524966	0.256086
		0.115386	-0.4124	0.311653													0.503144	0.547604
		-0.406128	-0.311127	0.247634													0.482207	0.220173
		0.0223258	0.024512	0.0122392													0.56435	0.00768342
		-0.227432	-0.21929	0.50973													0.623484	0.394933
		-0.391112	0.22185	-0.00725237													0.539492	0.308044
		-0.00604707	-0.380427	0.317804													0.468125	0.321818
		0.074456	0.244124	0.530865													0.483134	0.0225374
		0.0421899	-0.043025	0.429439													0.718242	0.382812
		-0.58495	-0.362902	0.037413														-0.0450467
		0.144099	0.00515961	0.409906														0.388862
		-0.0447469	0.0416705	0.00797618														0.0359341
		-0.291177	0.0856442	0.0471989														-0.0419043
		0.733857	-0.149958	0.214577														0.19641
		-0.162275	-0.0982975	0.246887														0.451733
		-0.188494	-0.349179	0.239127														0.0194242
		-0.208808	-0.218004	0.456838														0.432565
		-0.513815	-0.350306	0.633486														0.128536
		0.0296307	0.05364	0.301391														0.164634
		-0.303098	0.106711	0.0290779														0.0770953
		-0.250625	-0.204947	-0.00159222														0.489708
		-0.453205	-0.264314	0.509973														0.550776
		-0.220535	-0.310139	0.685267														0.707287
		-0.194702	-0.455564	0.241963														-0.0923737
		-0.0750062	0.27314	0.503837														0.116422
		0.076517	0.182338	0.510044														0.357303
		-0.325046	-0.143732	0.531512														0.0801292
		-0.427262	-0.0054815	0.725549														0.220836
		0.322789	-0.284318	0.252503														0.694976
		0.0769906	-0.238633	0.429112														0.0682993
		0.285861	-0.326256	-0.0015025														0.786527
		-0.087508	-0.268804	-0.00809089														0.360412
		-0.283467	-0.101421	0.365454														0.21889
		-0.454781	0.100854	0.09453														0.633564
		0.26613	-0.877248	-0.0307278														0.392553
		-0.158629	-0.456982	0.315538														0.0496949
		0.324192	0.0420403	0.668025														0.0657336
		0.367966	-0.482171	0.0726551														0.0355954
		0.300961	-0.0853615	0.500083														0.230168
		0.678757	0.262837	0.378607														0.398809
		-0.617959	-0.0427851	0.0356286														0.145949
		-0.107332	-0.23528	0.507999														0.233774
			-0.378662	0.490381														0.0182302
			-0.496385	0.466671														0.564074
			-0.690412	0.107471														0.0509129
			-0.11374	0.708677														0.169475
			-0.639557	0.0625757														0.386297
			-0.46464	0.335972														0.669456
			0.211994	0.541547														0.360702
			-0.177356	0.0400098														0.0464467
			-0.110314	0.360772														0.61428
			-0.105275	0.0791212														0.369372
			-0.519135	0.671297														0.374989
			-0.193515	0.0430662														-0.237403
			-0.467219	-0.0338149														0.594916
			-0.656657	0.376153														0.245578
			-0.388615	0.0297369														0.0461759
			-0.194485	-0.164031														0.38541
			-0.345408	0.738259														0.183106
			-0.300669	0.00072048														-0.0452098
			-0.294529	0.336895														0.387432
			-0.159587	0.0203554														0.526822
			0.0595696	0.440723														0.529481
			-0.340772	0.0290613														0.27474
			-0.340423	0.0825256														0.470502
			-0.158643	-0.0085261														0.602816
			-0.138911	0.390672														0.575042
			0.188904	0.210703														0.152625
			-0.0833609	0.317938														0.382607
			-0.0563855	0.222026														0.150137
			-0.541744	0.11723														0.132604
			-0.401379	0.0434693														0.287384
			-0.420348	0.200468														0.126805
			-0.079175	0.266165														0.736253
			-0.246388	0.536448														0.121982
			-0.315547	0.57958														0.116525
			0.209587	0.408095														0.611888
			-0.00193664	0.375044														0.329504
			-0.405437	-0.0363068														0.149617
			-0.751545	-0.0908501														0.526957
			0.156072	-0.0713743														0.451487
			-0.357335	0.541283														0.141196
			-0.383581	0.410887														0.117532
			0.301439	0.185668														0.398945
			-0.104989	0.203854														0.000818879
			0.118663	-0.149648														0.416965
			-0.244408	-0.132296														0.334427
			-0.417538	0.0419239														0.208602
			0.241525	-0.123979														-0.105492
			-0.0245307	0.230939														0.43911
			-0.344628	0.307098														0.145968
			-0.47081	-0.102212														0.473495
			-0.434403	0.0195799														0.163326
			-0.477548	-0.0487653														0.631013
			-0.129278	0.405289														0.44237
			-0.317633	0.277285														0.374093
			-0.445402	0.11826														-0.193502
			-0.202494	-0.0129117														0.359587
			-0.229262	-0.199045														0.333692
			-0.349582	0.503109														0.594986
			-0.274642	-0.049476														0.24945
			0.344785	0.303254														0.299532
			0.267498	0.382974														0.173163
			-0.00643713	0.0537678														-0.00127899
			-0.212823	0.225836														0.387611
			-0.471372	0.30894														0.00845097
			0.420819	0.161184														0.27999
			-0.295023	0.310495														-0.0218717
			0.51862	0.684904														0.405866
			0.224088	-0.00168143														0.30071
			-0.365996	0.0114664														0.112742
			-0.484161	0.188079														0.493362
			-0.243123	0.0370267														-0.00512389
			0.0944748	0.376018														0.104727
			0.377864	0.141704														0.274033
			0.220296	0.159816														0.021439
			0.46926	0.163078														0.129889
			0.232096	0.410971														0.13089
			-0.0196707	0.563164														0.152206
			-0.207514	-0.065691														0.330856
			-0.393243	-0.0537277														0.605792
			-0.339414	0.265697														0.475075
			-0.227168	-0.0141628														0.190366
			0.254563	0.328377														0.286219
			-0.181442	0.239951														0.245428
			0.0648191	-0.0381824														0.186934
			-0.357869	0.204048														0.270611
			-0.687732	-0.374715														0.266505
			-0.255506	0.320334														0.306388
			-0.457128	0.327641														0.132994
			-0.331372	-0.0557828														-0.491005
			-0.415149	0.129069														0.160466
			0.289985	-0.051248														0.0580642
			-0.170658	0.311401														0.458978
			-0.497276	0.374777
			-0.156852	0.230471
			-0.523374	0.150162
			-0.264486	0.424777
			-0.205127	0.0303609
			-0.135636	0.0435518
			0.175414	0.118381
			0.0578422	-0.190852
			-0.434127	0.518239
			-0.267912	0.287747
			-0.279541	0.604226
			-0.0671816	0.297472
			-0.415293	0.378249
			-0.0524691	0.22075
			-0.374298	0.475595
			-0.484447	0.325393
			-0.382628	0.258418
			0.272826	-0.0159989
			-0.454375	0.298816
			-0.392737	0.281746
			0.258314	0.00482474
			0.141475	0.223391
			-0.342424	0.582351
			0.0341801	0.0605208
			-0.16155	0.294473
			-0.174894	-0.0463463
			-0.370373	0.389131
			-0.76792	0.403683
			-0.21948	0.210569
			-0.24457	0.21655
			0.375875	0.324524
			-0.327122	0.209572
			-0.433684	0.551685
			-0.31283	0.259859
			-0.270055	0.0871994
			0.482618	0.363958
			-0.538423	0.153258
			0.123903	0.271087
			-0.466681	0.418139
			-0.030174	0.267425
			0.0422328	0.156288
			-0.392774	0.293452
			-0.0997418	0.150341
			-0.463804	0.230745
			0.562483	0.174719
			-0.853913	0.216319
			-0.310395	0.661548
			0.206238	0.278647
			0.226178	0.430162
			-0.534329	0.368321
			-0.345406	0.328284
			-0.287345	-0.00551444
			-0.554876	0.176563
			-0.0317412	-0.00181045
			-0.40414	0.245219
			-0.198208	0.668242
			-0.188034	0.477353
			0.151359	0.0232579
			-0.372385	0.00173192
			-0.543735	0.64122
			-0.0598072	0.0291347
			-0.279819	0.0152925
			-0.400397	-0.0269781
			-0.246269	-0.0176936
			-0.547709	0.144811
			-0.0161141	0.0213905
			-0.431642	0.2306
			-0.629817	0.100569
			-0.43024	0.02918
			-0.243987	0.0145695
			-0.268448	0.084228
			-0.430121	-0.133073
			-0.385629	0.263012
			-0.545215	0.426783
			-0.535821	0.249089
			-0.247992	0.448399
			-0.475064	0.605114
			-0.500081	0.619513
			-0.164072	0.50912
			-0.441232	0.342465
			-0.576893	-0.813092
			-0.430512	0.453274
			-0.808031	0.258463
			-0.824635	0.327862
			-0.654013	0.375549
			-0.150409	0.252571
			-0.214726	0.403306
			-0.472597	-0.022569
			0.0666998	-0.0474515
			-0.267301	0.261578
			-0.400399	0.547922
			-0.281506	0.102119
			0.0801722	0.111173
			-0.269588	0.26921
			-0.228869	0.477176
			-0.542667	0.870307
			0.0355546	0.318546
			-0.112925	0.267674
			0.47101	0.648443
			-0.518538	-0.00332373
			0.0437558	-0.0191267
			-0.0856847	0.326912
			-0.518529	0.262149
			0.00317536	0.118812
			-0.3088	0.449492
			-0.314717	0.165038
			-0.380703	0.110048
			0.235431	0.151463
			-0.246956	0.271142
			0.0725736	0.20543
			-0.0466955	0.575594
			0.010716	0.529772
			0.0636781	-0.0482612
			-0.521463	0.155874
			-0.628133	0.371453
			-0.422585	0.11613
			0.12428	0.412936
			0.10943	0.330719
			-0.17807	0.471034
			-0.241759	0.162249
			-0.600474	0.278531
			0.0279673	0.350261
			-0.379971	0.524155
			-0.299378	0.0840846
			0.0475265	-0.0529438
			0.00938268	0.130569
			-0.169948	0.503399
			-0.410043	0.478086
			-0.103334	0.656632
			-0.519359	0.0270075
			-0.442746	0.310783
			-0.685724	0.22591
			0.500254	0.193167
			-0.321648	-0.00825041
			-0.725566	0.14843
			-0.321221	0.0520421
			-0.0976215	0.362489
			-0.46643	0.16565
			-0.464957	0.293041
			-0.11197	0.0189532
			0.12197	-0.113819
			-0.226729	0.474862
			-0.200056	0.115909
			-0.14839	-0.0879811
			0.0899597	0.29048
			-0.748592	0.190371
			-0.341537	0.200552
			-0.512005	0.381055
			-0.559002	0.483043
			-0.0700864	0.440913
			-0.596636	0.170098
			0.191243	0.363328
			-0.343337	0.0751681
			0.536248	0.12808
			-0.0873715	0.124245
			-0.415297	-0.0652195
			-0.335518	0.152495
			0.571317	0.484229
			-0.189611	0.302536
			-0.136299	0.380293
			-0.211018	0.0660259
			-0.299445	0.0384269
			-0.0587993	0.192067
			0.213462	0.426831
			-0.238073	0.342533
			-0.131649	-0.00963598
			0.0847967	0.302251
			0.0331583	0.0448031
			-0.123495	0.376353
			-0.285011	0.422973
			-0.240734	0.270392
			-0.569276	0.0797896
			-0.363319	0.0885771
			-0.263773	0.490988
			0.0648548	0.183669
			-0.286936	0.216664
			-0.3914	0.278441
			-0.0756268	0.540094
			-0.0812698	0.244426
			-0.553121	0.606209
			-0.265618	0.024472
			0.173594	0.566975
			-0.617368	0.544305
			-0.397526	0.311669
			-0.800341	-0.0355293
			-0.759817	0.266013
			-0.486142	-0.0907834
			-0.187647	0.431696
			0.251469	0.0245712
			-0.177745	0.452044
			-0.278863	0.25641
			-0.387727	0.54761
			-0.206024	0.485861
			-0.202341	0.439794
			-0.304952	-0.291473
			-0.331786	0.491666
			-0.291232	0.530216
			-0.205473	0.221076
			-0.134042	0.10893
			-0.422652	0.513547
			-0.0991992	-0.12007
			-0.462053	0.0872011
			-0.0806494	0.100745
			-0.31053	0.0786881
			-0.220826	0.355805
			-0.18244	0.767851
			-0.268588	0.654508
			-0.354568	0.328057
			-0.448624	0.137088
			-0.241724	0.204638
			0.0975211	0.0334932
			-0.205254	0.315664
			-0.0143918	0.333453
			0.172492	0.902859
			-0.296782	0.157588
			-0.249836	0.401778
			-0.253392	-0.015689
			0.209204	0.0591786
			-0.580735	0.268053
			-0.328909	-0.0485094
			-0.0993042	0.0330641
			-0.102186	-0.05483
			0.388992	0.56555
			0.00256299	0.106701
			-0.0933327	0.527099
			0.34754	0.246072
			-0.263828	-0.000693509
			-0.299116	0.238793
			-0.0509428	-0.0392286
			0.333657	0.0386927
			-0.212879	0.511699
			-0.423227	0.0109163
			0.315629	0.262356
			-0.22066	0.855016
			-0.0579395	0.157689
			-0.127906	0.357278
			-0.502312	0.162033
			-0.535119	0.374112
			-0.123938	0.125119
			-0.511257	0.841685
			-0.19433	0.443701
			-0.567953	0.0144091
			-0.21734	0.442404
			-0.434834	0.481868
			0.00647134	0.0949469
			0.560171	0.365409
			0.231387	0.0784329
			-0.335855	-0.0262461
			-0.283891	0.357016
			-0.118283	-0.149878
			-0.624834	0.0615059
			-0.238671	0.36661
			0.169635	0.600118
			0.00181564	0.03068
			-0.371111	0.519561
			0.103668	0.499741
			-0.354574	0.869068
			-0.293222	0.318156
			0.215551	0.526431
			-0.266458	-0.000804613
			-0.630987	0.099504
			-0.105738	0.0242867
			-0.115888	-0.207063
			-0.672435	0.155962
			-0.384223	0.655227
			-0.717359	0.212439
			-0.189914	0.0653626
			-0.178611	0.287847
			0.395454	0.440795
			-0.621928	0.510201
			-0.126297	0.442562
			-0.211484	0.370311
			-0.111747	0.184739
			-0.225481	0.0880201
			-0.592752	0.0633858
			-0.447672	0.0119162
			-0.256307	0.475624
			-0.165042	0.258525
			-0.368599	0.254155
			0.13782	0.567855
			-0.309849	0.467613
			-0.471898	0.418686
			0.620021	0.257443
			-0.144722	0.461169
			-0.45518	0.388352
			-0.332352	-0.0164246
			-0.359857	0.224193
			-0.488131	0.0309974
			-0.167169	-0.00633483
			-0.544745	-0.0207291
			-0.154789	0.500746
			-0.570624	-0.07414
			-0.199184	0.272598
			-0.562683	-0.0333917
			-0.024884	0.462855
			-0.122054	0.141999
			-0.710104	0.046974
			-0.532883	0.344187
			-0.0726507	0.394191
			-0.249512	0.200087
			-0.085169	0.0105968
			-0.0636298	-0.045489
			-0.148482	-0.034677
			-0.330007	0.0334058
			-0.259199	0.524427
			-0.688537	0.0788475
			-0.318165	0.526186
			-0.204985	0.0165589
			0.0276734	0.433711
			0.40703	0.220603
			-0.0747346	0.345287
			-0.622555	0.246724
			0.131229	0.384776
			-0.305511	0.0920255
			-0.602838	0.0819359
			-0.51747	0.5342
			-0.379182	0.458214
			-0.0270021	0.156552
			-0.492659	0.218999
			-0.344176	0.137719
			-0.340644	0.342462
			-0.364477	0.415261
			-0.374396	-0.0248167
			-0.396151	0.112871
			-0.199518	0.740397
			-0.298737	0.674129
			-0.383545	0.251011
			-0.42246	0.013979
			-0.367151	0.226239
			0.199103	-0.316852
			-0.251684	0.0681222
			-0.327305	0.254642
			-0.335468	0.0660951
			-0.215238	0.337837
			-0.251516	0.580856
			0.127433	0.238247
			0.213812	0.55273
			0.0470135	0.449399
			-0.283846	0.299338
			-0.153306	0.459919
			-0.0507656	0.543244
			0.0796795	0.478688
			-0.0680795	0.69918
			-0.518662	-0.39072
			-0.296875	0.564999
			-0.602992	0.000866586
			0.00195896	0.0988373
			-0.240436	0.591135
			0.0242917	0.125281
			-0.141717	0.244606
			-0.0590565	0.509037
			-0.0514796	0.460869
			-0.173394	0.28341
			-0.211459	0.367821
			0.0747509	0.516431
			-0.426463	0.297914
			-0.00199817	0.192324
			-0.0333675	-0.0962535
			0.0741742	0.0322766
			-0.291532	0.139909
			-0.413845	0.0961802
			-0.062124	0.36593
			-0.133419	0.487874
			-0.200332	0.0246559
			0.00223083	0.0905422
			0.000607688	0.0127392
			-0.508154	0.0127174
			0.066312	-0.106487
			-0.147022	0.02578
			-0.142599	0.22118
			-0.381379	0.43765
			-0.0325212	0.197402
			-0.504932	0.280198
			-0.191461	0.00281088
			-0.294512	0.0564495
			0.0829346	0.0539577
			0.487695	0.0652102
			-0.598054	-0.0167022
			-0.00821454	0.11563
			-0.511889	0.412429
			-0.410591	0.364924
			0.561223	-0.0255903
			-0.417614	0.199032
			-0.319952	0.312103
			-0.288356	0.0907463
			-0.392963	0.602787
			-0.443081	0.212647
			-0.625035	0.544526
			-0.540334	0.309583
			-0.5697	0.14816
[truncated: 39 more rows]

## Sheet: Figure 4C
Figure 4C: Quantification of cells showing A3 relocalization in 3 independent experiments
Left panel: EBV BORF2
	A3A			A3A L1 A3B			A3A L1 A3G			A3Bctd			A3Bctd L1 A3A			A3Bctd L1 A3G
Total cell #	181	110	247	204	208	385	341	271	217	155	135	288	368	393	116	122	362	160
# cells with relocalization	163	92	194	154	154	242	287	222	168	136	114	224	353	373	107	105	298	125
% cells with relocalization	89.8	83.78	78.69	75.29	74.04	62.93	84.07	81.82	77.22	87.78	84.31	77.93	95.8	94.87	92.26	86.35	82.41	78.14
% cells with relocalization (mean)	84.09			70.7533			81.0367			83.34			94.31			82.3
% cells with relocalization (SD)	5.56148			6.80397			3.49154			4.99613			1.83524			4.10611
Right panel: KSHV ORF61
	A3A			A3A L1 A3B			A3A L1 A3G			A3Bctd			A3Bctd L1 A3A			A3Bctd L1 A3G
Total cell #	141	144	267	220	377	381	234	193	114	285	256	120	220	351	101	361	232	134
# cells with relocalization	126	125	189	209	351	292	214	171	84	261	227	93	206	317	75	195	107	92
% cells with relocalization	89.57	87.08	70.74	94.82	93.21	76.67	91.41	88.47	73.3	91.54	88.79	77.72	93.42	90.24	74.59	54.14	46	68.93
% cells with relocalization (mean)	82.4633			88.2333			84.3933			86.0167			86.0833			56.3567
% cells with relocalization (SD)	10.2288			10.0464			9.71892			7.31551			10.0797			11.6246

## Sheet: Figure 4D
Figure 4D: Pearson Correlation Coefficient (PCC) values for GFP channel (indicated A3) and DAPI
Left panel: EBV BORF2 (PCC values)							Left panel: EBV BORF2 (PCC median)							Right panel: KSHV ORF61 (PCC values)							Right panel: KSHV ORF61 (PCC median)
A3A	A3A L1 A3B	A3A L1 A3G	A3Bctd	A3Bctd L1 A3A	A3Bctd L1 A3G		A3A	A3A L1 A3B	A3A L1 A3G	A3Bctd	A3Bctd L1 A3A	A3Bctd L1 A3G		A3A	A3A L1 A3B	A3A L1 A3G	A3Bctd	A3Bctd L1 A3A	A3Bctd L1 A3G		A3A	A3A L1 A3B	A3A L1 A3G	A3Bctd	A3Bctd L1 A3A	A3Bctd L1 A3G
-0.00720299	-0.310849	-0.0433106	0.0722025	-0.101116	-0.65598		-0.201319	-0.226042	-0.260222	-0.110134	-0.221754	-0.213103		-0.231405	-0.23877	-0.0413327	-0.241776	0.473257	0.65141		-0.148156	-0.117694	-0.0719997	0.0724321	-0.115188	0.178687
-0.535151	-0.362487	0.0359403	-0.0801416	-0.444463	0.161023									-0.210996	-0.201432	-0.0559739	-0.0343631	0.0667422	0.632084
-0.346673	0.514769	0.0681269	-0.294037	-0.182791	-0.464058									-0.0578993	-0.171447	0.0165305	-0.208962	-0.239918	0.586756
-0.239156	-0.0493344	-0.111911	-0.0623099	0.221129	-0.518309									-0.0791348	-0.354471	0.031863	0.0466732	0.0805418	0.194502
-0.532289	-0.0794077	-0.314644	0.0097472	-0.277487	-0.0698664									-0.427297	-0.270155	0.346309	-0.247098	-0.148714	-0.473673
-0.21046	-0.191079	0.036183	-0.161372	0.237414	-0.807317									-0.295331	-0.12222	-0.286302	-0.212106	-0.160989	0.346015
-0.190279	-0.623296	-0.297577	-0.116282	-0.0275899	-0.627756									-0.331135	-0.318562	0.500279	-0.29456	0.0978099	0.498366
-0.0038584	-0.116177	0.103625	-0.0503143	-0.256903	-0.566927									-0.254977	-0.454467	0.630892	-0.129823	-0.269489	0.511956
-0.462463	-0.115158	-0.0327779	-0.0808004	-0.209097	-0.355037									0.545632	0.453004	0.341155	-0.140907	0.00185659	0.339317
0.137009	-0.221768	-0.286313	0.104401	-0.0983375	-0.306339									0.179018	0.484578	-0.239248	-0.165255	0.306509	0.64566
-0.401055	-0.264539	-0.0782638	-0.488007	0.0447801	-0.680194									-0.344457	-0.396095	0.473641	-0.0618684	0.405532	0.416981
0.126379	-0.285804	-0.179637	-0.250201	-0.080386	-0.554341									-0.479392	0.696809	-0.0212799	-0.168773	-0.068878	0.0458905
-0.318684	-0.474743	0.711901	0.255059	-0.524226	-0.482997									-0.280806	-0.431405	0.296604	-0.288647	0.0929039	0.346713
0.388029	-0.115412	-0.0922012	0.215131	-0.0354633	-0.327108									-0.385402	-0.323718	0.132745	0.0269135	0.510234	0.131106
-0.201919	-0.188915	-0.112601	-0.015613	-0.504917	-0.845405									-0.0333555	-0.0798461	0.516401	0.33209	0.0649603	-0.281071
-0.360188	-0.107525	-0.557743	-0.24518	-0.100448	-0.335012									-0.226381	0.17513	-0.121023	0.342032	-0.177257	0.0509803
-0.045053	-0.398819	-0.0769916	-0.0769667	0.239981	-0.00943351									-0.219897	0.46671	-0.272458	0.307534	-0.305973	0.282775
-0.251874	-0.373594	-0.658192	0.102414	-0.0316934	-0.377554									-0.16384	-0.138553	-0.13893	0.103241	0.0734648	0.431944
-0.19576	-0.390872	-0.246281	0.00390604	-0.204629	-0.324198									-0.238059	0.366883	0.0831712	0.128065	-0.233174	0.575158
-0.0208536	0.063791	-0.205488	-0.040375	-0.127281	-0.1892									-0.228068	-0.31655	-0.0938964	-0.0112405	-0.215583	0.646093
-0.230448	0.0826786	0.0452797	-0.304236	-0.07847	-0.748388									-0.285255	-0.381515	-0.256279	0.0855694	-0.225563	-0.212696
-0.241301	-0.0109138	-0.291788	-0.0753049	-0.775344	-0.476641									0.353931	-0.115272	0.174865	-0.142841	0.165458	0.224031
-0.435462	-0.210819	0.187907	0.0626629	-0.621926	-0.302571									-0.363765	0.229653	-0.19954	-0.00364861	0.220311	-0.290956
0.0643211	-0.605786	-0.281919	-0.314523	0.366301	0.0374564									-0.375777	-0.209265	-0.407839	0.0515276	0.404422	0.303988
-0.247521	-0.313638	-0.183754	-0.198854	-0.330075	-0.426171									-0.212577	-0.367755	-0.0194108	-0.442729	-0.117332	-0.143315
-0.115252	0.0188948	-0.533631	0.156104	-0.474019	-0.535011									-0.0875262	-0.416693	-0.447253	-0.254264	0.155845	0.264402
-0.404653	-0.353685	-0.426077	-0.261839	0.192836	-0.684935									-0.224951	-0.255352	0.227818	-0.130644	-0.139986	-0.0204635
-0.000651776	-0.26361	-0.515315	-0.254926	-0.33159	-0.654727									-0.19234	-0.259468	0.0306259	-0.143442	0.172361	0.364167
0.00110252	-0.148297	-0.314851	0.308799	-0.580066	-0.285363									-0.21619	0.134144	-0.122311	0.0454602	-0.240932	0.25207
-0.337854	0.100521	-0.389246	-0.457659	-0.0996001	-0.240979									-0.141884	-0.168593	0.0662647	0.00144656	0.377089	-0.586398
-0.288348	-0.370671	-0.414333	-0.0830034	-0.213236	-0.432386									-0.277085	-0.4485	0.173332	0.107484	-0.179825	0.548475
-0.381794	-0.23432	-0.347425	0.220195	-0.269973	-0.26076									-0.379273	-0.448062	0.170111	-0.11246	-0.192884	0.210431
-0.348635	-0.387624	-0.107356	-0.0355507	-0.309533	-0.550344									-0.0679545	0.0572806	-0.279016	0.293547	0.0350545	0.0343677
-0.239801	-0.13235	-0.345422	-0.0753525	-0.343402	0.136775									-0.418035	0.0233762	0.0899474	-0.0916219	-0.350308	-0.00721171
-0.338077	-0.206279	-0.283383	-0.113891	-0.544554	0.05244									-0.343224	0.117068	-0.107682	-0.261074	0.632559	0.103119
0.767148	-0.209968	-0.309443	-0.132535	-0.37738	-0.548778									-0.465143	0.291633	-0.238555	0.0259759	-0.181475	-0.242538
-0.448716	-0.0141685	0.110409	-0.441564	-0.415674	0.0989897									0.553593	-0.23363	-0.0791507	0.1225	-0.148844	0.00740737
-0.296525	-0.224648	-0.0851663	0.448187	-0.317052	-0.237734									-0.430312	-0.356978	0.166122	0.597929	-0.0781886	0.14605
-0.571086	0.329035	-0.465355	0.00503401	-0.138086	-0.0612709									-0.333196	0.100922	-0.116603	-0.380661	-0.255173	0.123288
-0.123495	-0.173936	-0.268532	0.248686	-0.185326	-0.263051									0.0140449	-0.379942	-0.00833847	0.0206764	-0.53067	0.335185
0.185055	0.545745	0.238312	-0.345481	-0.725604	-0.293417									-0.465209	-0.351232	-0.315307	0.327412	0.258825	0.332465
-0.226526	-0.256908	-0.392268	-0.382328	-0.393443	-0.373232									-0.286677	-0.333087	0.639598	-0.0194191	-0.349792	0.543792
-0.545375	-0.497695	0.10876	-0.061304	-0.362426	-0.11962									-0.595191	0.117993	-0.00651351	0.0219388	-0.267332	-0.415065
-0.252844	-0.155269	0.266778	-0.161883	-0.482367	-0.559506									-0.321182	0.035389	0.10399	-0.0672604	-0.272364	0.389903
-0.331543	-0.56038	-0.251299	0.236039	-0.53381	-0.498423									-0.0302421	-0.0375897	-0.129045	0.131523	-0.289953	0.500561
-0.0268422	-0.329265	-0.340214	-0.0661522	-0.480175	-0.209283									-0.0234364	-0.0883345	0.589823	-0.143068	-0.432446	-0.0461175
-0.361723	-0.461155	-0.156732	-0.16263	-0.18571	-0.65797									0.00201088	-0.162322	-0.34682	0.245389	-0.412201	0.301389
-0.619921	-0.0536355	-0.455902	-0.608773	-0.77324	-0.266025									-0.291525	0.323384	-0.435506	0.164252	-0.263153	-0.0594254
0.0104991	-0.532658	-0.216734	-0.340462	-0.130722	-0.506201									-0.43335	0.0648344	-0.0833845	0.527853	-0.248672	0.103188
-0.267686	-0.149709	-0.363382	-0.219332	0.352407	-0.367586									0.118871	0.341587	0.127457	-0.3815	-0.0791395	-0.210123
-0.659896	-0.0215273	-0.256834	0.0140243	-0.599016	-0.621276									-0.491202	-0.427201	-0.374144	-0.265937	-0.275405	0.381485
-0.429095	-0.073645	-0.220493	0.526509	-0.420844	-0.545592									-0.0665709	0.550583	0.0352852	0.909284	0.0684929	-0.30623
0.00741106	-0.00933938	-0.0309974	-0.33982	-0.837086	0.133									-0.309928	-0.37259	-0.205945	0.015265	-0.0732136	0.599202
-0.185768	-0.276045	0.0169763	0.275006	-0.0575208	0.183333									0.466504	-0.379404	-0.215739	0.222413	-0.225508	0.475744
-0.269153	-0.241515	-0.429397	-0.319799	-0.0308897	-0.132996									0.552996	0.155386	-0.295734	0.632127	-0.392229	0.0866359
-0.0866198	-0.269679	-0.313776	-0.0210264	-0.00278182	-0.358695									0.401223	-0.527829	-0.0118438	0.221172	-0.346354	0.624571
-0.33693	0.0109931	-0.0240754	0.0629357	-0.332738	-0.208905									-0.28758	-0.38218	-0.392998	0.369276	-0.326597	0.49702
-0.127499	-0.173344	-0.495448	-0.143921	-0.269783	-0.145545									-0.208625	0.473067	-0.115582	0.650632	0.700714	0.487744
-0.42481	0.125132	-0.278518	-0.349188	-0.608824	-0.362665									-0.437523	-0.50432	-0.333272	-0.13152	0.609667	0.273684
-0.377037	0.059755	-0.383772	0.163826	-0.263813	-0.108631									-0.348018	0.432888	0.424273	0.222216	0.30794	0.474708
-0.462865	-0.345254	-0.232425	-0.456218	-0.172038	-0.24903									-0.022189	-0.356454	-0.335656	-0.0177132	-0.0902712	0.411962
-0.0111142	0.26845	-0.570246	0.157384	0.261624	0.158223									-0.21583	-0.349175	0.119806	0.182033	-0.188897	-0.45963
-0.0159554	-0.121373	-0.39347	0.198328	0.164916	-0.112723									-0.172361	-0.246385	0.0240565	0.412111	0.0422458	-0.208752
-0.410377	-0.371297	-0.380008	0.595067	0.0957985	-0.642401									-0.206915	-0.0450709	0.131196	0.162377	0.240435	0.335421
-0.463793	-0.0655614	-0.355406	-0.334742	-0.613233	-0.225675									-0.224529	0.101138	-0.0178749	-0.0768702	-0.125502	0.513226
-0.282301	0.104959	-0.231501	-0.00942714	0.0943385	-0.417932									-0.255666	-0.246893	-0.00670049	0.291628	-0.124245	0.116804
-0.719591	-0.198269	-0.700291	0.285414	-0.309568	-0.222155									-0.369207	-0.211402	-0.415755	0.545376	-0.179724	-0.148438
-0.40285	-0.17923	-0.13805	-0.527225	-0.094672	-0.45081									0.0722831	-0.387041	0.177494	0.0245882	-0.354305	-0.0531682
0.063824	-0.311355	-0.168117	0.450244	-0.167144	-0.626227									-0.0317183	0.108779	0.446669	0.069663	-0.0971544	-0.0423632
-0.140981	-0.188543	-0.386256	-0.149241	-0.378331	-0.0831525									0.366618	-0.2985	-0.295971	-0.226291	-0.192332	-0.0130902
-0.281241	-0.155194	-0.323628	-0.410944	-0.388419	0.0837519									-0.474566	-0.307635	-0.325027	0.0596184	-0.23208	0.319759
-0.202775	-0.266365	0.276867	0.184728	-0.513373	-0.550942									0.278679	-0.0848048	-0.41015	0.0757345	-0.374074	0.417797
0.170557	-0.202407	-0.682404	-0.208446	-0.150743	-0.361554									-0.284204	-0.239946	-0.0352415	0.275927	0.210761	0.727125
0.325268	-0.764107	-0.561692	0.653727	0.455999	-0.242464									-0.441732	0.337191	0.614184	0.244082	0.33517	0.410741
0.0407714	-0.509871	-0.396834	-0.0543582	0.329573	-0.539475									-0.424274	-0.0599903	0.615666	0.379563	-0.282026	-0.0805521
-0.479133	0.285205	-0.84831	0.164492	-0.56231	-0.299017									0.158437	-0.0861056	0.371518	0.476419	0.0117184	-0.0241601
0.06196	-0.608687	-0.145939	0.614139	-0.100594	-0.562326									-0.162251	-0.377559	-0.526751	0.361401	0.195528	0.00747097
-0.375057	0.0502633	-0.514273	-0.184084	-0.747713	-0.396434									-0.265909	0.517205	0.551462	-0.0266837	0.033227	-0.158447
-0.0787133	-0.296483	-0.417719	0.280884	-0.605514	-0.10069									-0.396975	-0.0456935	-0.396975	-0.199646	-0.318811	0.285758
0.0280837	-0.230421	-0.561926	0.396482	0.028614	-0.117358									-0.12246	0.467058	0.49186	0.120506	0.037538	0.202733
-0.128609	0.0446039	-0.492653	0.555161	0.0453639	-0.662233									-0.419968	-0.100641	-0.410673	-0.0820699	-0.312181	0.278963
-0.43836	0.398404	-0.428651	-0.547364	-0.721022	-0.0299372									0.0862426	-0.238704	0.601428	-0.105416	-0.208469	0.00335368
-0.15105	-0.025476	-0.356246	0.364869	-0.543083	-0.0725684									0.274755	-0.344027	-0.0538128	0.0769321	-0.0581323	0.277072
-0.154085	-0.564571	-0.55644	-0.193637	0.612047	-0.0109505									0.220626	-0.222203	-0.3665	0.0519634	-0.0694078	0.400008
0.656291	0.0355359	-0.516589	-0.0127728	-0.112783	-0.291354									-0.202854	-0.148338	-0.685795	0.0722606	0.102417	0.209792
-0.0159921	-0.102017	-0.206328	-0.532799	-0.104023	-0.0423315									-0.200001	0.539217	-0.494387	0.189221	-0.189756	0.242239
0.0811788	-0.230681	-0.695361	-0.450926	-0.310983	-0.205776									-0.50265	-0.378545	0.586671	-0.146114	-0.195842	0.0101922
-0.412636	0.017284	0.449879	0.342387	-0.148123	-0.589914									0.0423852	0.699696	-0.0676005	0.0598237	-0.0110537	0.224587
-0.0870219	-0.436106	-0.399728	-0.38023	-0.427435	-0.43576									-0.311551	-0.249727	0.370692	-0.126164	-0.198099	0.302125
-0.0989371	-0.171074	-0.450485	-0.0168751	-0.196393	-0.097107									0.0311851	-0.221965	-0.591574	-0.186256	0.0351442	0.523695
-0.265646	-0.0544739	-0.659887	-0.735361	0.448251	-0.123015									-0.230652	-0.0559965	-0.232813	0.338903	0.0278892	0.361655
-0.491325	-0.37764	-0.319871	0.460156	0.170781	0.253767									-0.0486273	-0.171766	0.0623556	0.0641943	0.313596	0.14377
-0.143201	-0.273037	-0.0580139	0.561503	-0.695024	-0.319999									0.396413	0.133089	-0.719947	0.0341893	-0.361345	0.135666
0.00875928	-0.188954	-0.500214	-0.405568	0.0291492	-0.22259									-0.239821	-0.215287	-0.747228	-0.447059	0.145575	0.598946
-0.402439	-0.45569	0.0844885	-0.453222	-0.036394	-0.119547									-0.30717	-0.342086	-0.259617	0.258994	-0.0593234	-0.0588031
-0.454615	-0.719957	0.290435	0.438769	-0.148444	-0.104236									-0.177363	-0.0891024	-0.241007	-0.0910373	0.0621331	0.208172
-0.295533	-0.025991	-0.0831368	0.389319	0.030717	-0.339892									0.19369	0.0741764	-0.466968	-0.133932	-0.0213465	0.379295
0.0478827	-0.350232	-0.544667	-0.416344	-0.143234	-0.506795									-0.108828	-0.249151	-0.212227	0.328841	0.345283	0.323415
-0.276501	-0.303252	-0.0734718	0.173778	0.0201426	-0.586966									0.17598	0.00233946	-0.0173714	0.43722	0.194946	0.140296
-0.19094	0.0148153	-0.103837	-0.0572039	0.0454931	-0.36658									0.270734	0.375803	-0.592859	-0.172526	-0.0121587	0.61415
-0.343585	0.194598	-0.484	0.777785	-0.389682	0.00210329									-0.407999	-0.404844	-0.242638	-0.197205	-0.0775908	0.162429
-0.173781	-0.319755	-0.265413	0.414672	-0.224833	-0.325329									0.053199	-0.000588641	-0.602692	-0.0147042	-0.146172	0.022531
-0.175476	-0.195902	-0.464736	-0.311974	-0.393035	-0.662159									-0.0184734	0.293787	-0.157717	-0.105926	0.720325	0.0721936
0.0443145	-0.116307	-0.6901	0.525307	-0.240886	-0.302696									0.0449519	0.0115952	0.21201	-0.236017	0.382943	0.0320768
-0.0678784	0.160997	-0.588592	-0.426368	-0.704711	-0.132267									-0.292931	0.321639	0.3101	0.0101437	0.12754	0.0777061
-0.0374122	0.0240281	-0.253186	0.234853	-0.499548	0.0718492									-0.114881	-0.360657	0.0404045	0.241628	0.130115	0.475742
0.27304	0.288824	-0.644563	-0.0750234	0.355156	-0.542688									0.337966	-0.440509	0.134377	0.0963422	0.0871591	0.509464
-0.141284	-0.193599	-0.760697	-0.355436	-0.141625	0.360593									-0.102388	-0.126893	-0.283542	-0.215106	0.693104	0.118296
0.0727206	0.0736831	-0.320411	-0.0998373	-0.397158	-0.360362									0.219249	-0.325553	-0.169519	0.266908	-0.138888	0.606514
-0.319544	-0.197636	-0.33432	0.451785	-0.415627	-0.309965									-0.508285	0.216932	0.058726	-0.229271	-0.0928366	0.508792
-0.28531	-0.402765	-0.335306	-0.451965	-0.427906	-0.443884									-0.447933	-0.151096	0.0721869	0.032943	0.280849	0.148711
-0.305967	-0.0792102	-0.552891	-0.204167	-0.105501	-0.375713									0.0290449	-0.241889	-0.119435	0.311981	0.141221	0.533773
-0.0824393	-0.392321	-0.636951	-0.412599	-0.286409	-0.10089									-0.361503	-0.454572	0.0102214	-0.0444207	-0.0857276	0.623593
-0.337932	-0.101388	-0.398468	-0.409688	-0.240797	-0.418198									-0.407887	0.62513	0.174903	-0.18037	-0.378808	0.492561
-0.415579	-0.154074	-0.486343	-0.195922	-0.389587	-0.0638187									-0.256675	-0.203766	-0.266306	0.263836	-0.294726	0.449251
-0.162376	-0.516382	-0.234714	-0.891205	0.060587	-0.00797057									0.102247	-0.420925	-0.205636	0.229465	-0.188867	-0.219761
-0.176999	-0.423662	-0.292363	-0.0955903	0.3324	-0.351487									0.0121562	-0.154509	0.475799	-0.253075	-0.214694	0.290576
0.30406	0.0108992	-0.13723	0.0761818	0.325394	-0.342717									0.502477	-0.306859	-0.0875922	-0.291623	-0.250538	-0.104392
-0.0662793	0.265248	-0.23335	0.0516505	-0.126721	-0.310966									-0.277996	-0.385715	0.500549	-0.32838	-0.0509156	0.434965
-0.293728	0.125452	-0.181966	-0.0340068	-0.0218244	-0.0989264									0.265242	-0.46305	0.510713	0.00656082	-0.191158	0.583856
-0.234834	-0.0639217	-0.522216	-0.0403248	-0.477324	0.0838163									-0.172721	-0.271162	-0.492314	0.245957	0.00931204	0.720766
-0.280615	-0.311953	-0.110829	-0.368821	-0.475135	-0.32259									-0.362844	-0.333901	-0.221895	-0.362216	-0.256753	0.215861
-0.40861	0.114519	-0.446773	-0.0710353	0.106328	-0.13861									-0.120083	-0.404917	0.0152663	0.00458799	-0.0769994	0.250276
0.0948226	-0.481778	-0.454583	0.232026	-0.506357	-0.411184									-0.384638	-0.240637	-0.199546	0.318101	-0.0198251	0.2807
0.411657	-0.411283	0.196035	-0.471945	0.252252	-0.435644									-0.011793	0.202205	-0.178362	0.0840679	-0.417269	0.475975
-0.182774	-0.558904	-0.119907	-0.423433	0.133154	-0.139874									0.201686	-0.505121	0.482371	0.022429	-0.0320244	-0.477844
-0.251845	-0.645484	-0.658654	-0.167751	-0.773826	-0.383954									-0.00848169	0.127801	-0.173942	0.18308	0.089096	-0.263033
0.427096	-0.382155	-0.292265	-0.325688	0.158407	-0.850927									-0.0135534	-0.190358	0.119358	0.230816	0.40785	0.351324
-0.314753	0.106917	-0.477635	-0.125946	-0.241838	-0.412395									0.400794	0.497519	0.393623	0.149367	-0.271021	0.224331
-0.296146	0.0224945	-0.0110668	-0.421816	-0.334604	-0.342353									0.528738	-0.416856	0.0391081	-0.0338876	-0.548881	-0.0215591
-0.612183	-0.14502	-0.639208	-0.192477	-0.238478	-0.538935									-0.421339	0.371219	0.350744	0.262042	-0.16232	0.451972
-0.150916	-0.0640855	-0.822183	-0.35163	-0.220801	-0.15656									0.442191	-0.456308	-0.0273633	0.181331	0.0676136	0.409663
-0.741239	0.0366548	-0.266204	0.207418	-0.750947	-0.332982									-0.112389	-0.0251165	-0.449508	0.261139	-0.3899	0.67591
-0.244238	0.0754297	-0.029897	-0.0775468	-0.0866126	-0.264996									-0.12651	0.423524	-0.0636291	-0.299466	-0.230675	0.238086
-0.152277	-0.381153	-0.252042	-0.241599	0.0880549	-0.37262									-0.133771	-0.340801	-0.132539	0.158495	-0.339798	-0.353893
-0.266925	-0.255591	-0.399106	-0.405174	-0.706494	-0.411823									-0.103811	-0.183914	-0.314149	-0.428637	-0.327921	-0.380014
-0.0735423	0.29058	-0.186631	0.0626128	-0.336732	-0.361723									0.076289	-0.200609	0.198274	-0.0272547	0.220718	-0.334961
-0.303256	0.161574	-0.52995	-0.268508	-0.112927	-0.593911									-0.116592	-0.49475	0.171021	-0.133589	0.463927	0.0432381
-0.549922	0.208998	-0.556197	-0.201383	-0.185813	-0.0384242									-0.073563	-0.356619	-0.0747206	0.0901716	-0.312206	0.533428
0.175451	0.107227	-0.0294588	-0.25215	-0.111926	-0.343266									-0.0839323	-0.213549	0.164068	-0.258307	-0.614172	0.0533924
-0.297193	-0.0595041	-0.166038	0.0655367	-0.244818	-0.817143									-0.077209	0.24275	-0.0466064	-0.256957	-0.209526	0.537895
0.0960215	-0.294195	-0.147233	-0.313401	-0.418771	-0.156865									-0.193843	-0.183064	-0.211404	-0.0610424	-0.0690613	-0.168105
-0.375165	-0.442725	-0.370734	0.352067	-0.40806	-0.316501									-0.148974	0.13563	0.315355	-0.179469	-0.0562709	-0.249177
0.0116637	-0.0493395	-0.383012	-0.322106	-0.0254002	-0.491767									0.0958581	-0.26135	0.740185	0.690968	-0.420641	0.677027
-0.0508285	-0.274325	-0.683115	0.117867	-0.0167719	-0.163387									-0.525445	0.04502	0.110306	0.117014	-0.455167	-0.234127
-0.259169	0.0341474	0.0709004	-0.616351	-0.0623324	-0.387082									-0.0038389	-0.368127	0.102883	-0.0112479	-0.478792	-0.0307809
-0.349916	0.0770282	-0.0776954	-0.256734	0.107899	-0.162626									-0.329145	0.0922345	0.586956	0.582124	0.0598424	-0.239261
-0.429568	-0.510545	-0.219756	-0.092942	-0.062071	-0.462733									-0.275547	-0.352079	0.33994	-0.0339719	0.193869	0.530049
-0.195685	-0.315778	-0.169013	-0.291644	-0.370031	0.138231									0.00805219	0.372207	-0.154333	0.198264	0.294022	0.480653
0.0793577	-0.232776	-0.0595896	-0.46454	-0.0788851	-0.711794									0.0706921	-0.277013	-0.160525	-0.00496387	-0.0289327	0.739325
0.00150974	-0.180064	-0.414764	-0.106273	-0.410016	-0.677408									-0.0972479	-0.305639	-0.130846	0.698318	0.311847	0.475146
-0.0319742	-0.36902	-0.429634	-0.331753	-0.0104339	-0.600033									0.525979	-0.294605	0.172163	-0.0669015	-0.359928	-0.116962
-0.557834	-0.441538	-0.103442	0.265904	-0.223369	-0.161007									-0.421046	0.495707	0.0772457	-0.0735585	-0.51963	0.700621
0.363318	-0.292137	0.0973946	-0.317591	-0.283285	0.213032									0.316796	-0.339885	-0.300382	-0.0822811	0.0948277	0.00754191
0.341332	-0.0848732	-0.619366	-0.470026	0.0635529	-0.17439									-0.00375926	-0.253877	-0.121249	0.355686	0.424274	-0.122887
-0.610849	0.119743	-0.510039	0.0816933	0.00344627	-0.313519									0.327774	0.407608	0.183411	0.216487	0.102202	0.616516
-0.00129063	-0.154216	-0.493343	-0.286176	-0.373631	-0.0133613									-0.182297	0.187111	0.471028	-0.187272	-0.303008	-0.110929
-0.0895002	-0.32507	-0.452826	0.155908	-0.204029	-0.431273									0.298336	-0.148755	0.102225	-0.0542911	-0.0928076	0.756893
-0.053065	-0.340103	0.458626	-0.579115	-0.140345	-0.0919581									0.324133	-0.139581	0.284823	0.0621585	0.00403744	0.315243
-0.243345	0.0558115	0.222787	-0.0782127	-0.242433	0.328148									-0.581737	-0.160294	0.486945	-0.366689	0.166924	0.656102
-0.415041	-0.333779	-0.44965	0.0783365	-0.3465	-0.206067									-0.175029	-0.444827	-0.2215	-0.0750141	-0.367698	0.476265
0.496664	-0.227823	-0.0406368	0.0339247	-0.205698	-0.568147									-0.127057	-0.166656	-0.27011	-0.0798183	-0.118893	0.609151
0.126355	-0.166446	-0.623317	-0.104088	0.340764	-0.484832									-0.396484	-0.0354888	0.492009	-0.318959	0.0882188	-0.19846
-0.240765	-0.0989862	0.205238	0.377867	-0.233976	-0.540047									0.00480984	-0.312774	0.642832	-0.151432	0.235791	0.465297
0.163716	0.049704	-0.32094	0.273256	-0.461296	0.0465543									-0.190998	-0.430483	0.0473703	0.130277	-0.00963358	0.0763787
-0.515464	-0.347513	-0.693742	0.563266	0.0892391	-0.517819									-0.0906263	0.472751	-0.358285	0.121747	0.046581	0.203194
-0.364039	-0.385072	-0.489389	-0.173165	-0.320707	-0.669757									0.361187	-0.200511	-0.180538	0.233629	-0.309984	0.342678
-0.248852	-0.282662	-0.600006	0.23908	-0.322797	-0.141208									-0.00667027	0.0309013	-0.181202	0.330291	-0.246622	0.656258
-0.345025	-0.129354	-0.0398913	-0.0707499	0.0716076	-0.252589									-0.0674761	-0.149379	0.244106	-0.0286062	0.413938	0.599968
0.074378	-0.37681	-0.188797	-0.316423	-0.0241169	0.334389									-0.0877675	-0.130938	-0.412915	0.129438	0.76807	0.461632
-0.572387	-0.12235	-0.594839	-0.364071	0.352781	-0.502136									0.673244	-0.416554	-0.0339138	0.183143	-0.257583	0.506781
-0.297433	-0.248711	-0.457227	-0.0197471	-0.244464	0.518374									-0.188969	-0.418563	-0.528433	-0.514931	-0.533425	0.0926787
-0.370379	0.0316546	-0.0993218	0.438676	-0.19286	-0.0818605									-0.0460614	0.283336	-0.396378	-0.160157	0.211166	0.609944
0.256481	-0.445877	-0.0850438	-0.125962	-0.0964434	-0.314339									-0.0734496	0.247459	0.381116	0.462453	0.157743	0.590428
0.371962	-0.124106	0.0115999	0.495217	0.0457672	-0.460954									-0.225807	-0.344359	-0.522336	0.256062	-0.502921	0.237839
-0.1376	-0.368498	-0.432029	-0.173133	-0.153304	-0.475171									-0.339284	-0.0697875	-0.346869	0.429544	-0.30002	0.145078
-0.332206	-0.490263	-0.0492333	0.144012	-0.338216	-0.419822									0.511662	-0.0507435	-0.256852	0.130312	-0.319428	0.328871
-0.131678	-0.573377	-0.458811	0.0202289	-0.357493	-0.496609									-0.352159	-0.14722	-0.0451928	-0.0640163	-0.259119	-0.0831783
-0.497481	-0.748656	-0.421161	-0.075148	-0.204788	-0.0359112									-0.227938	-0.113392	-0.186848	-0.513616	0.408199	0.397784
0.122643	-0.0491616	-0.478509	-0.0596523	-0.563619	0.0205948									-0.121637	-0.134475	-0.187225	-0.17338	-0.0823526	0.153393
-0.134542	-0.320912	-0.353972	0.231106	-0.39777	-0.362067									-0.342273	-0.0997707	-0.189828	0.00721122	0.153107	0.569905
-0.0804259	-0.676415	-0.218864	-0.313498	-0.648031	-0.289413									-0.329906	-0.136041	-0.0205095	0.314752	0.00912312	0.0929163
-0.0652103	-0.23833	-0.320152	0.669851	0.0078921	0.320526									-0.146494	0.160997	0.380886	0.438822	0.366783	0.550084
-0.204514	-0.379373	-0.361924	0.387733	-0.171436	-0.211308									-0.129019	0.0946156	-0.200836	-0.119021	0.438119	-0.561834
-0.229899	-0.250336	-0.17894	-0.108103	0.328412	0.0969955									0.445929	0.263989	0.152628	0.457735	-0.187172	-0.0114299
0.17157	-0.239393	-0.128096	-0.254097	-0.585519	-0.393905									-0.377457	-0.0510904	-0.2645	-0.330867	-0.151439	0.0825283
0.499614	-0.378556	-0.653391	0.010038	-0.13585	-0.531456									-0.15903	-0.0172185	0.549386	-0.354234	-0.307308	-0.498085
-0.519944	-0.159138	-0.464041	0.3321	-0.42614	-0.370118									-0.322301	0.219687	0.318583	0.119474	0.636562	0.676139
-0.534789	-0.428669	-0.165739	0.04806	-0.542669	-0.307551									-0.119528	0.124251	0.0109556	-0.360634	0.196199	0.110539
0.12633	-0.214921	-0.145019	0.18253	0.0157317	-0.0741064									-0.224611	0.300807	0.391645	-0.263122	0.300421	-0.140386
-0.412977	-0.331115	-0.375183	0.22308	-0.121576	-0.431589									-0.066943	-0.413975	0.287329	0.253297	0.0687569	0.143119
-0.651431	-0.55282	-0.300274	-0.386019	0.0965172	-0.353599									0.292382	-0.238452	0.20863	0.113274	0.0788502	0.31702
-0.0311706	-0.282664	-0.482809	-0.227224	0.0218294	-0.107864									-0.113472	-0.210899	-0.187723	0.696542	-0.115188	-0.206195
-0.0451234	-0.0739533	-0.254059	-0.300182	-0.0162143	-0.340085									-0.289571	0.484037	0.32542	-0.373204	-0.338048	0.342446
0.393823	-0.359665	-0.210537	-0.0530543	-0.549693	-0.521541									-0.390401	0.00509682	0.247188	0.0776304	-0.369053	-0.403567
0.137181	-0.249863	-0.404425	0.036115	-0.161152	-0.350189									0.369633	0.0453905	0.484169	0.0244461	0.0340661	-0.129262
-0.546792	-0.138848	-0.597082	-0.363721	-0.15485	-0.410119									0.00434171	0.611024	-0.213795	-0.110845	-0.0683731	0.53772
-0.213602	-0.333736	-0.353167	-0.0451392	0.00923019	-0.448301									-0.070177	-0.222196	0.0107775	0.157269	0.287298	0.350884
-0.189205	-0.3772	-0.431377	-0.219483	-0.165486	0.45252									-0.00489273	0.158034	-0.358137	-0.360944	0.270577	-0.0264274
-0.147787	-0.434983	-0.754815	-0.429126	-0.0245842	-0.490049									-0.23091	0.402458	0.681741	0.415515	0.27139	-0.0529991
0.115854	-0.339825	-0.217624	-0.145907	0.174585	-0.515656									-0.0784052	0.558496	0.161934	0.0589714	-0.182765	0.347389
-0.08602	-0.267511	-0.49621	0.668112	-0.317577	-0.311543									-0.277061	-0.166388	0.376827	0.306558	-0.116975	0.143972
-0.540575	0.349041	-0.0829646	0.168238	-0.351861	-0.428799									-0.201669	-0.269305	-0.152128	-0.276339	-0.279039	0.427313
-0.427973	-0.22238	0.675552	0.0552011	0.137423	-0.575957									-0.385172	-0.254031	0.190387	0.39337	-0.299794	0.0120328
-0.222409	-0.168763	-0.747444	-0.15174	-0.274762	-0.604101									-0.189698	-0.167485	-0.195484	0.34324	0.122811	0.477404
-0.122639	-0.460842	-0.431967	0.369785	-0.487797	-0.060324									-0.18738	-0.246304	0.119227	0.576293	-0.0523927	-0.200044
0.28709	-0.356013	-0.523668	0.0548344	0.225723	-0.480935									-0.200479	-0.350517	-0.0123099	0.629831	-0.0229567	-0.0650959
-0.309182	-0.244548	-0.334228	0.0219413	-0.517352	-0.273605									-0.261948	-0.171233	0.10233	0.270184	-0.067047	-0.0872763
-0.181615	-0.669285	-0.484493	-0.268197	-0.24061	-0.371754									0.172502	-0.00271562	0.0688292	0.20609	0.0251506	-0.00494502
0.24369	-0.360461	-0.179024	-0.070664	-0.286498	-0.284344									-0.271843	-0.0398827	-0.763196	0.202749	-0.372805	-0.0382605
0.412867	-0.41445	-0.206004	-0.184766	-0.069508	-0.227777									0.0319564	-0.258709	0.0964493	0.297758	0.140164	0.409862
-0.200424	-0.266994	-0.300823	0.420627	0.747495	-0.333149									0.782188	0.0869732	-0.183496	-0.12527	-0.000849014	0.16204
-0.318821	-0.298023	-0.60935	-0.456979	-0.365988	-0.30303									-0.258052	-0.133204	0.176422	-0.185687	-0.275712	0.506489
-0.319303	-0.172896	-0.273608	-0.188381	0.288906	0.0585618									0.0545301	0.018458	-0.0947042	0.0632203	-0.0854748	0.547818
0.189292	-0.411982	-0.278792	-0.214637	-0.0948633	-0.240341									-0.241341	0.0204955	0.570878	-0.000476274	0.716029	0.420948
-0.40742	-0.430353	-0.261629	-0.0343635	-0.152959	-0.301418									-0.132733	-0.0839428	-0.176521	0.361512	-0.280423	0.263533
-0.313212	-0.0655944	0.024399	0.236691	0.672581	0.0359095									-0.0612404	-0.109025	-0.293623	0.229802	0.0970531	0.492755
0.235619	-0.323955	-0.00125417	-0.453702	-0.198103	-0.161514									-0.127338	0.0964689	-0.269892	-0.0683779	-0.198897	0.13317
-0.356693	0.403594	-0.255464	-0.390921	-0.144483	-0.58725									0.35541	-0.131974	-0.457153	0.0225446	-0.334896	-0.069797
-0.264378	-0.0607276	-0.46678	-0.357522	-0.0789532	-0.228836									-0.328369	0.24616	-0.523759	0.0425219	-0.329868	0.0140356
-0.459347	-0.382653	-0.310273	0.104408	-0.0230498	-0.359253									0.729519	0.15126	-0.148921	-0.075845	-0.048592	-0.181411
-0.140947	-0.24825	-0.180998	-0.24622	-0.223708	-0.351973									0.0254639	0.682238	-0.0463221	-0.0736414	0.384656	-0.243541
-0.363632	-0.467452	0.220644	-0.0954457	-0.620546	0.0880467									-0.316466	-0.0999746	0.149595	-0.0661667	-0.101418	-0.40867
-0.30576	-0.17546	-0.387533	-0.40563	-0.448425	0.0247805									-0.0292215	-0.351085	0.0330113	-0.00520141	-0.138171	-0.0976464
-0.238588	-0.301434	-0.652028	-0.017554	-0.478938	-0.273561									-0.28733	-0.157984	-0.0457448	-0.281557	-0.207901	0.0805669
-0.173888	-0.328002	-0.572892	-0.0640514	-0.134912	-0.549066									-0.184366	0.270461	0.109666	-0.0583692	0.298279	-0.152102
-0.0189539	-0.0644618	-0.538764	-0.746906	-0.298601	-0.346298									0.0829596	-0.311203	-0.205019	-0.222126	-0.202781	0.567514
-0.0611283	-0.168371	-0.540525	0.090732	-0.378102	0.372478									-0.202452	0.2241	-0.366864	-0.0582108	-0.057215	0.684675
-0.15665	-0.387957	-0.157077	-0.0486125	0.182723	-0.130166									-0.144045	-0.100046	-0.166941	-0.275895	0.1597	0.325345
-0.168295	-0.135651	-0.209568	-0.0879793	-0.372587	-0.256967									0.0969815	-0.181378	0.344795	0.016814	-0.322327	-0.0012363
-0.0596355	-0.40463	0.51475	0.602945	-0.427093	-0.212774									0.01304	0.317704	-0.142718	0.189445	-0.361462	0.178635
0.0287253	-0.281542	-0.359234	-0.240755	-0.13689	-0.584105									0.101656	0.380617	-0.258618	-0.216016	0.0561355	0.283386
0.197498	-0.349518	-0.42489	-0.0743976	-0.271231	-0.348949									-0.234124	-0.0865132	0.563603	-0.204746	0.0684248	0.213874
-0.195607	0.119464	-0.10423	0.151926	-0.177392	-0.400762									-0.17958	0.134323	-0.426374	0.0639909	0.4512	0.0602178
-0.189729	-0.268008	-0.181086	-0.133598	-0.213838	-0.622246									-0.123057	0.00720642	0.00602043	0.202463	0.154118	0.0774421
-0.05978	-0.225203	-0.435121	-0.452452	-0.179126	-0.276307									-0.270035	-0.000175358	0.546929	0.159897	-0.501647	-0.125024
0.0807614	-0.171951	-0.406255	-0.384917	-0.47382	0.165805									-0.314515	-0.160648	0.293736	-0.20865	-0.180294	0.49999
-0.250472	-0.314976	-0.00480679	0.249419	-0.397713	-0.294348									-0.0964008	0.217978	0.118069	-0.0663346	-0.321028	0.616415
-0.199377	-0.114425	-0.359587	0.100099	-0.130618	-0.115623									-0.133306	0.202213	-0.0304728	0.125365	-0.106505	0.226814
-0.0270528	-0.0532603	-0.375387	-0.651709	-0.107973	-0.255234									0.622491	0.564055	0.206373	0.6198	-0.529476	0.0458692
-0.248419	0.305063	-0.168699	-0.132295	-0.722867	-0.418264									-0.294711	-0.389769	-0.458139	0.101618	-0.261854	0.69165
-0.274583	-0.323546	-0.0416715	-0.0206323	-0.338714	-0.492521									-0.116834	-0.43512	0.22946	0.143505	-0.160659	0.00968952
-0.186657	-0.0728312	-0.438018	-0.21302	-0.641972	-0.217806									-0.156265	0.446987	0.556104	0.593675	-0.481185	-0.12769
0.0034823	-0.338564	-0.518336	-0.0139106	-0.612598	-0.408361									-0.285846	-0.384548	-0.271994	-0.17313	-0.182336	0.334137
-0.177963	-0.486382	-0.652382	-0.146735	-0.212725	-0.425667									-0.393895	0.0408486	-0.0423849	-0.134436	-0.33665	-0.0642923
-0.672794	0.180426	-0.368082	0.0221266	-0.0547122	-0.2047									-0.288895	-0.0255259	-0.449405	0.0967172	-0.022987	0.347331
-0.0600704	-0.434681	-0.348506	-0.221912	0.50446	-0.436293									-0.397028	-0.262115	0.0672189	0.00620752	0.235763	-0.448642
-0.320111	-0.10848	0.0320505	-0.661893	-0.0131476	-0.203674									-0.293759	-0.448993	-0.0496368	0.242247	-0.402356	0.132024
-0.0198474	0.283695	-0.435453	-0.339444	0.254283	-0.343227									-0.368422	-0.137225	0.17024	0.510822	-0.233046	0.217501
-0.344254	-0.175836	-0.819972	-0.553411	0.0208967	-0.717796									-0.15392	-0.200783	-0.173784	-0.571124	0.00587976	-0.49571
-0.216818	-0.697103	-0.390707	-0.31758	-0.317338	-0.628966									-0.463949	0.604437	-0.129975	0.0772189	0.295197	0.157202
-0.10336	0.0715421	-0.265376	-0.248692	-0.485561	-0.166331									-0.310045	-0.267708	0.19681	-0.325782	-0.131857	0.143381
-0.349518	-0.638302	-0.771693	-0.222561	-0.457666	-0.182729									-0.296444	0.0517164	-0.242188	-0.0840261	-0.0859041	0.196369
-0.027712	-0.470321	0.154476	0.0953814	-0.158487	-0.0334265									-0.328751	-0.152031	0.457471	0.126365	0.2246	0.161352
0.336267	-0.421338	-0.701823	-0.369026	0.378038	-0.122821									-0.229152	-0.0443638	-0.321827	-0.0533324	0.0908072	0.151305
-0.201467	-0.0369679	-0.677067	-0.067074	0.0727355	-0.243177									-0.123904	0.351087	-0.247956	-0.0616944	0.238343	0.244203
0.00487827	-0.579868	0.147296	0.141905	0.022613	-0.108573									0.171989	0.00571626	-0.00652027	0.206898	-0.446022	0.500031
0.272348	-0.0886444	-0.203529	0.236634	-0.313477	-0.057494									0.0459813	-0.327142	-0.0475792	0.0965852	-0.351277	0.150032
0.520976	-0.223078	-0.670067	-0.0964275	-0.190534	-0.503472									0.392802	-0.143333	-0.00464423	-0.0129653	-0.26124	0.36506
-0.43467	-0.0936499	-0.470388	-0.123062	-0.484093	-0.376155									-0.108499	-0.119785	0.13715	-0.387617	-0.0782177	0.0358321
0.397562	-0.306018	-0.566177	0.328381	-0.808828	0.104672									-0.287594	0.394356	-0.26897	0.433518	-0.438521	0.178687
-0.0524246	-0.0963998	-0.570078	0.596037	-0.373544	-0.00172896									-0.353103	-0.0556085	-0.2391	-0.18769	-0.134773	0.167812
-0.506326	0.228825	-0.526147	-0.0740031	-0.517614	-0.0506968									0.408915	-0.0103383	0.0121079	0.230555	-0.366075	0.335984
-0.749438	-0.296946	0.476111	-0.338563	-0.802872	-0.604115									-0.26315	-0.269614	-0.0893904	0.493993	0.160284	0.0917596
-0.0233623	-0.52208	-0.279337	-0.616611	-0.172572	-0.47936									-0.328547	-0.227079	-0.173662	0.19413	-0.0583266	0.317383
-0.568179	0.0337004	-0.325117	-0.0853313	-0.322934	-0.52232									0.069984	-0.327188	-0.242447	0.623199	0.0608543	0.41512
0.0144197	-0.0573848	-0.170209	-0.166845	-0.423588	-0.522288									0.259155	-0.240811	-0.151668	0.5902	0.0941101	0.249427
-0.483266	0.391515	-0.111867	-0.19627	-0.451575	-0.776992									-0.240081	-0.139791	-0.0284372	0.169212	-0.501848	-0.0652085
0.100279	-0.241008	-0.00671157	-0.274313	0.0845768	-0.30169									-0.357315	-0.304823	0.389378	-0.0405628	-0.47846	0.363755
-0.345487	-0.0755854	-0.379275	-0.0933486	-0.254439	-0.33421									0.463072	0.0688902	-0.138669	0.718015	0.341109	0.155362
-0.345832	-0.62451	-0.501776	0.0244733	-0.221335	-0.454507									-0.0173406	-0.208645	-0.0450221	0.67297	-0.139391	0.312794
-0.678293	-0.190084	-0.259487	0.265759	-0.496661	-0.307462									0.429238	-0.315371	0.722798	-0.158108	-0.239816	0.553973
-0.373178	0.542434	-0.194565	-0.228096	-0.292555	0.151328									0.204608	0.155943	0.442986	-0.141155	-0.335742	0.180546
-0.604273	-0.30891	-0.573817	-0.153119	-0.0783164	-0.0964754									-0.384027	0.0383402	0.248597	-0.34255	-0.0371992	-0.136624
-0.175222	-0.0068837	-0.351481	0.396054	-0.105838	-0.308629									0.00757417	0.0960094	-0.348383	0.11472	-0.318953	0.312676
-0.403823	-0.298772	0.00734071	0.254733	-0.505692	-0.333219									-0.384537	-0.264378	-0.198607	0.642425	-0.179802	0.363761
-0.594539	-0.188658	-0.311372	-0.162001	0.0472526	-0.263464									-0.284927	-0.0267251	0.114581	0.728759	-0.00798833	0.163032
-0.40496	-0.303637	-0.0899878	-0.223185	-0.402999	-0.00328029									0.209798	-0.170479	0.128208	0.556232	-0.197683	0.115506
-0.0218006	-0.354163	-0.583654	0.176346	-0.520006	-0.348533									0.551752	0.0131437	0.0340266	0.182342	-0.301654	-0.225435
-0.57849	-0.375063	-0.728287	-0.308785	0.0476044	-0.249918									0.141001	0.251979	0.715975	0.293929	-0.0612322	-0.371928
-0.307976	0.0712571	-0.308524	-0.436244	0.32814	-0.1027									-0.124787	-0.326319	-0.0685775	-0.488645	0.307241	-0.0450745
-0.344054	-0.365737	-0.262149	-0.329958	-0.462378	-0.106679									-0.439316	-0.261995	-0.0556386	-0.206063	-0.393569	0.257284
-0.204453	-0.24452	-0.36075	0.0339237	0.107135	-0.0923073									0.00696266	-0.312403	-0.0111872	0.22554	0.313993	0.231807
-0.171	-0.580521	-0.395167	-0.13528	0.01742	-0.114988									-0.509508	0.444585	-0.248397	0.127367	0.115195	-0.121389
-0.746967	-0.16907	-0.168083	-0.260113	-0.275913	-0.264622									-0.0393651	0.167238	-0.348417	0.40032	-0.223459	-0.477141
-0.134062	-0.214527	-0.403362	-0.0766359	-0.261253	0.375414									0.201717	-0.283954	0.124997	0.451921	-0.288063	0.150363
-0.746371	-0.0103178	-0.436337	-0.382691	0.0700649	-0.649245									-0.176426	-0.484361	0.184798	-0.301319	-0.273451	-0.0698363
0.0465143	-0.523308	-0.346167	0.322486	-0.383029	-0.085934									0.0787401	-0.126563	-0.315865	0.427942	-0.54413	-0.0881149
-0.416698	-0.272484	-0.39234	0.407412	-0.291503	-0.574489									-0.214365	0.203701	0.00782468	0.128971	-0.14614	0.335734
-0.120411	0.0485817	-0.370624	-0.289692	-0.106335	-0.392048									-0.303426	-0.00365945	-0.158571	0.11729	0.238179	0.205601
-0.459973	0.046804	-0.224719	0.298333	-0.0898861	-0.382697									-0.193605	-0.136351	-0.067578	-0.136144	0.176717	0.0263278
-0.0674394	-0.22124	-0.207247	-0.125293	-0.106521	-0.476876									-0.159029	-0.192255	-0.0188897	-0.0632625	-0.0996572	-0.151843
-0.484737	-0.134125	-0.151767	-0.292233	-0.350691	0.171306									-0.131538	-0.177957	-0.0624117	-0.36472	-0.179692	-0.118674
0.170794	0.0169431	-0.162415	-0.0886158	-0.312958	-0.204788									-0.655553	-0.495066	-0.415245	0.0942539	-0.0491336	0.141829
-0.499338	0.145939	-0.0894937	0.437695	-0.451189	-0.388373									0.488425	-0.566667	-0.231952	0.599395	0.360239	-0.289612
[truncated: 1,243 more rows]
