# Supplementary material for: Evidence linking APOBEC3B genesis and evolution of innate immune antagonism by gamma-herpesvirus ribonucleotide reductases
Source: eLife journal article supplement (doi:10.7554/elife.83893), 2022-12-02

Figure 2B

Left Panel - EBV BORF2

IP

Anti-GFP

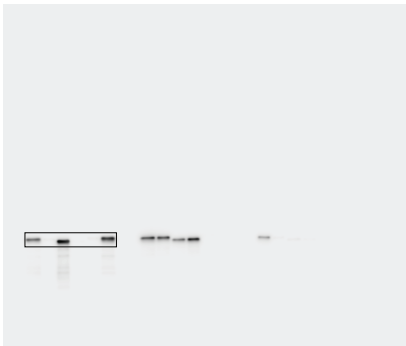

Anti-FLAG

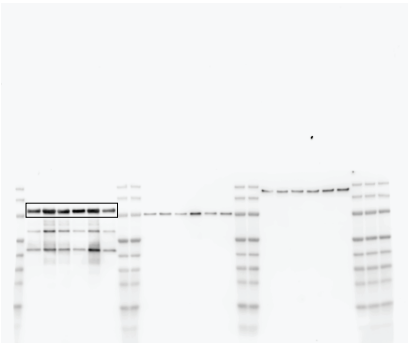

Input

Anti-GFP

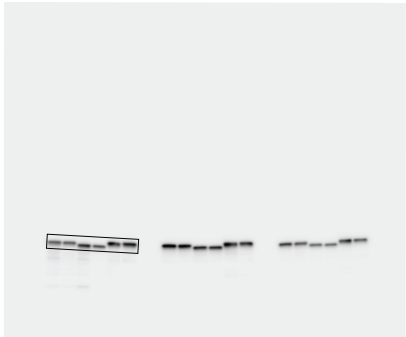

Anti-FLAG

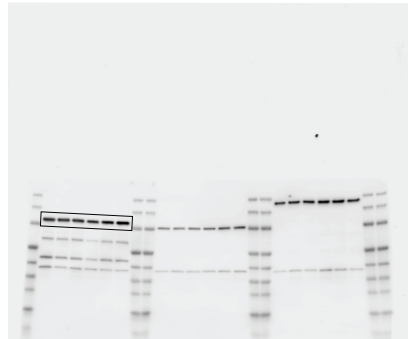

Anti-GAPDH

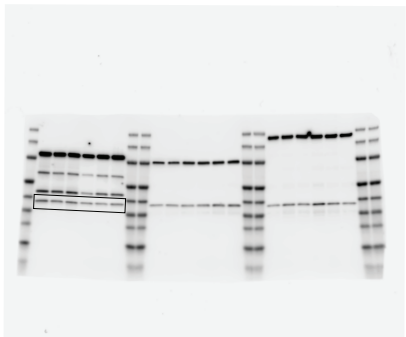

Right Panel - KSHV ORF61

IP

Anti-GFP

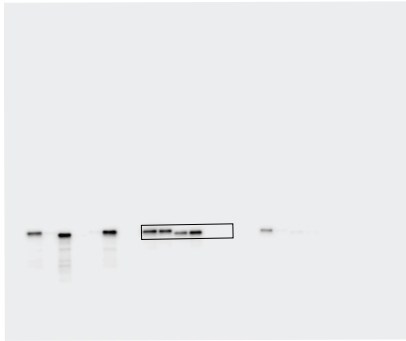

Anti-FLAG

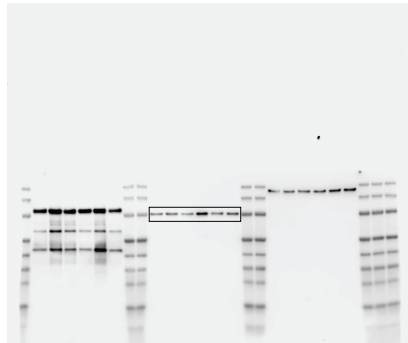

Input

Anti-GFP

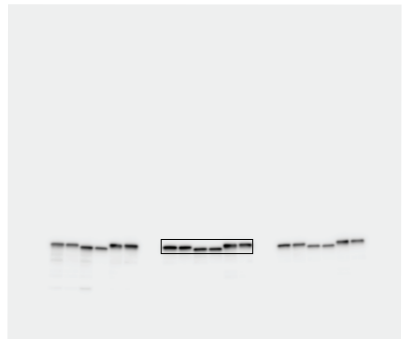

Anti-FLAG

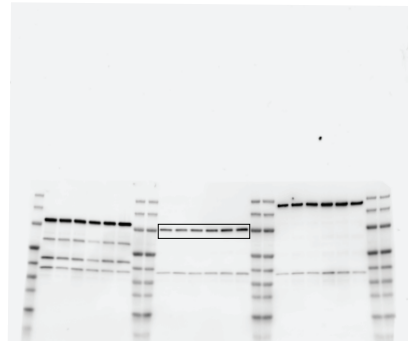

Anti-GAPDH

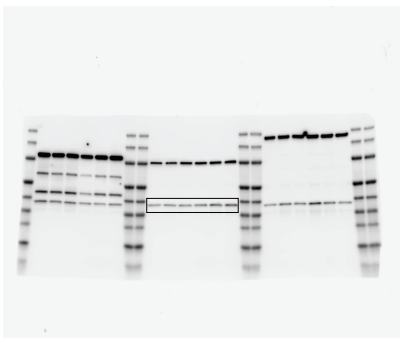

Supplement: supp [file elife-83893-supp-v1.zip]
