# Supplementary figures and images for: Evidence linking APOBEC3B genesis and evolution of innate immune antagonism by gamma-herpesvirus ribonucleotide reductases
Source: eLife journal article supplement (doi:10.7554/elife.83893), 2022-12-02

Figure 4A

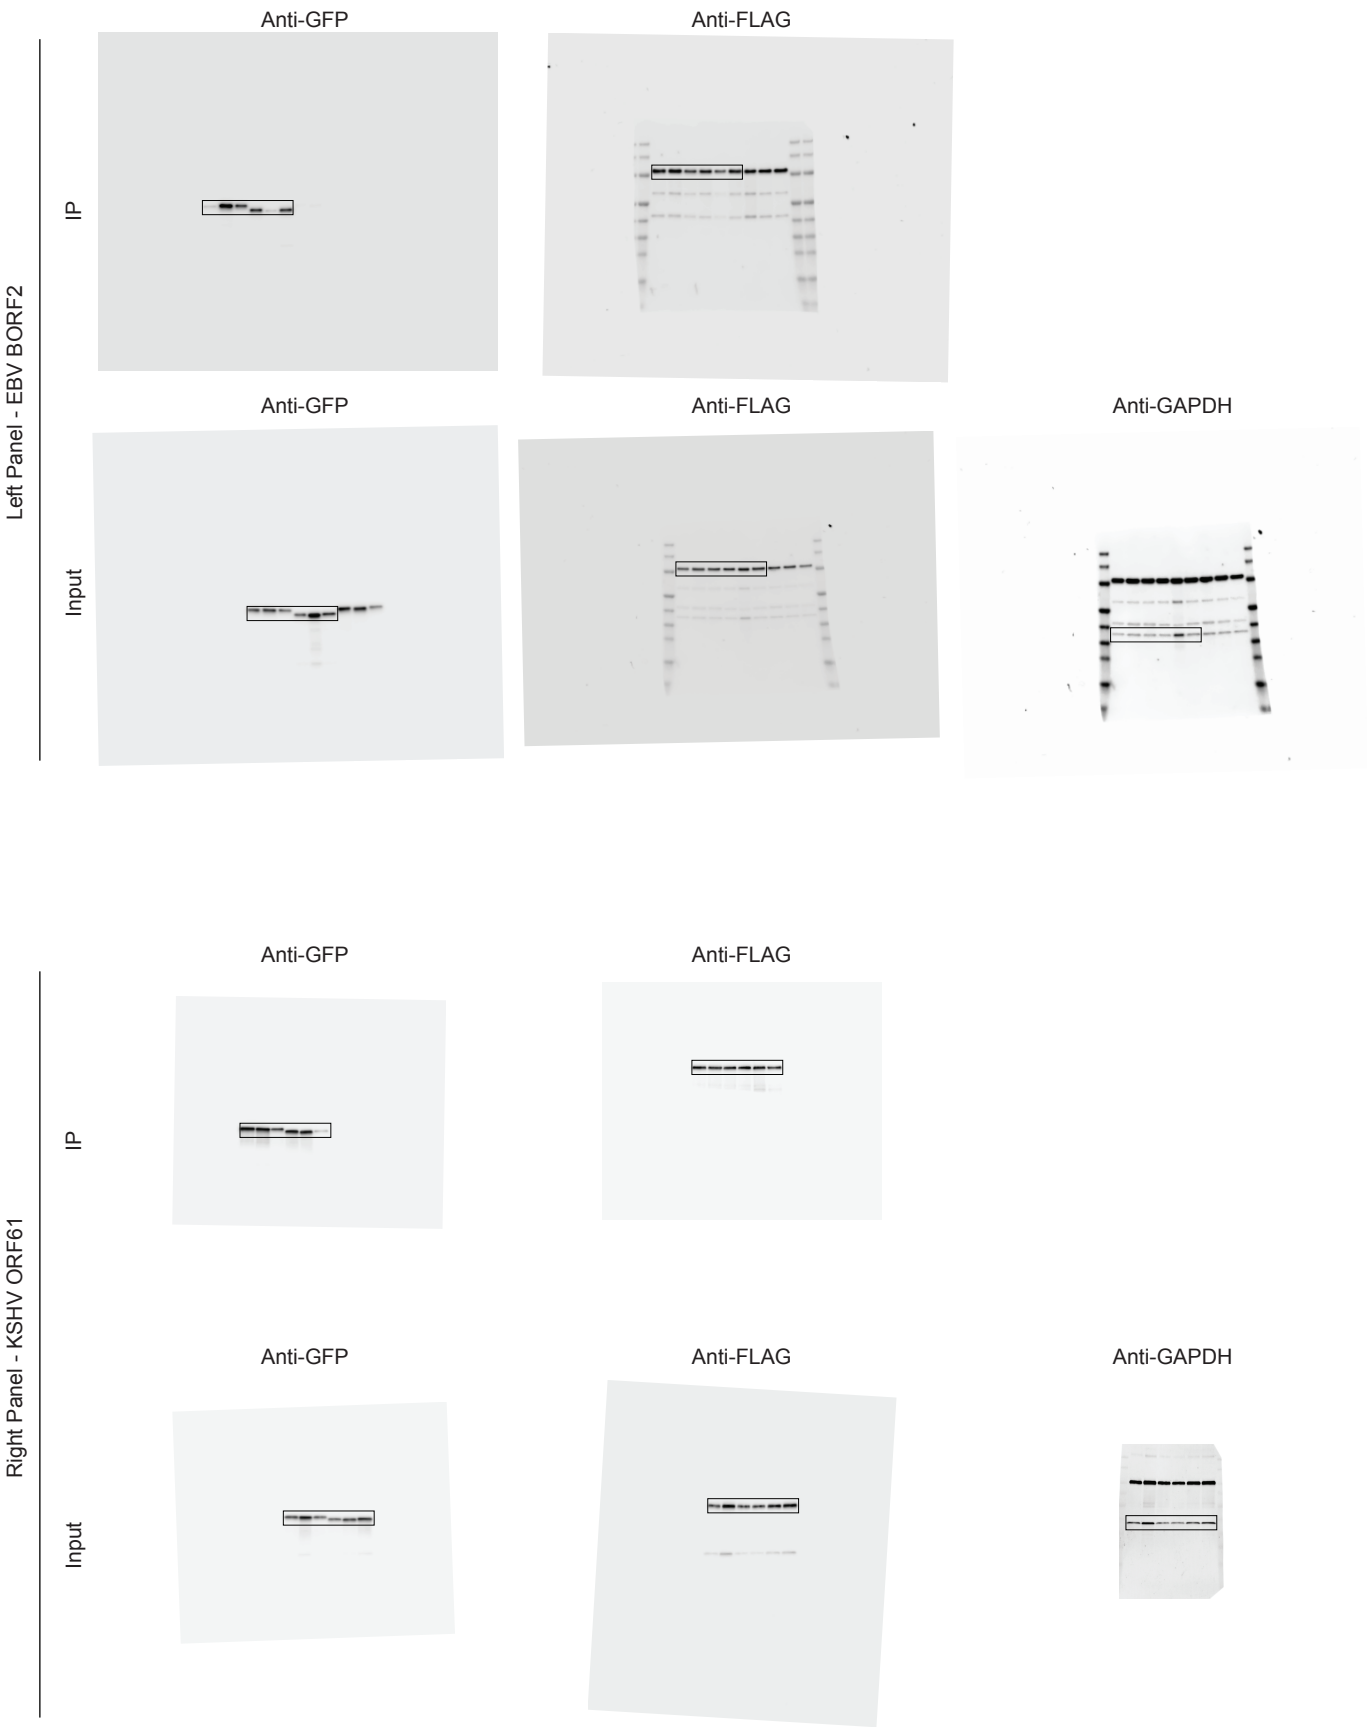

Supplement: supp [file elife-83893-supp-v1.zip]

Figure 7D

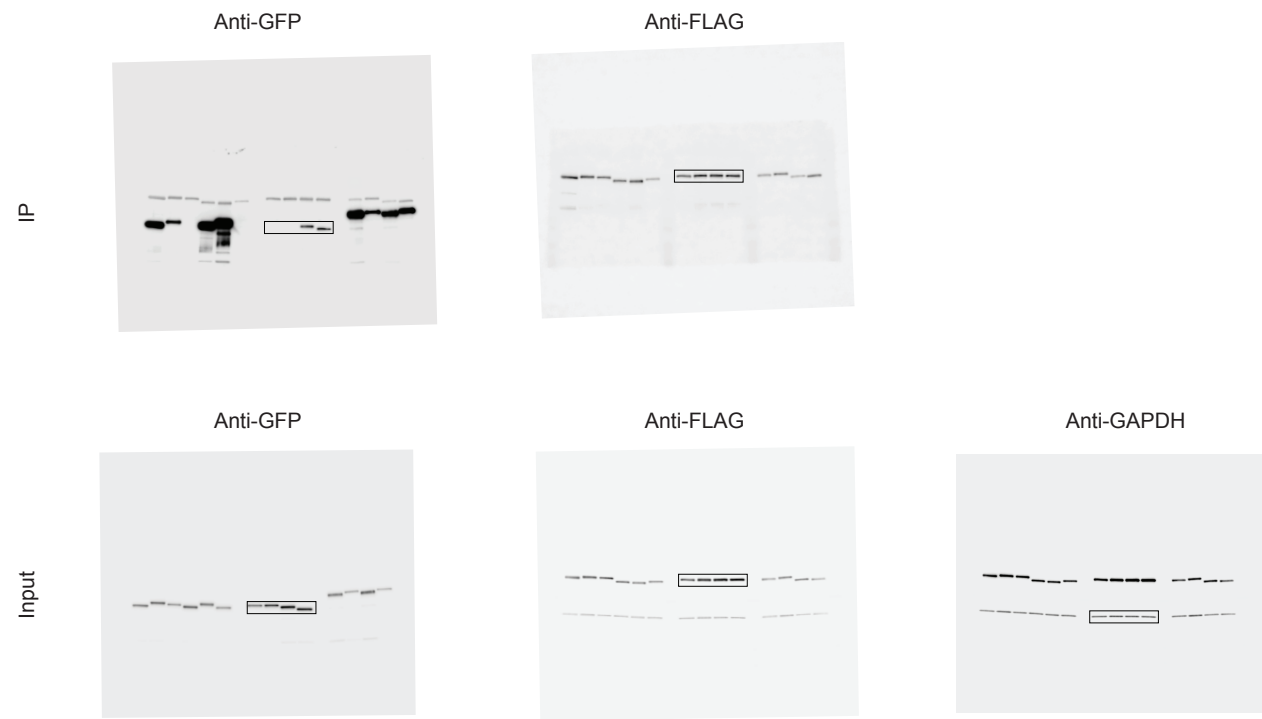

Supplement: supp [file elife-83893-supp-v1.zip]

Figure 8B

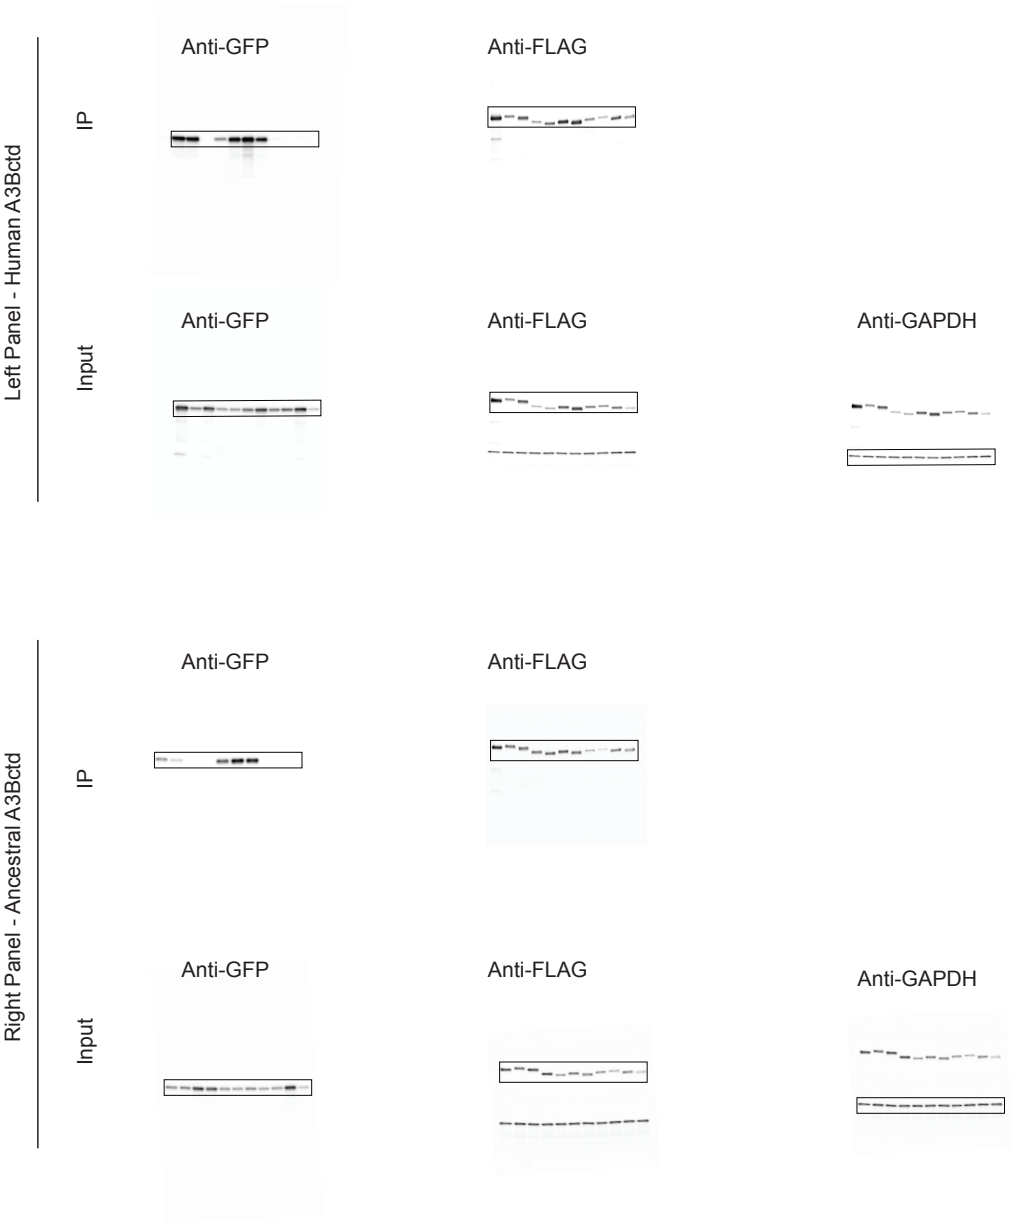

Supplement: supp [file elife-83893-supp-v1.zip]

Figure 7A

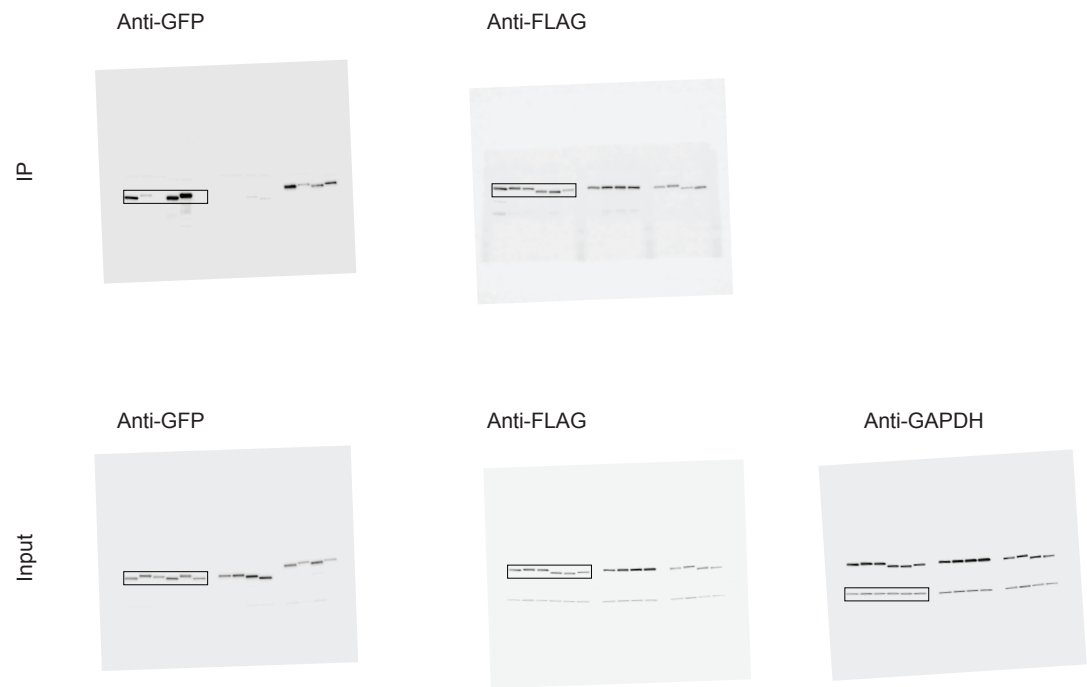

Supplement: supp [file elife-83893-supp-v1.zip]

Figure 8—figure supplement 2, panel B

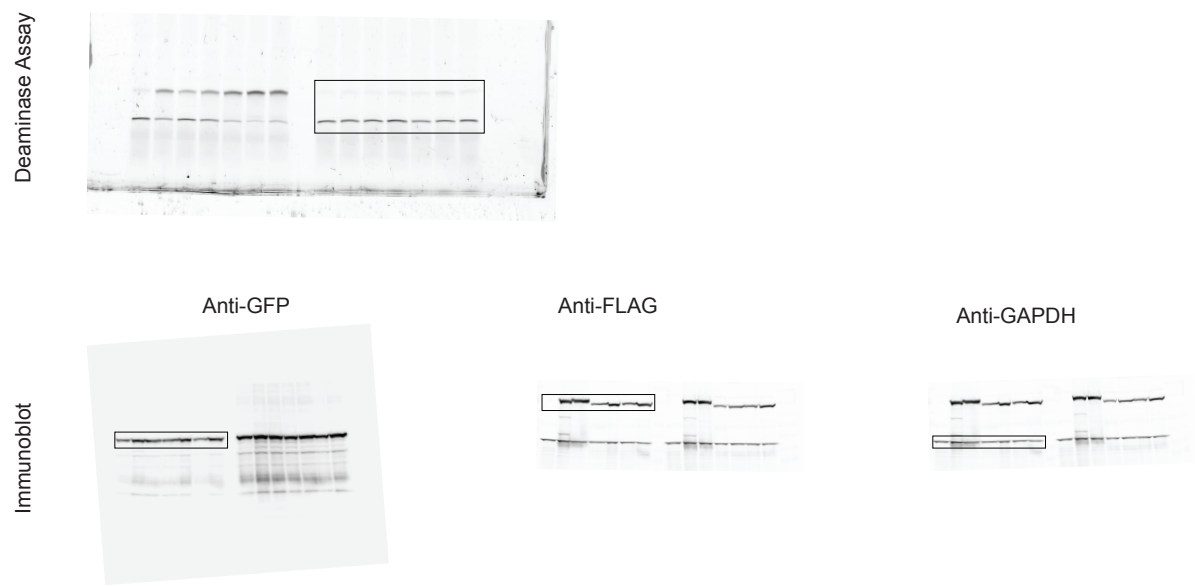

Supplement: supp [file elife-83893-supp-v1.zip]

Figure 3B

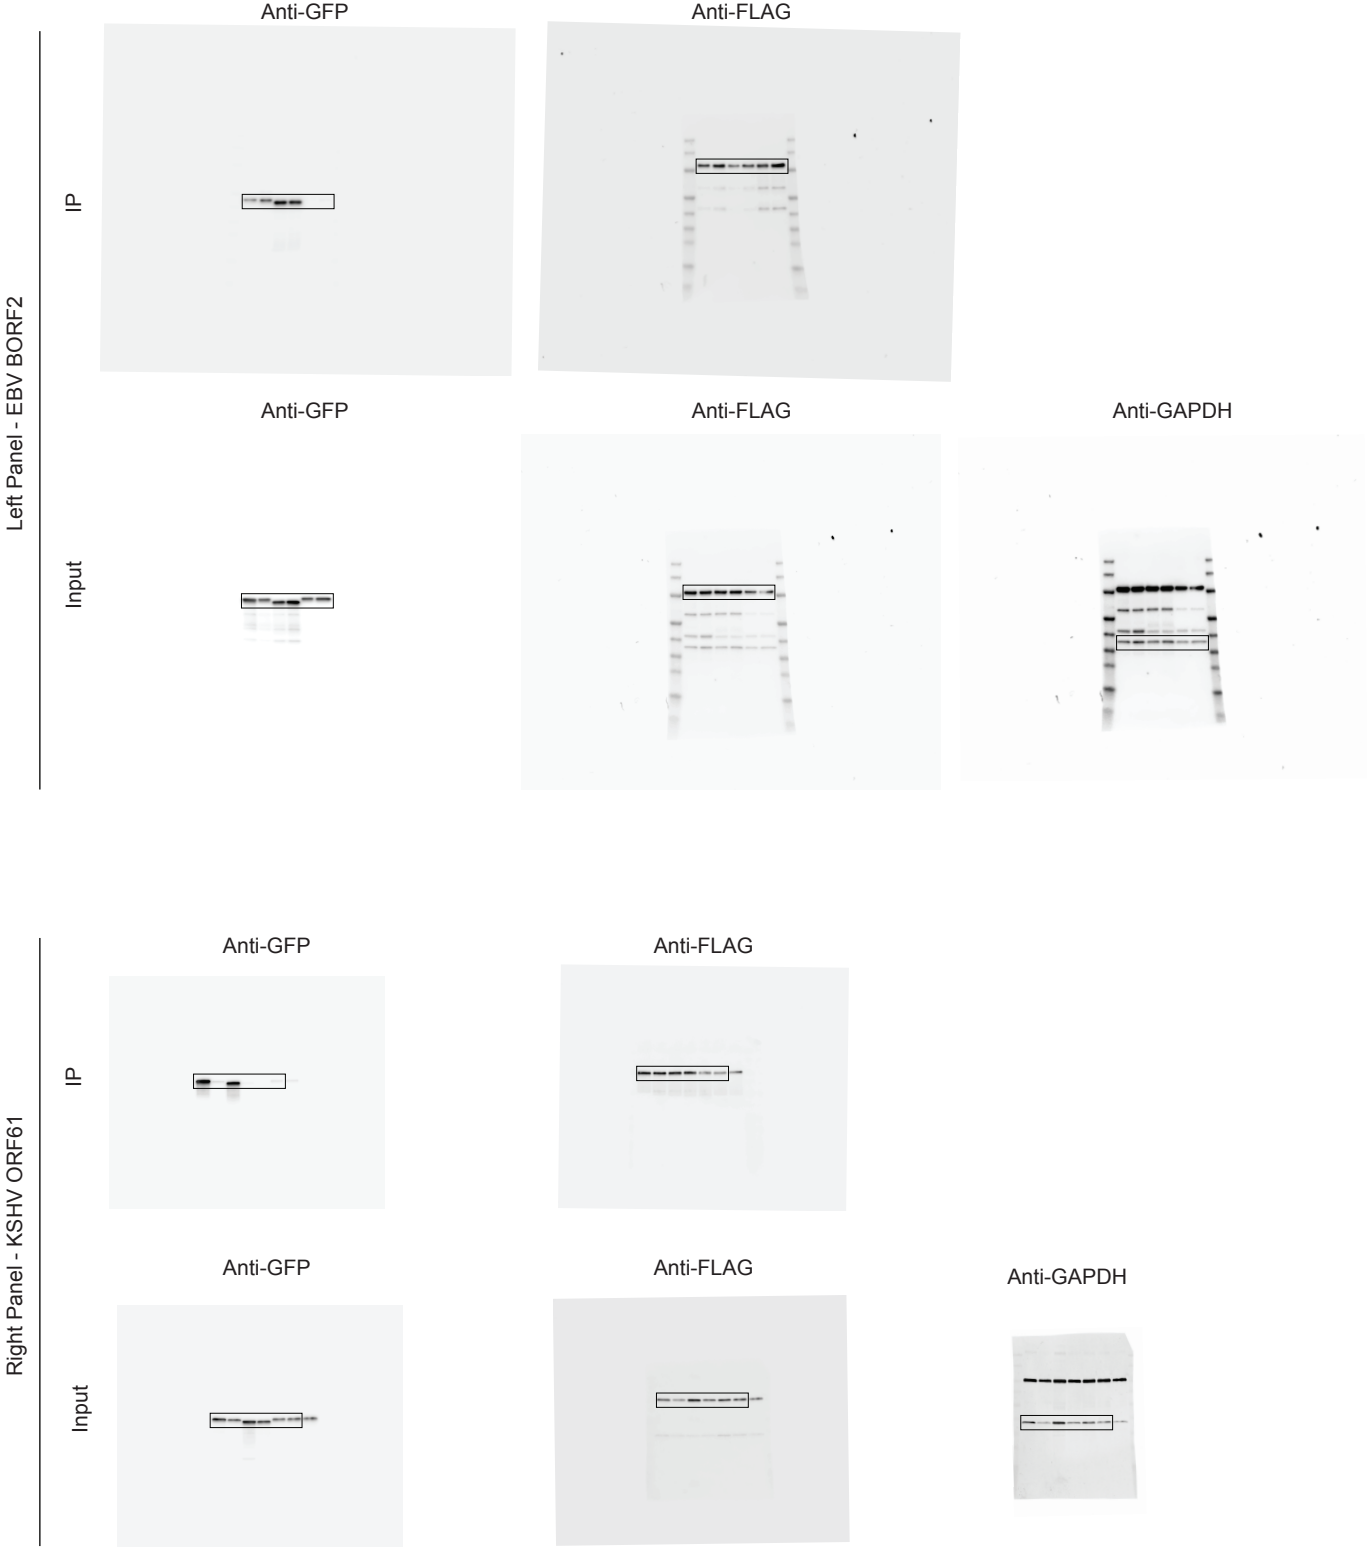

Supplement: supp [file elife-83893-supp-v1.zip]

Figure 6E

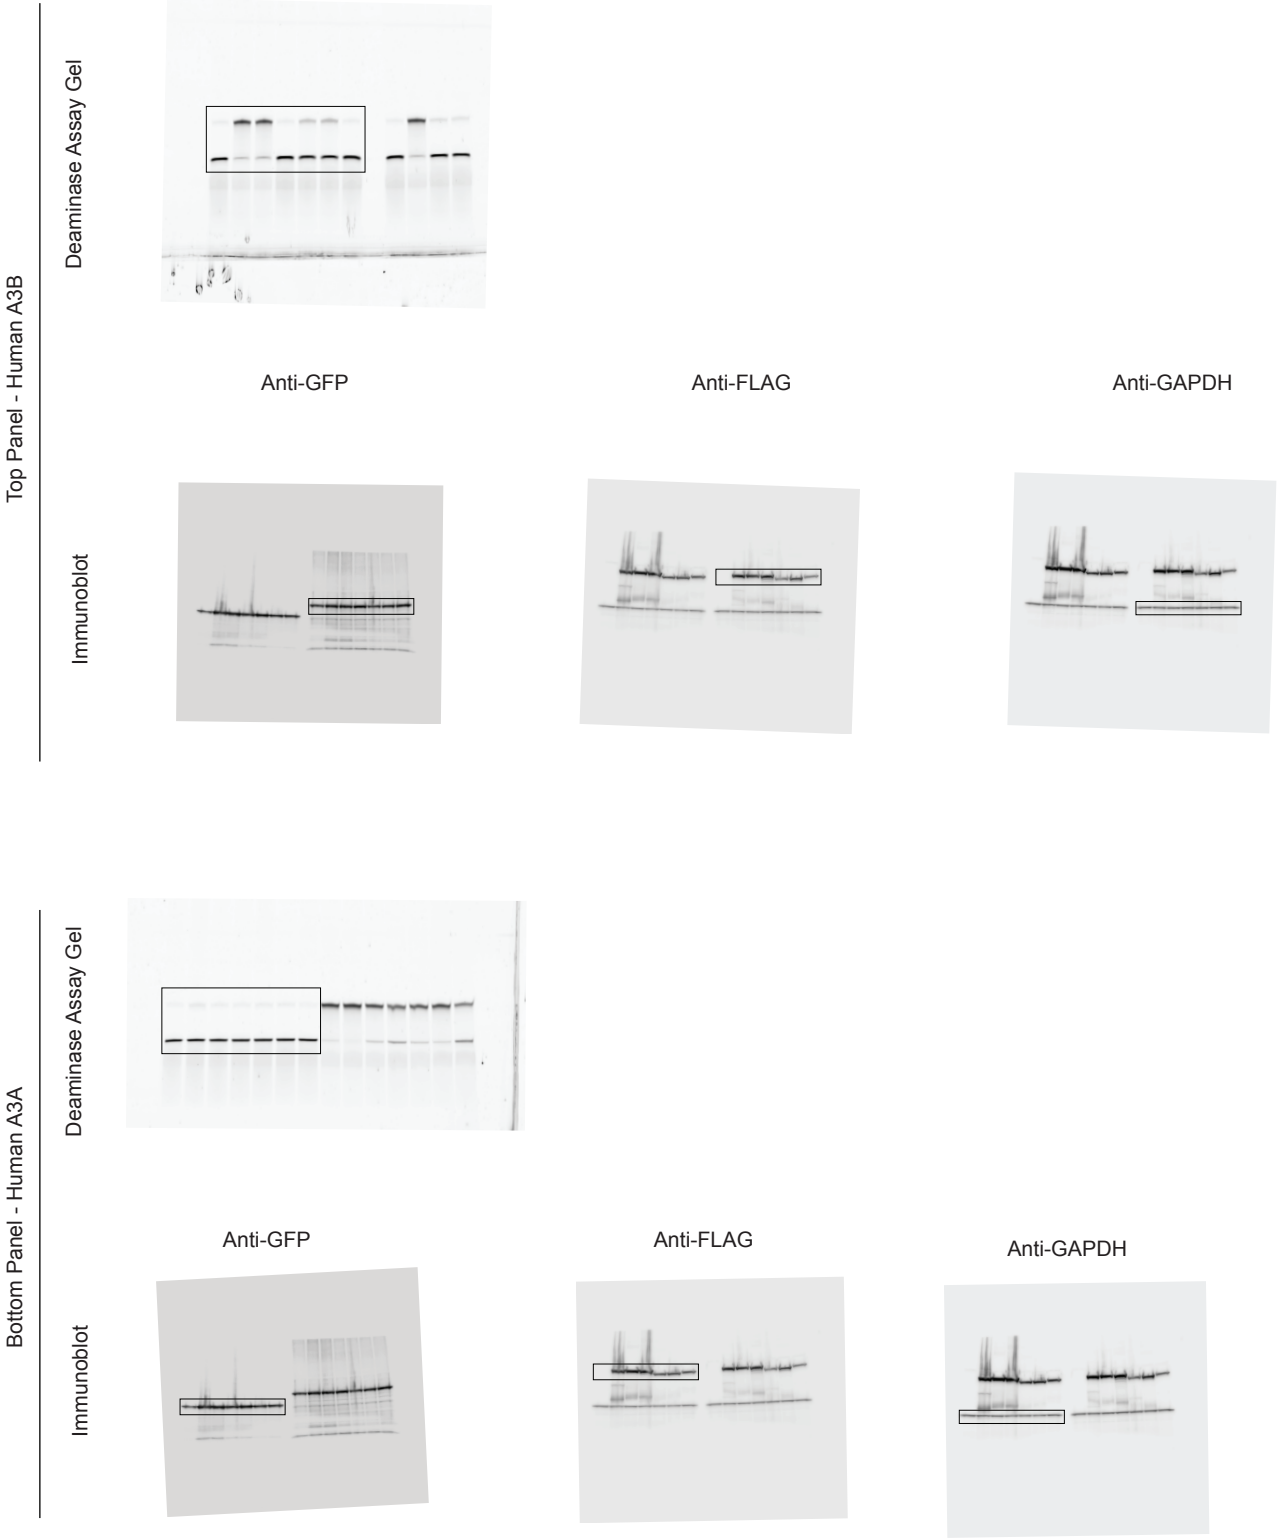

Supplement: supp [file elife-83893-supp-v1.zip]

Figure 8—figure supplement 3, panel A

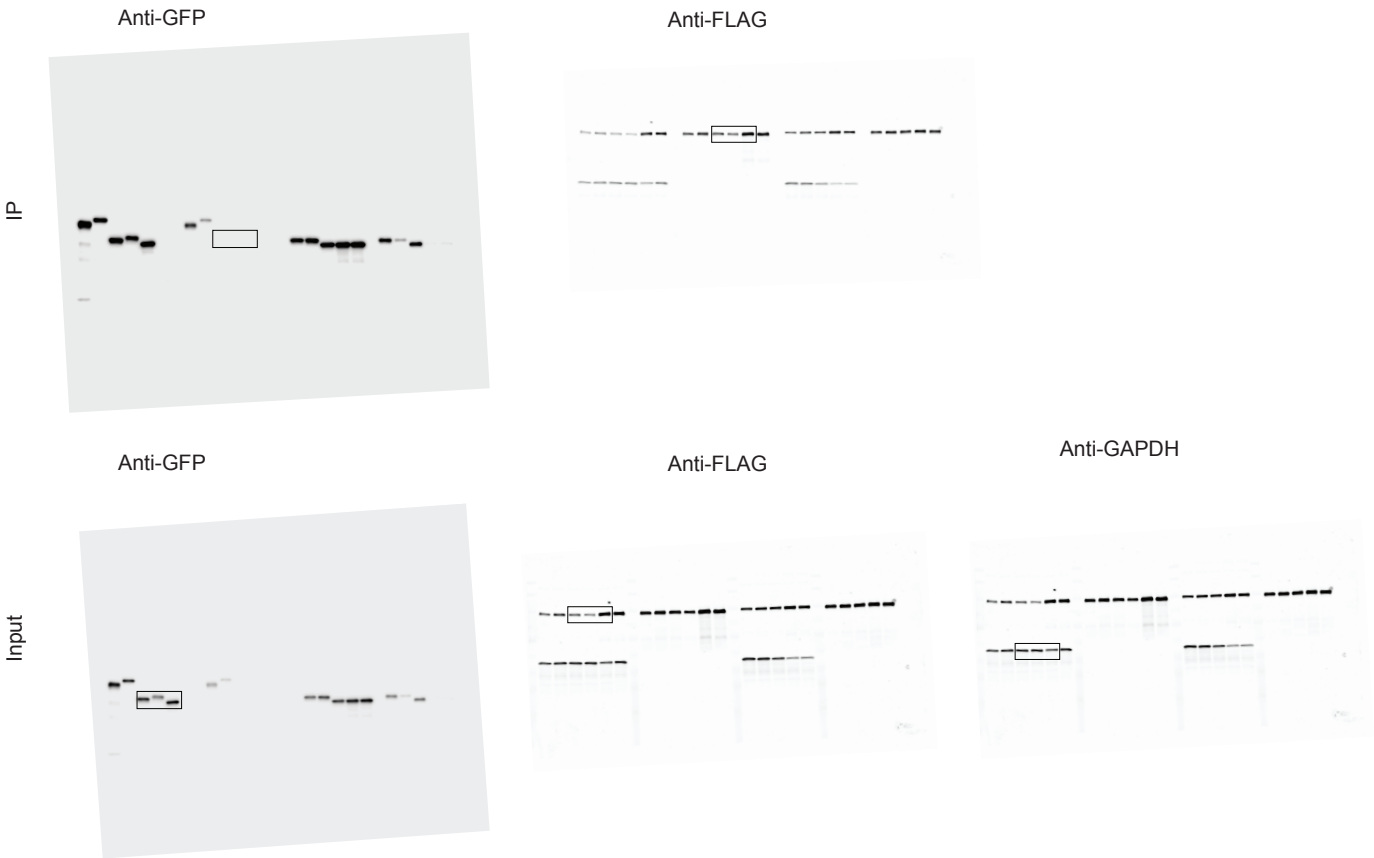

Supplement: supp [file elife-83893-supp-v1.zip]

Figure 5A

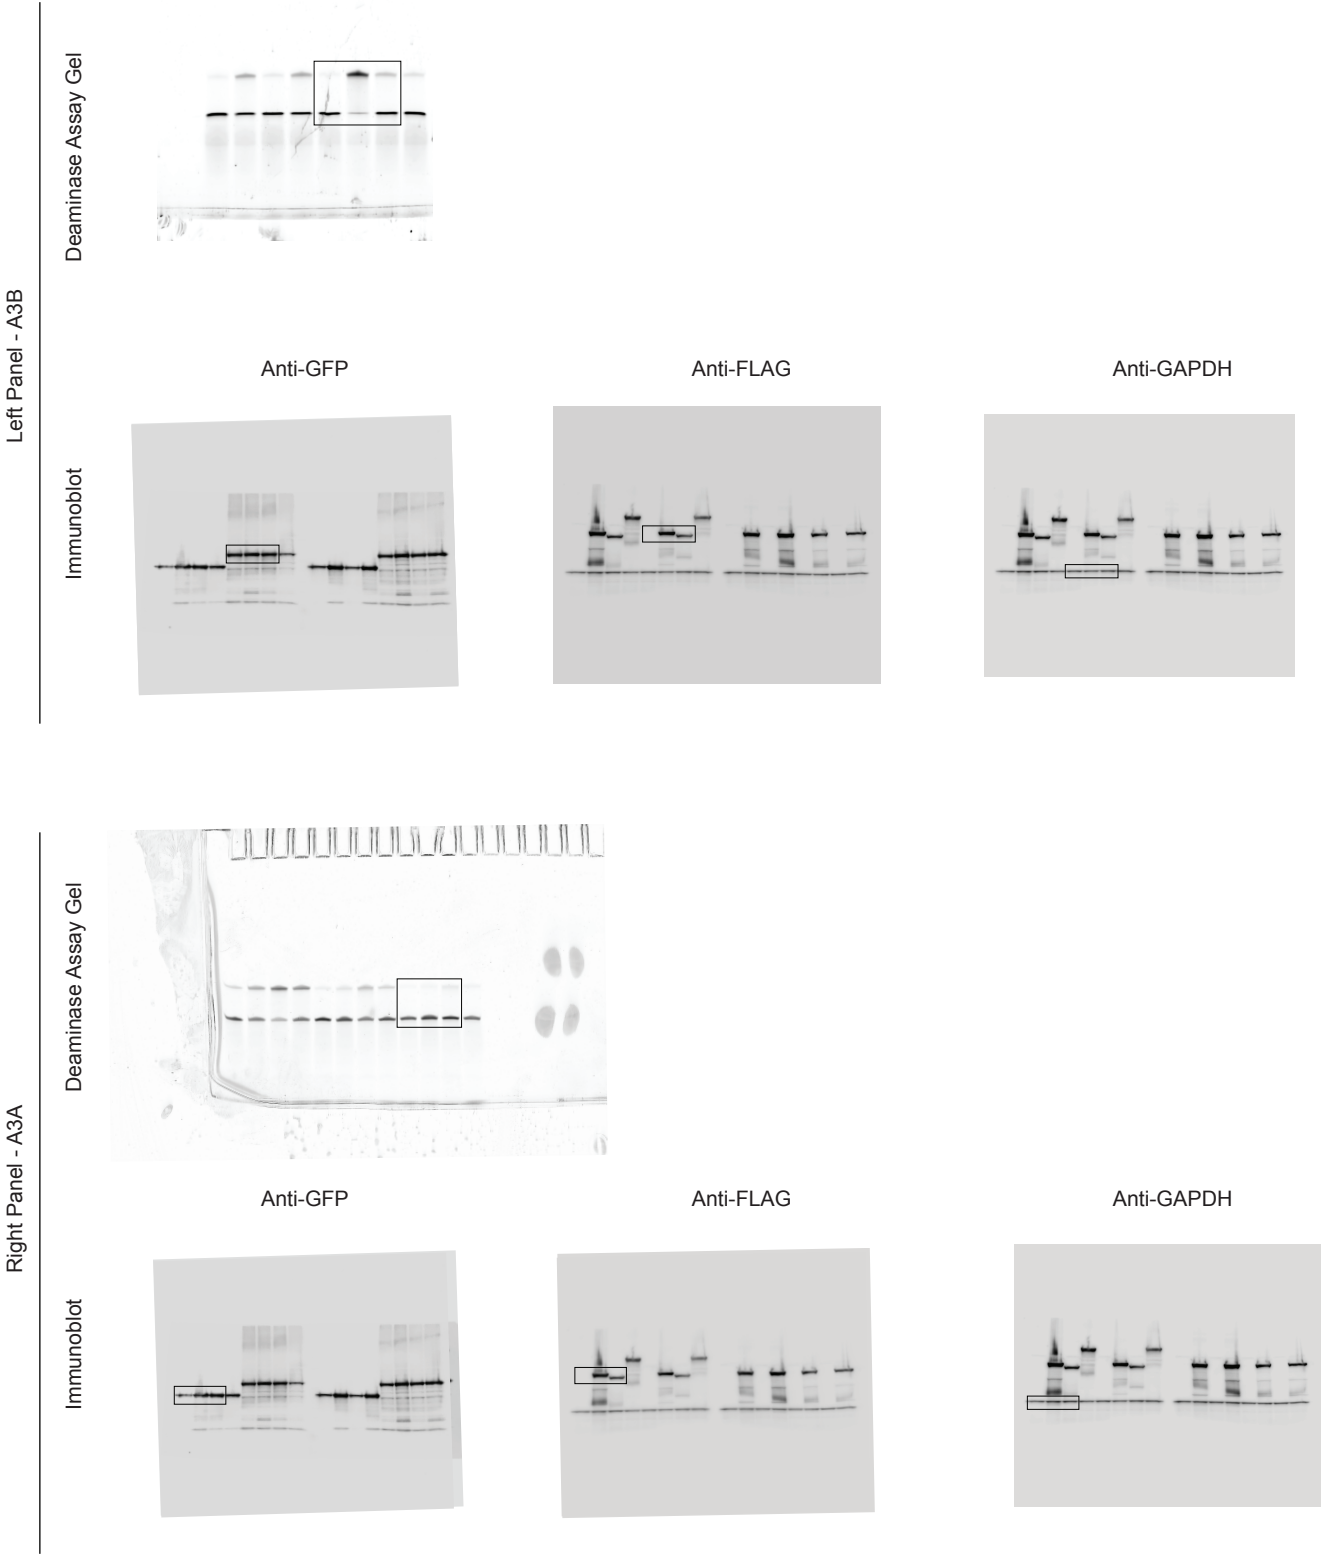

Supplement: supp [file elife-83893-supp-v1.zip]

Figure 5D

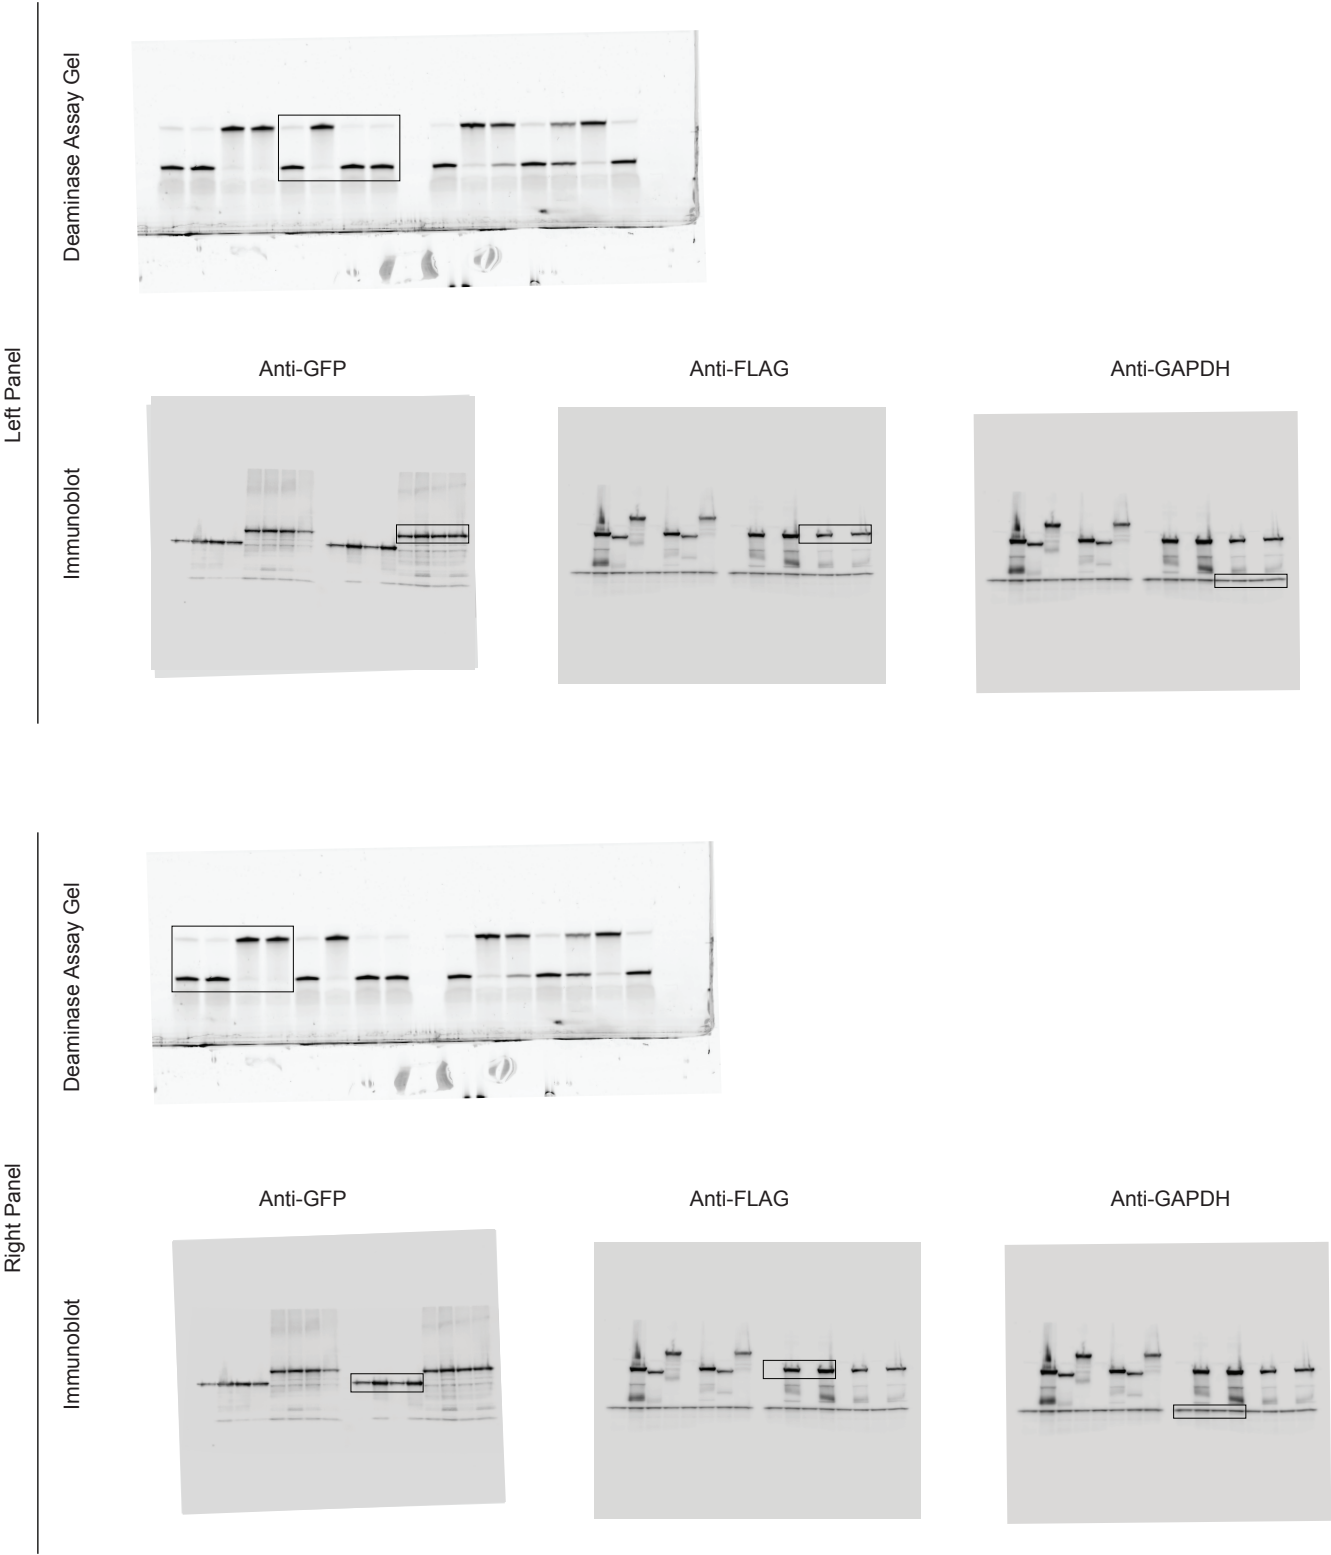

Supplement: supp [file elife-83893-supp-v1.zip]

Figure 8D

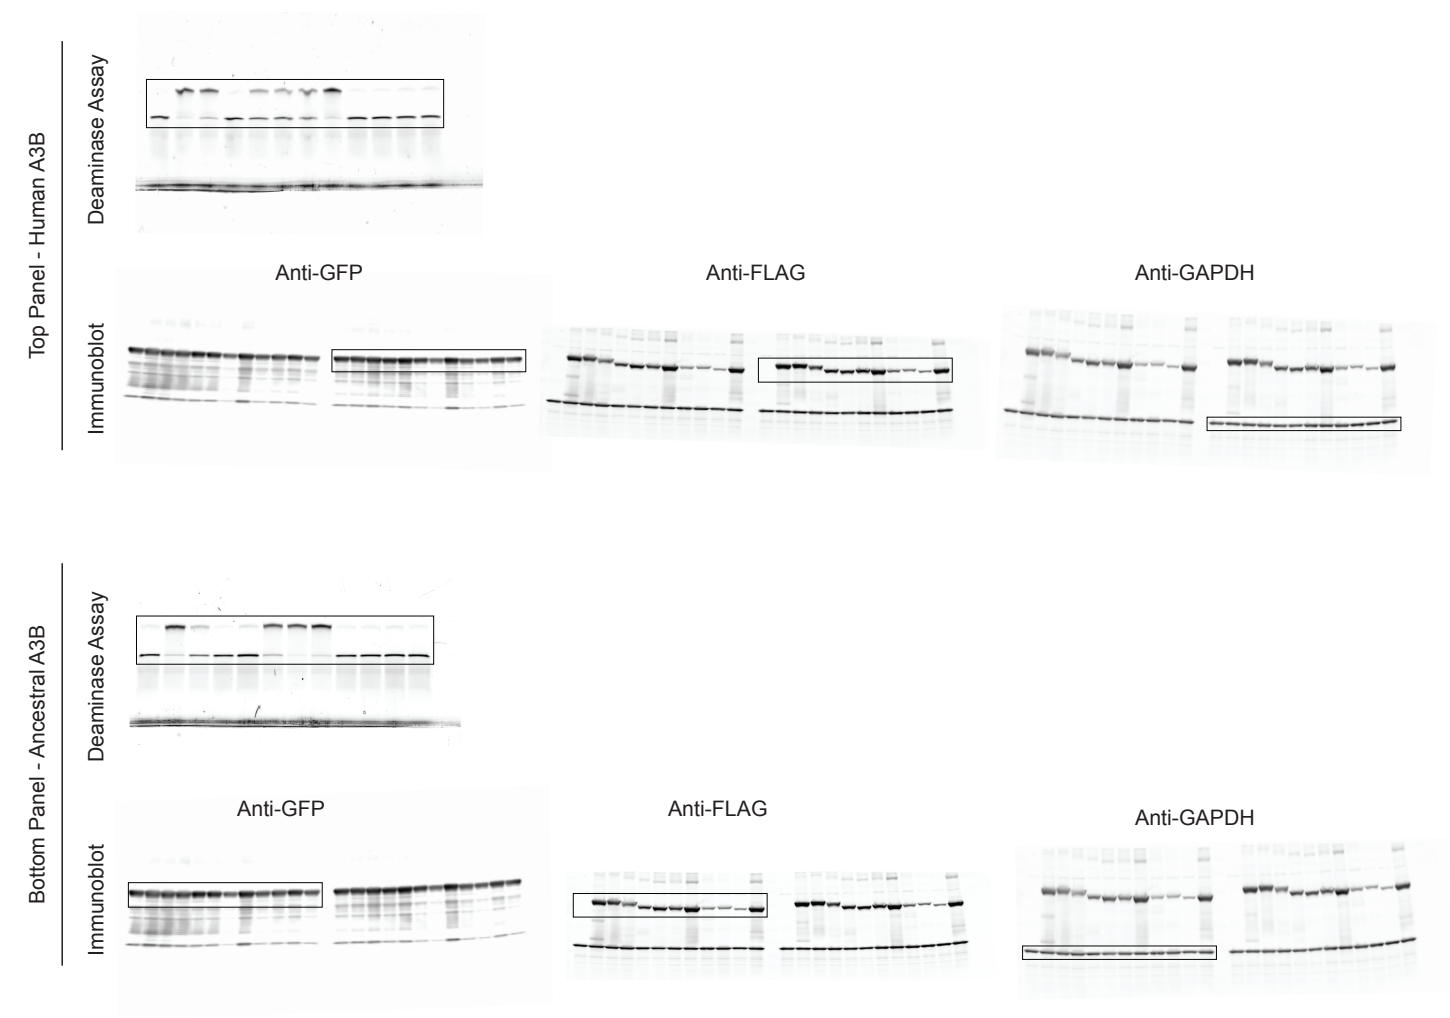

Supplement: supp [file elife-83893-supp-v1.zip]

Figure 6C

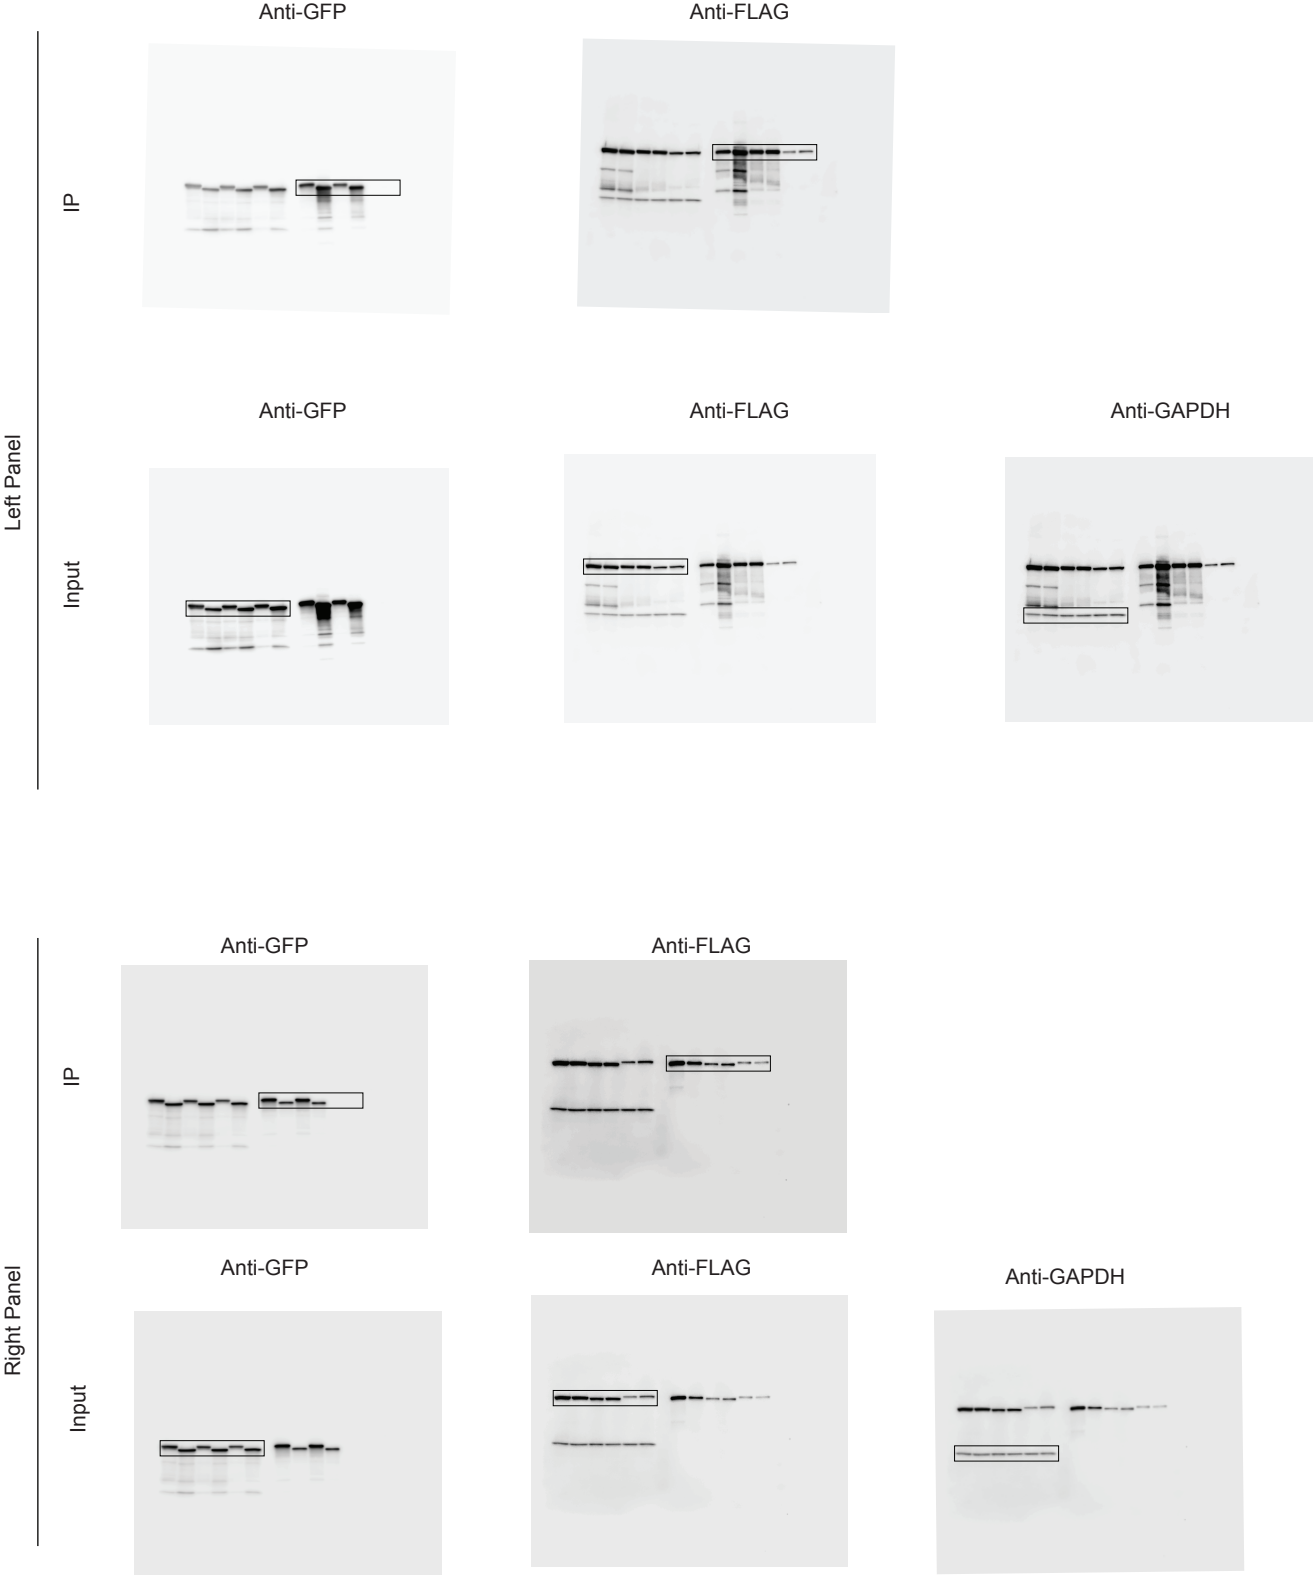

Supplement: supp [file elife-83893-supp-v1.zip]

Figure 5C

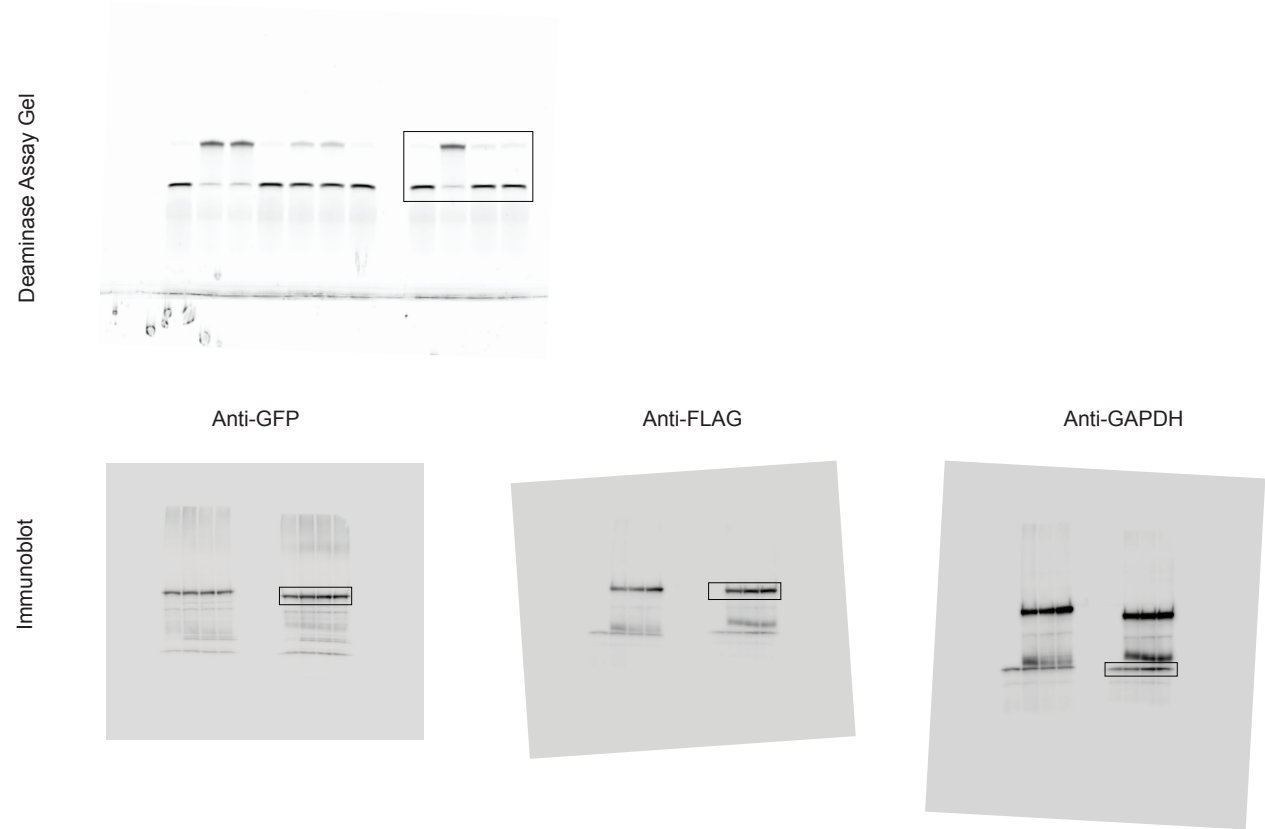

Supplement: supp [file elife-83893-supp-v1.zip]
